# Supplementary material
Source: publisher figshare collection journal article supplement (https://rs.figshare.com/ndownloader/files/15365432)
Supplement: Supplementary file 1 [file 15365432]

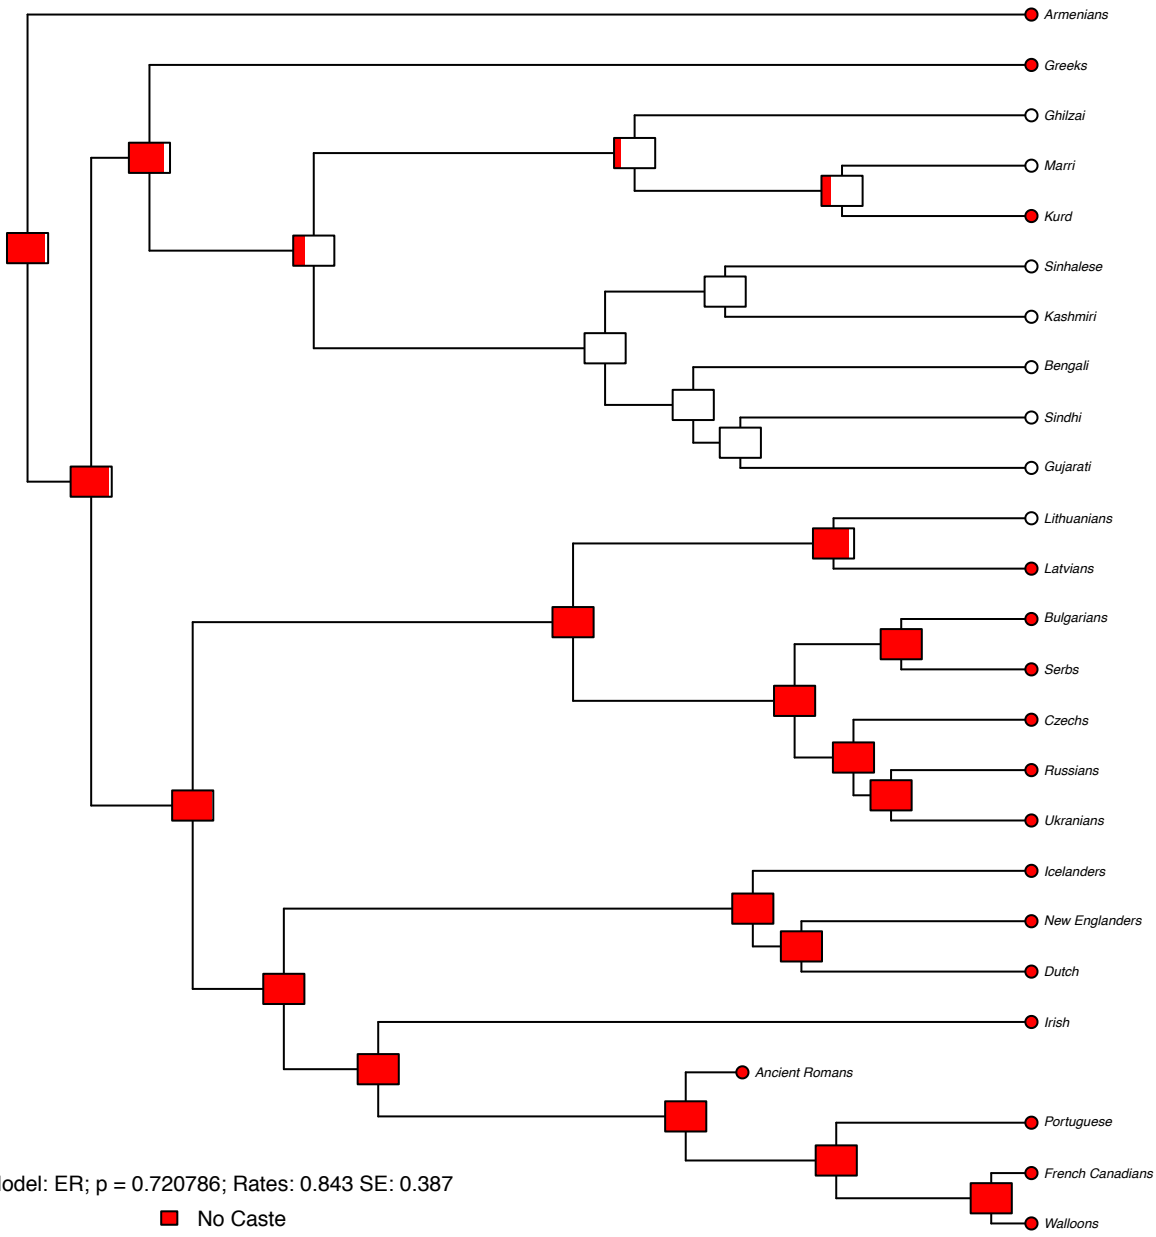

Model: ER;  $p = 0.720786$ ; Rates: 0.843 SE: 0.387

■ No Caste  
 Caste

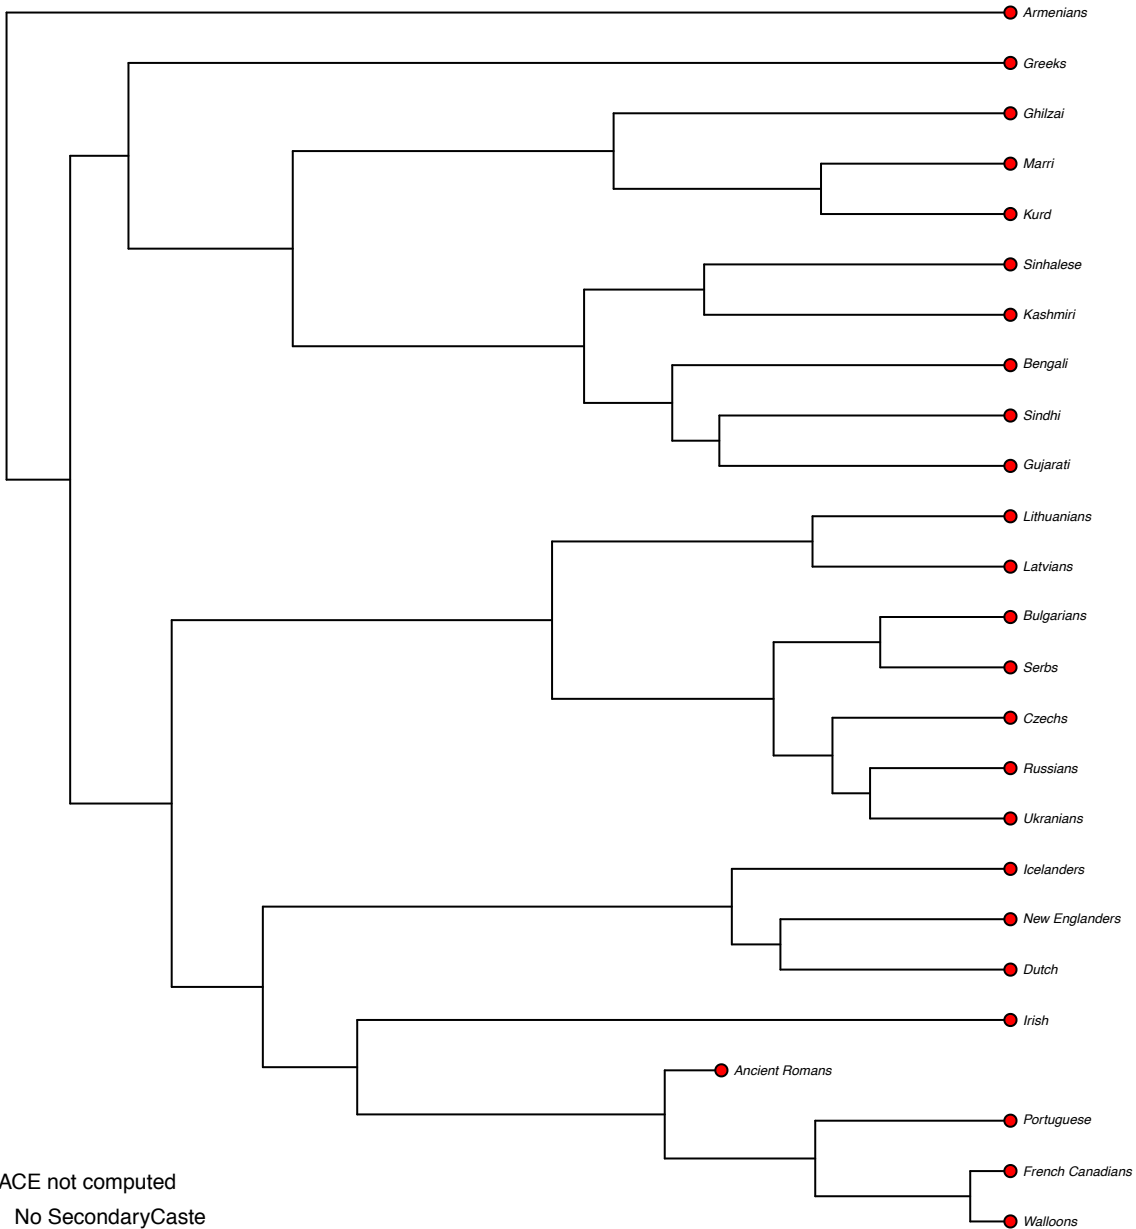

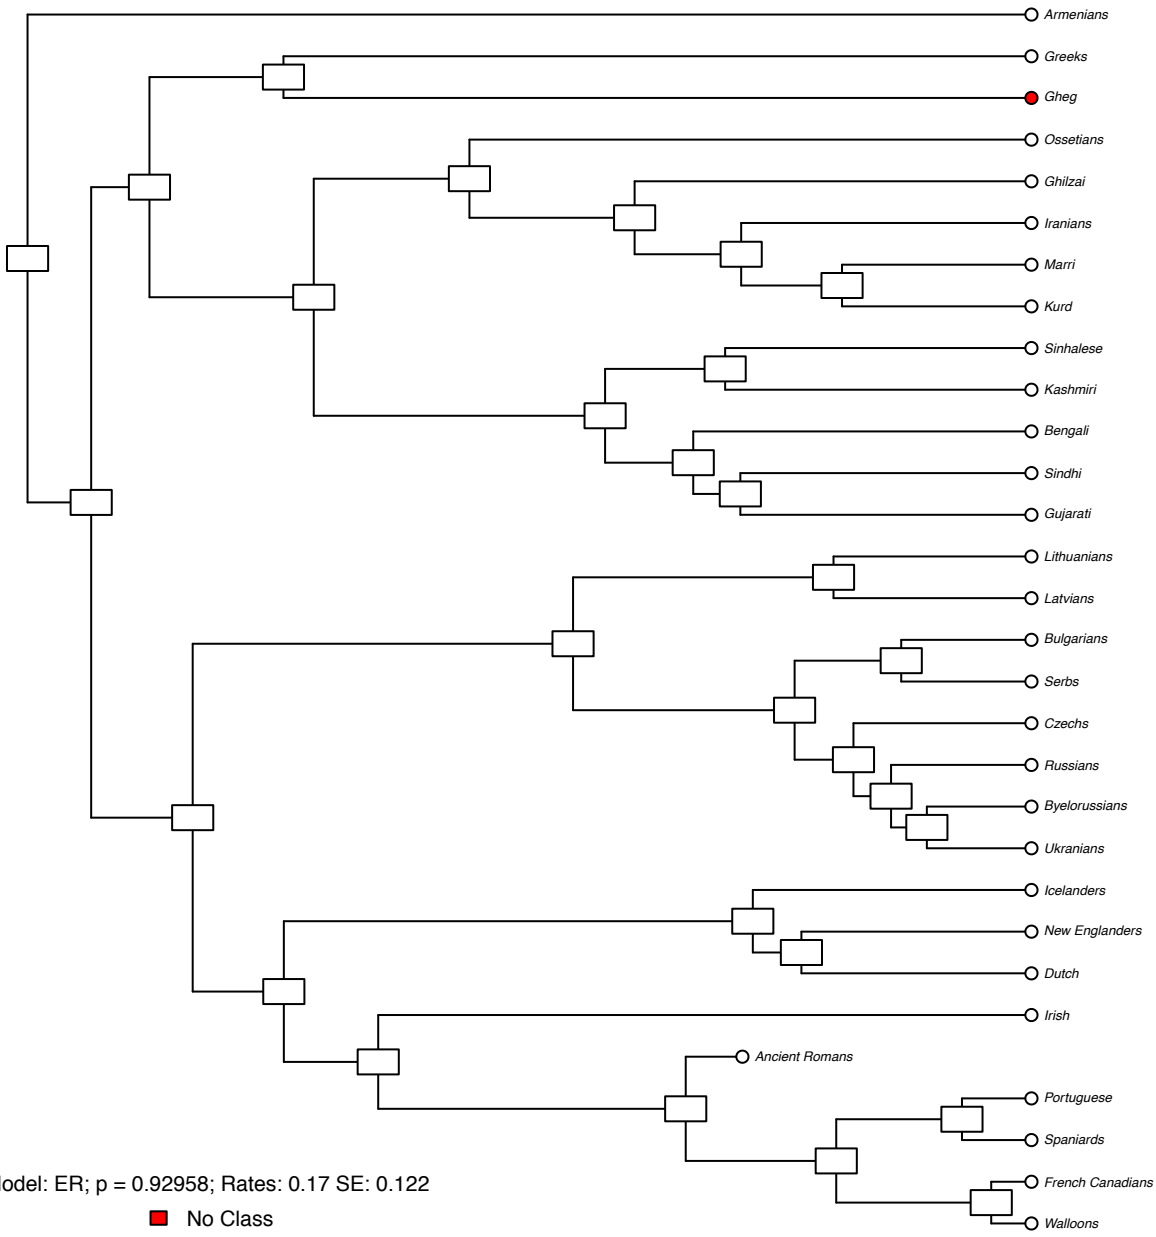

Model: ER;  $p = 0.92958$ ; Rates: 0.17 SE: 0.122

■ No Class  
 Class

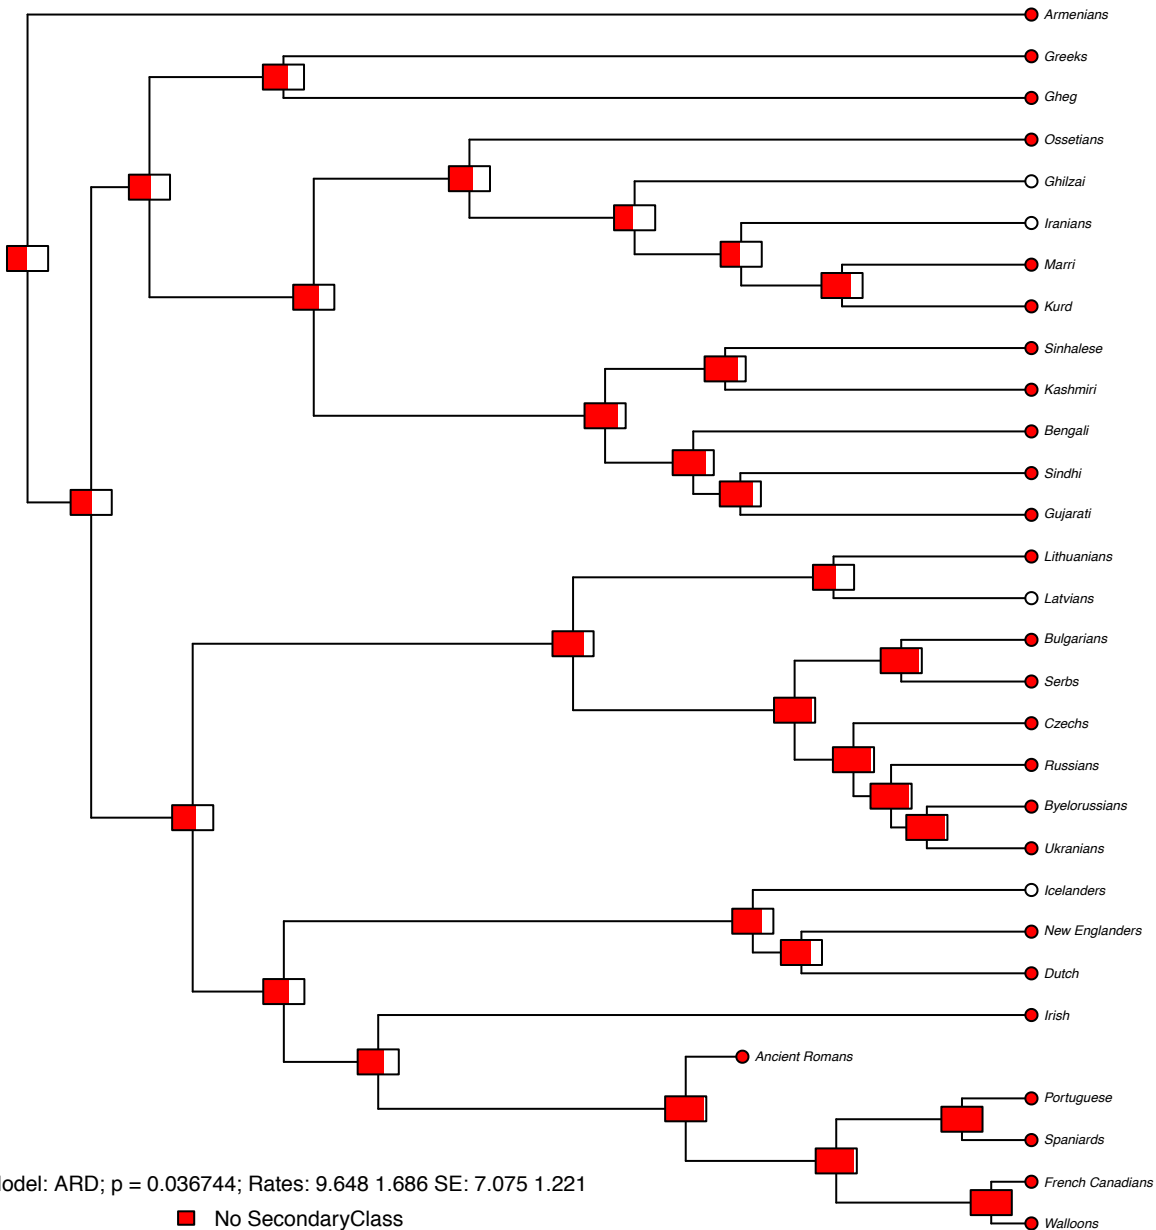

- Armenians
- Greeks
- Ghag
- Ossetians
- Ghilzai
- Iranians
- Marri
- Kurd
- Sinhalese
- Kashmiri
- Bengali
- Sindhi
- Gujarati
- Lithuanians
- Latvians
- Bulgarians
- Serbs
- Czechs
- Russians
- Byelorussians
- Ukrainians
- Icelanders
- New Englanders
- Dutch
- Irish
- Ancient Romans
- Portuguese
- Spaniards
- French Canadians
- Walloons

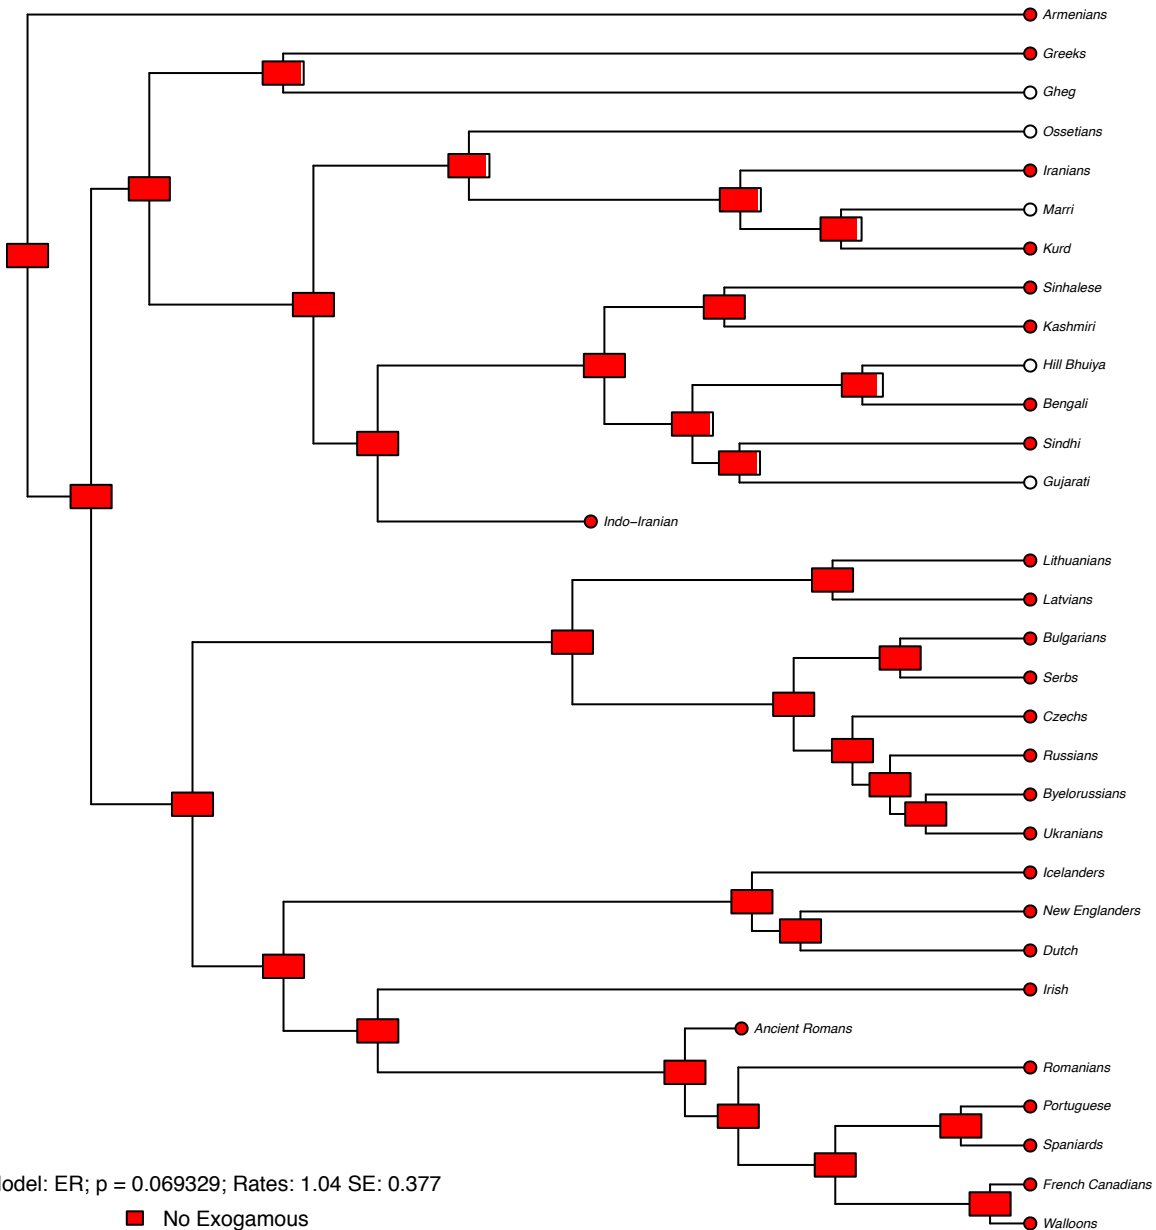

- Armenians
- Greeks
- Ghag
- Ossetians
- Iranians
- Marri
- Kurd
- Sinhalese
- Kashmiri
- Hill Bhuiya
- Bengali
- Sindhi
- Gujarati
- Indo-Iranian
- Lithuanians
- Latvians
- Bulgarians
- Serbs
- Czechs
- Russians
- Byelorussians
- Ukrainians
- Icelanders
- New Englanders
- Dutch
- Irish
- Ancient Romans
- Romanians
- Portuguese
- Spaniards
- French Canadians
- Walloons

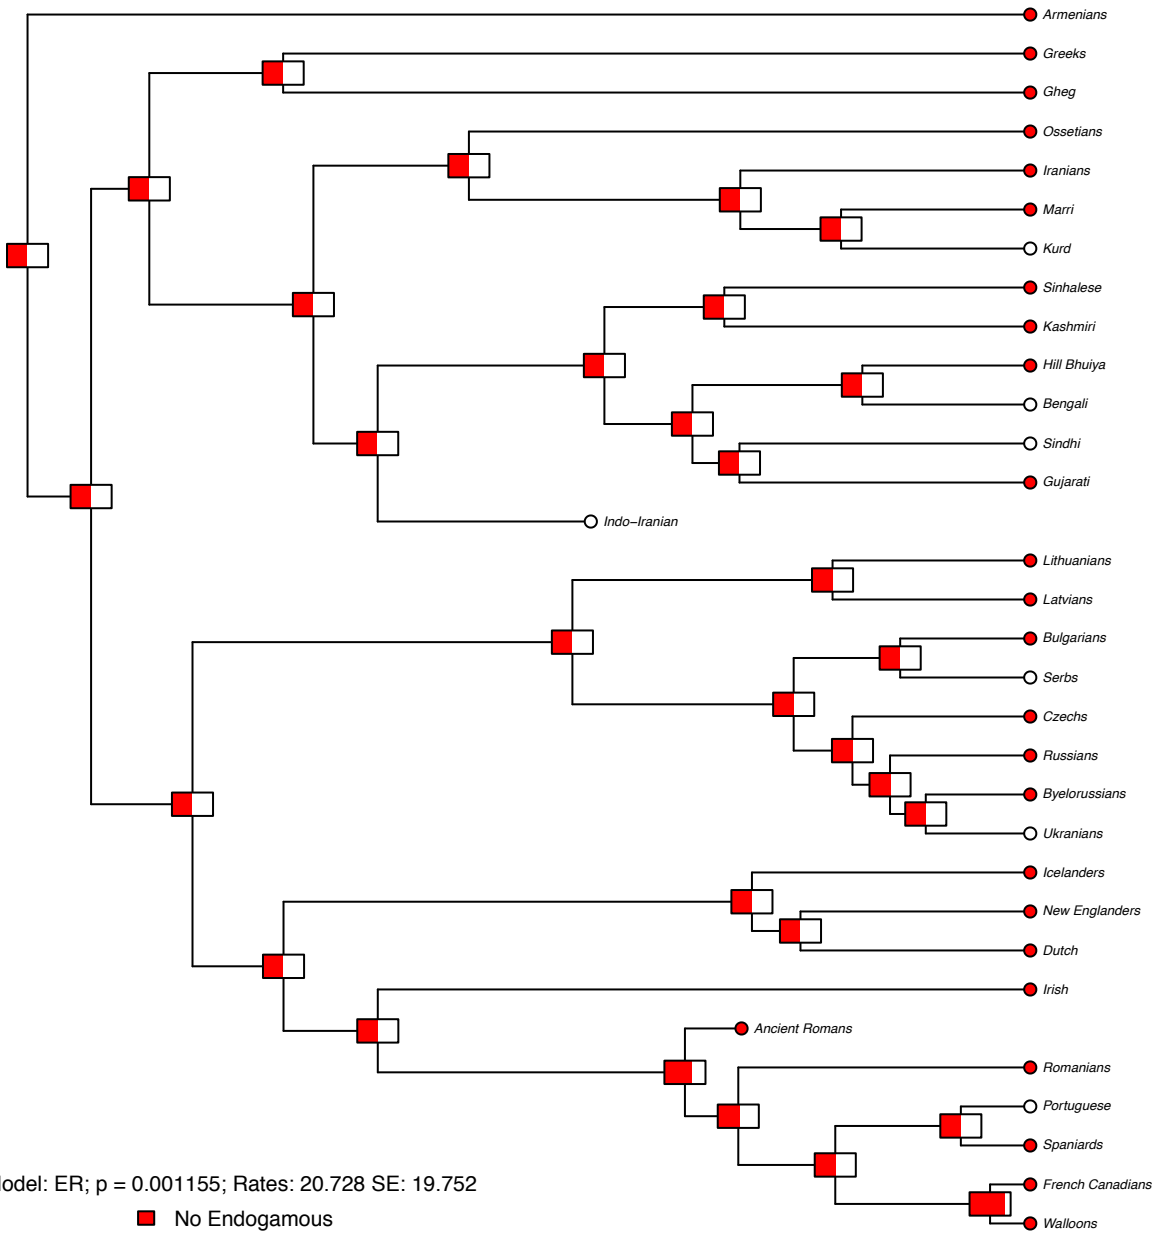

Model: ER;  $p = 0.001155$ ; Rates: 20.728 SE: 19.752

■ No Endogamous  
 □ Endogamous

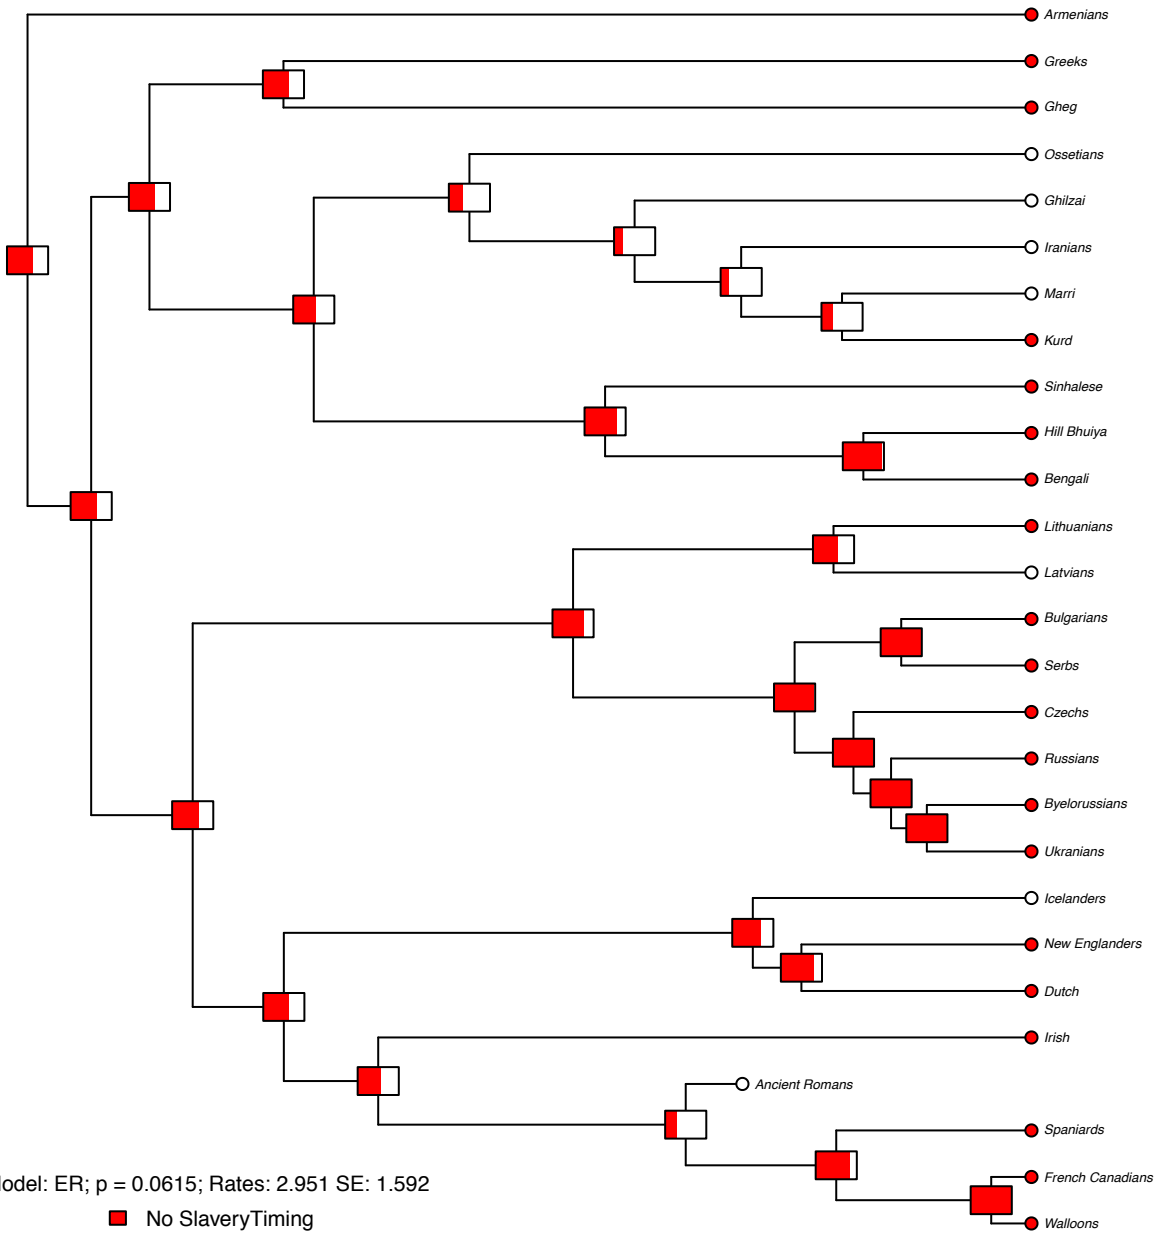

Model: ER;  $p = 0.0615$ ; Rates: 2.951 SE: 1.592

- No SlaveryTiming
- SlaveryTiming

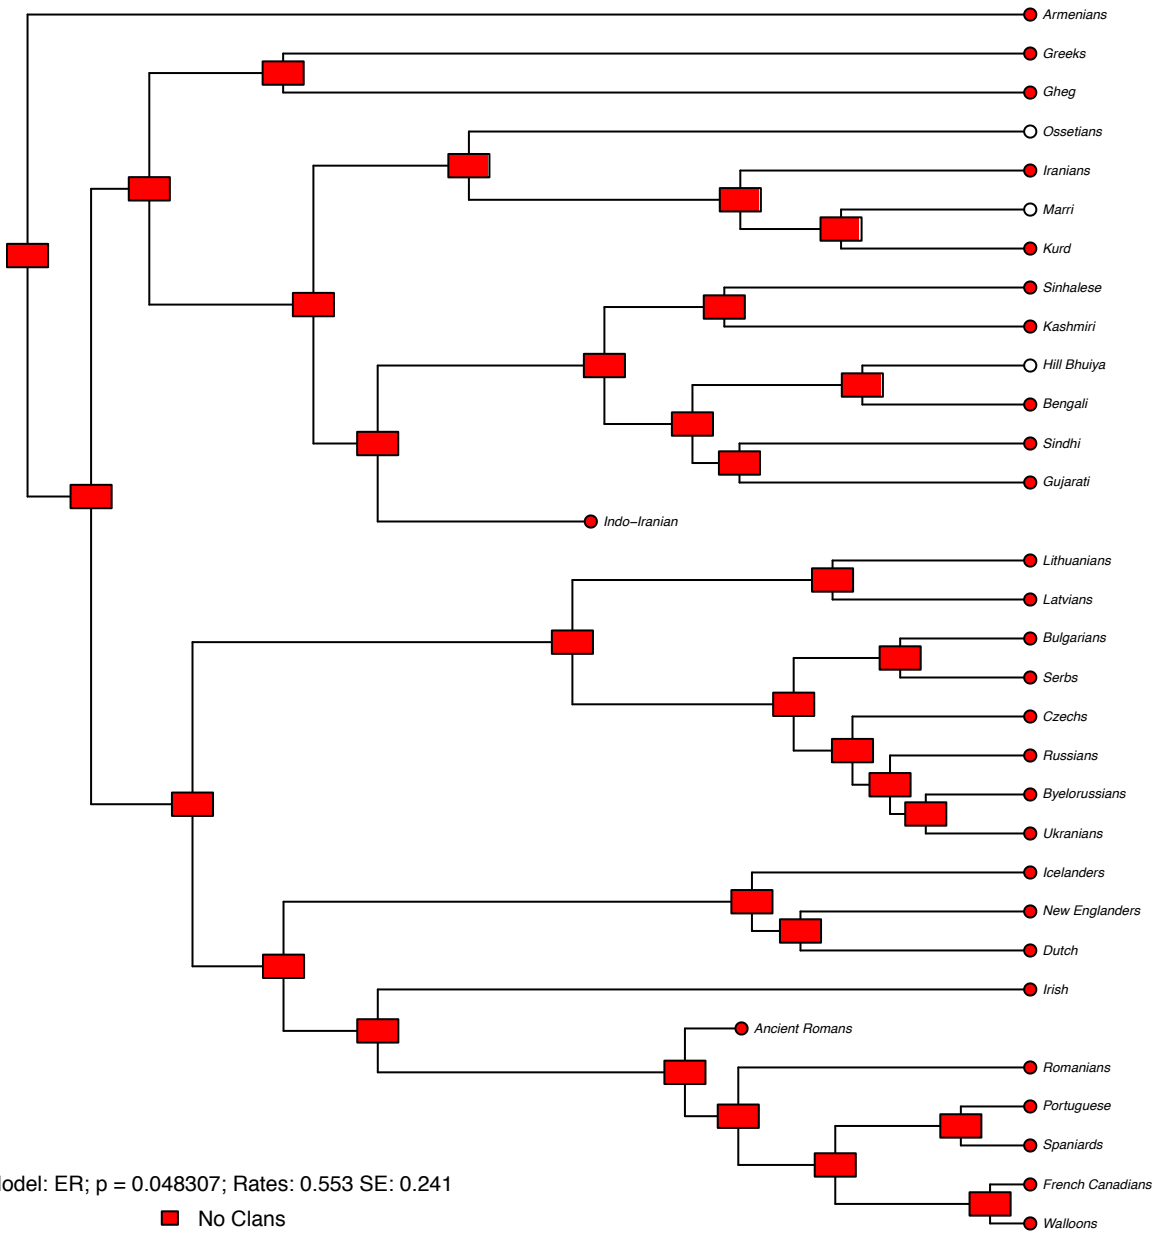

Model: ER;  $p = 0.048307$ ; Rates: 0.553 SE: 0.241

- No Clans
- Clans



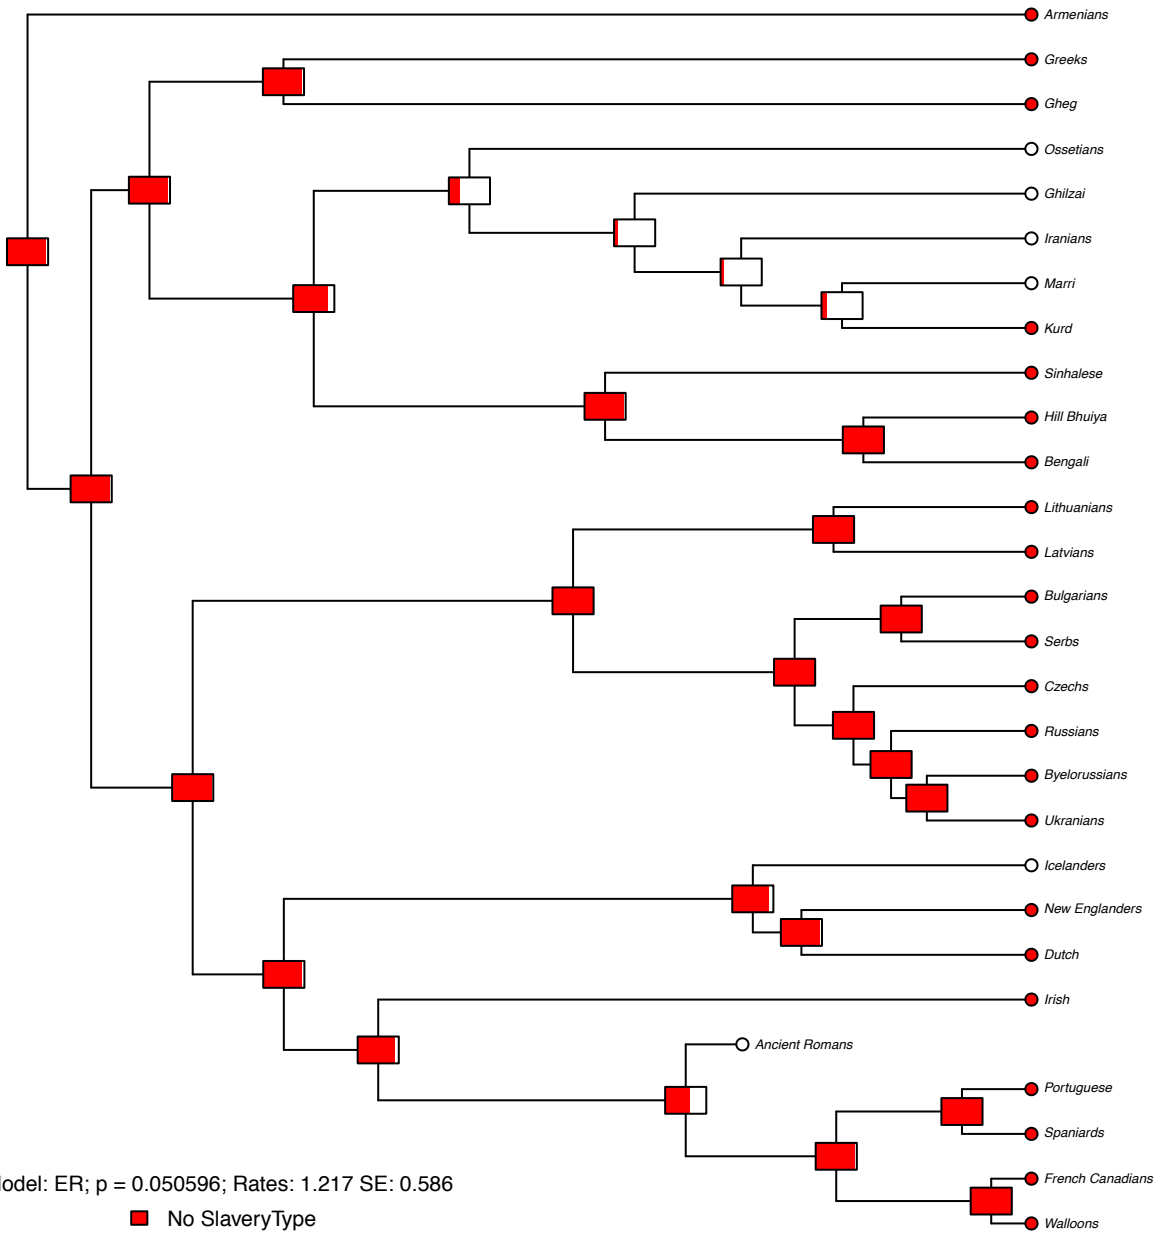

Model: ER;  $p = 0.050596$ ; Rates: 1.217 SE: 0.586

■ No SlaveryType  
 SlaveryType

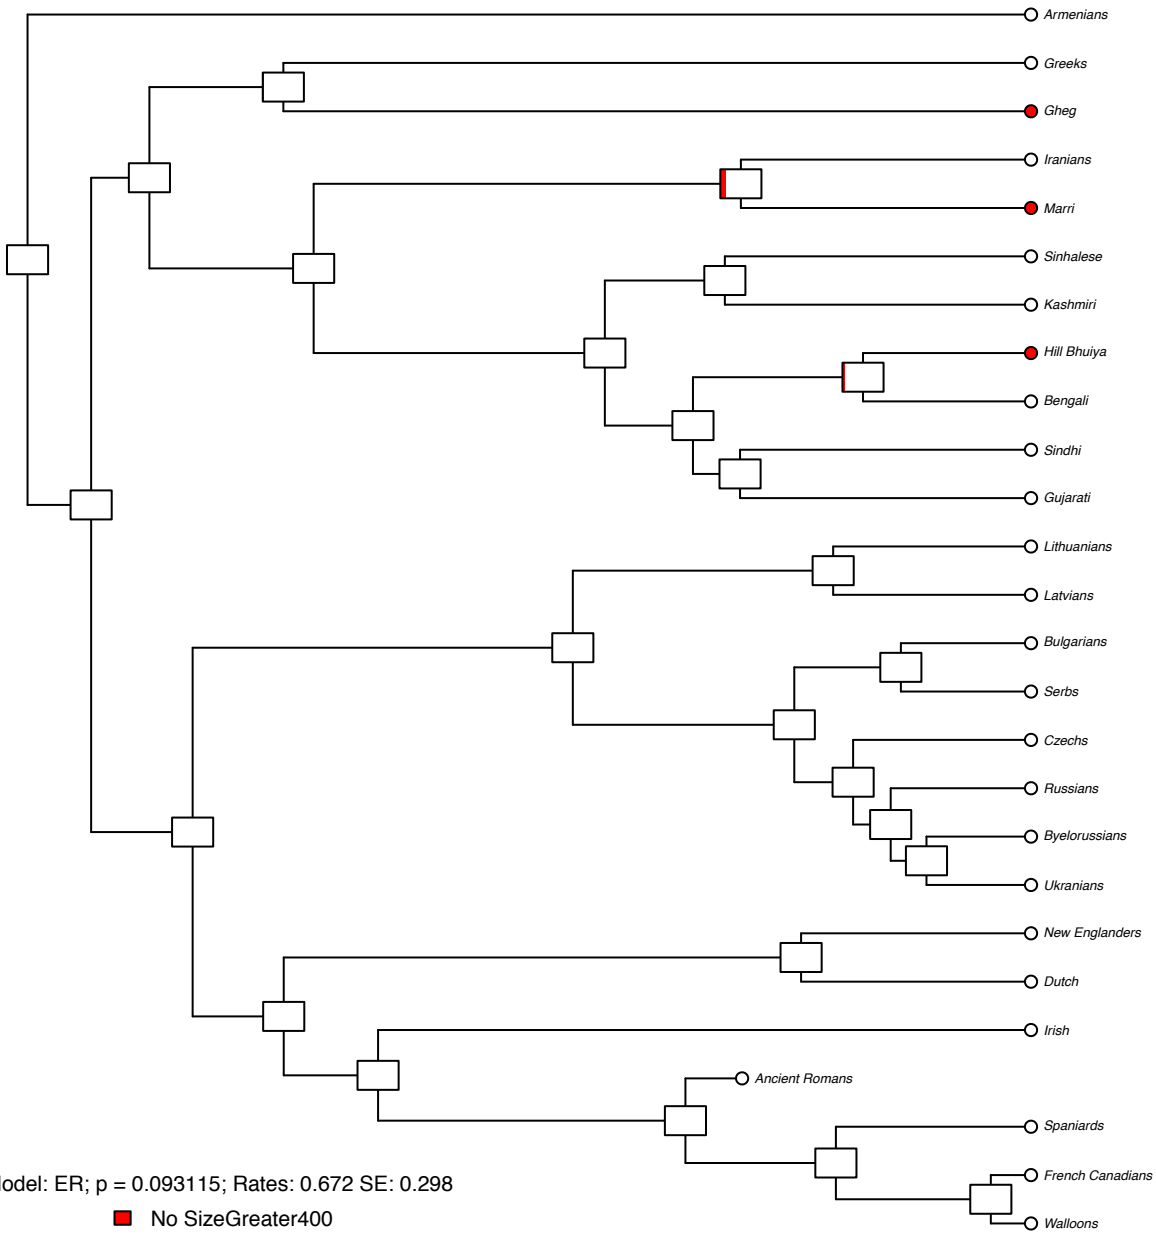

Model: ER;  $p = 0.093115$ ; Rates: 0.672 SE: 0.298

■ No SizeGreater400  
 SizeGreater400

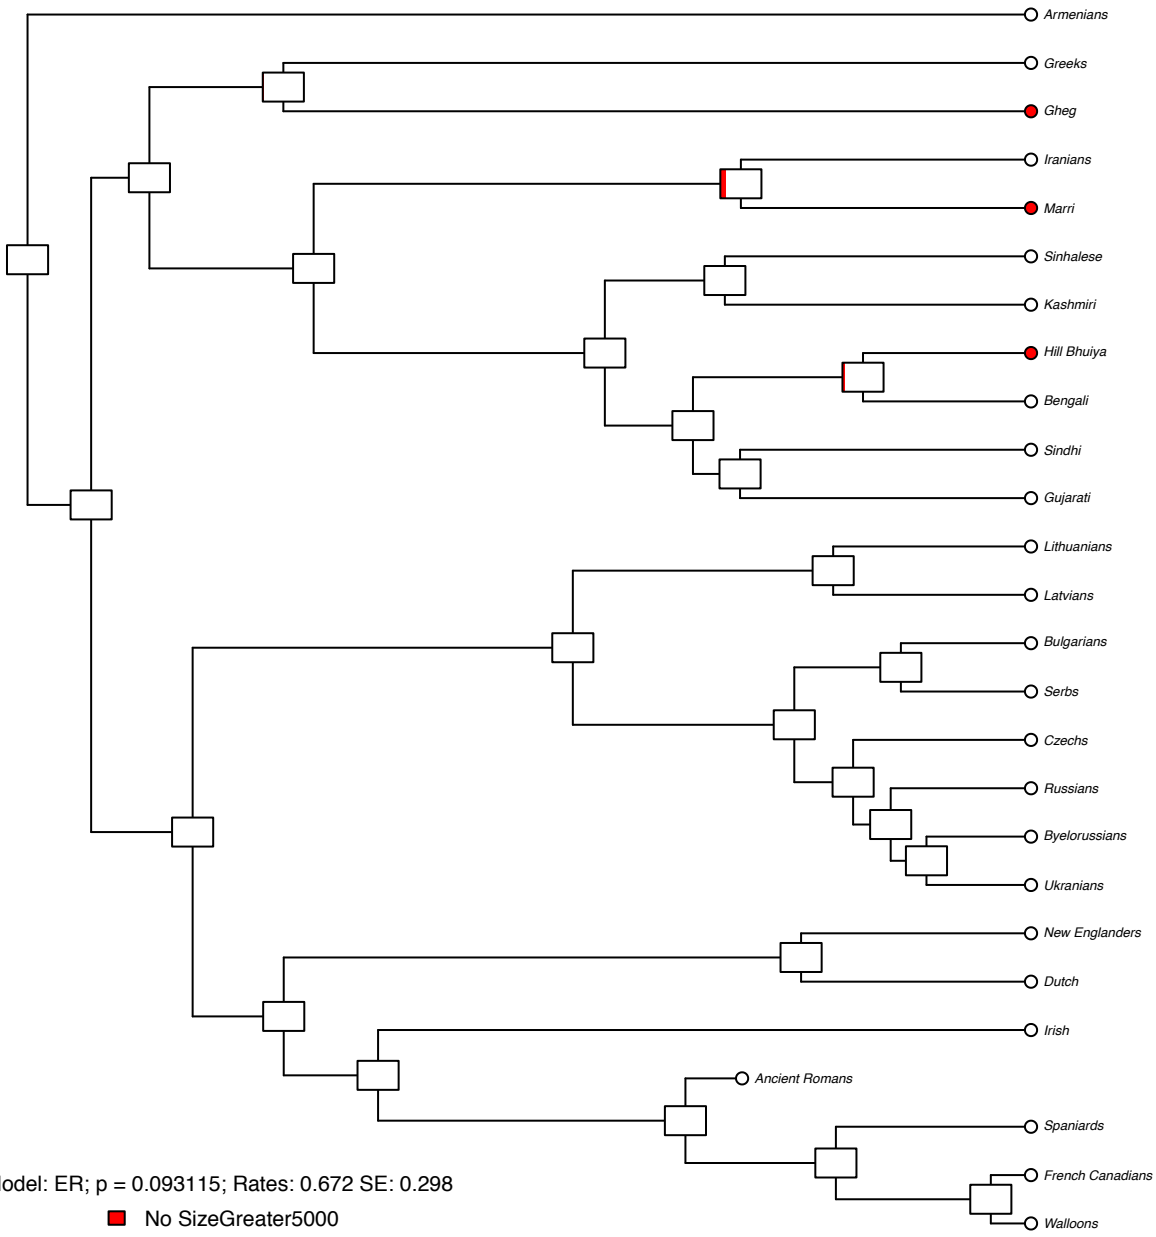

○ Armenians  
 ○ Greeks  
● Ghag  
 ○ Iranians  
● Marri  
 ○ Sinhalese  
 ○ Kashmiri  
● Hill Bhuiya  
 ○ Bengali  
 ○ Sindhi  
 ○ Gujarati  
 ○ Lithuanians  
 ○ Latvians  
 ○ Bulgarians  
 ○ Serbs  
 ○ Czechs  
 ○ Russians  
 ○ Byelorussians  
 ○ Ukrainians  
 ○ New Englanders  
 ○ Dutch  
 ○ Irish  
 ○ Ancient Romans  
 ○ Spaniards  
 ○ French Canadians  
 ○ Wallons

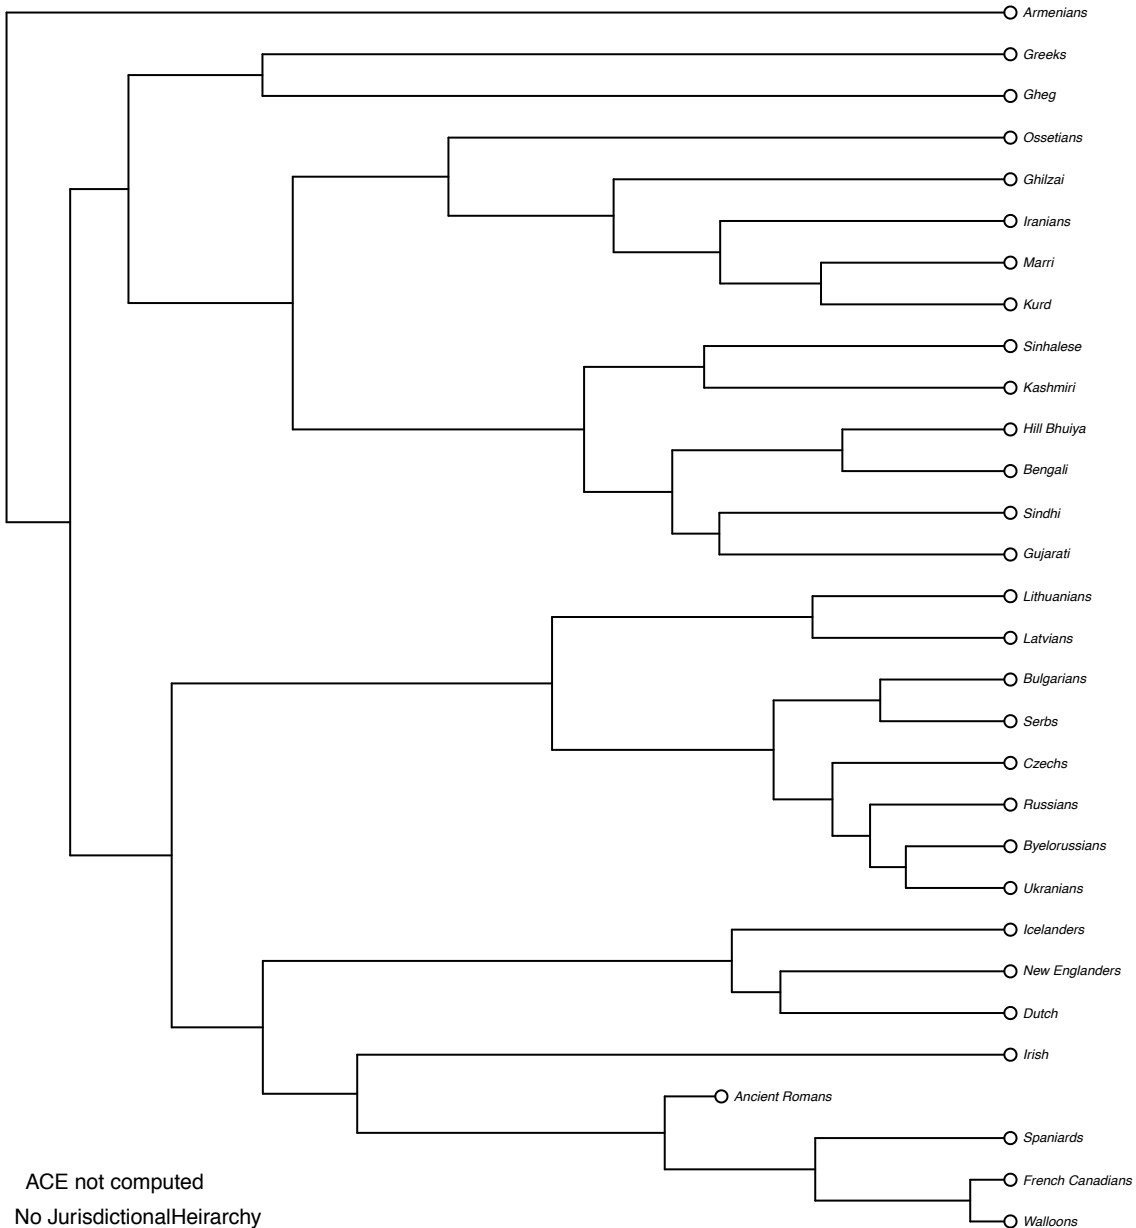

○ Armenians

○ Greeks

○ Ghag

○ Ossetians

○ Ghilzai

○ Iranians

○ Marri

○ Kurd

○ Sinhalese

○ Kashmiri

○ Hill Bhuiya

○ Bengali

○ Sindhi

○ Gujarati

○ Lithuanians

○ Latvians

○ Bulgarians

○ Serbs

○ Czechs

○ Russians

○ Byelorussians

○ Ukrainians

○ Icelanders

○ New Englanders

○ Dutch

○ Irish

○ Ancient Romans

○ Spaniards

○ French Canadians

○ Walloons

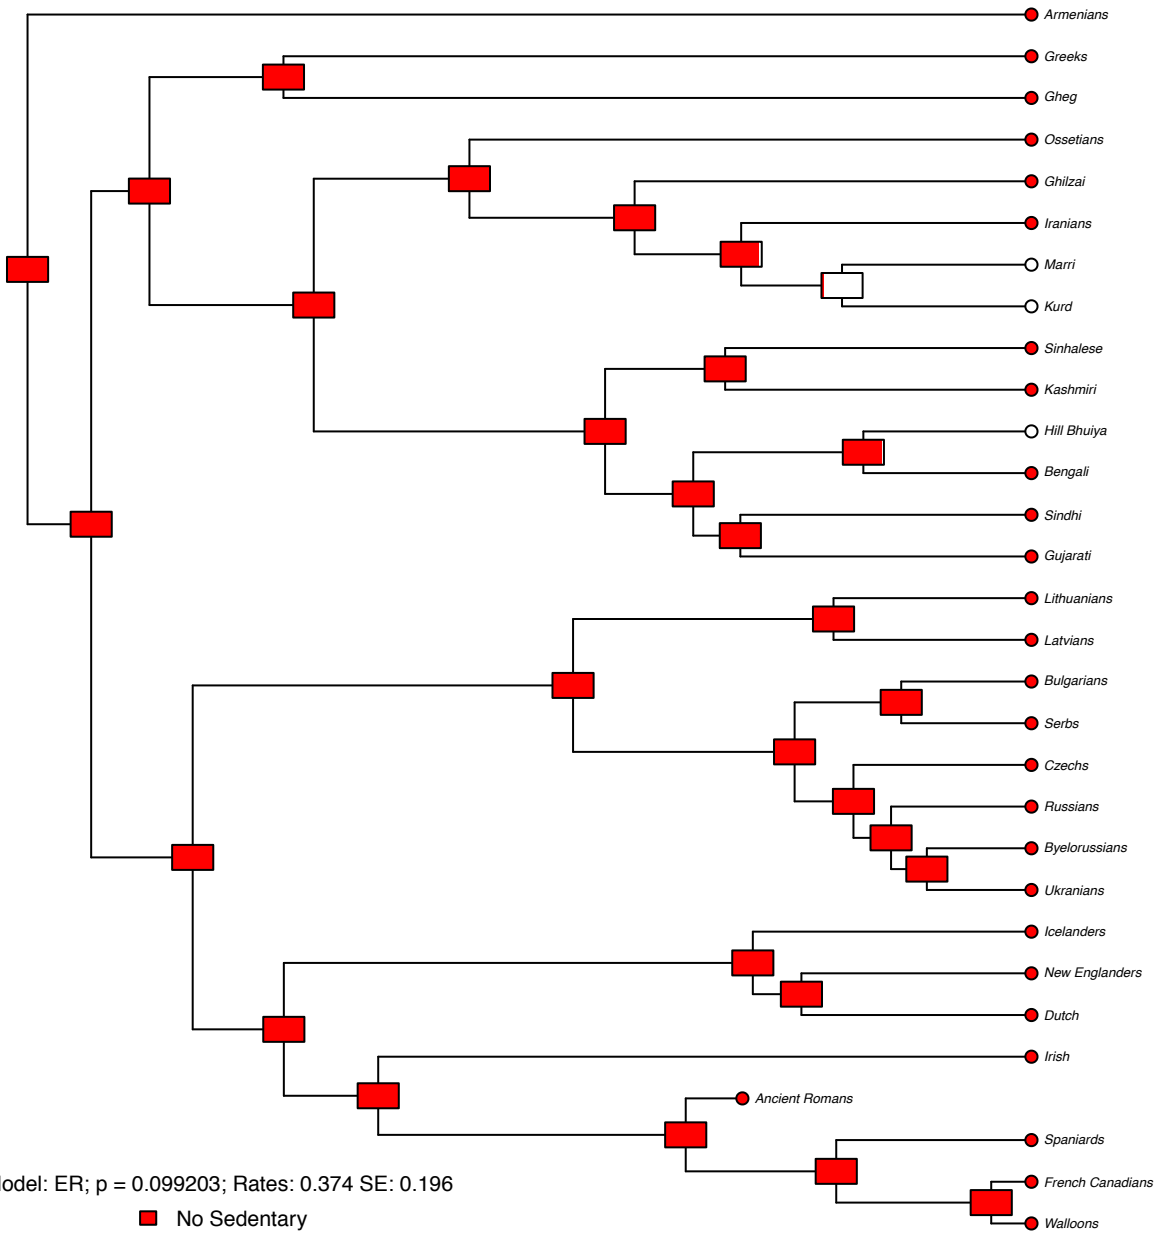

- Armenians
- Greeks
- Ghag
- Ossetians
- Ghilzai
- Iranians
- Marri
- Kurd
- Sinhalese
- Kashmiri
- Hill Bhuiya
- Bengali
- Sindhi
- Gujarati
- Lithuanians
- Latvians
- Bulgarians
- Serbs
- Czechs
- Russians
- Byelorussians
- Ukrainians
- Icelanders
- New Englanders
- Dutch
- Irish
- Ancient Romans
- Spaniards
- French Canadians
- Walloons

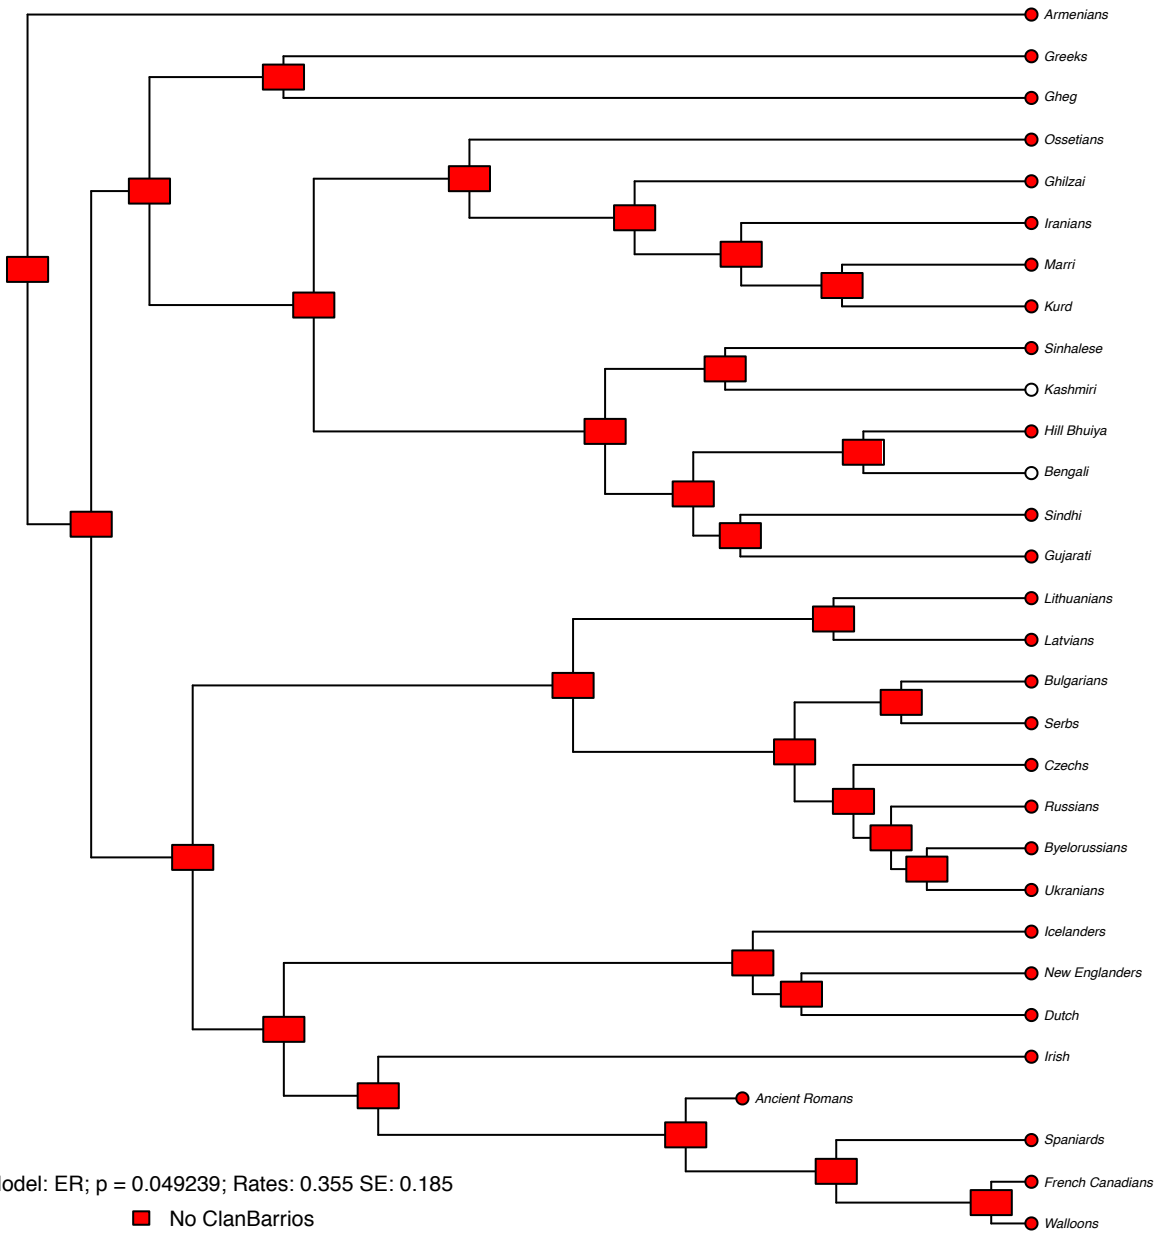

Model: ER;  $p = 0.049239$ ; Rates: 0.355 SE: 0.185

- No ClanBarrios
- ClanBarrios

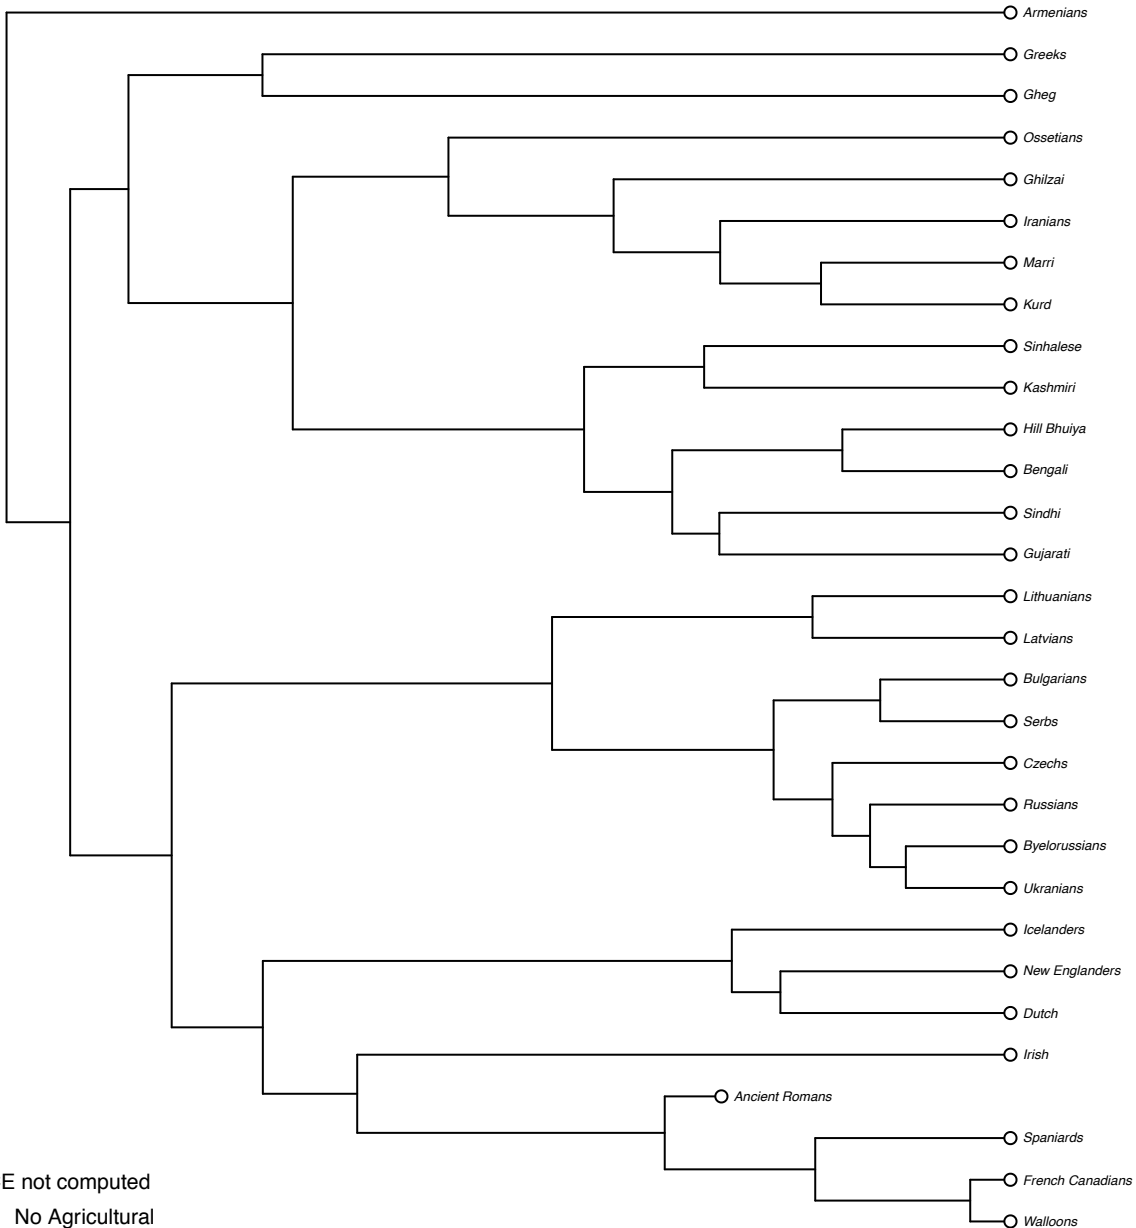

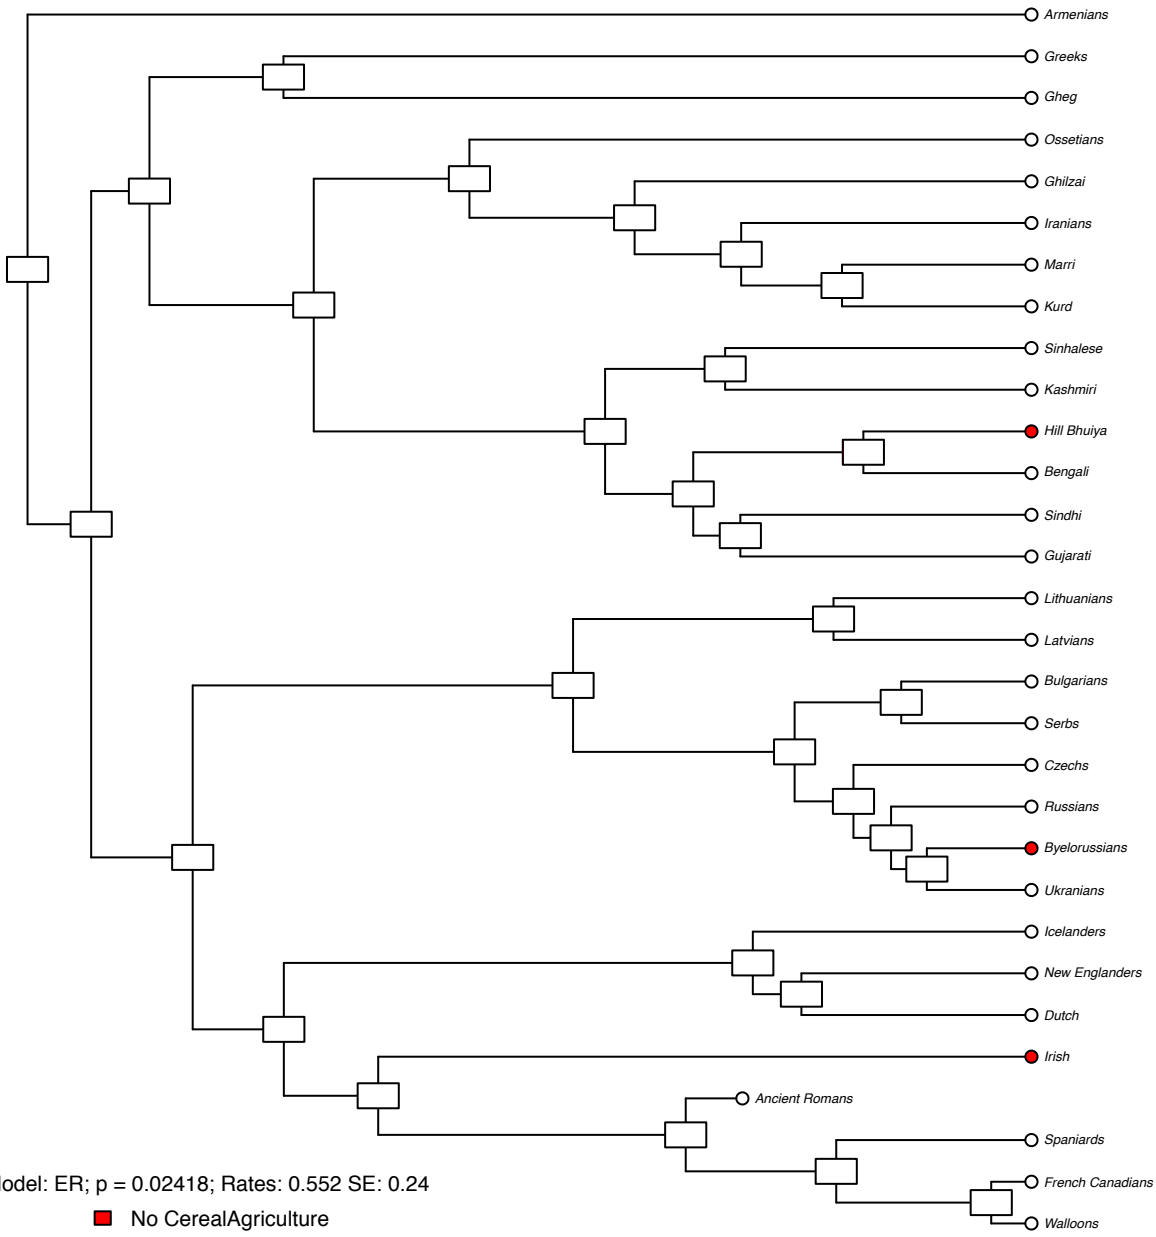

Model: ER;  $p = 0.02418$ ; Rates: 0.552 SE: 0.24

- No CerealAgriculture
- CerealAgriculture



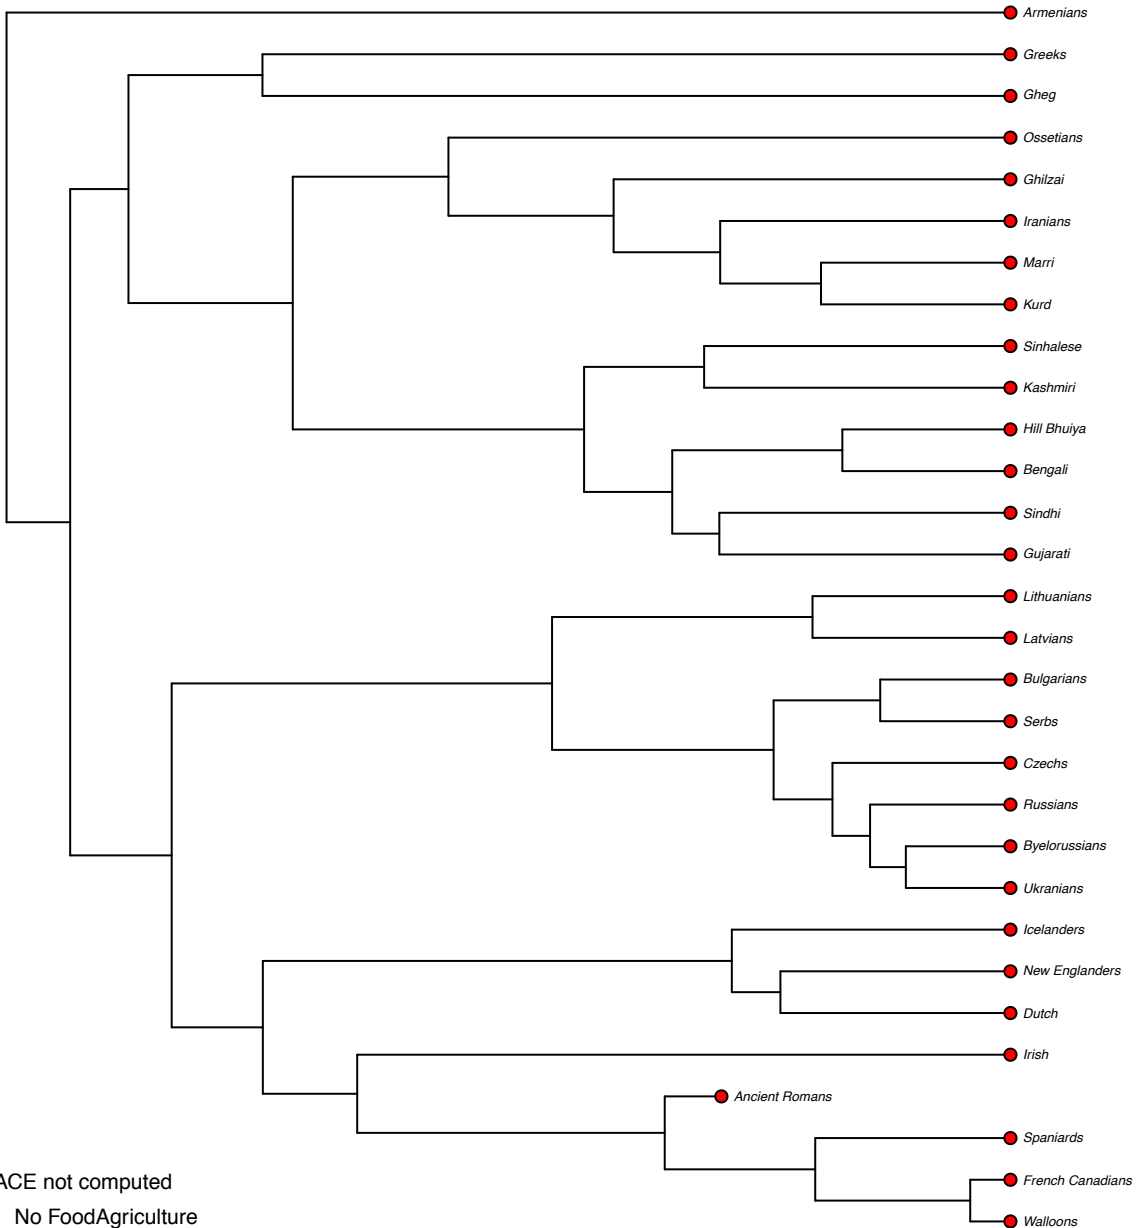

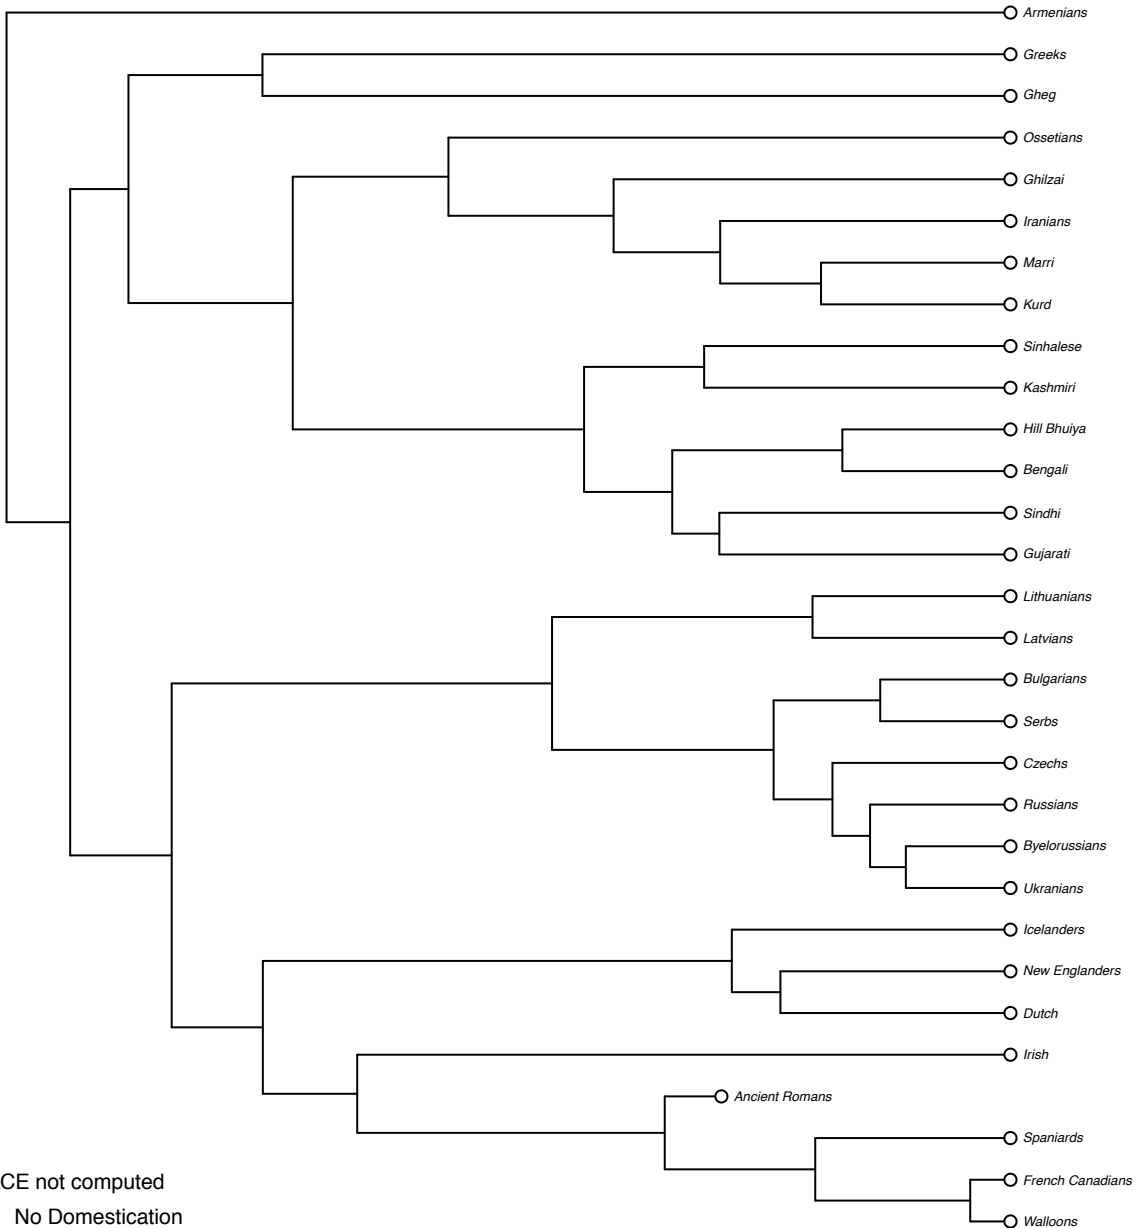

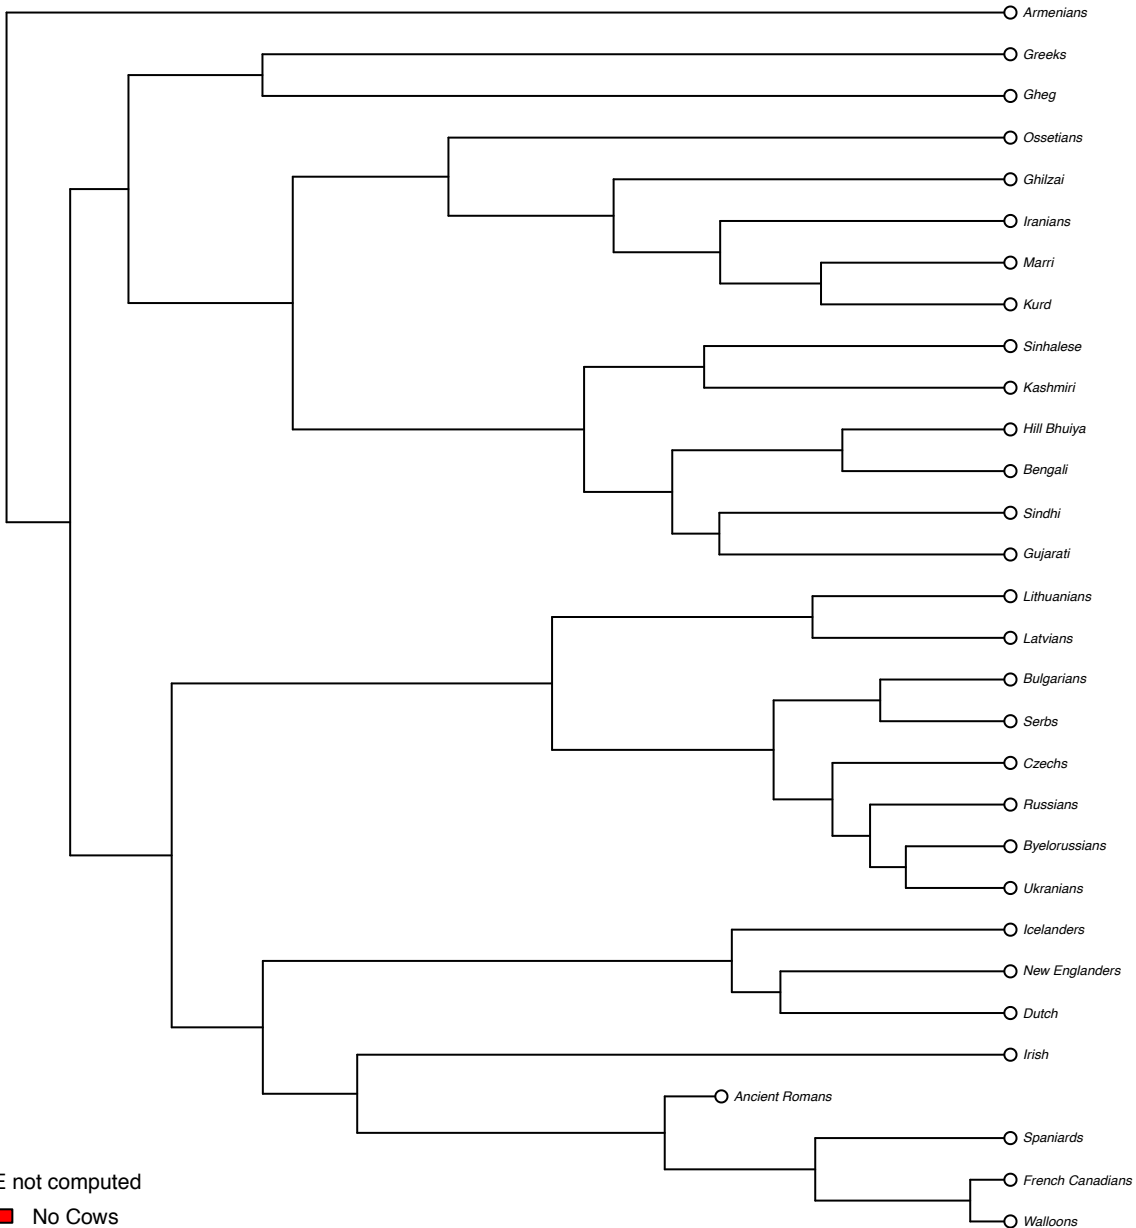

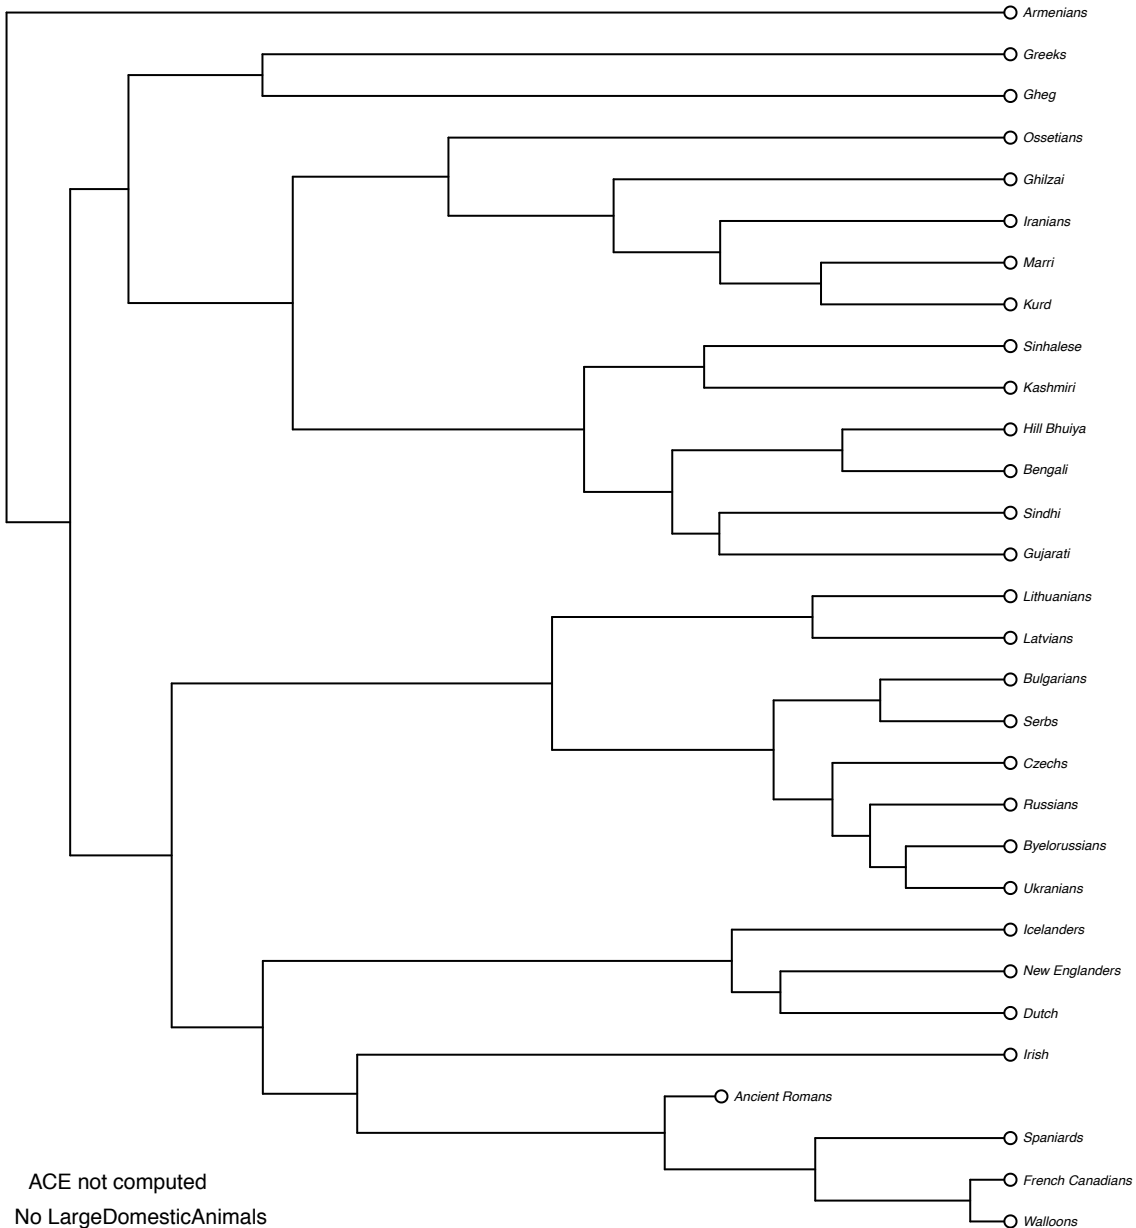

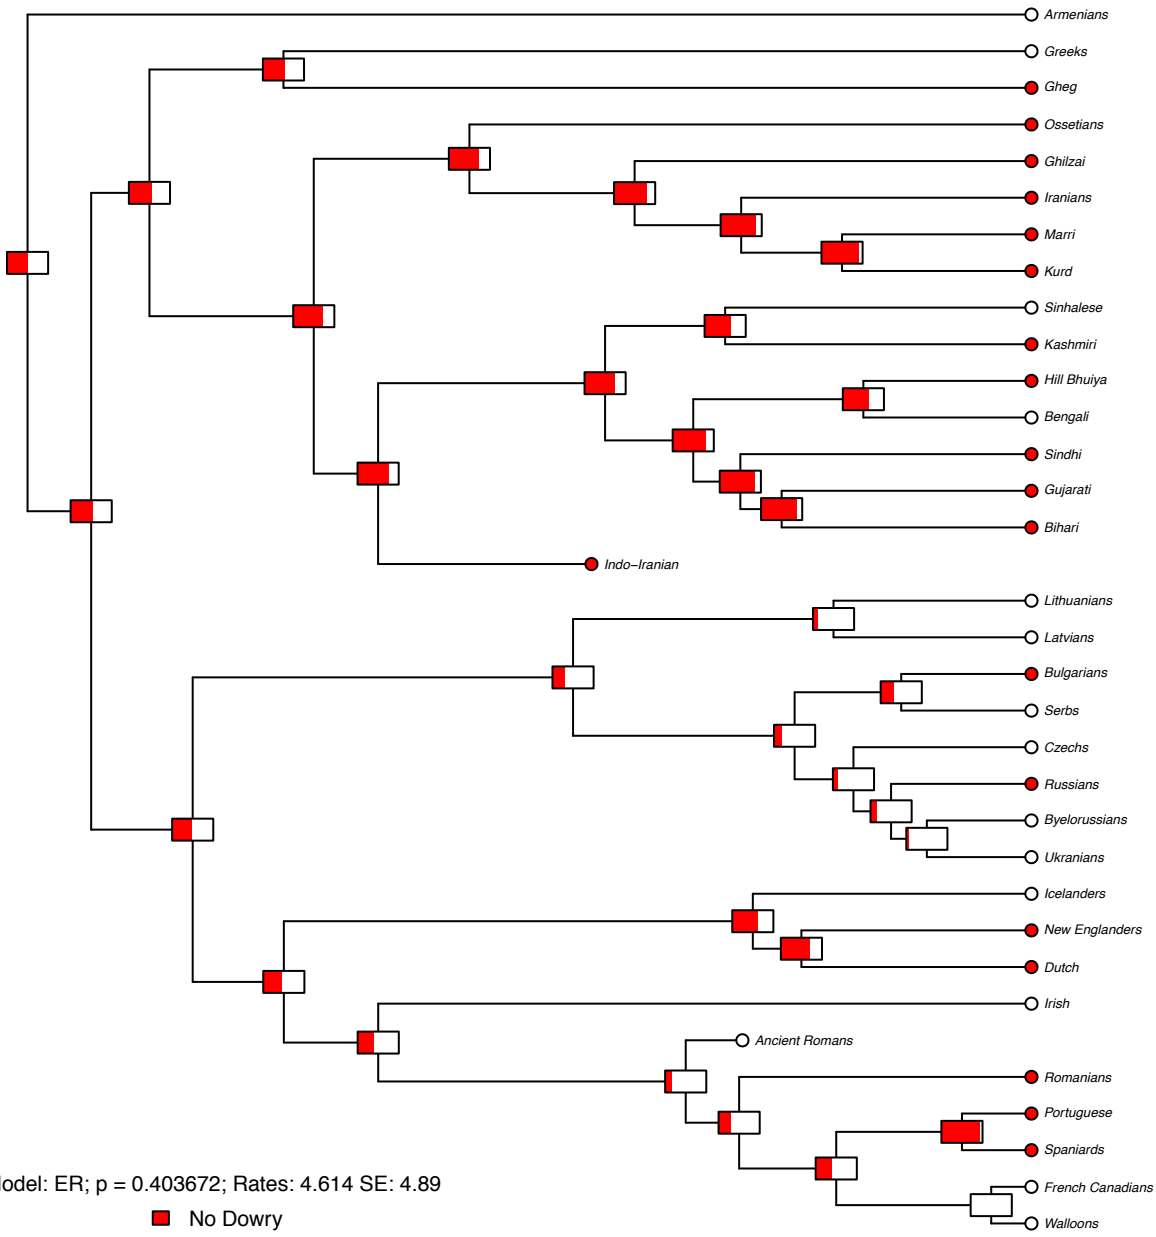

- Armenians
- Greeks
- Gheg
- Ossetians
- Ghilzai
- Iranians
- Marri
- Kurd
- Sinhalese
- Kashmiri
- Hill Bhuiya
- Bengali
- Sindhi
- Gujarati
- Bihari
- Indo-Iranian
- Lithuanians
- Latvians
- Bulgarians
- Serbs
- Czechs
- Russians
- Byelorussians
- Ukrainians
- Icelanders
- New Englanders
- Dutch
- Irish
- Ancient Romans
- Romanians
- Portuguese
- Spaniards
- French Canadians
- Walloons

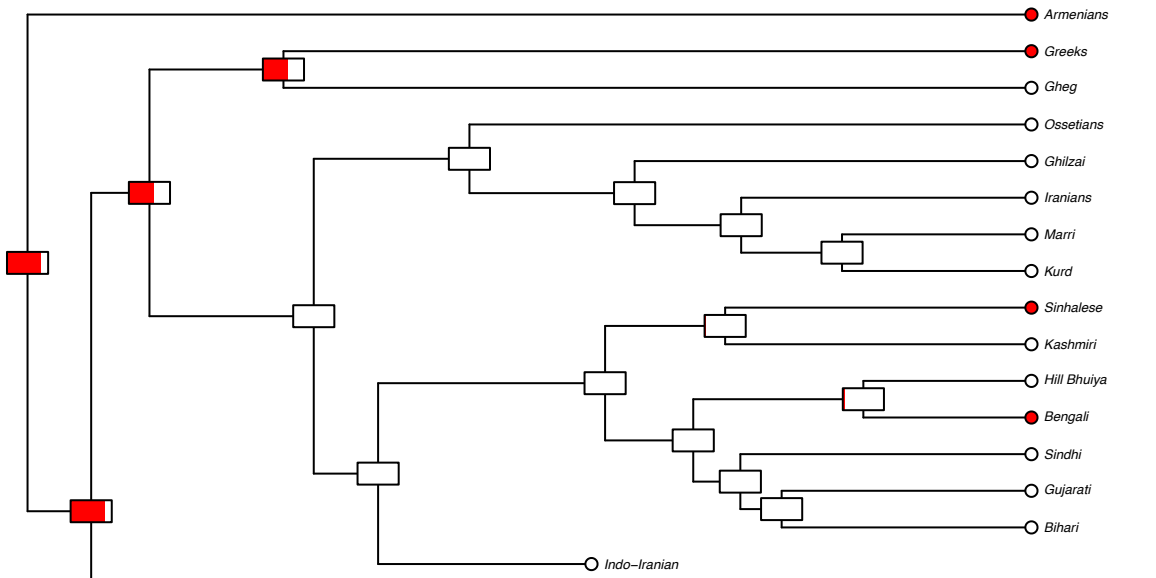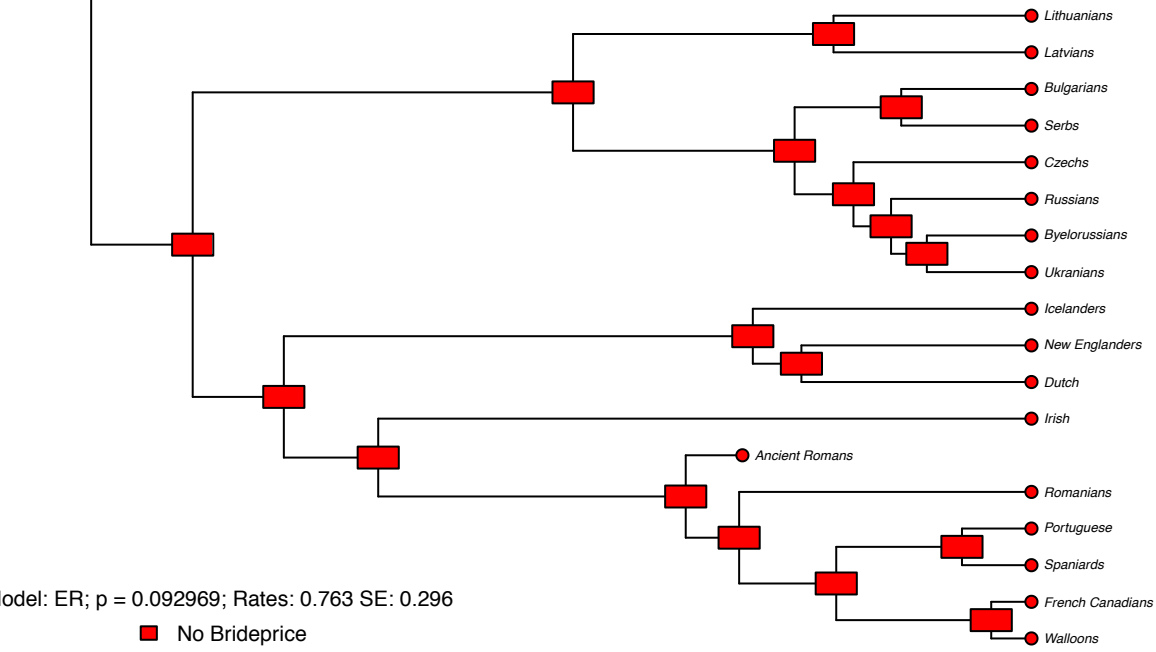

Model: ER;  $p = 0.092969$ ; Rates: 0.763 SE: 0.296

No Brideprice  
 Brideprice

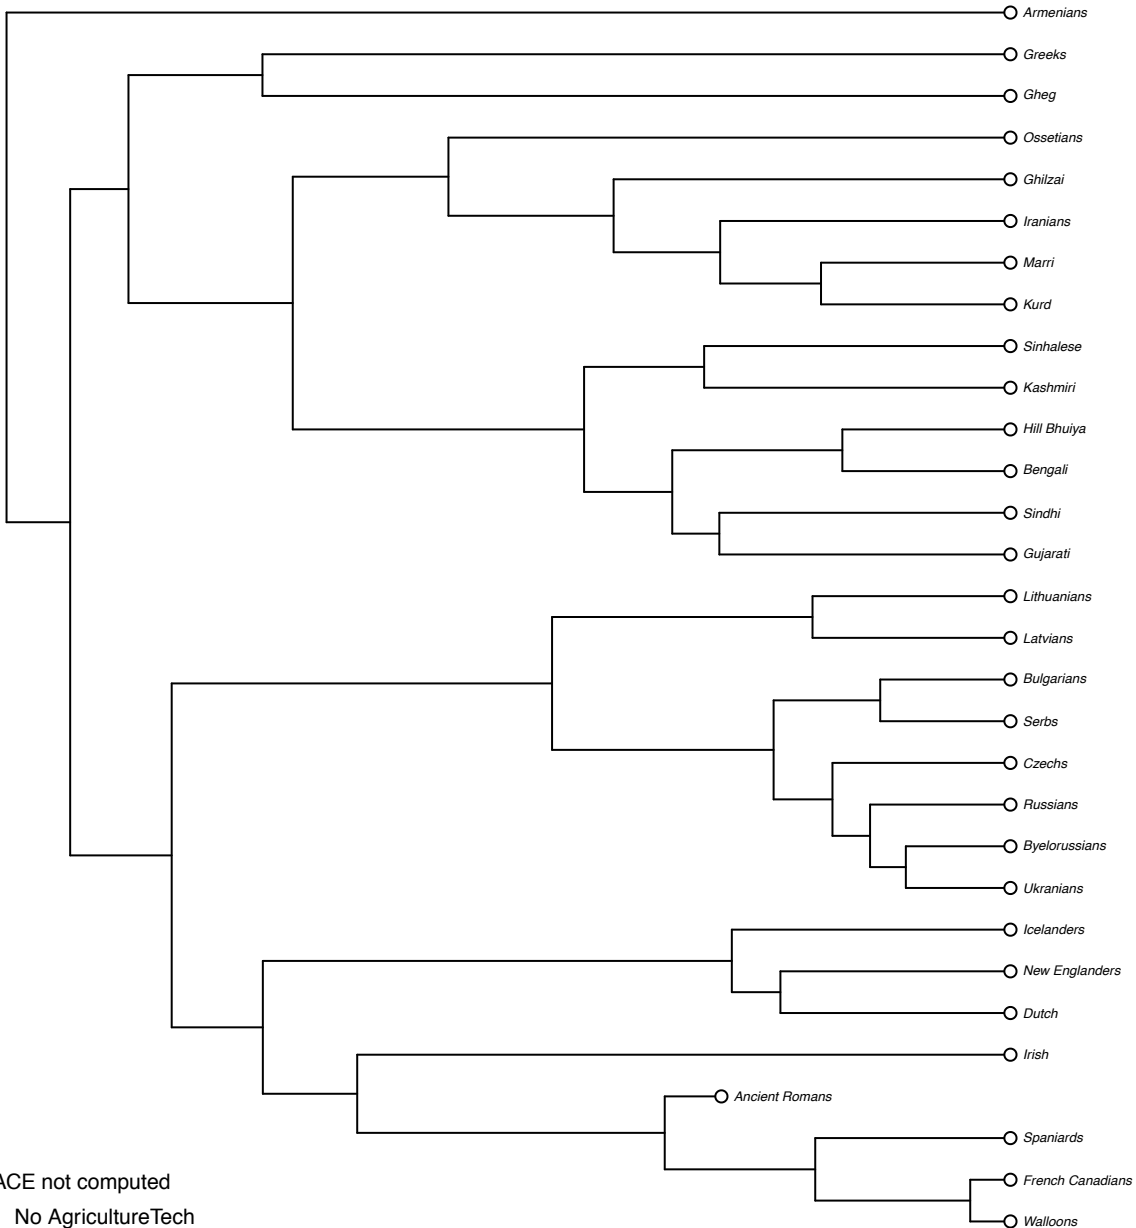

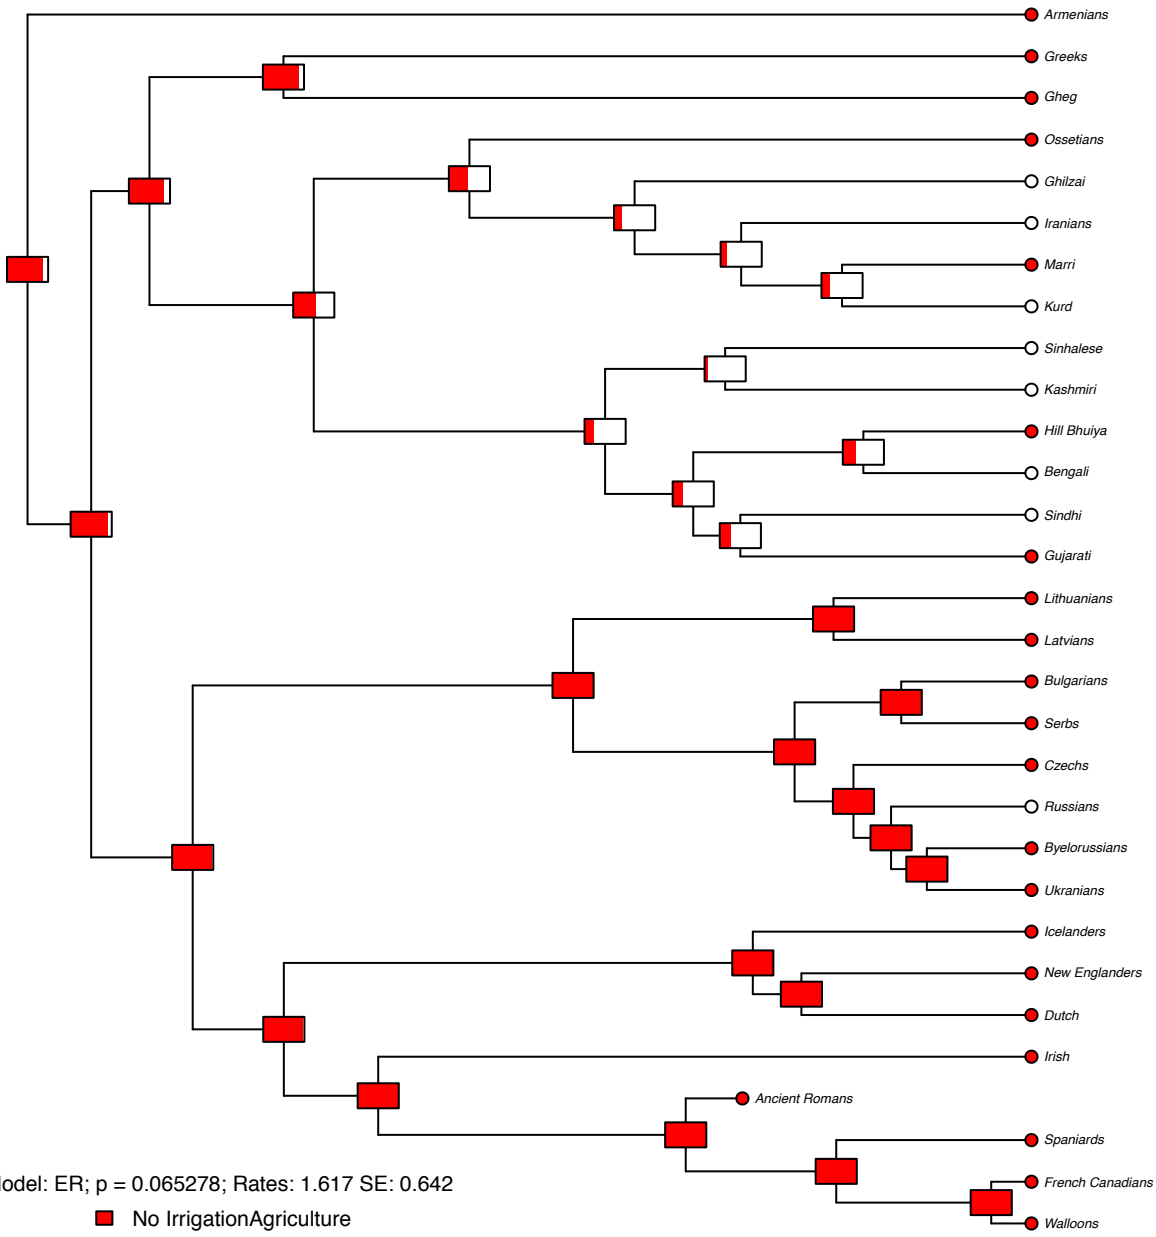

Model: ER;  $p = 0.065278$ ; Rates: 1.617 SE: 0.642

- No IrrigationAgriculture
- IrrigationAgriculture



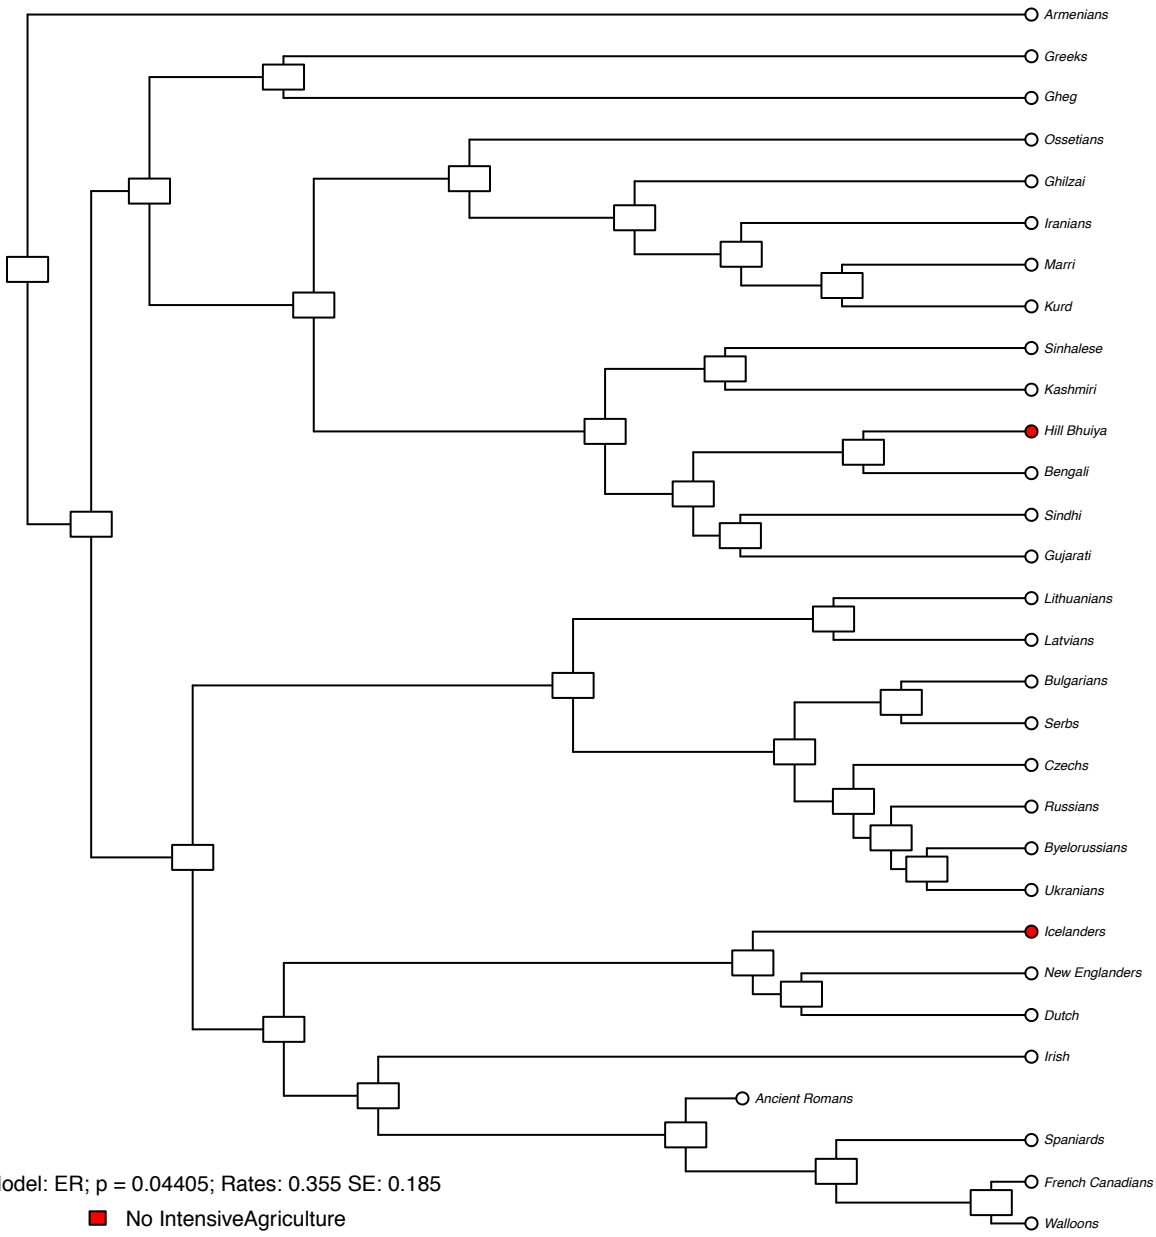

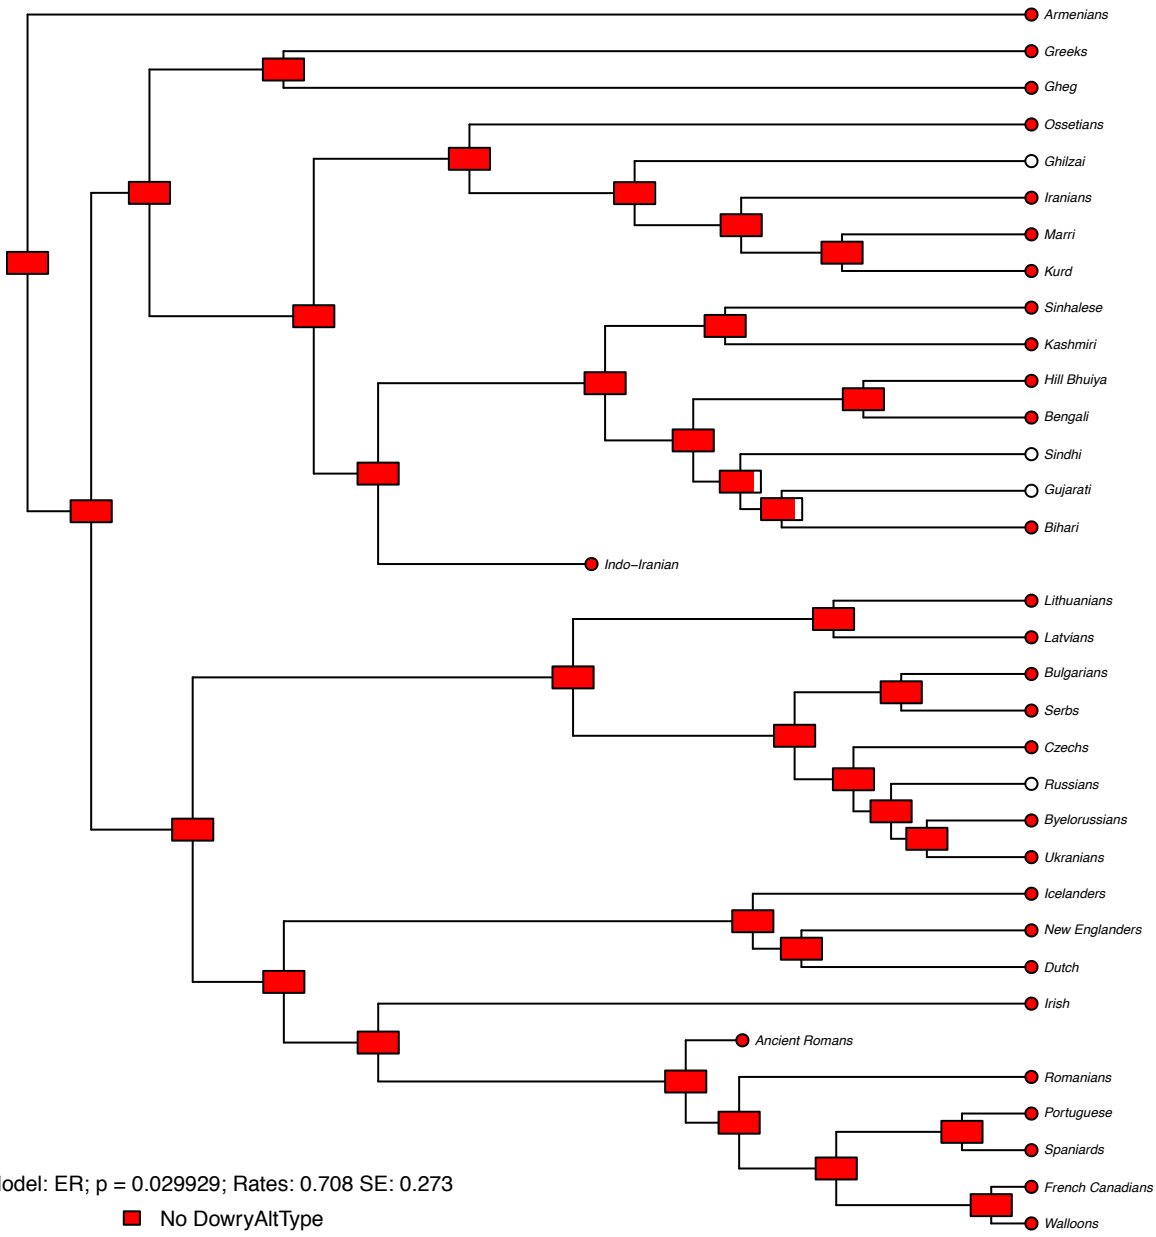

Model: ER;  $p = 0.029929$ ; Rates: 0.708 SE: 0.273

■ No DowryAltType  
 DowryAltType

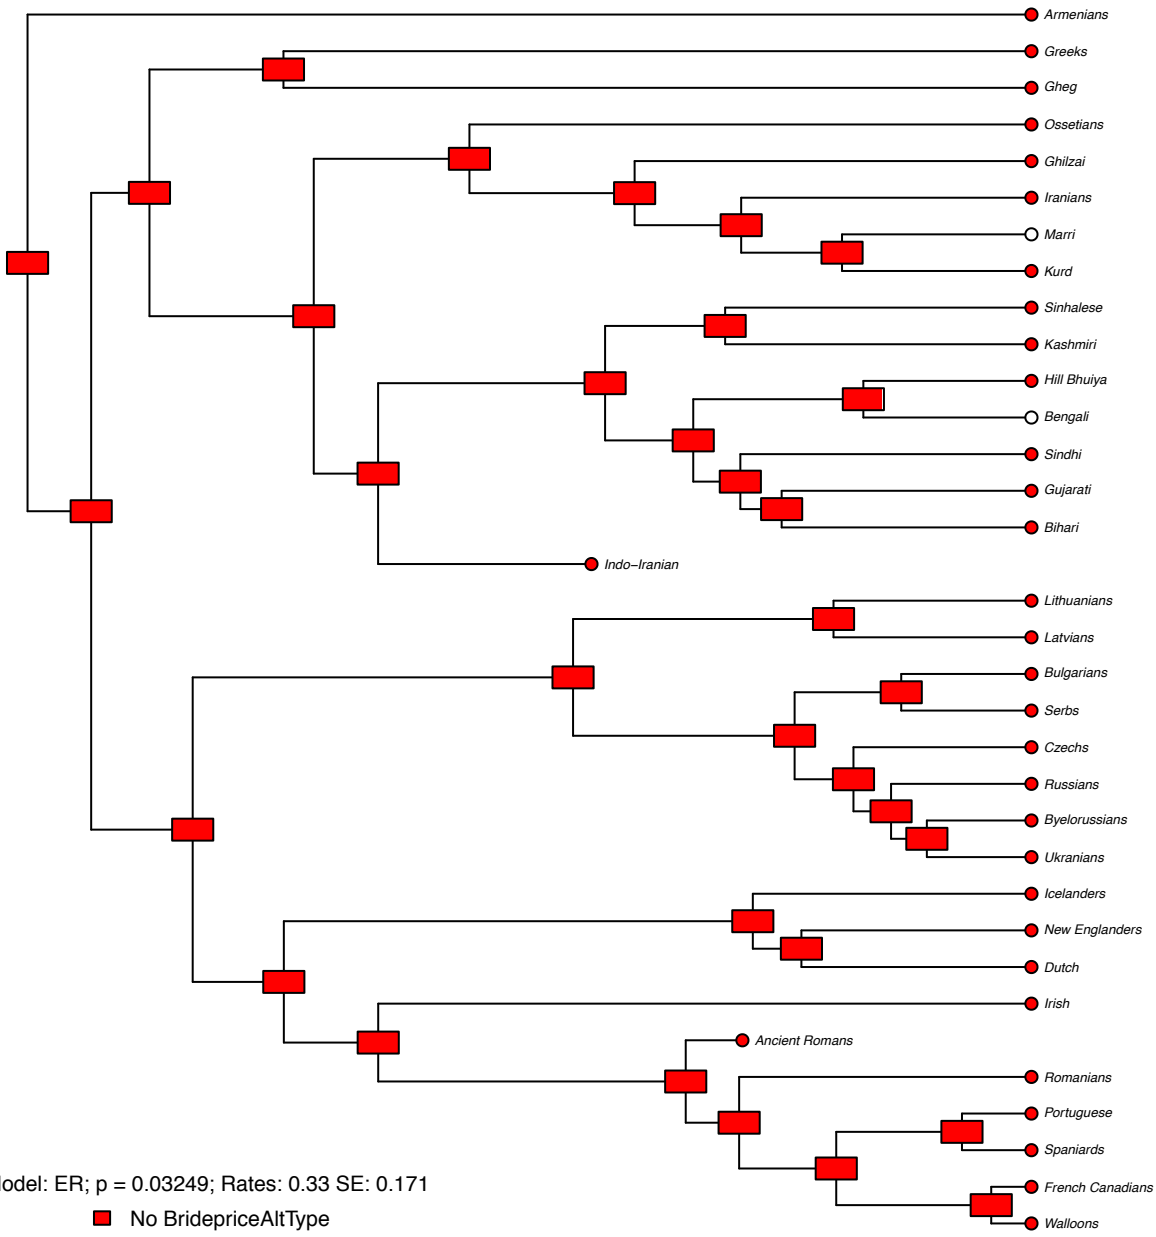

Model: ER;  $p = 0.03249$ ; Rates: 0.33 SE: 0.171

- No BridepriceAltType
- BridepriceAltType

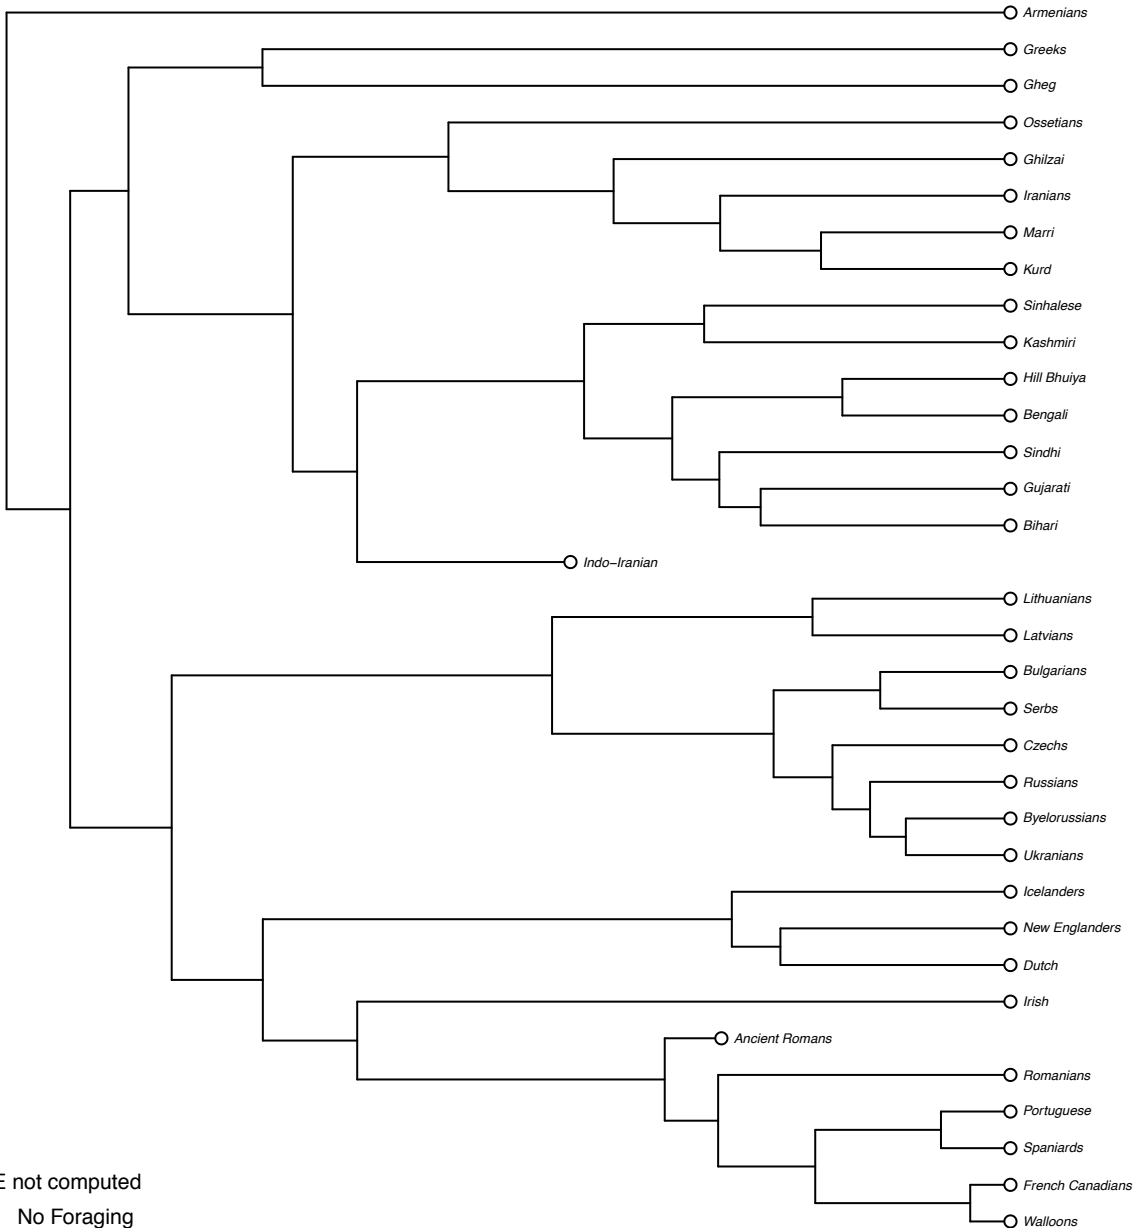

ACE not computed

- No Foraging
- Foraging

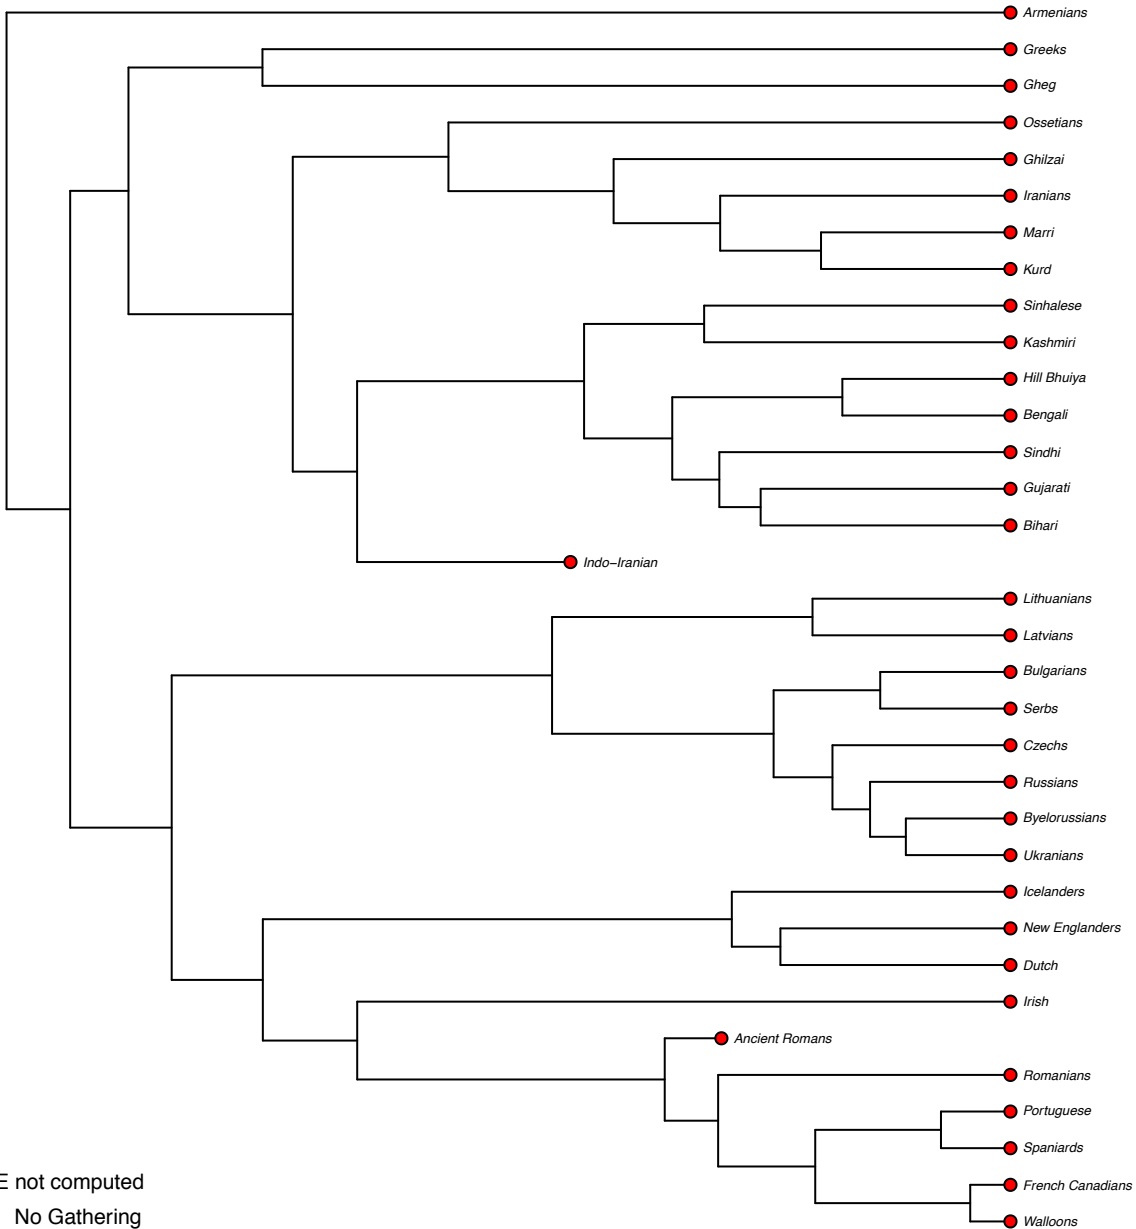

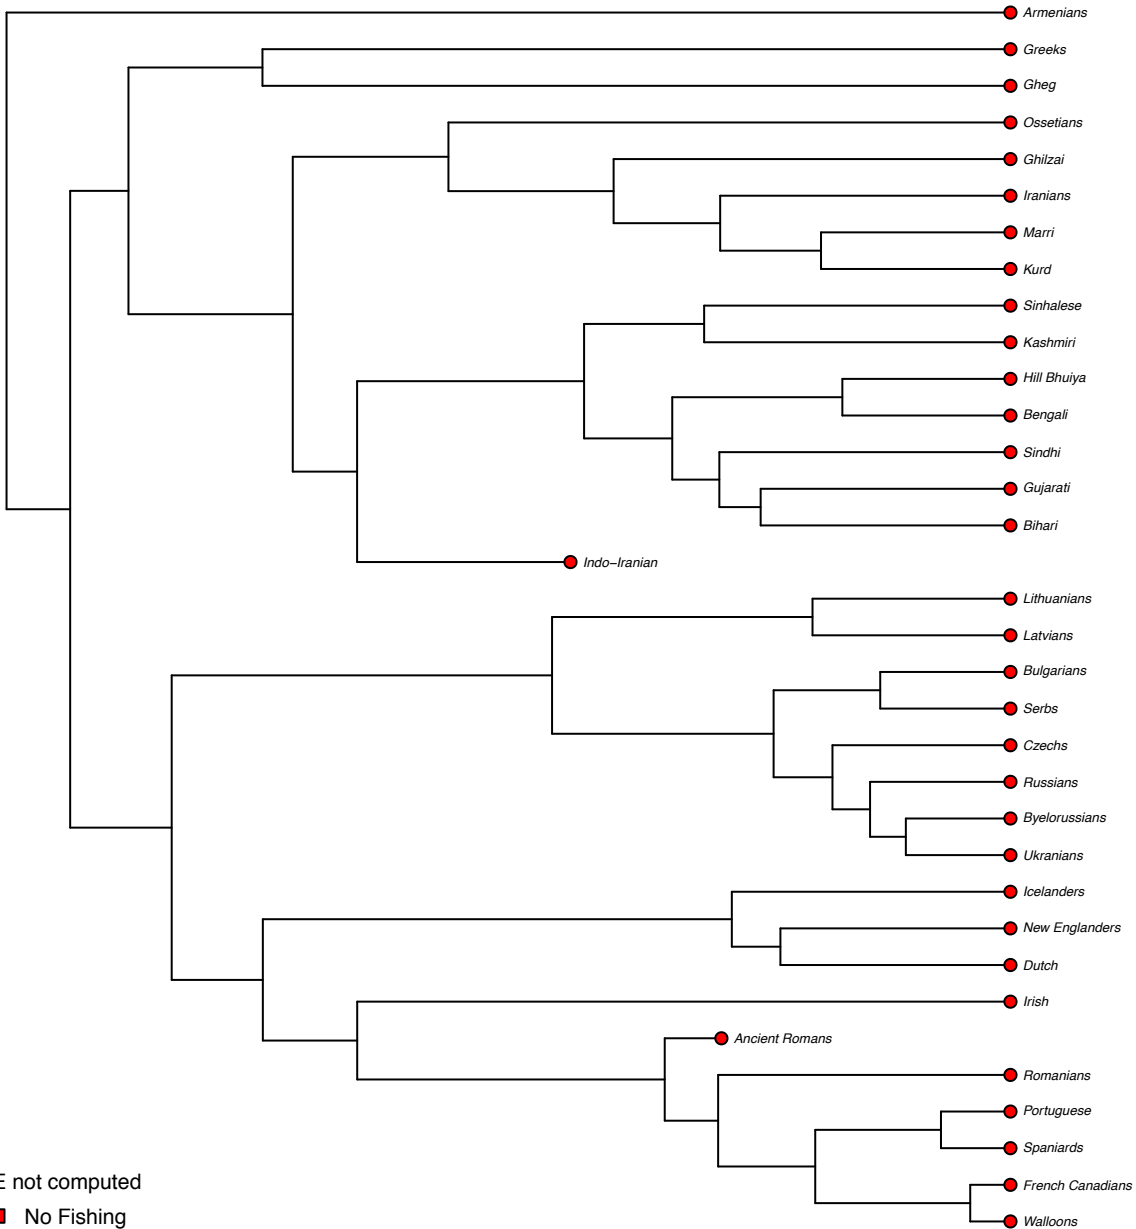

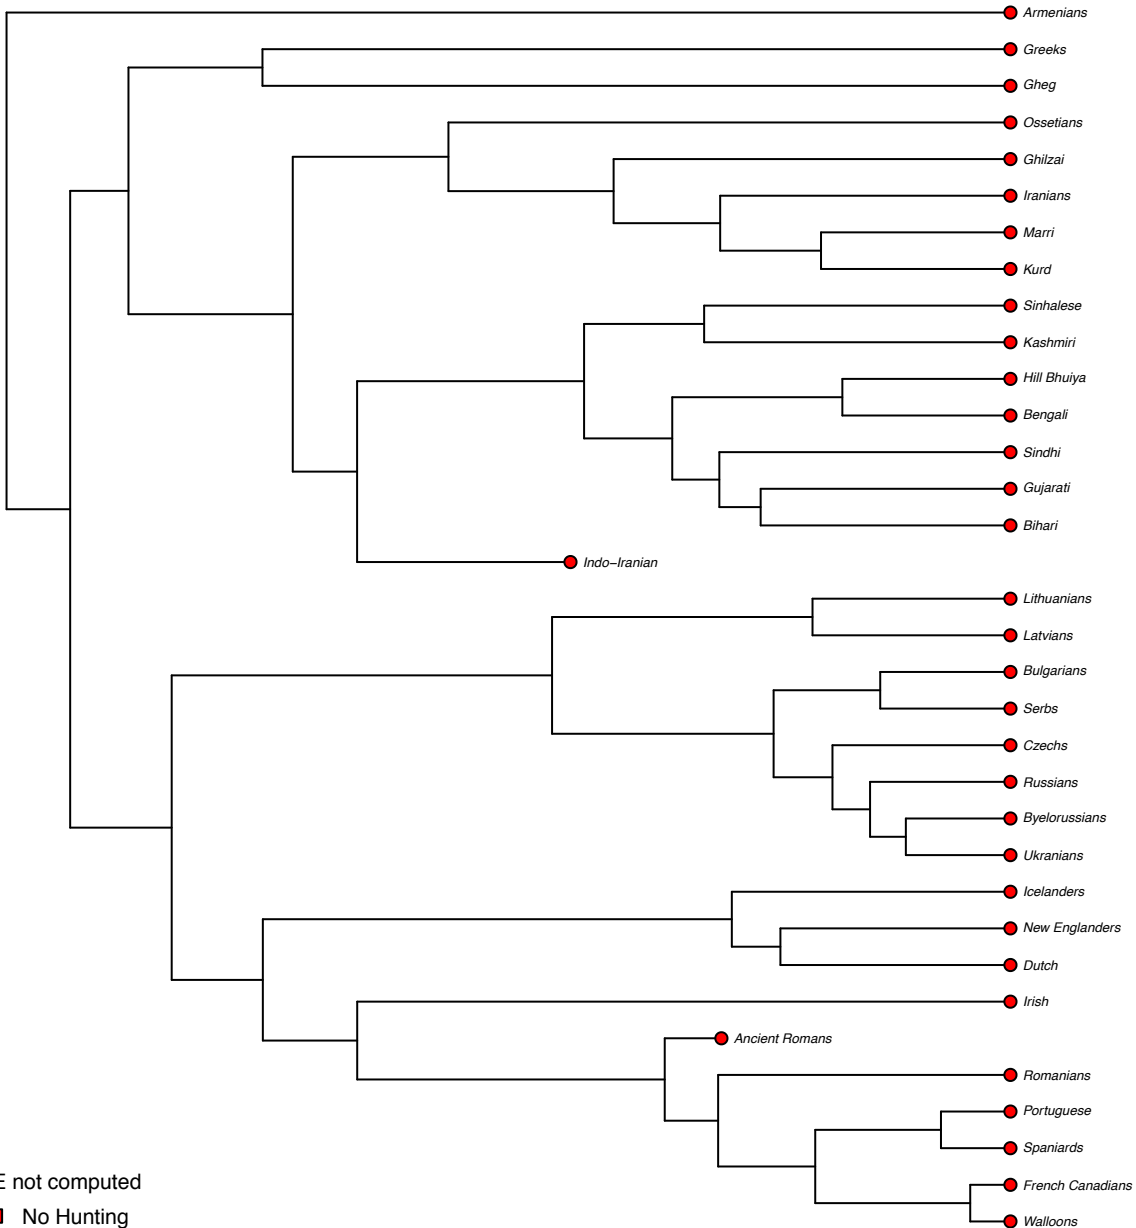

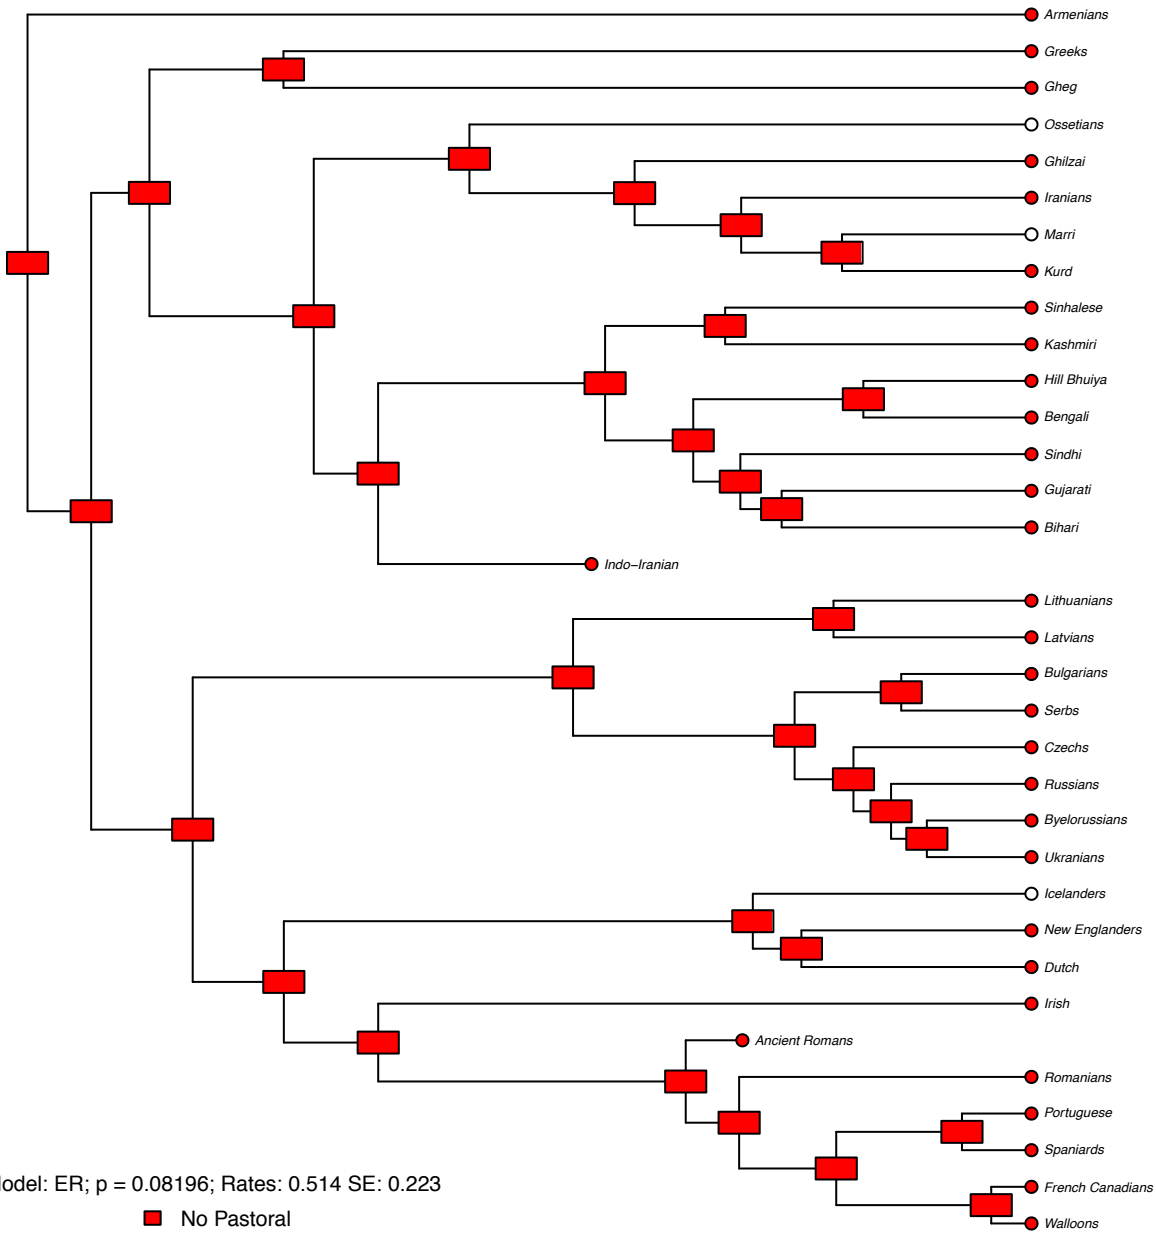

Model: ER;  $p = 0.08196$ ; Rates: 0.514 SE: 0.223

- No Pastoral
- Pastoral



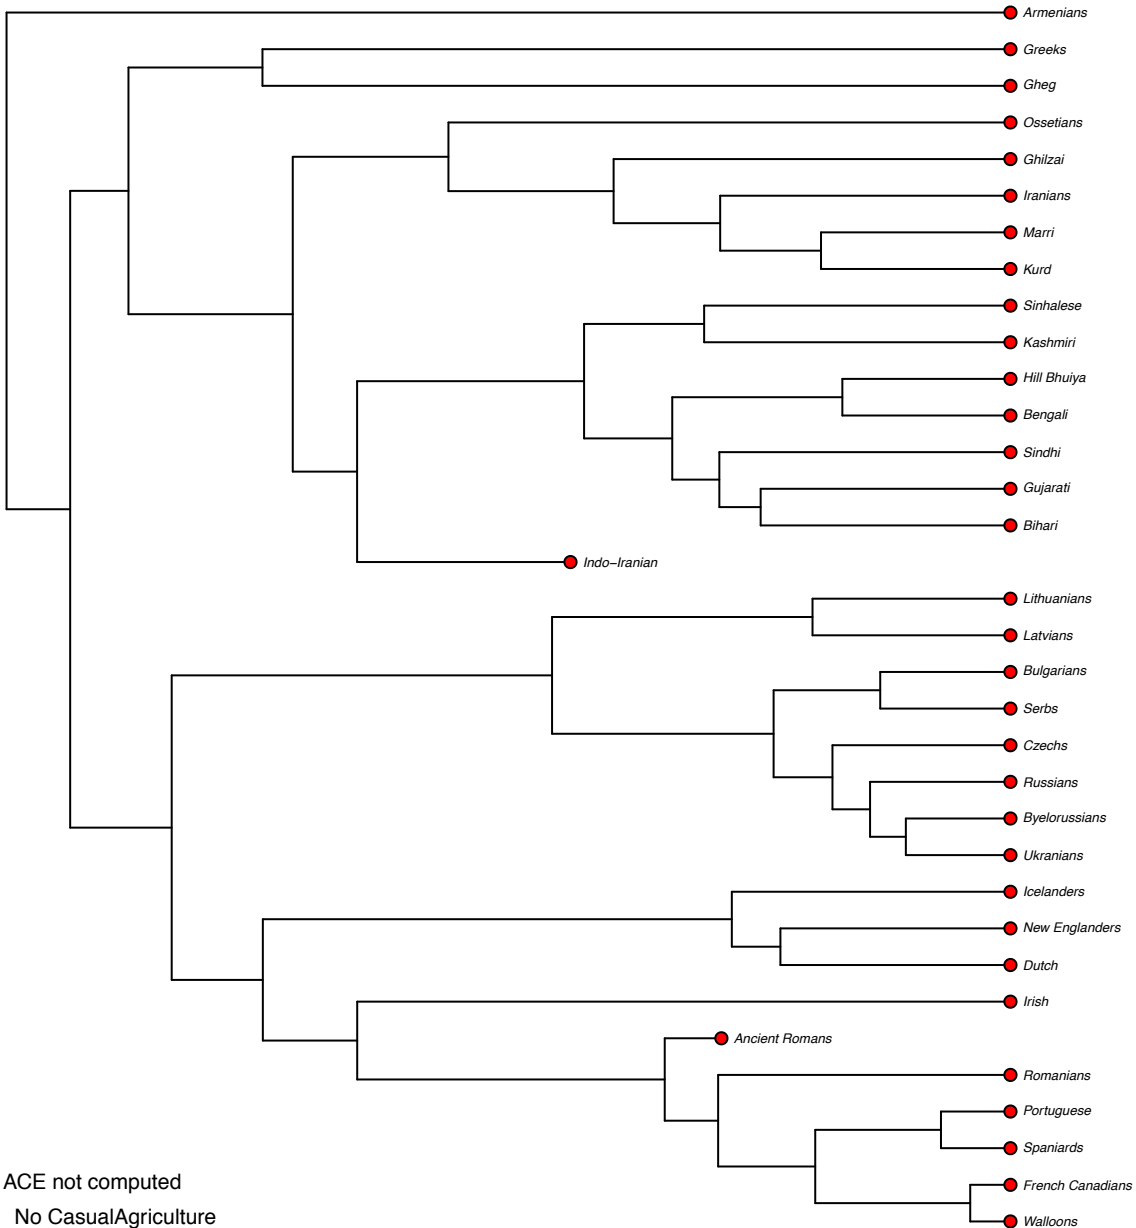

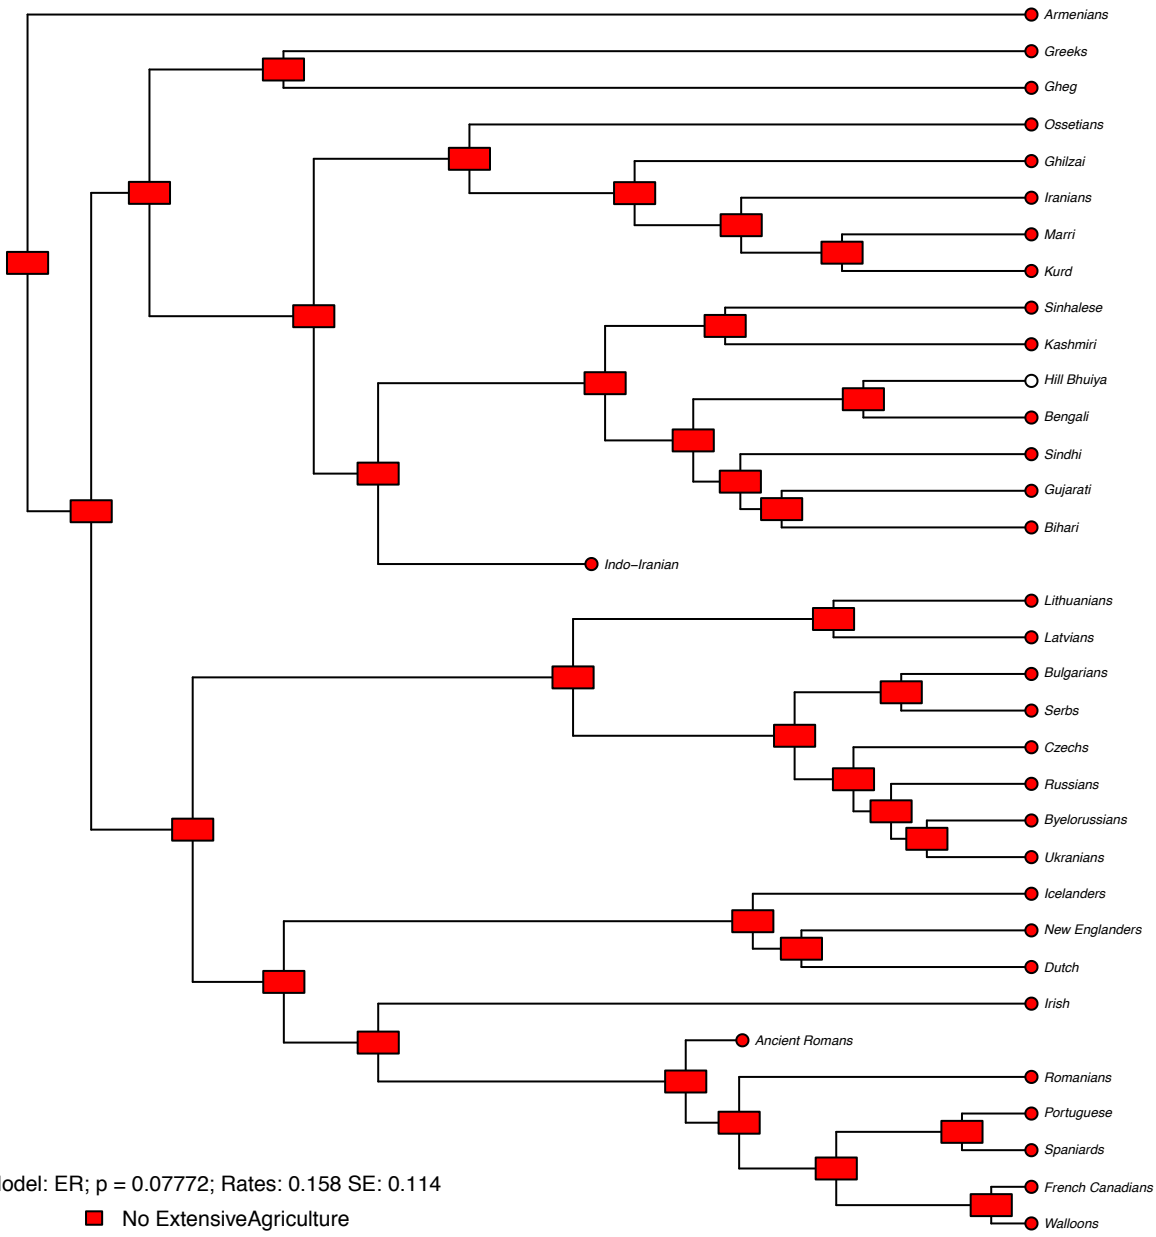

Model: ER;  $p = 0.07772$ ; Rates: 0.158 SE: 0.114

- No ExtensiveAgriculture
- ExtensiveAgriculture

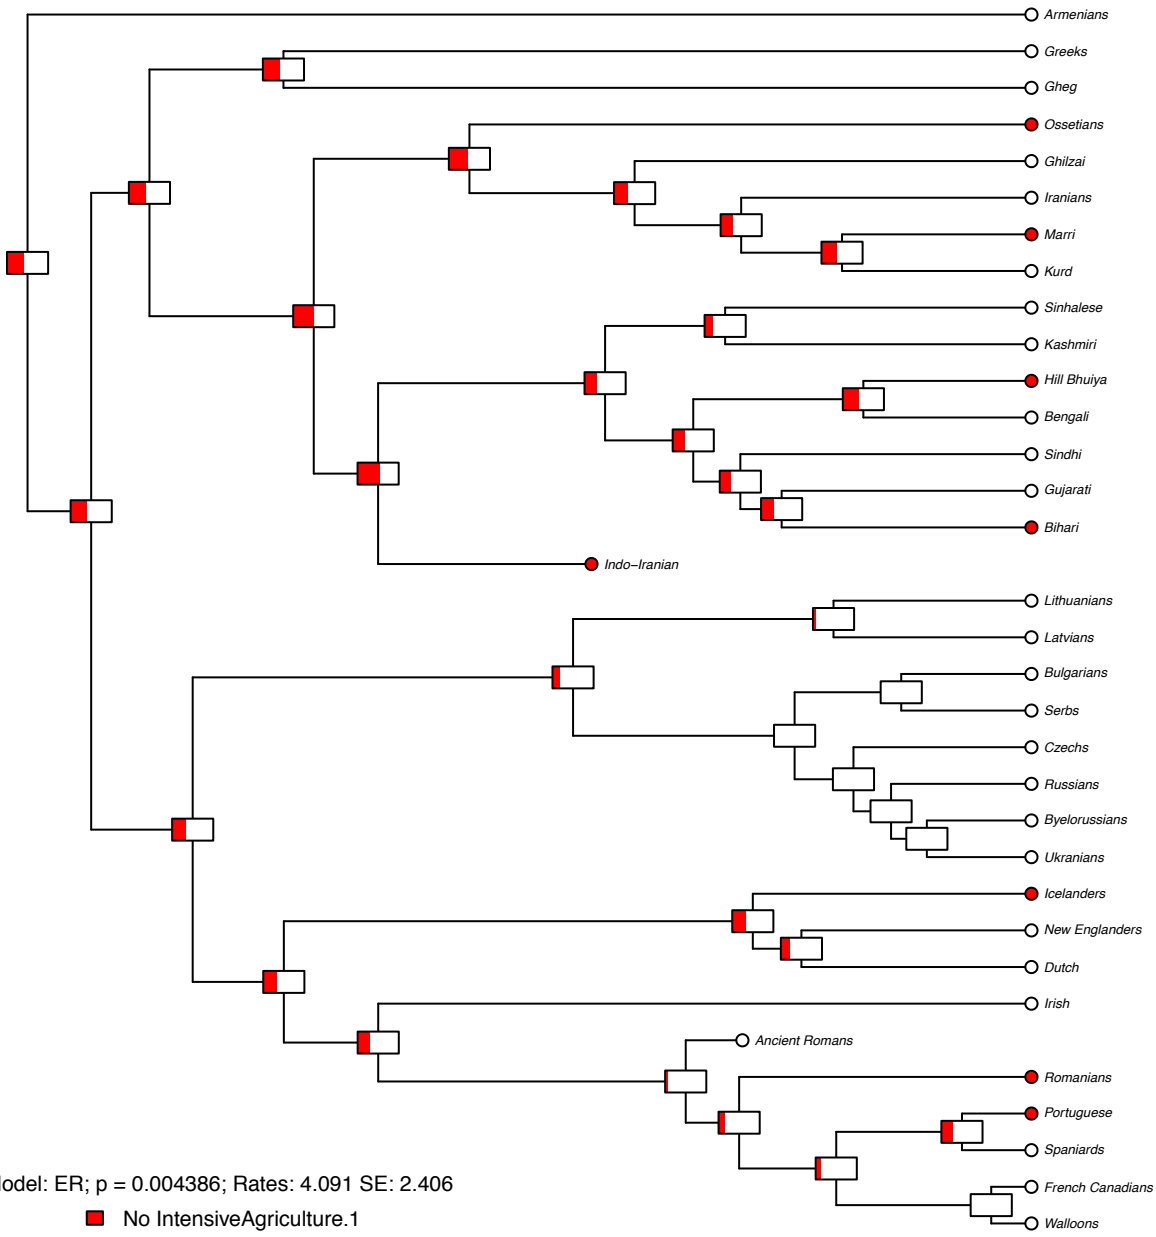

Model: ER;  $p = 0.004386$ ; Rates: 4.091 SE: 2.406

- No IntensiveAgriculture.1
- IntensiveAgriculture.1

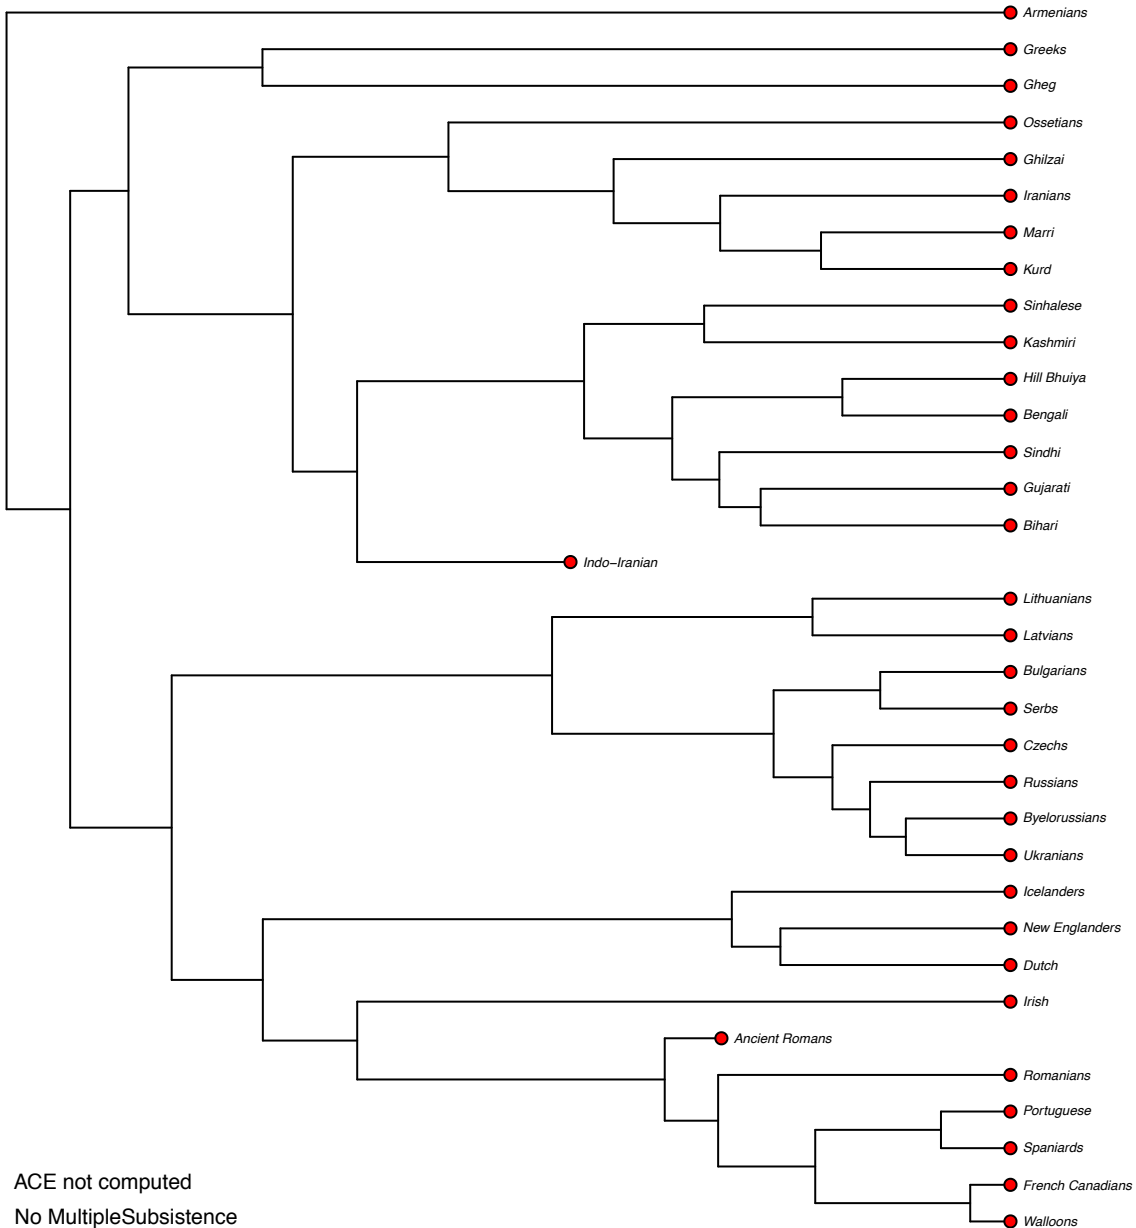

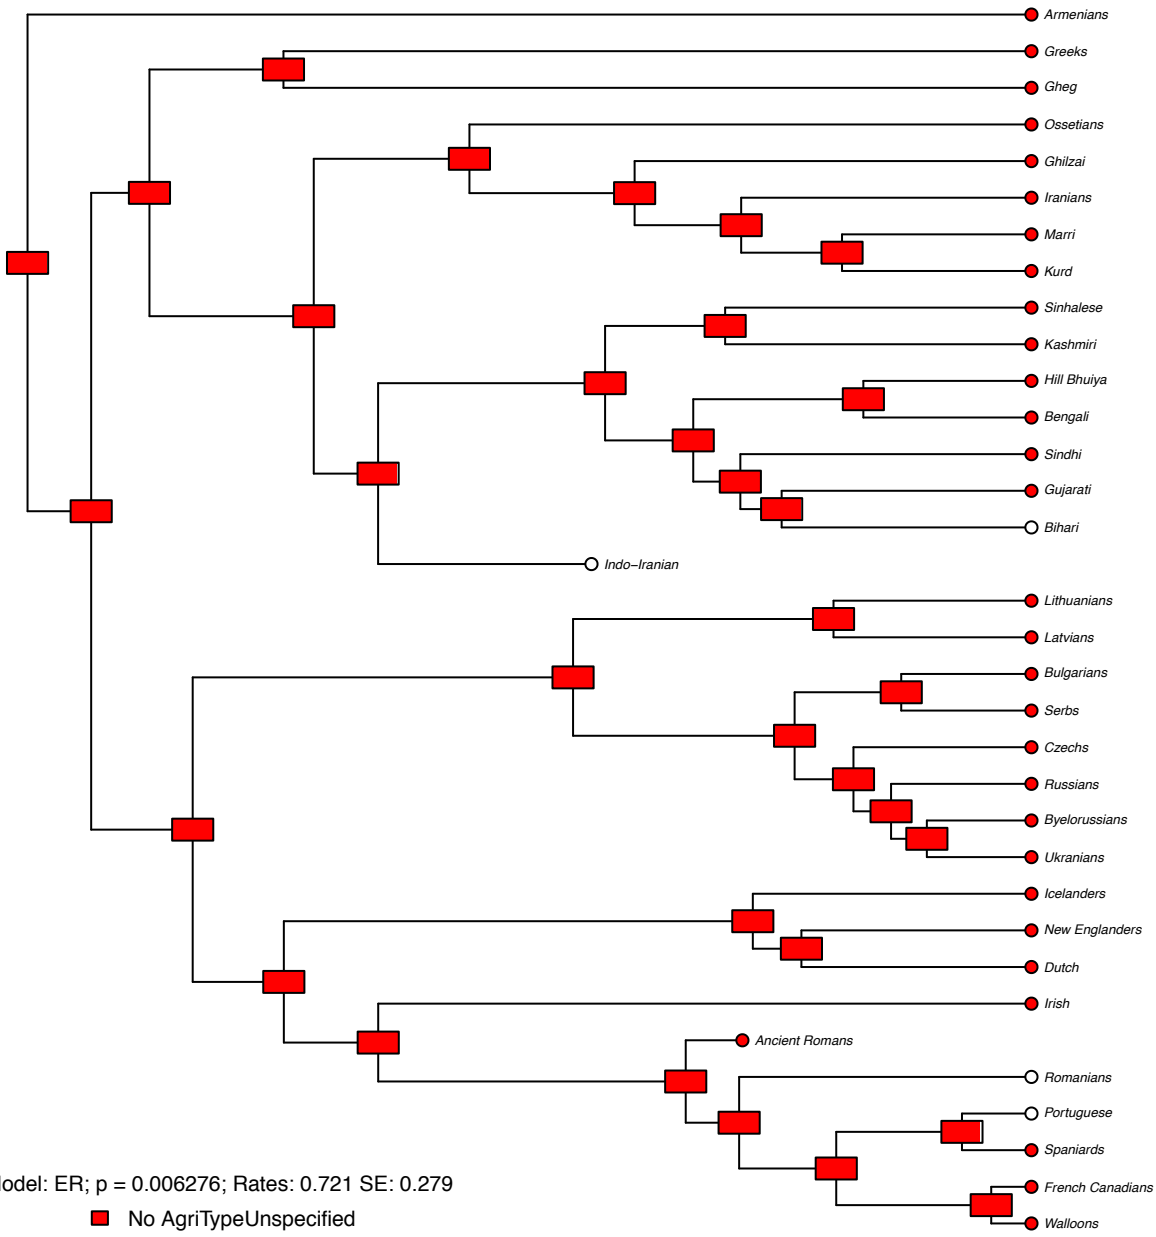

Model: ER;  $p = 0.006276$ ; Rates: 0.721 SE: 0.279

- No AgriTypeUnspecified
- AgriTypeUnspecified

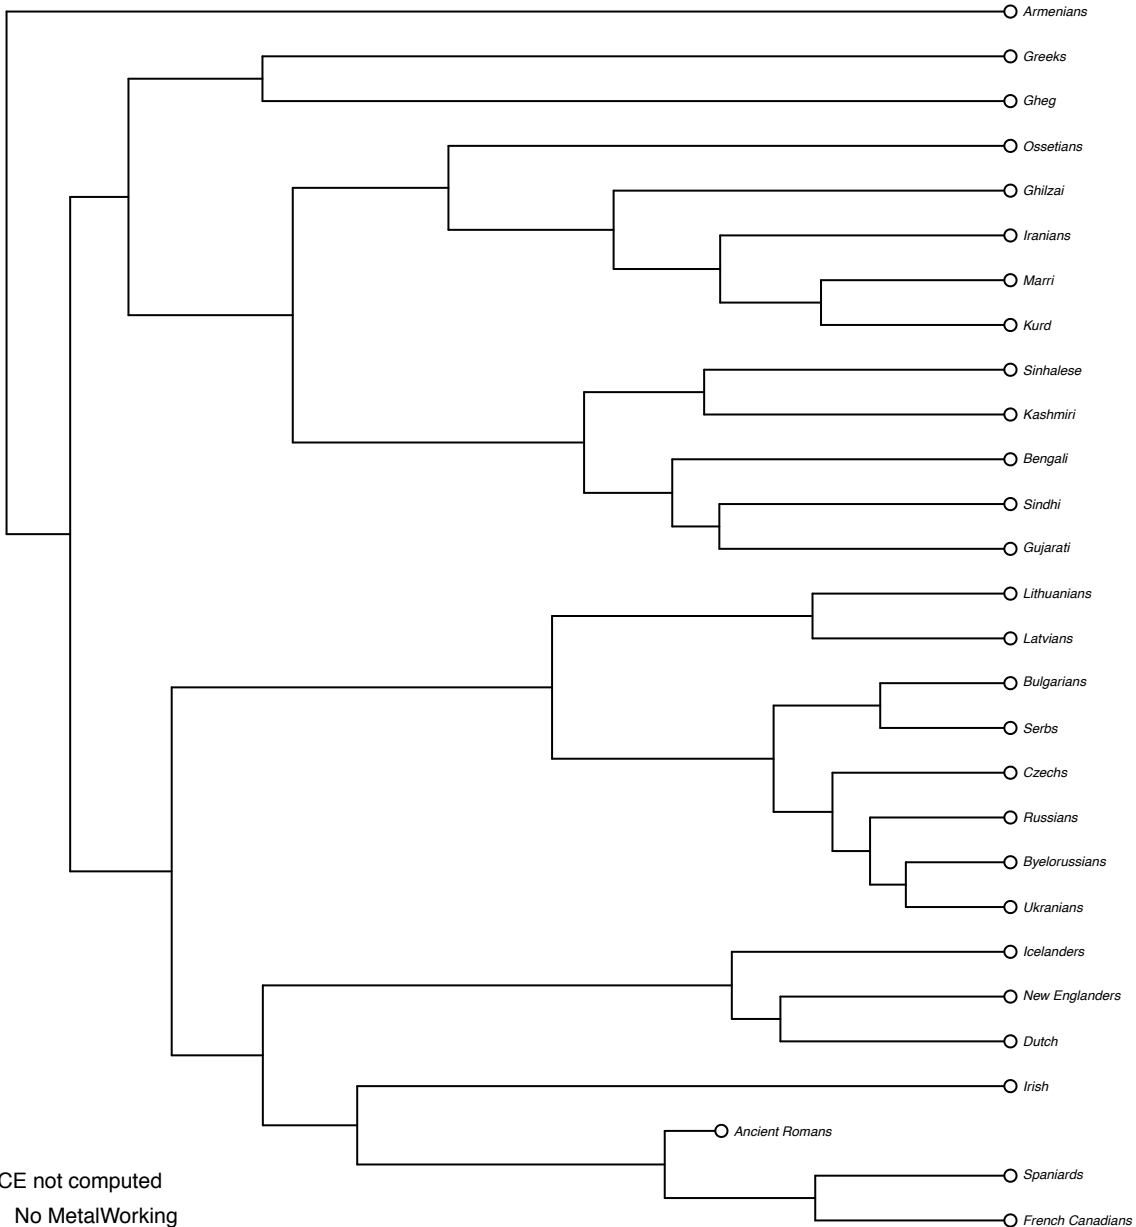

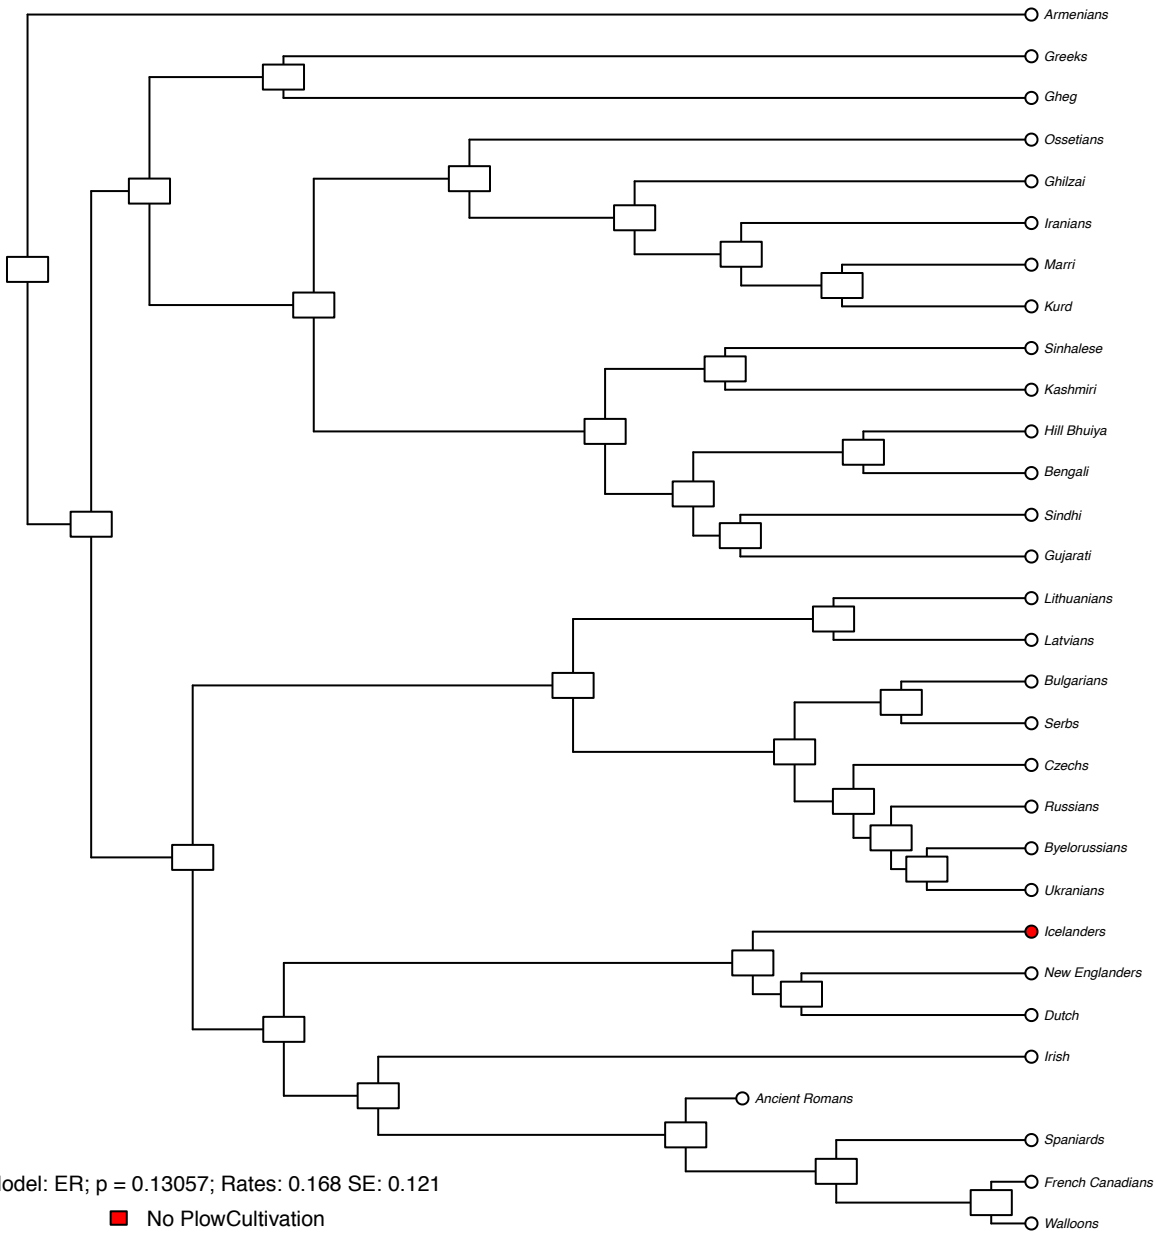

Armenians  
 Greeks  
 Ghag  
 Ossetians  
 Ghilzai  
 Iranians  
 Marri  
 Kurd  
 Sinhalese  
 Kashmiri  
 Hill Bhuiya  
 Bengali  
 Sindhi  
 Gujarati  
 Lithuanians  
 Latvians  
 Bulgarians  
 Serbs  
 Czechs  
 Russians  
 Byelorussians  
 Ukrainians  
 Icelanders  
 New Englanders  
 Dutch  
 Irish  
 Ancient Romans  
 Spaniards  
 French Canadians  
 Wallons

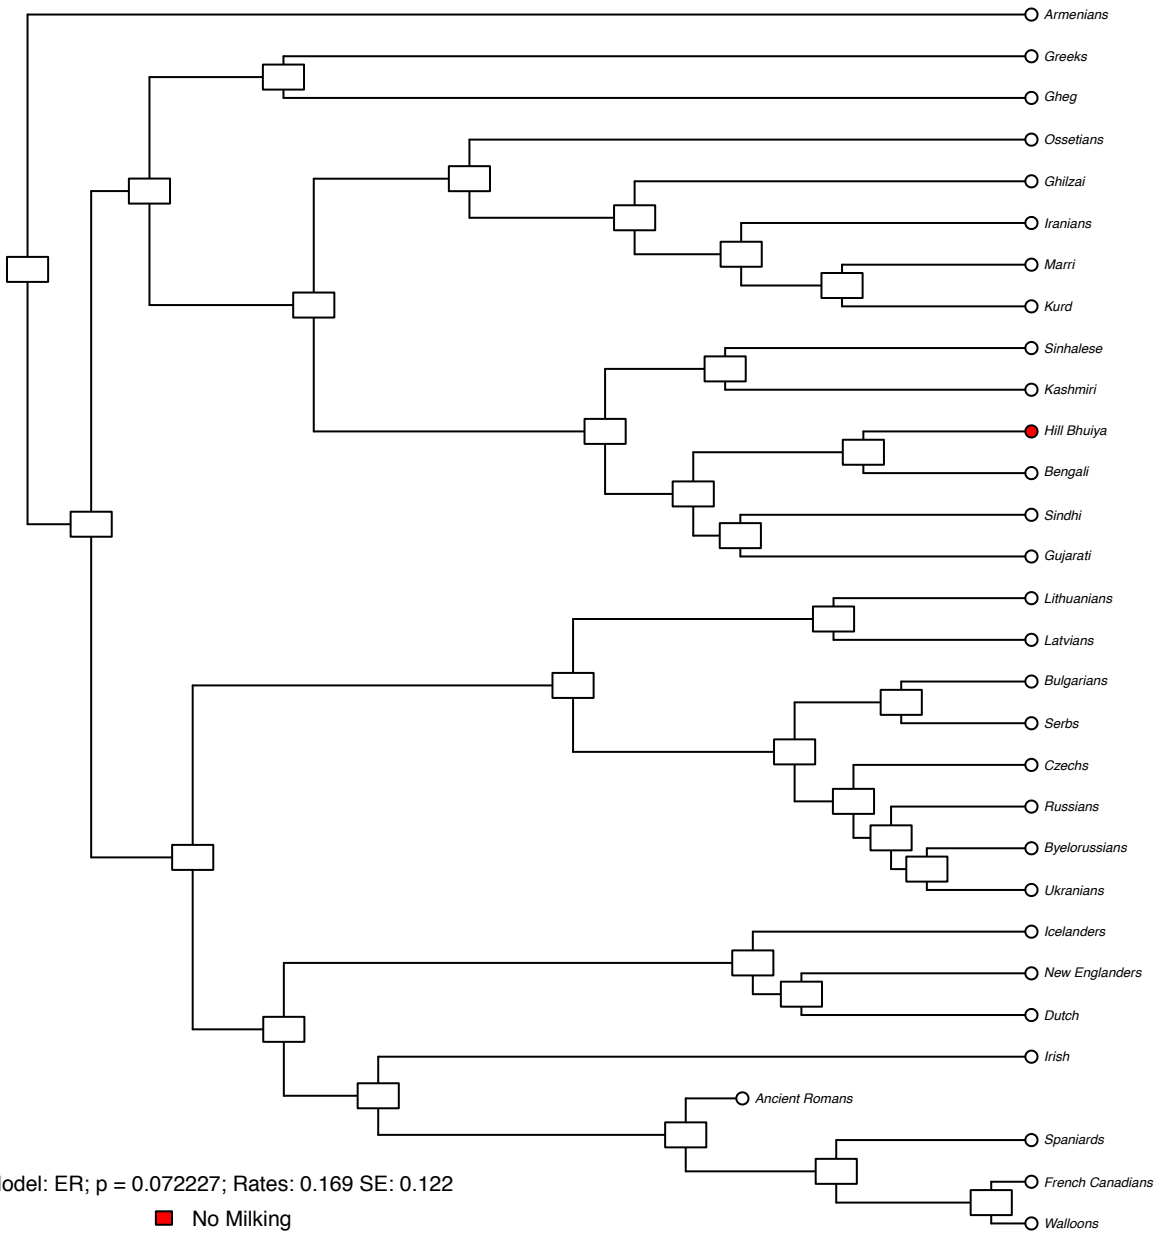

Model: ER;  $p = 0.072227$ ; Rates: 0.169 SE: 0.122

■ No Milking  
 Milking



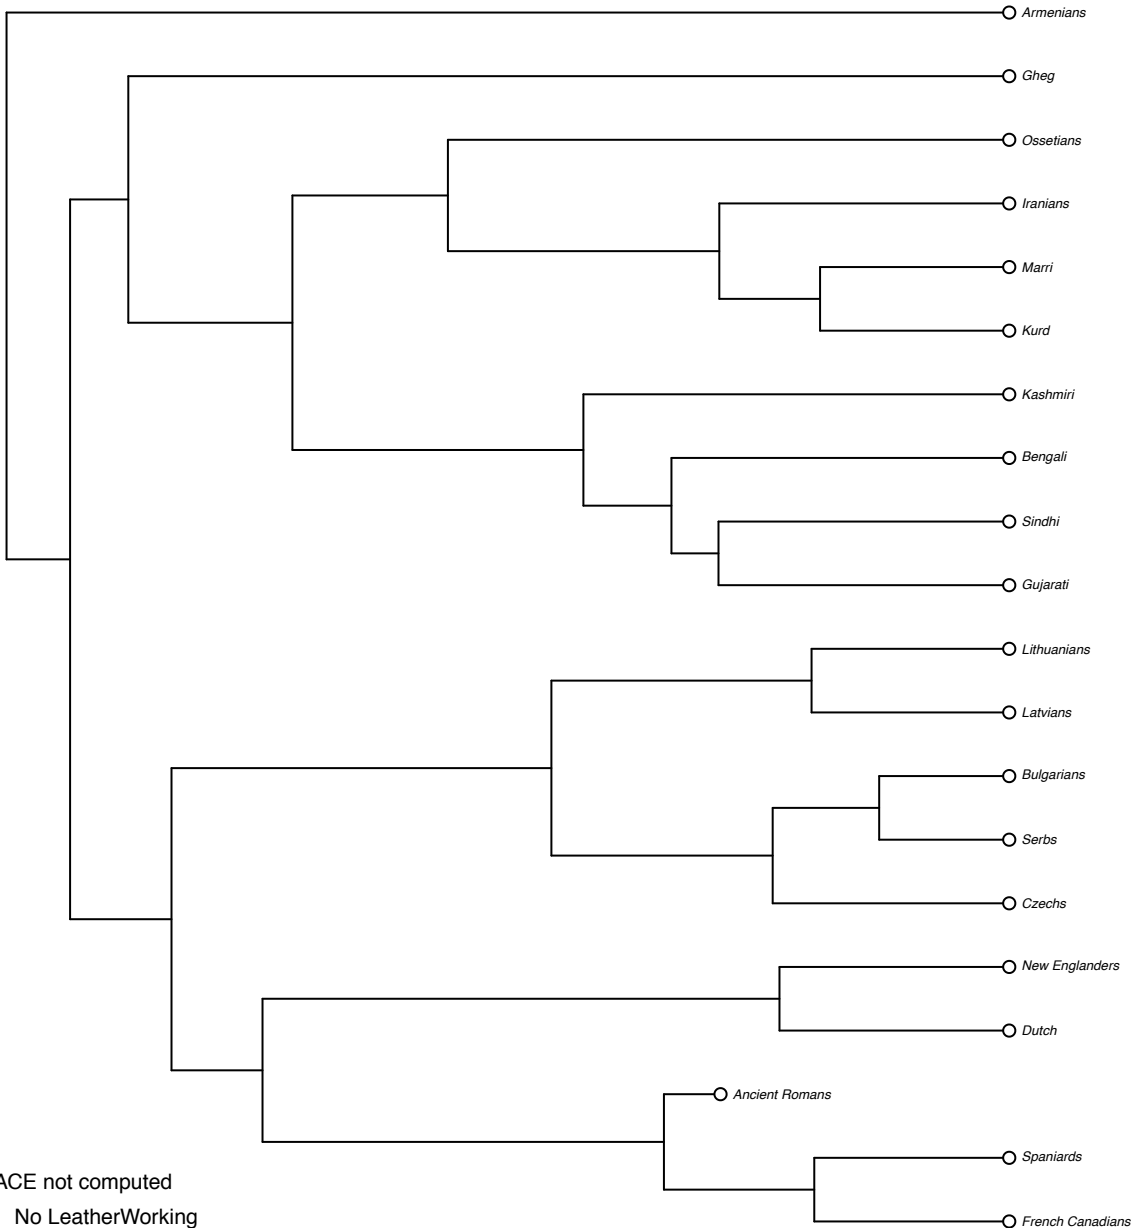

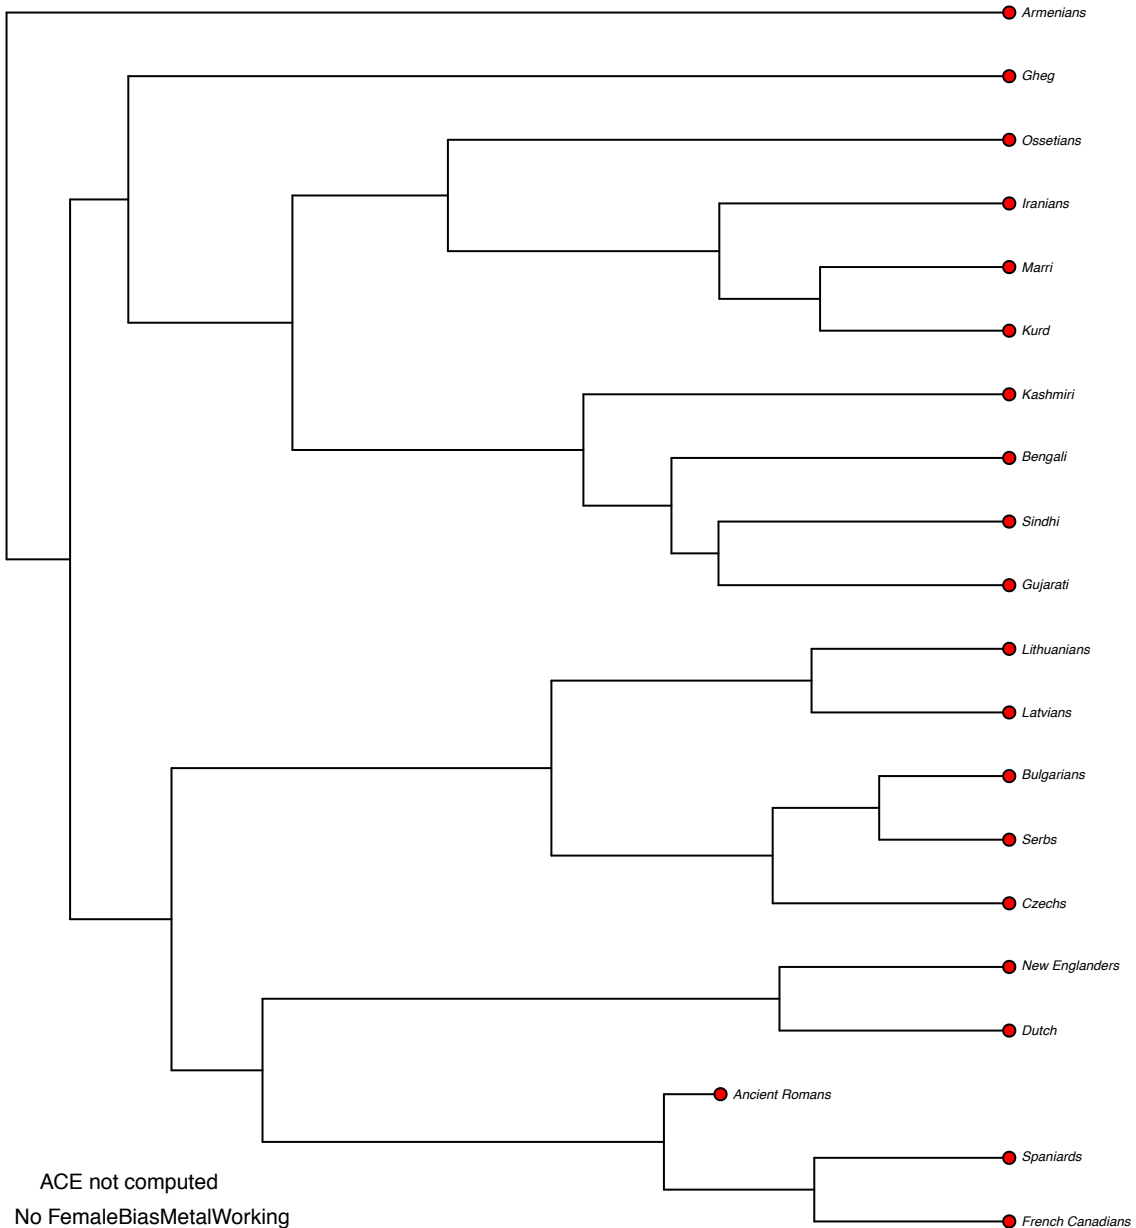

● Armenians

● Gheg

● Ossetians

● Iranians

● Marri

● Kurd

● Kashmiri

● Bengali

● Sindhi

● Gujarati

● Lithuanians

● Latvians

● Bulgarians

● Serbs

● Czechs

● New Englanders

● Dutch

● Ancient Romans

● Spaniards

● French Canadians

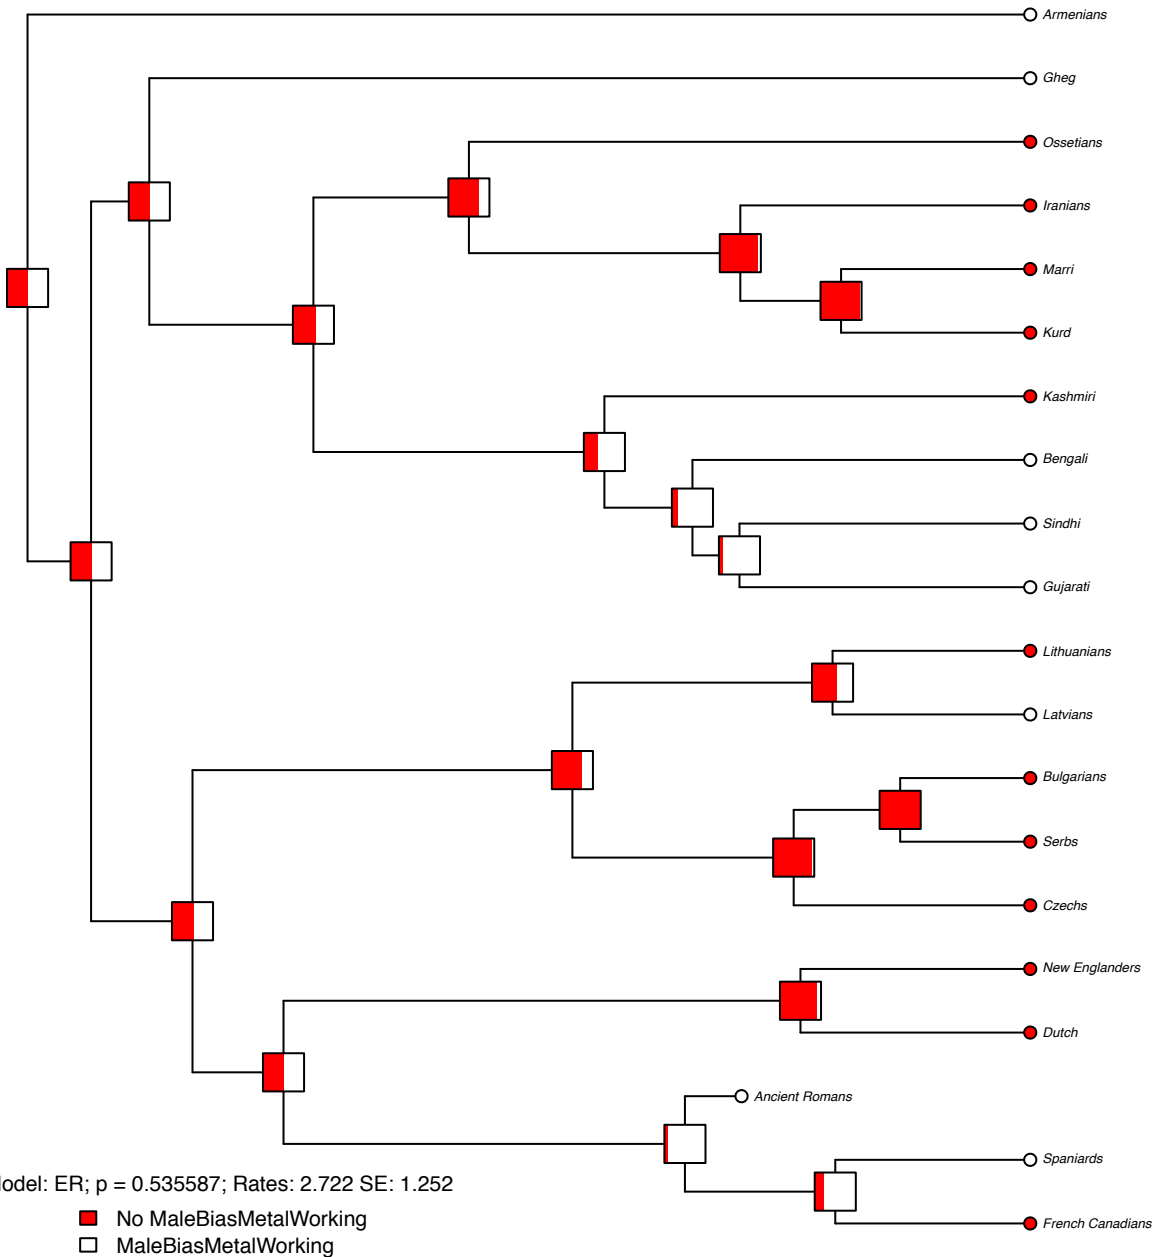

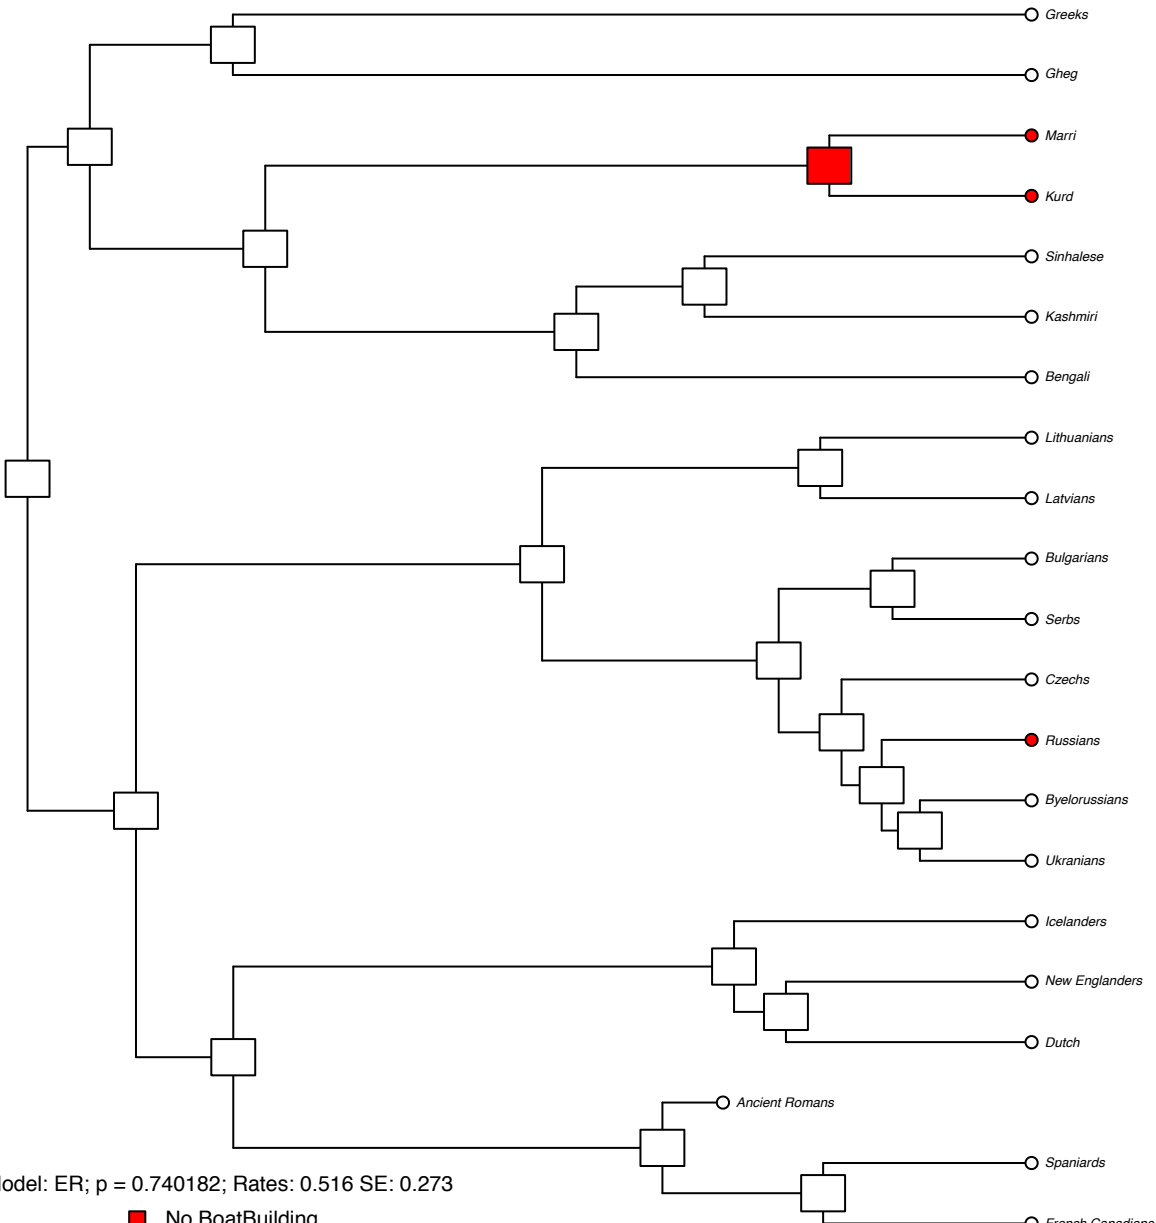

Greeks  
 Gheg  
 Marri  
 Kurd  
 Sinhalese  
 Kashmiri  
 Bengali  
 Lithuanians  
 Latvians  
 Bulgarians  
 Serbs  
 Czechs  
 Russians  
 Byelorussians  
 Ukrainians  
 Icelanders  
 New Englanders  
 Dutch  
 Ancient Romans  
 Spaniards  
 French Canadians

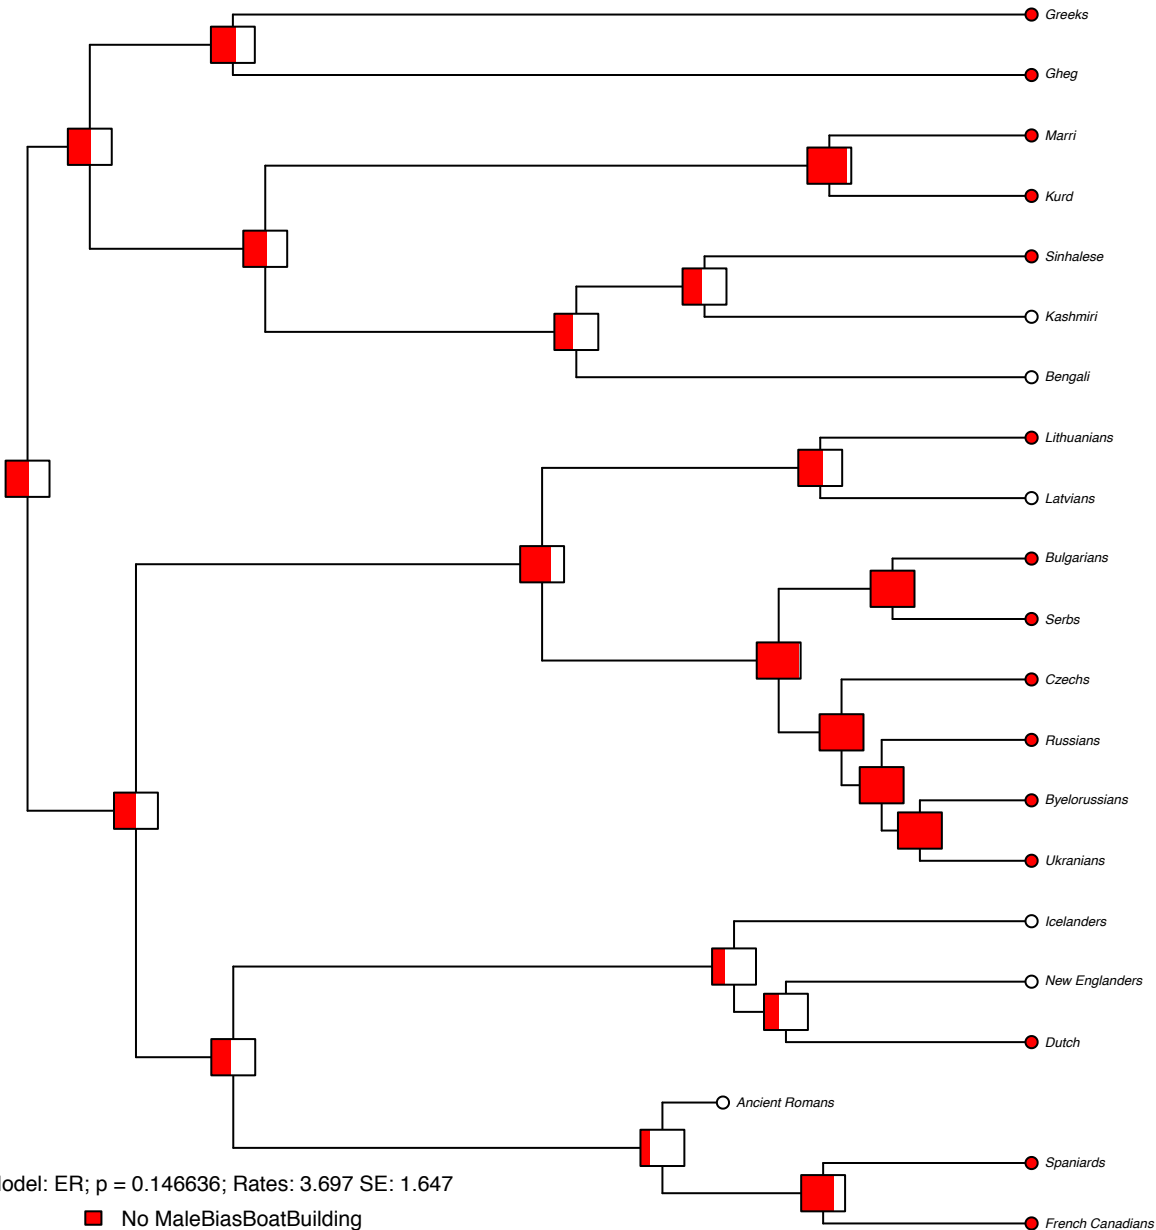

- *Greeks*
- *Gheg*
- *Marri*
- *Kurd*
- *Sinhalese*
- Kashmiri*
- Bengali*
- *Lithuanians*
- Latvians*
- *Bulgarians*
- *Serbs*
- *Czechs*
- *Russians*
- *Byelorussians*
- *Ukrainians*
- Icelanders*
- New Englanders*
- *Dutch*
- Ancient Romans*
- *Spaniards*
- *French Canadians*

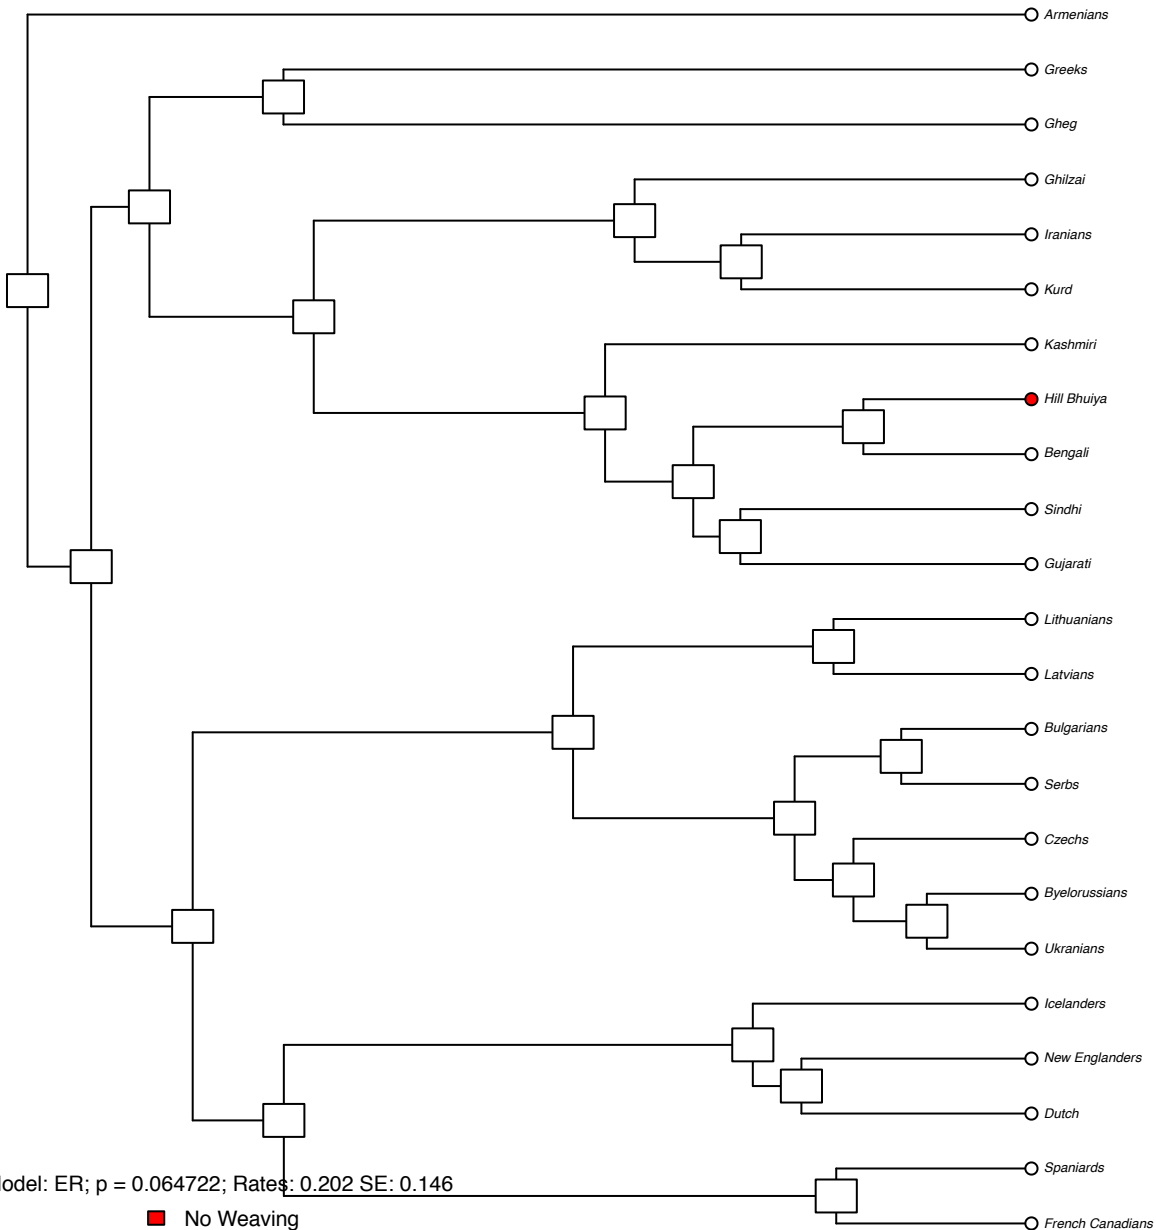

- Armenians
- Greeks
- Ghag
- Ghizai
- Iranians
- Kurd
- Kashmiri
- Hill Bhuiya
- Bengali
- Sindhi
- Gujarati
- Lithuanians
- Latvians
- Bulgarians
- Serbs
- Czechs
- Byelorussians
- Ukrainians
- Icelanders
- New Englanders
- Dutch
- Spaniards
- French Canadians

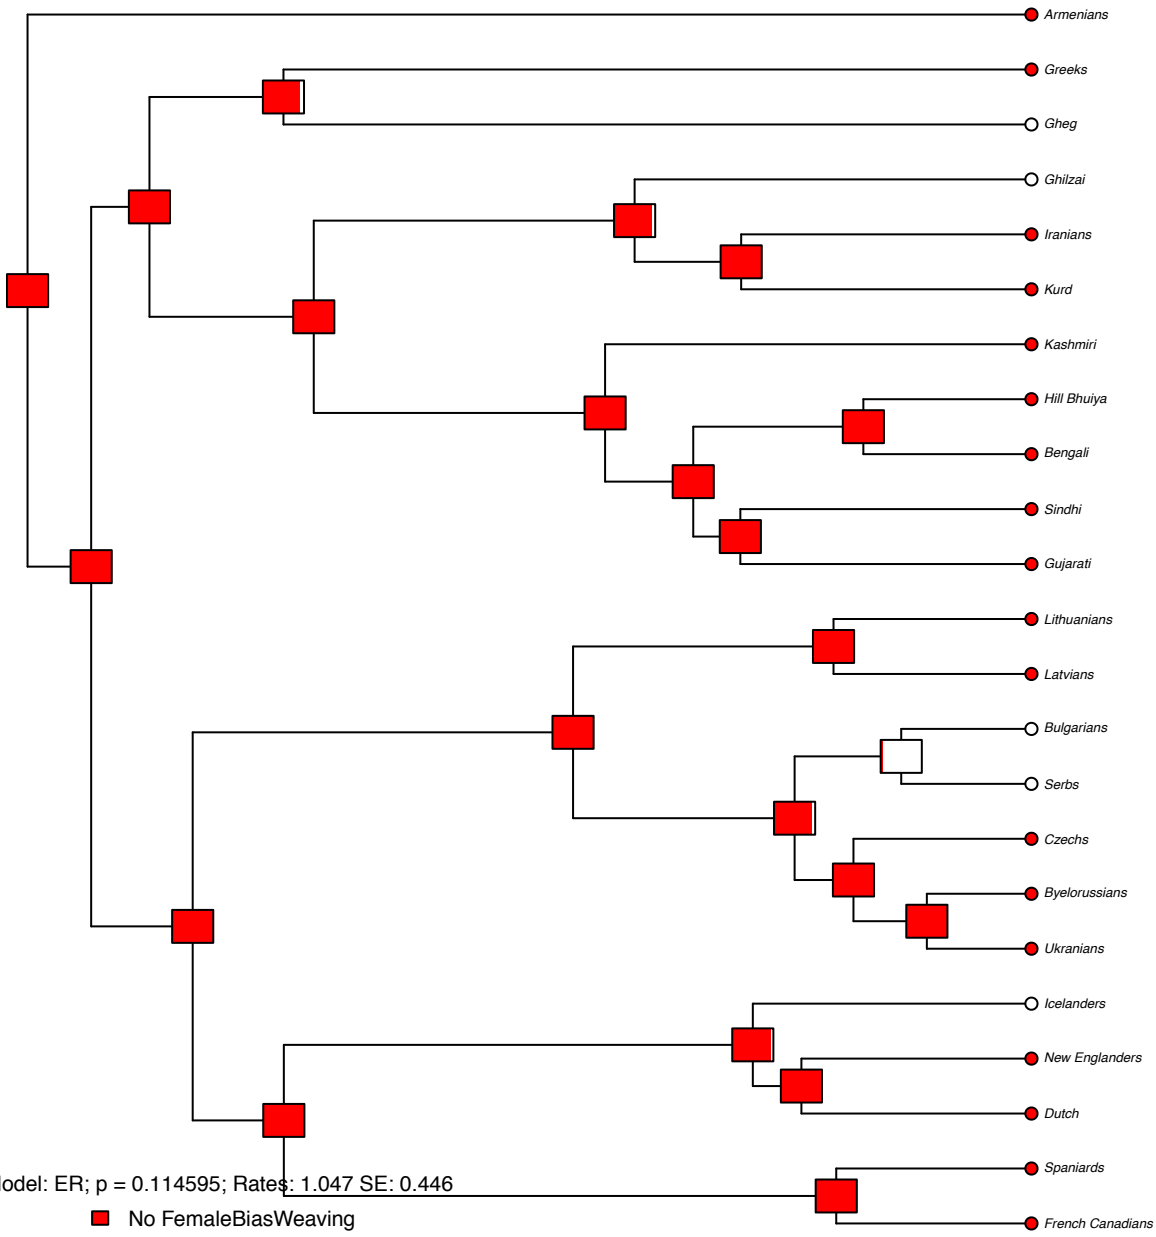

- Armenians
- Greeks
- Ghag
- Ghizai
- Iranians
- Kurd
- Kashmiri
- Hill Bhuiya
- Bengali
- Sindhi
- Gujarati
- Lithuanians
- Latvians
- Bulgarians
- Serbs
- Czechs
- Byelorussians
- Ukrainians
- Icelanders
- New Englanders
- Dutch
- Spaniards
- French Canadians

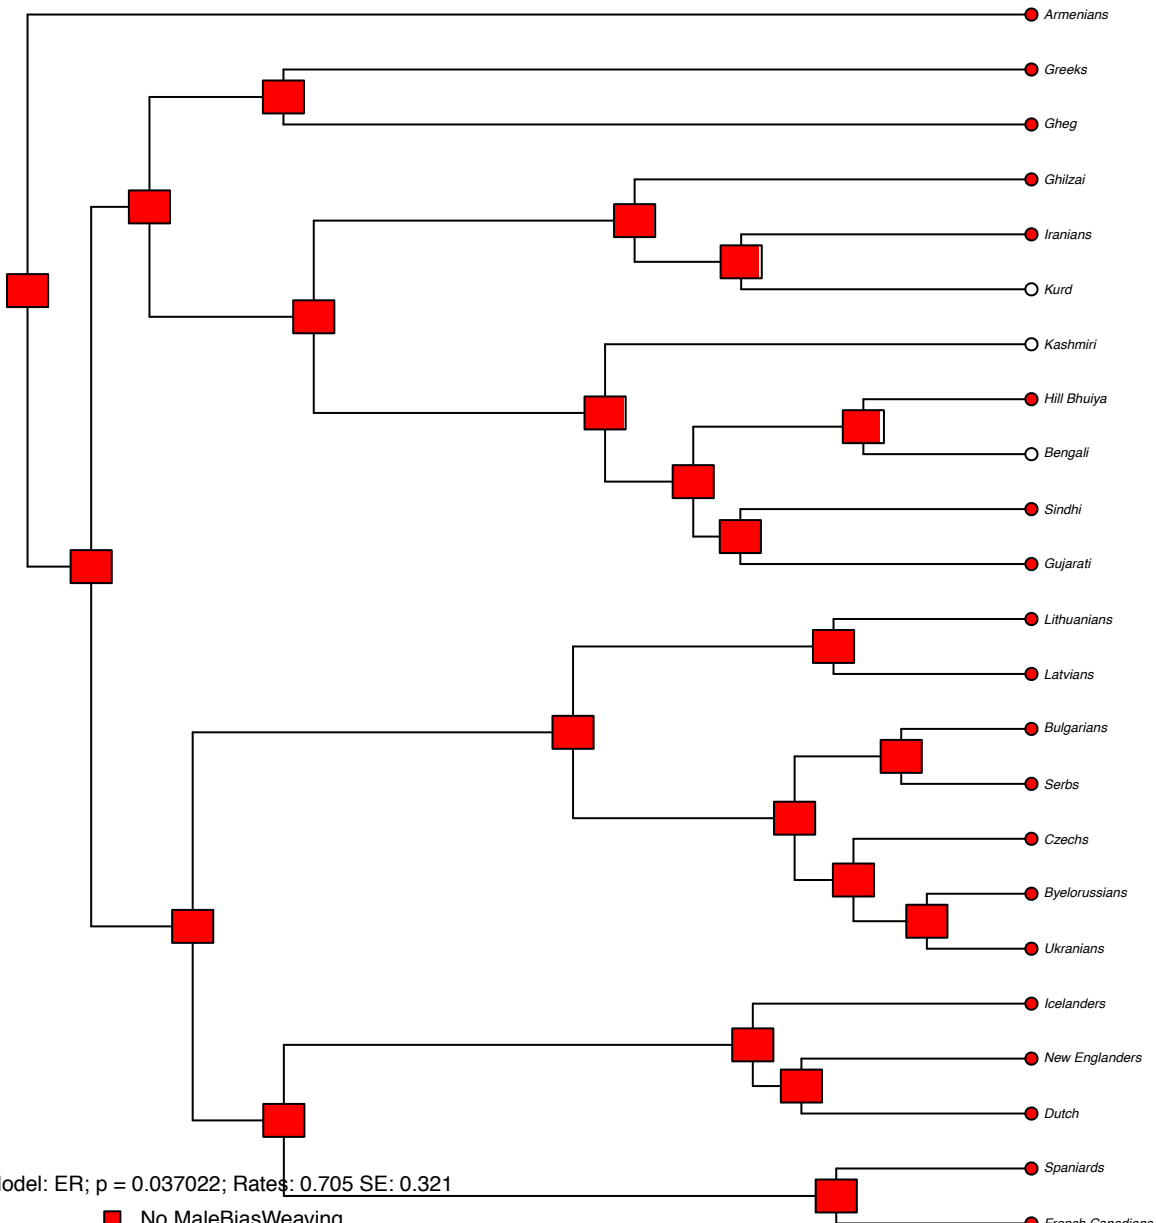

- Armenians
- Greeks
- Ghag
- Ghizai
- Iranians
- Kurd
- Kashmiri
- Hill Bhuiya
- Bengali
- Sindhi
- Gujarati
- Lithuanians
- Latvians
- Bulgarians
- Serbs
- Czechs
- Byelorussians
- Ukrainians
- Icelanders
- New Englanders
- Dutch
- Spaniards
- French Canadians



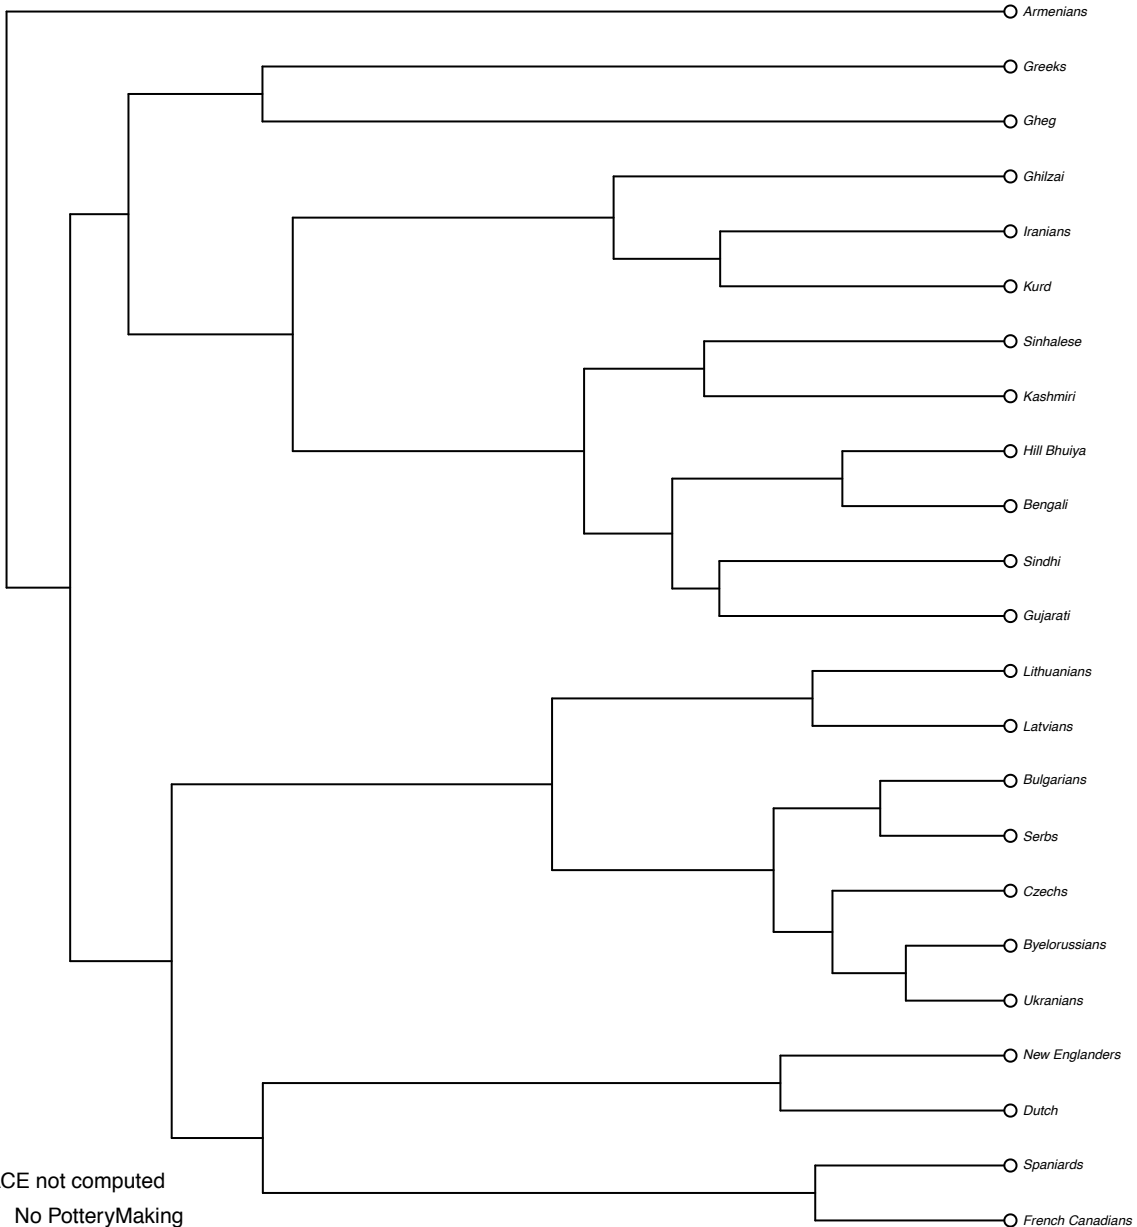

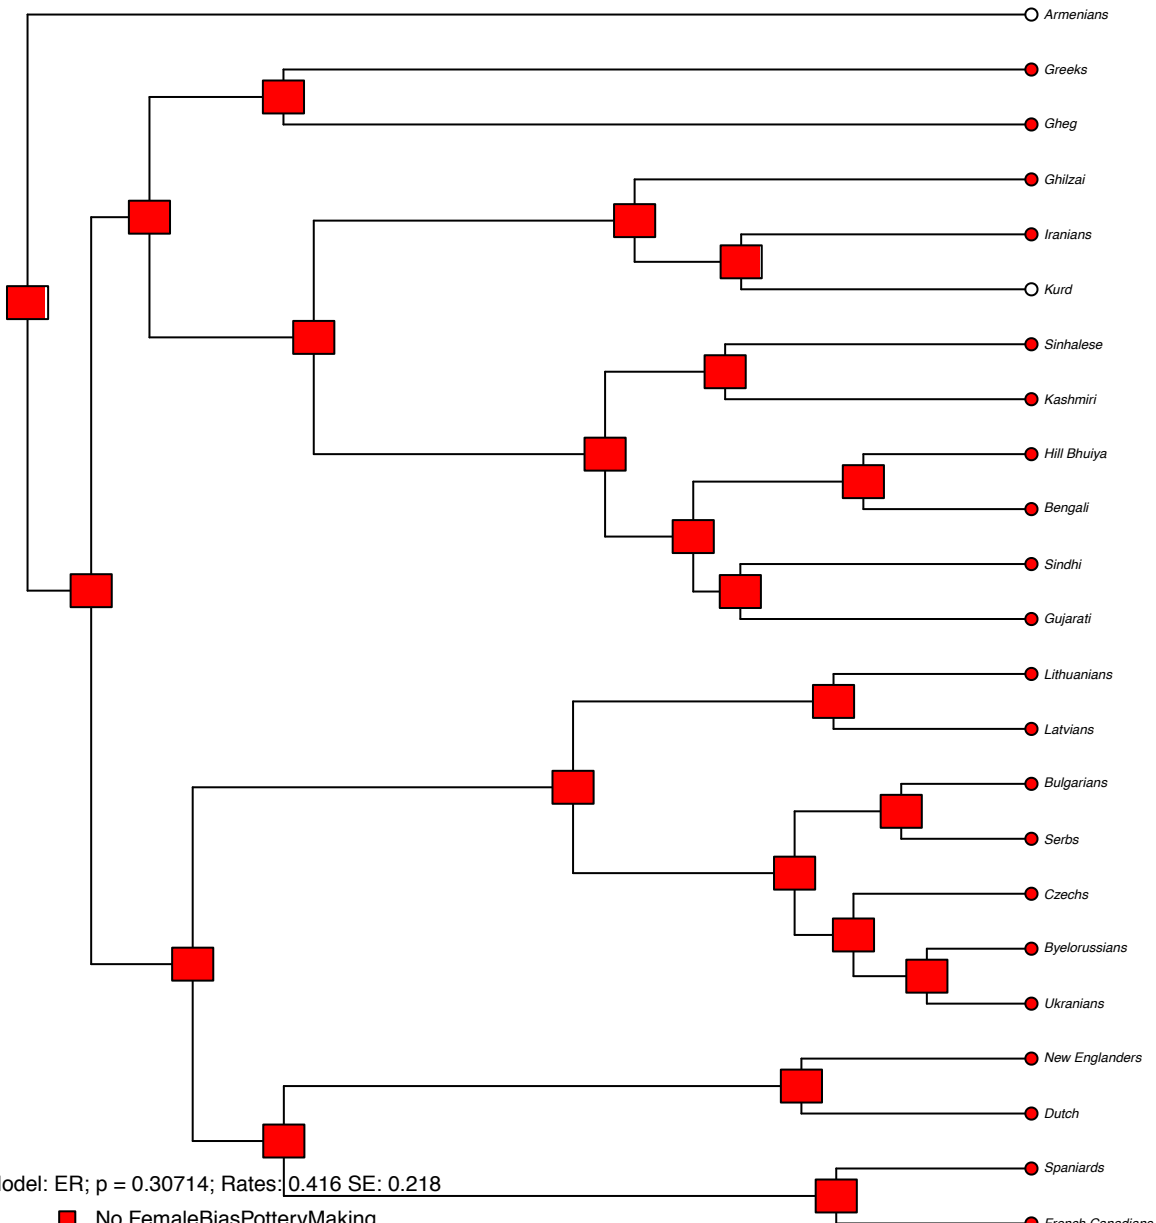

Model: ER;  $p = 0.30714$ ; Rates: 0.416 SE: 0.218

- No FemaleBiasPotteryMaking
- FemaleBiasPotteryMaking

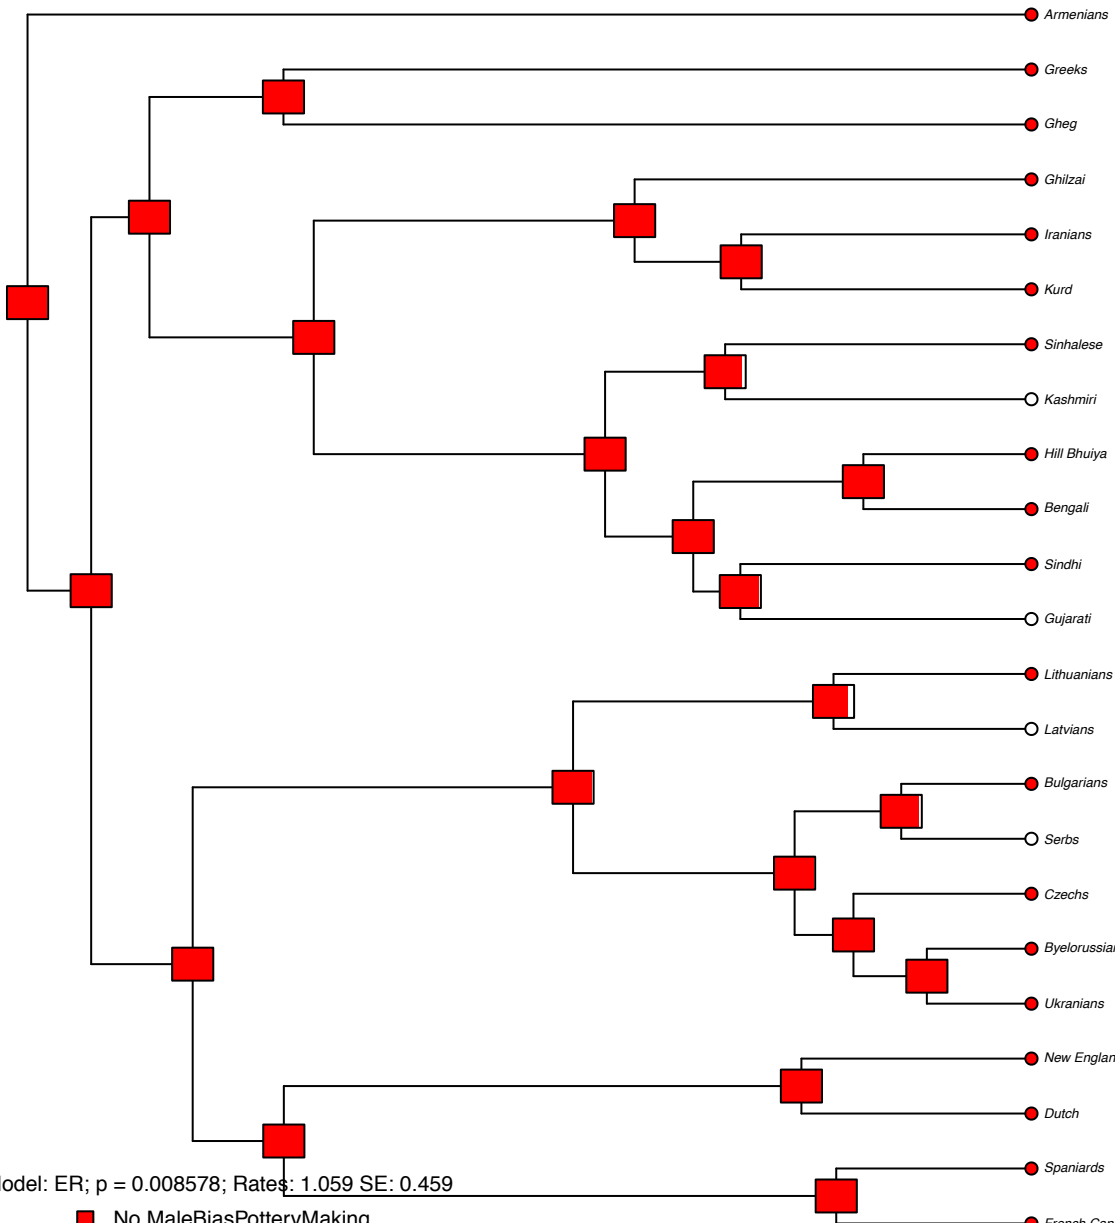

No MaleBiasPotteryMaking  
 MaleBiasPotteryMaking

- Armenians
- Greeks
- Ghag
- Ghilzai
- Iranians
- Kurd
- Sinhalese
- Kashmiri
- Hill Bhuiya
- Bengali
- Sindhi
- Gujarati
- Lithuanians
- Latvians
- Bulgarians
- Serbs
- Czechs
- Byelorussians
- Ukrainians
- New Englanders
- Dutch
- Spaniards
- French Canadians

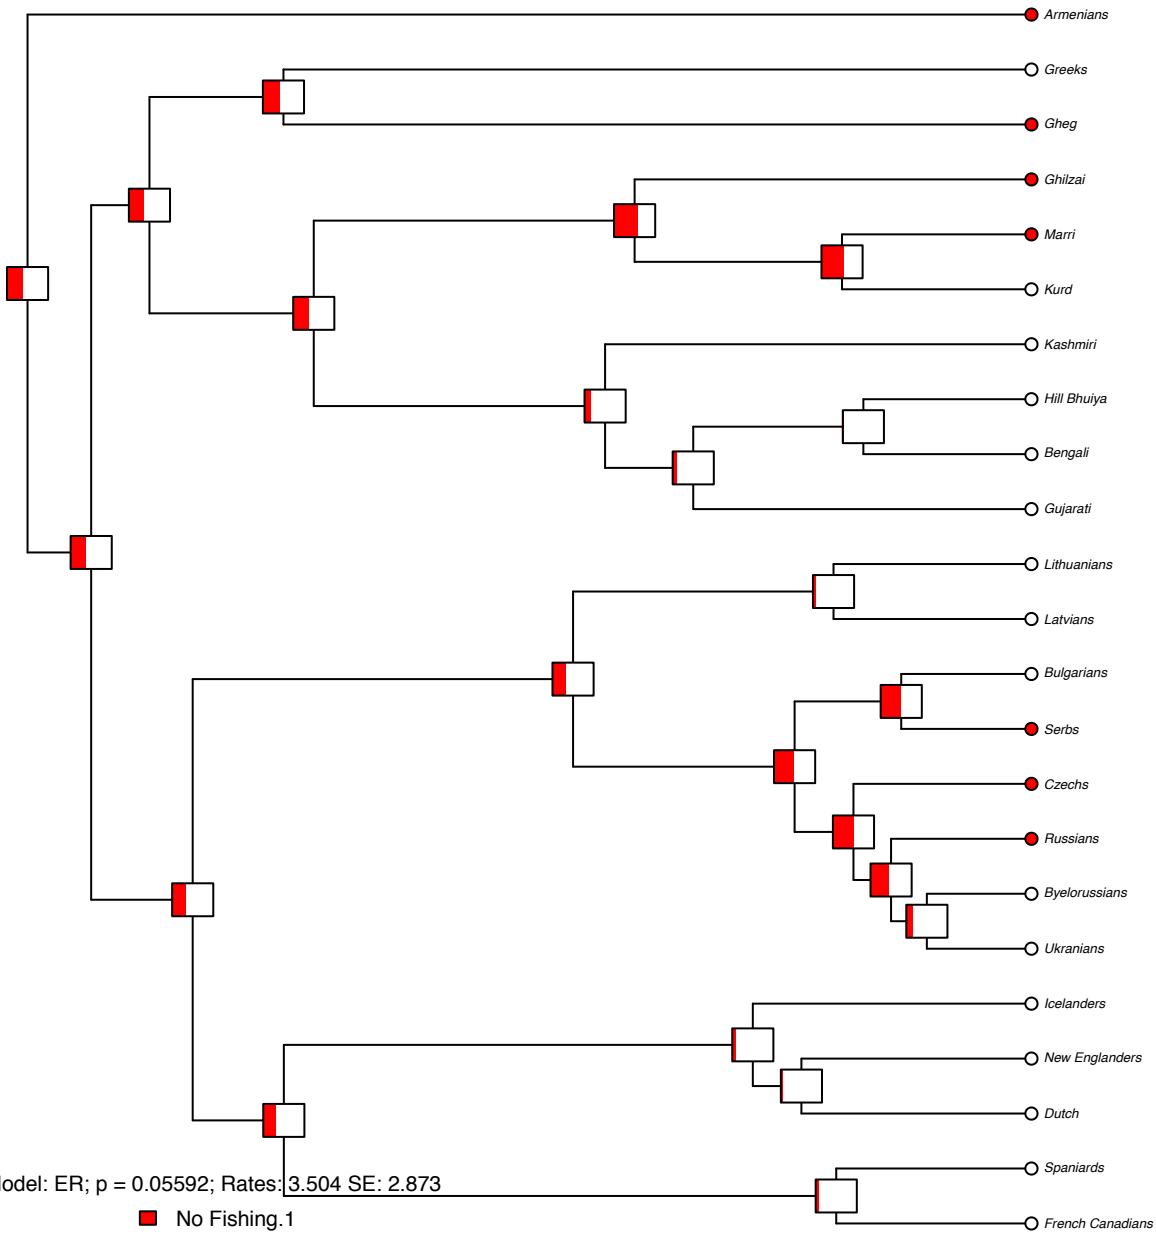

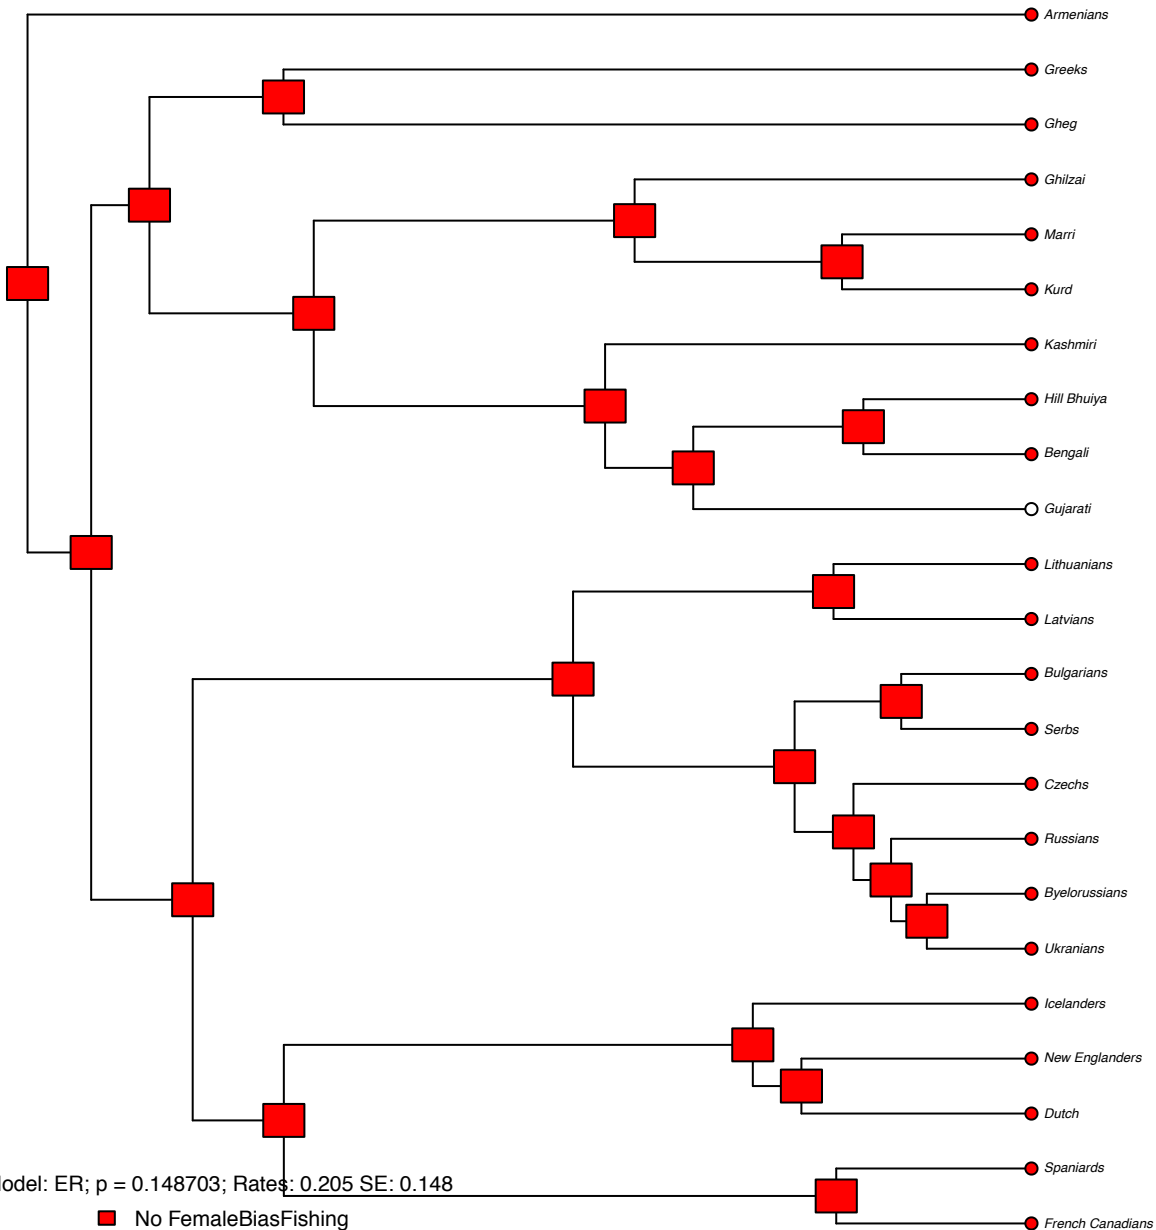

Armenians

Greeks

Ghag

Ghilzai

Marri

Kurd

Kashmiri

Hill Bhuiya

Bengali

Gujarati

Lithuanians

Latvians

Bulgarians

Serbs

Czechs

Russians

Byelorussians

Ukrainians

Icelanders

New Englanders

Dutch

Spaniards

French Canadians

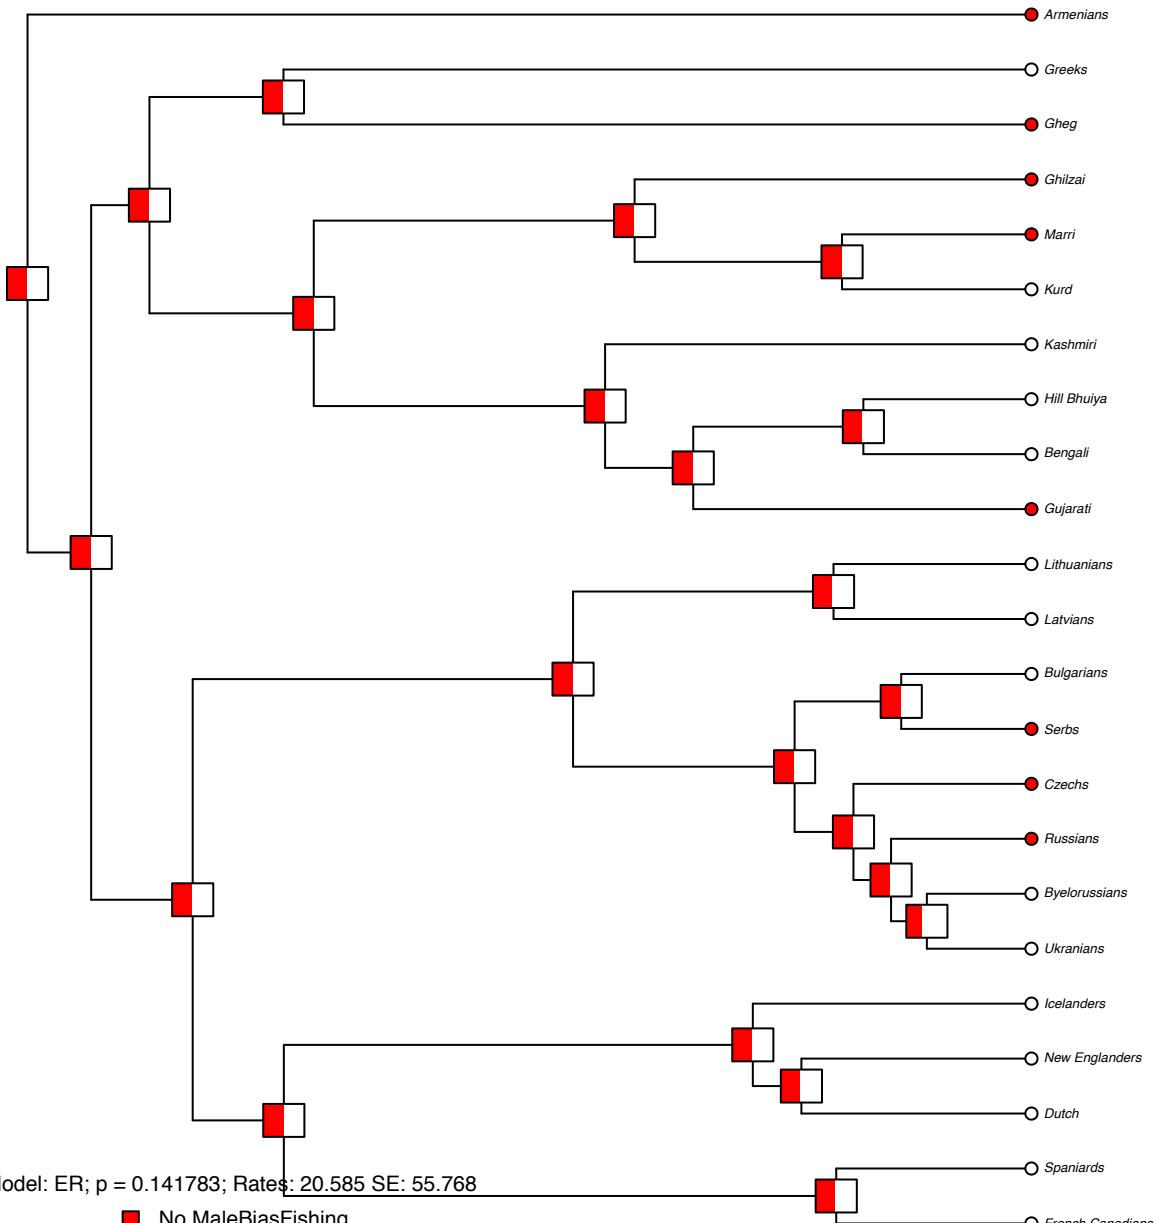

Model: ER;  $p = 0.141783$ ; Rates: 20.585 SE: 55.768

■ No MaleBiasFishing  
 MaleBiasFishing

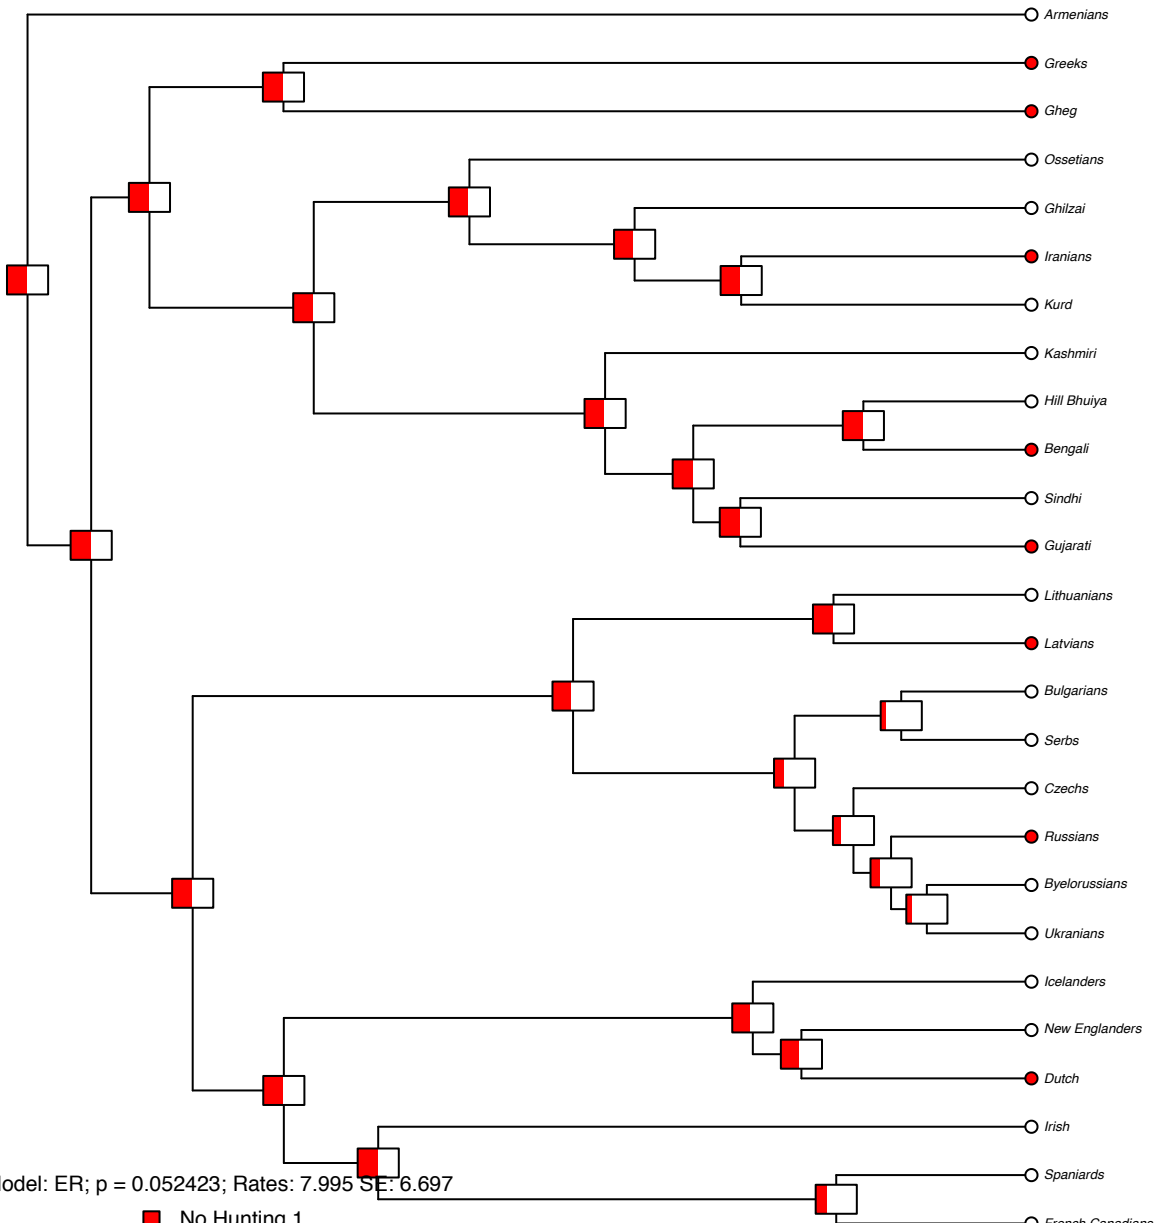

Model: ER;  $p = 0.052423$ ; Rates: 7.995 SE: 6.697

■ No Hunting.1  
 □ Hunting.1

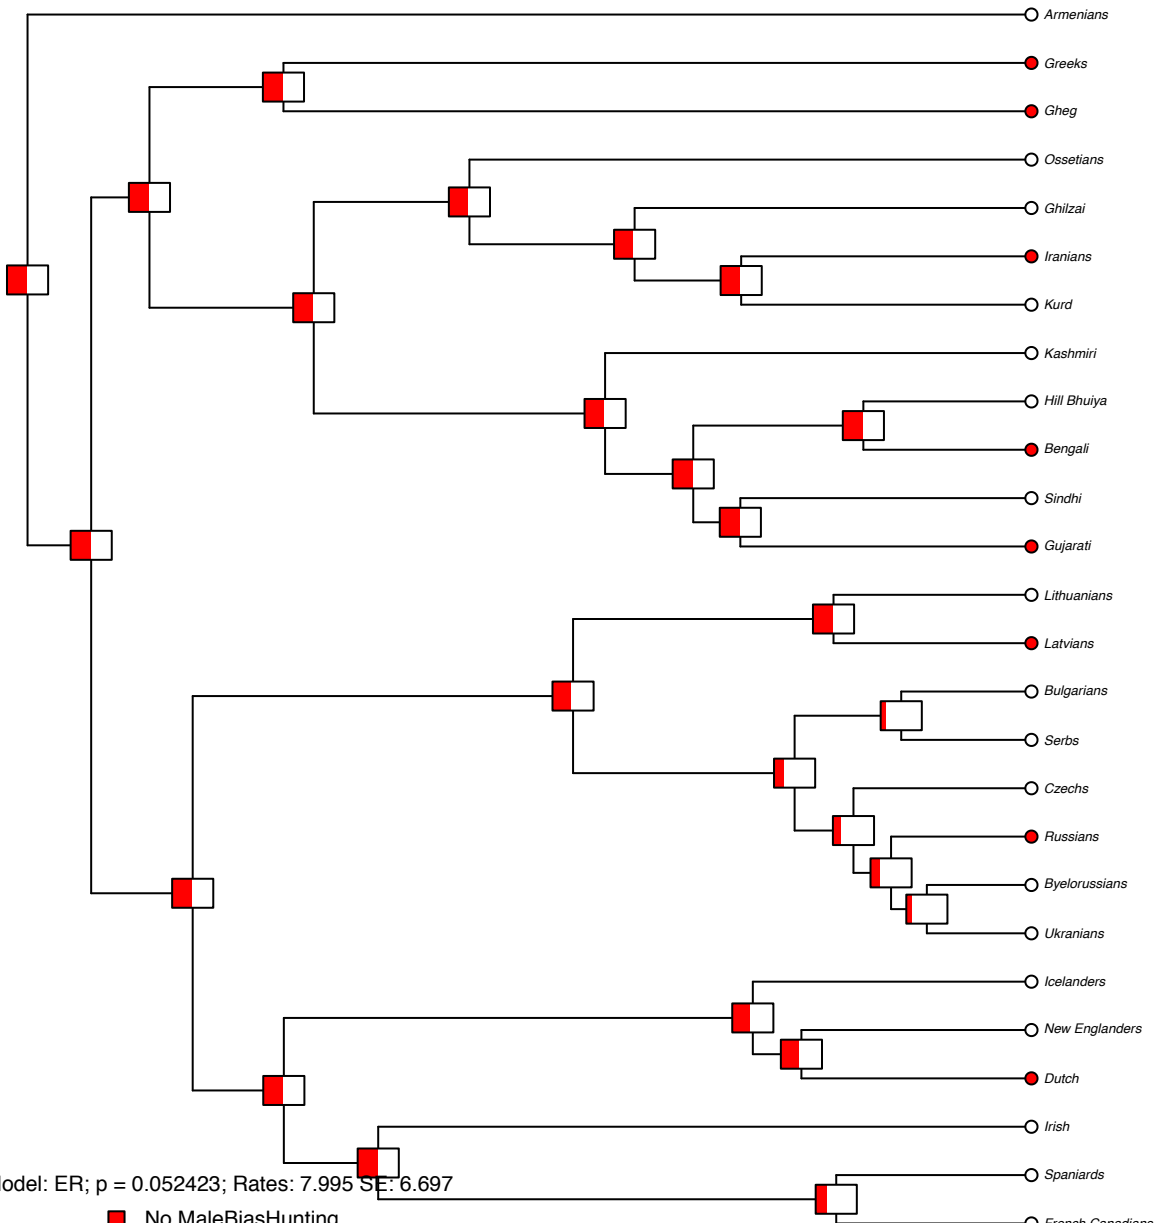

Model: ER;  $p = 0.052423$ ; Rates: 7.995 SE: 6.697

■ No MaleBiasHunting  
 MaleBiasHunting



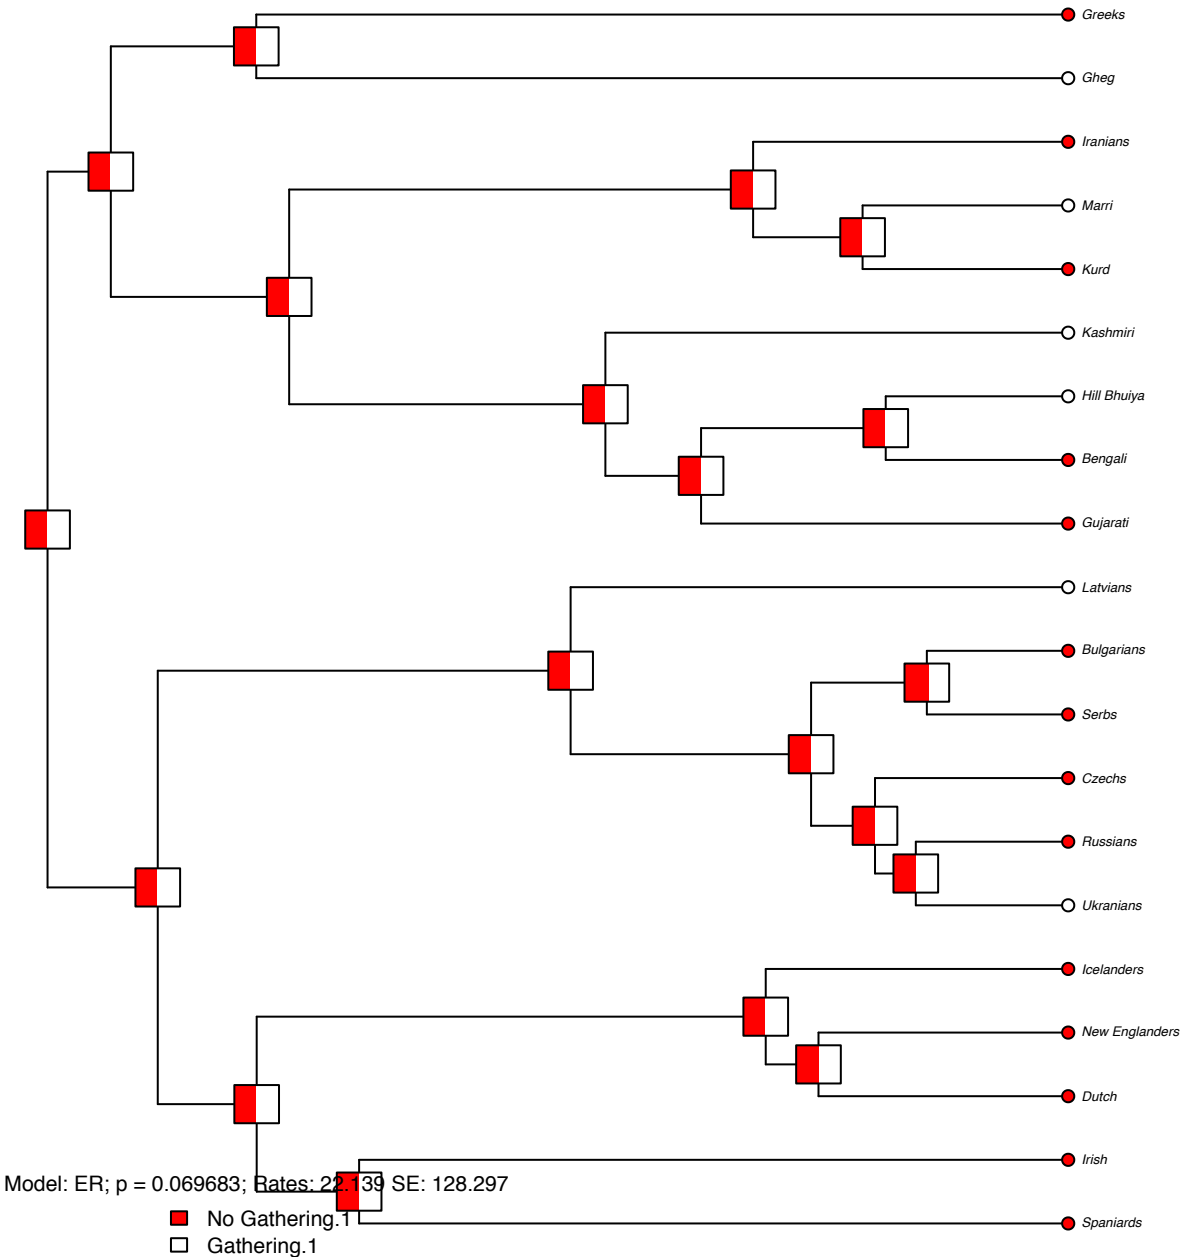

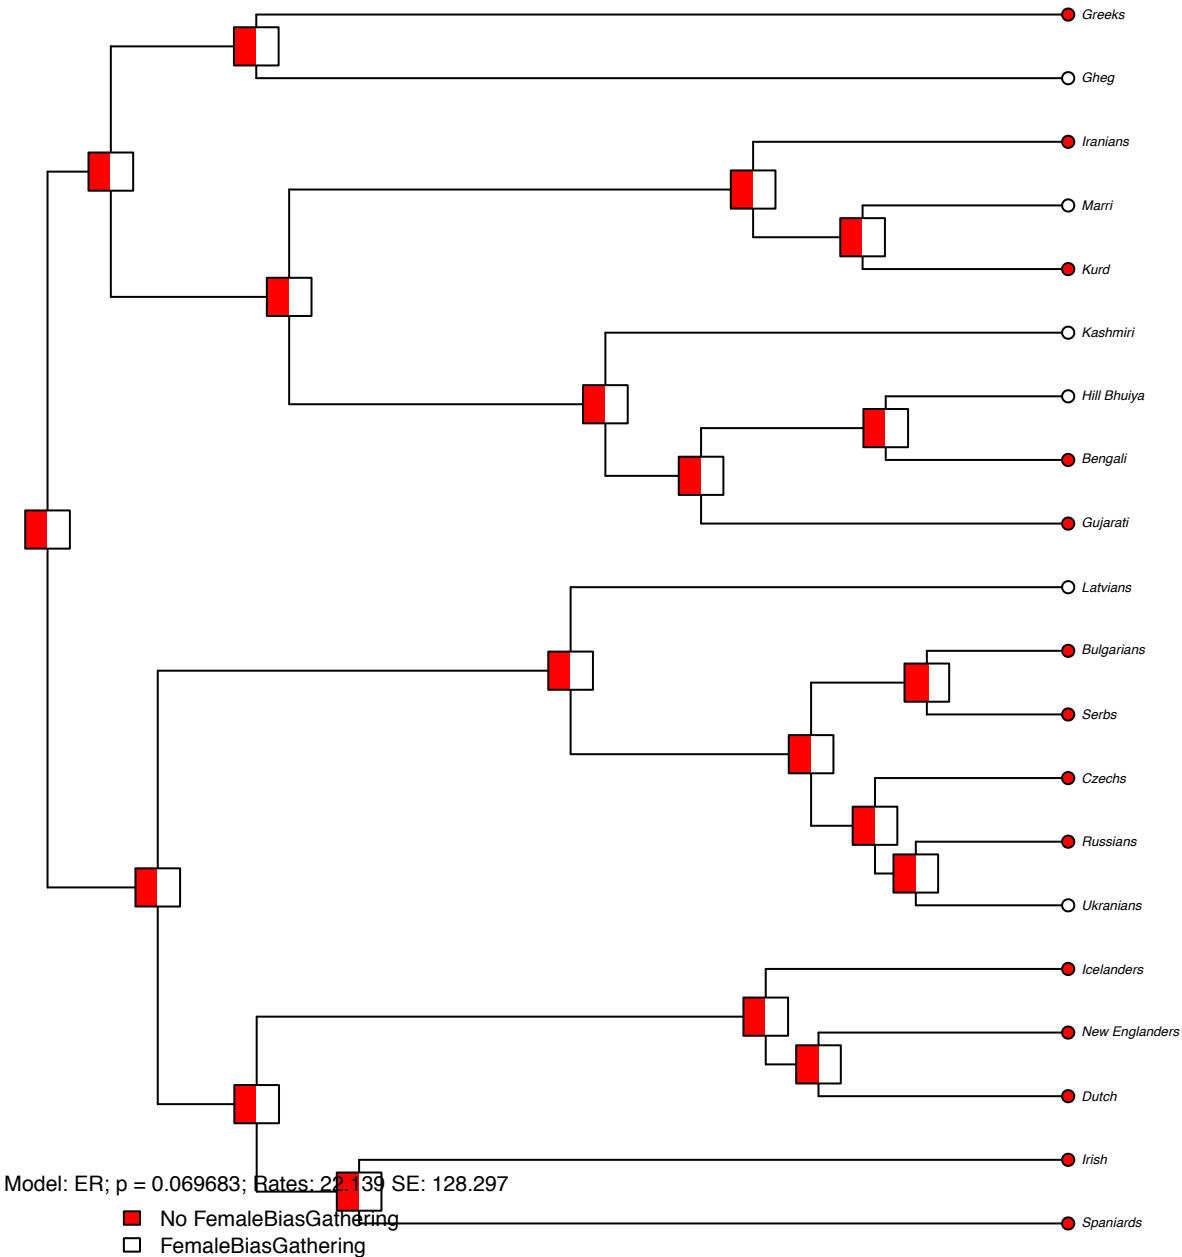

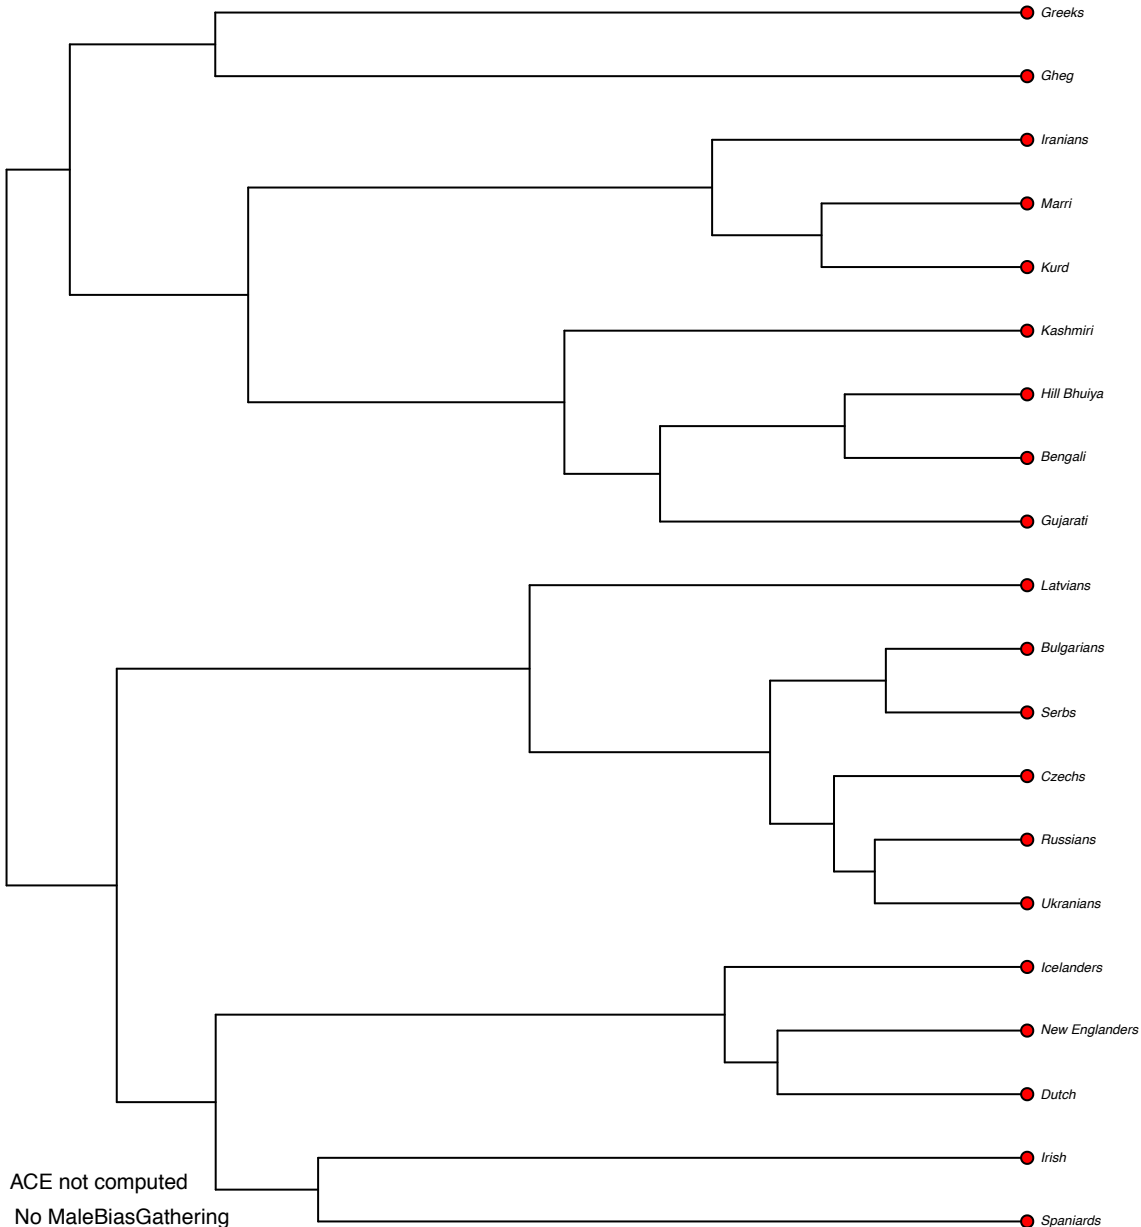

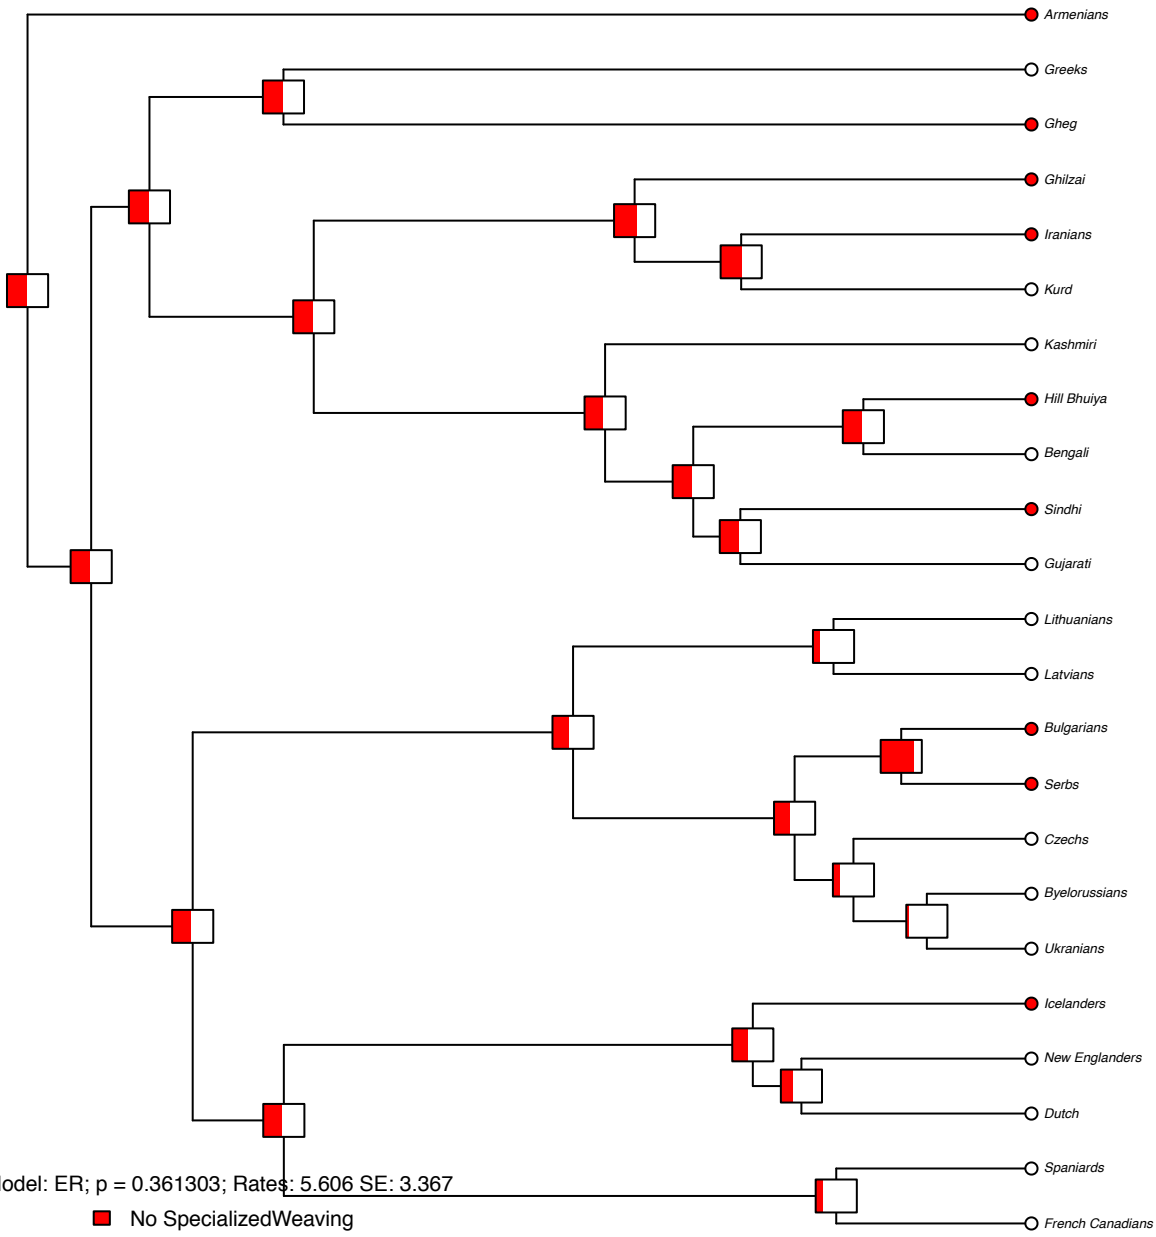

Model: ER;  $p = 0.361303$ ; Rates: 5.606 SE: 3.367

■ No SpecializedWeaving  
 SpecializedWeaving

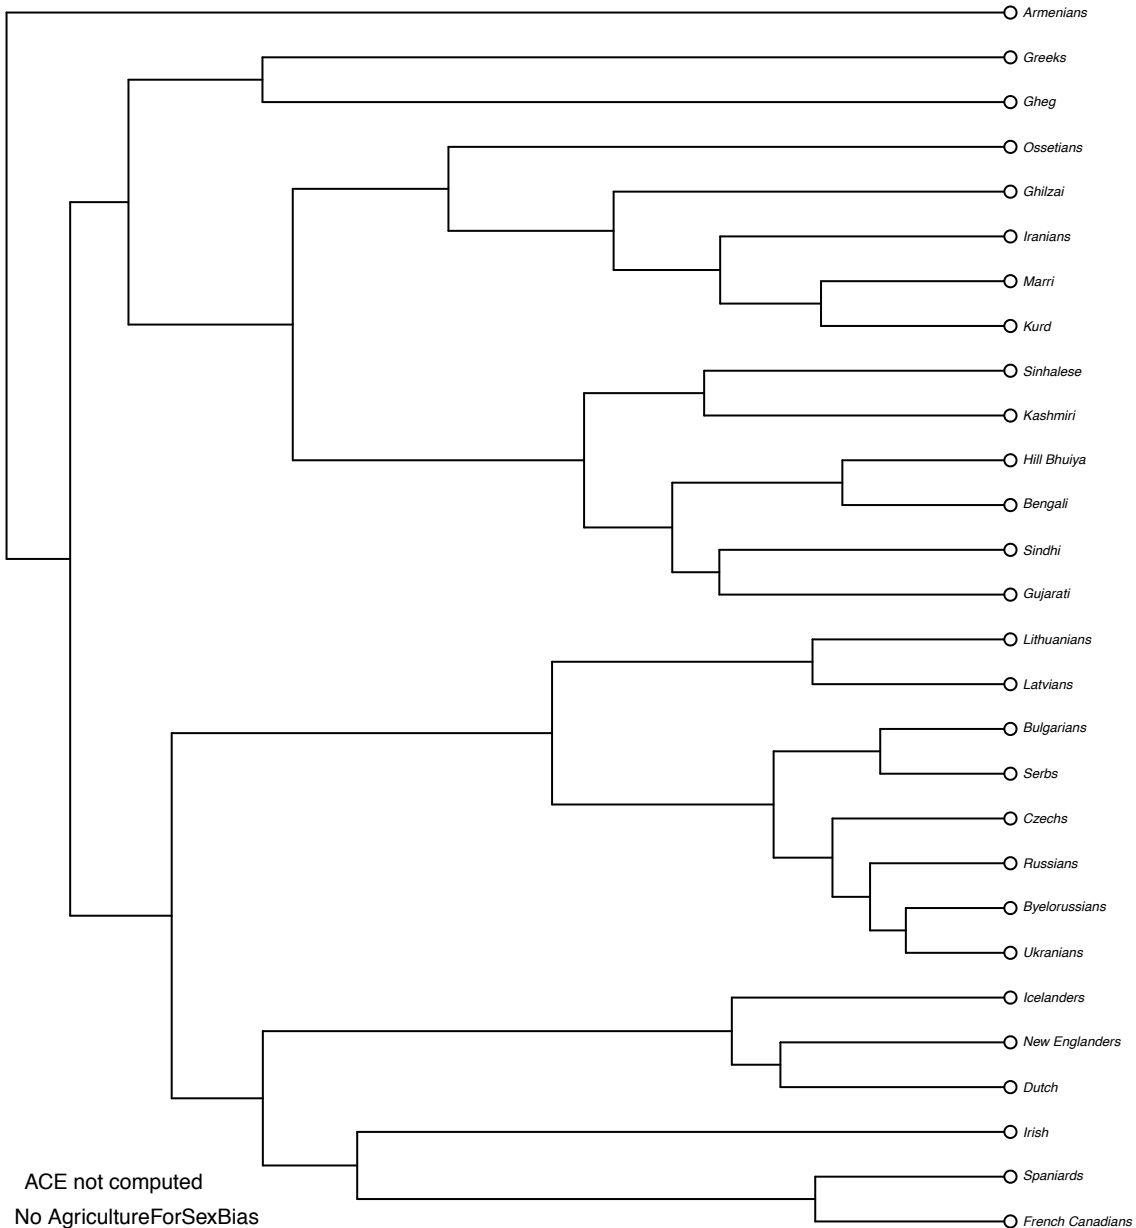

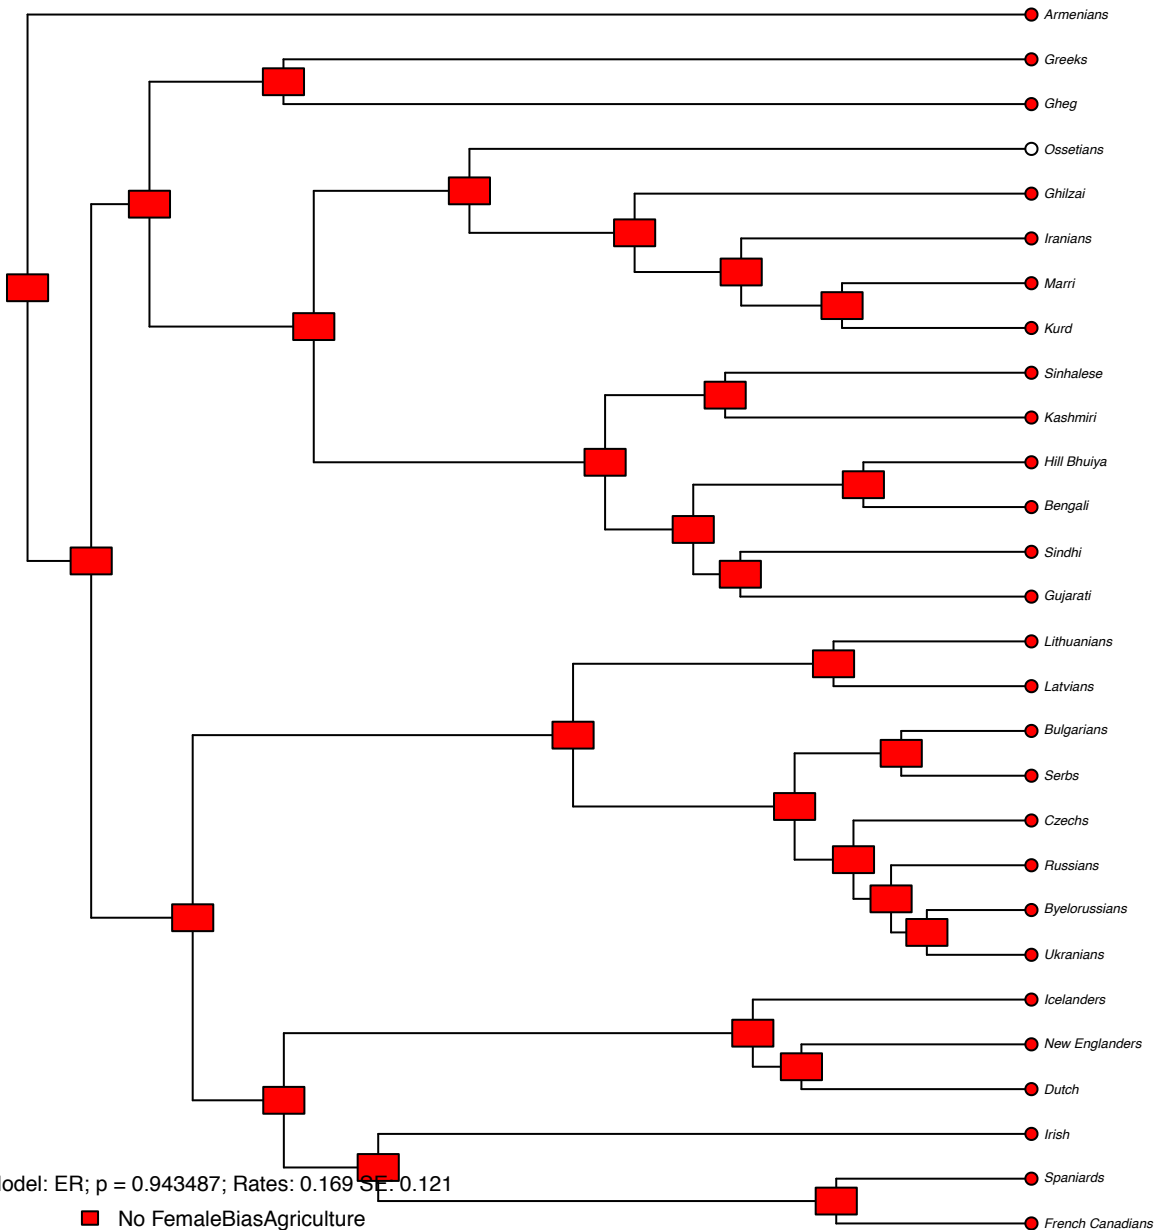

- Armenians
- Greeks
- Ghzeg
- Ossetians
- Ghilzai
- Iranians
- Marri
- Kurd
- Sinhalese
- Kashmiri
- Hill Bhuiya
- Bengali
- Sindhi
- Gujarati
- Lithuanians
- Latvians
- Bulgarians
- Serbs
- Czechs
- Russians
- Byelorussians
- Ukrainians
- Icelanders
- New Englanders
- Dutch
- Irish
- Spaniards
- French Canadians

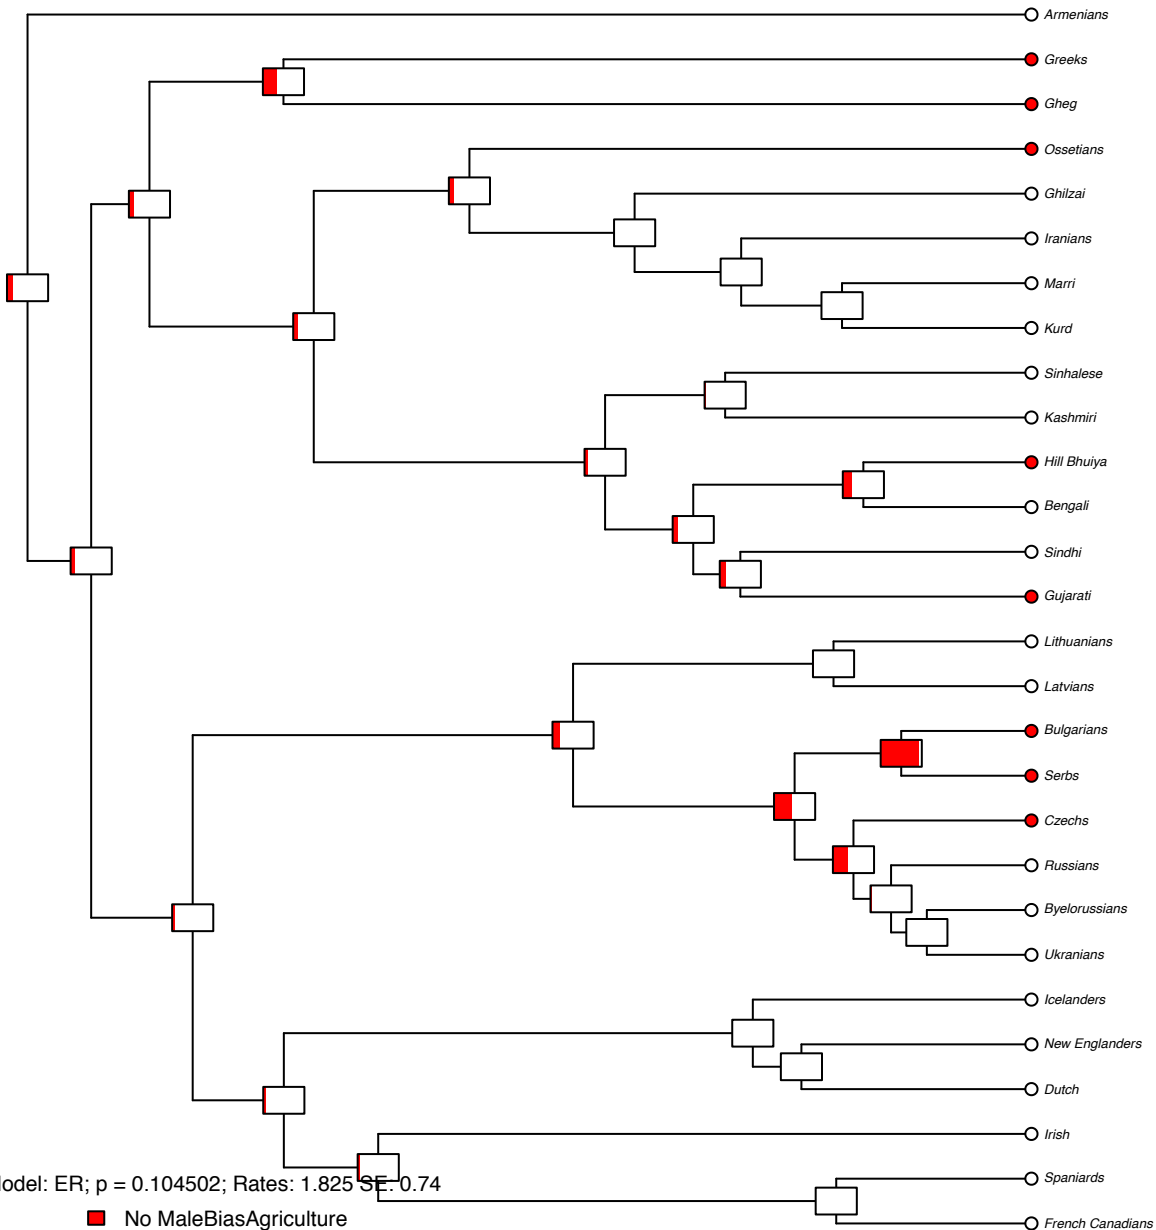

Model: ER;  $p = 0.104502$ ; Rates: 1.825 SE: 0.74

- No MaleBiasAgriculture
- MaleBiasAgriculture

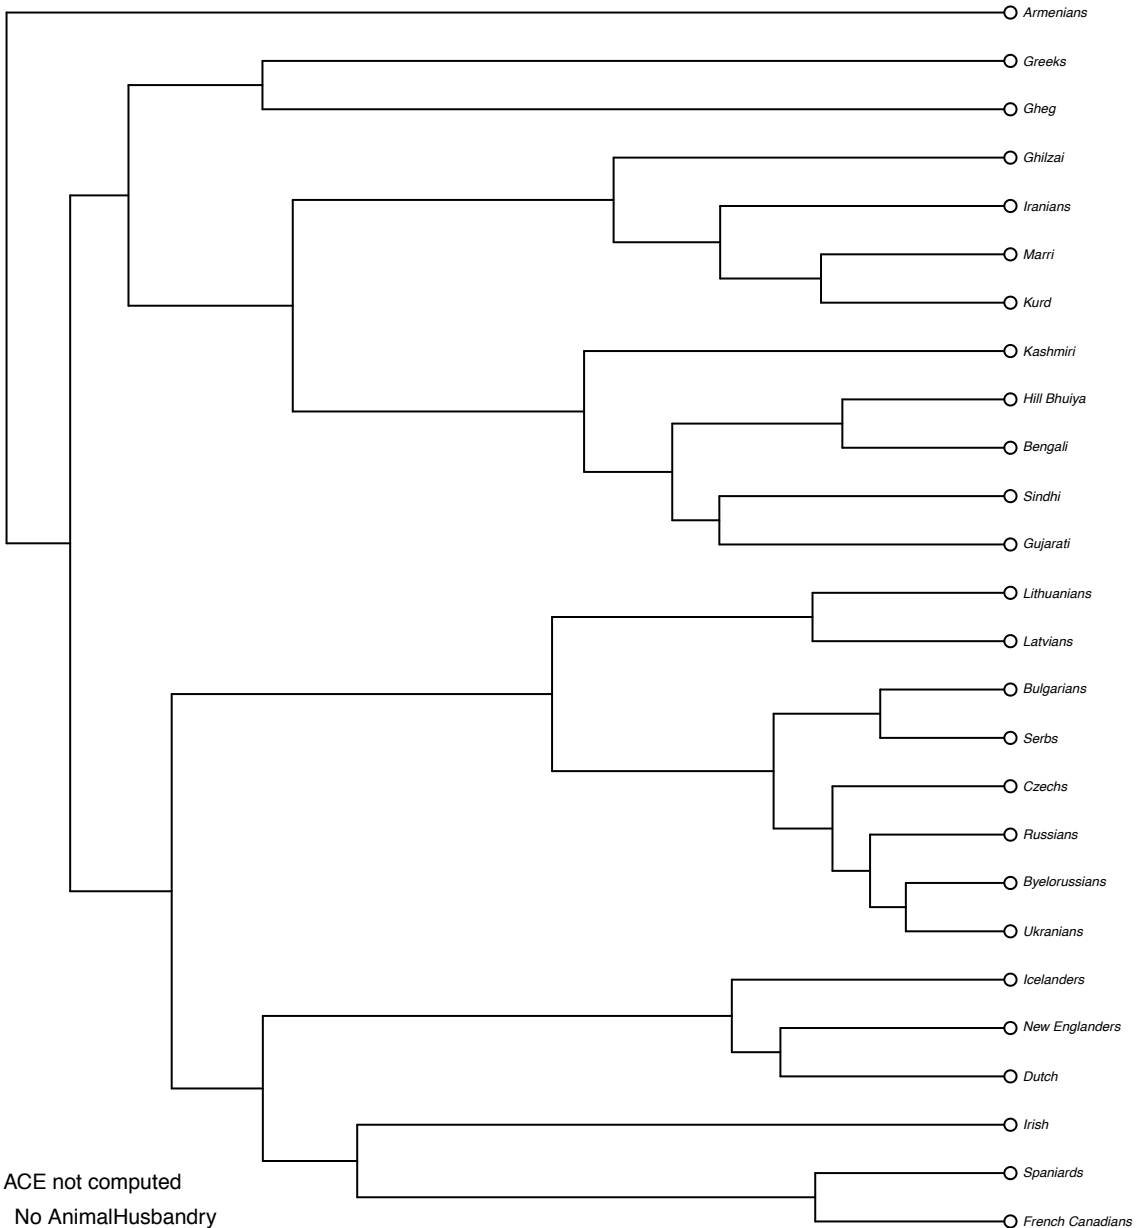



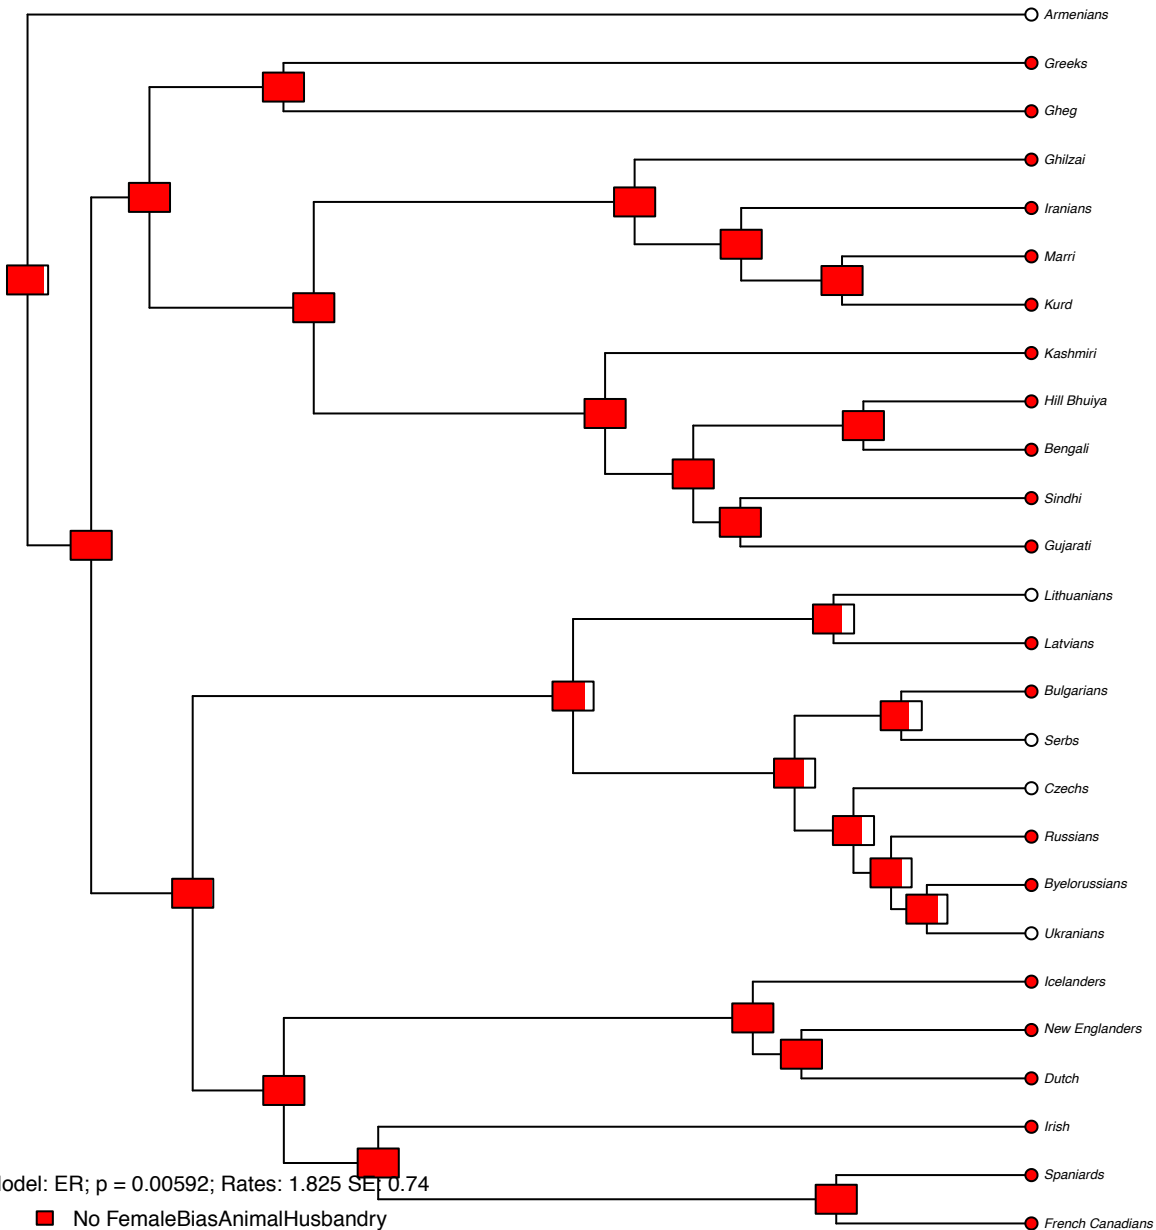

- Armenians
- Greeks
- Gheg
- Ghilzai
- Iranians
- Marri
- Kurd
- Kashmiri
- Hill Bhuiya
- Bengali
- Sindhi
- Gujarati
- Lithuanians
- Latvians
- Bulgarians
- Serbs
- Czechs
- Russians
- Byelorussians
- Ukrainians
- Icelanders
- New Englanders
- Dutch
- Irish
- Spaniards
- French Canadians

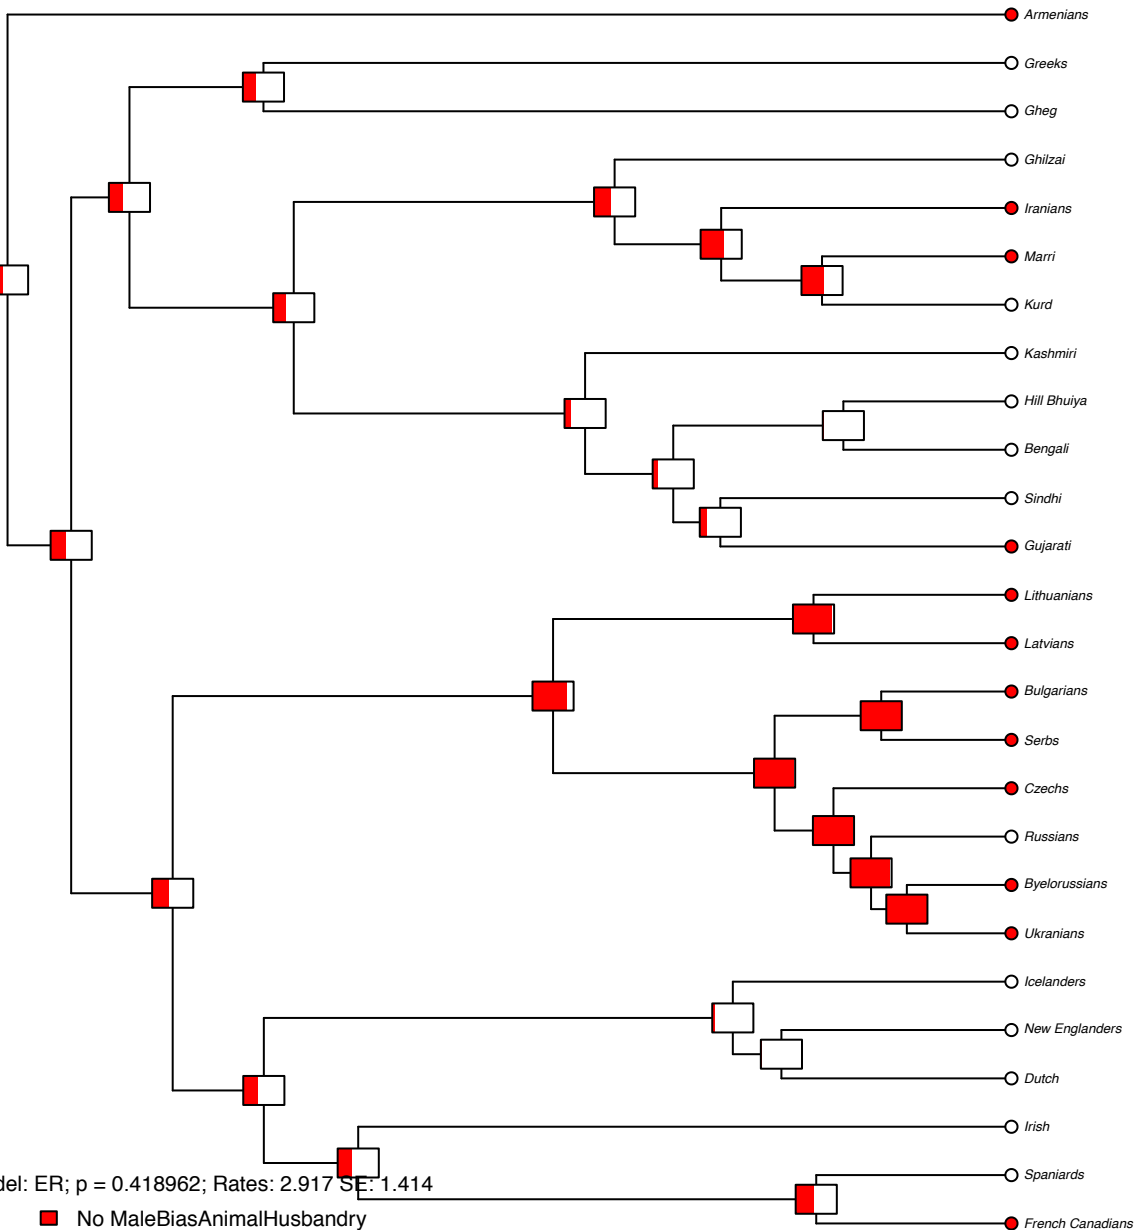

- Armenians
- Greeks
- Ghag
- Ghilzai
- Iranians
- Marri
- Kurd
- Kashmiri
- Hill Bhuiya
- Bengali
- Sindhi
- Gujarati
- Lithuanians
- Latvians
- Bulgarians
- Serbs
- Czechs
- Russians
- Byelorussians
- Ukrainians
- Icelanders
- New Englanders
- Dutch
- Irish
- Spaniards
- French Canadians

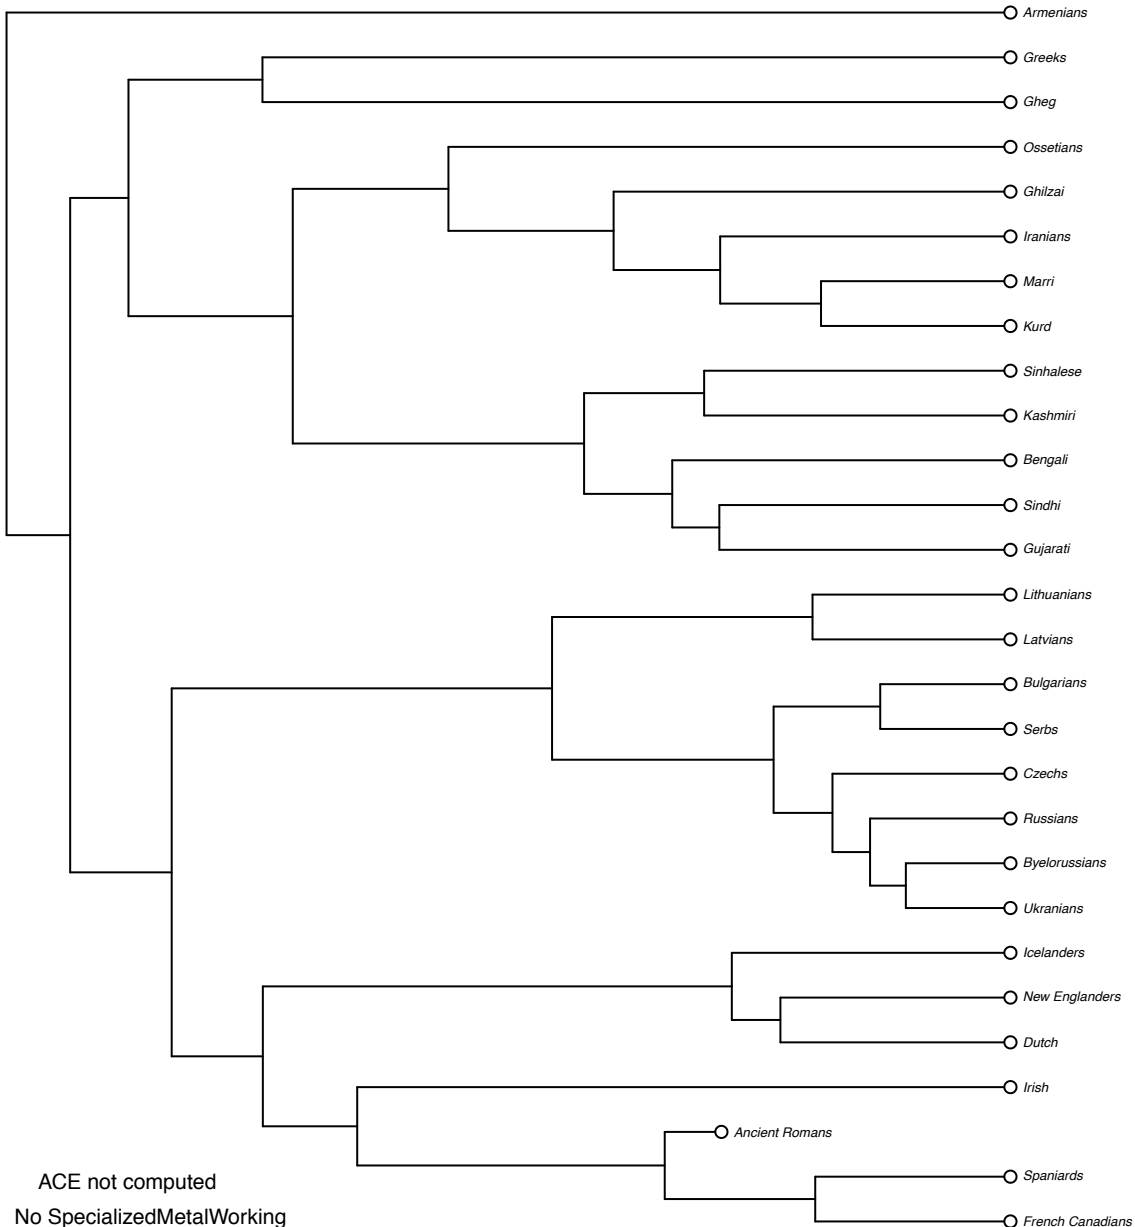

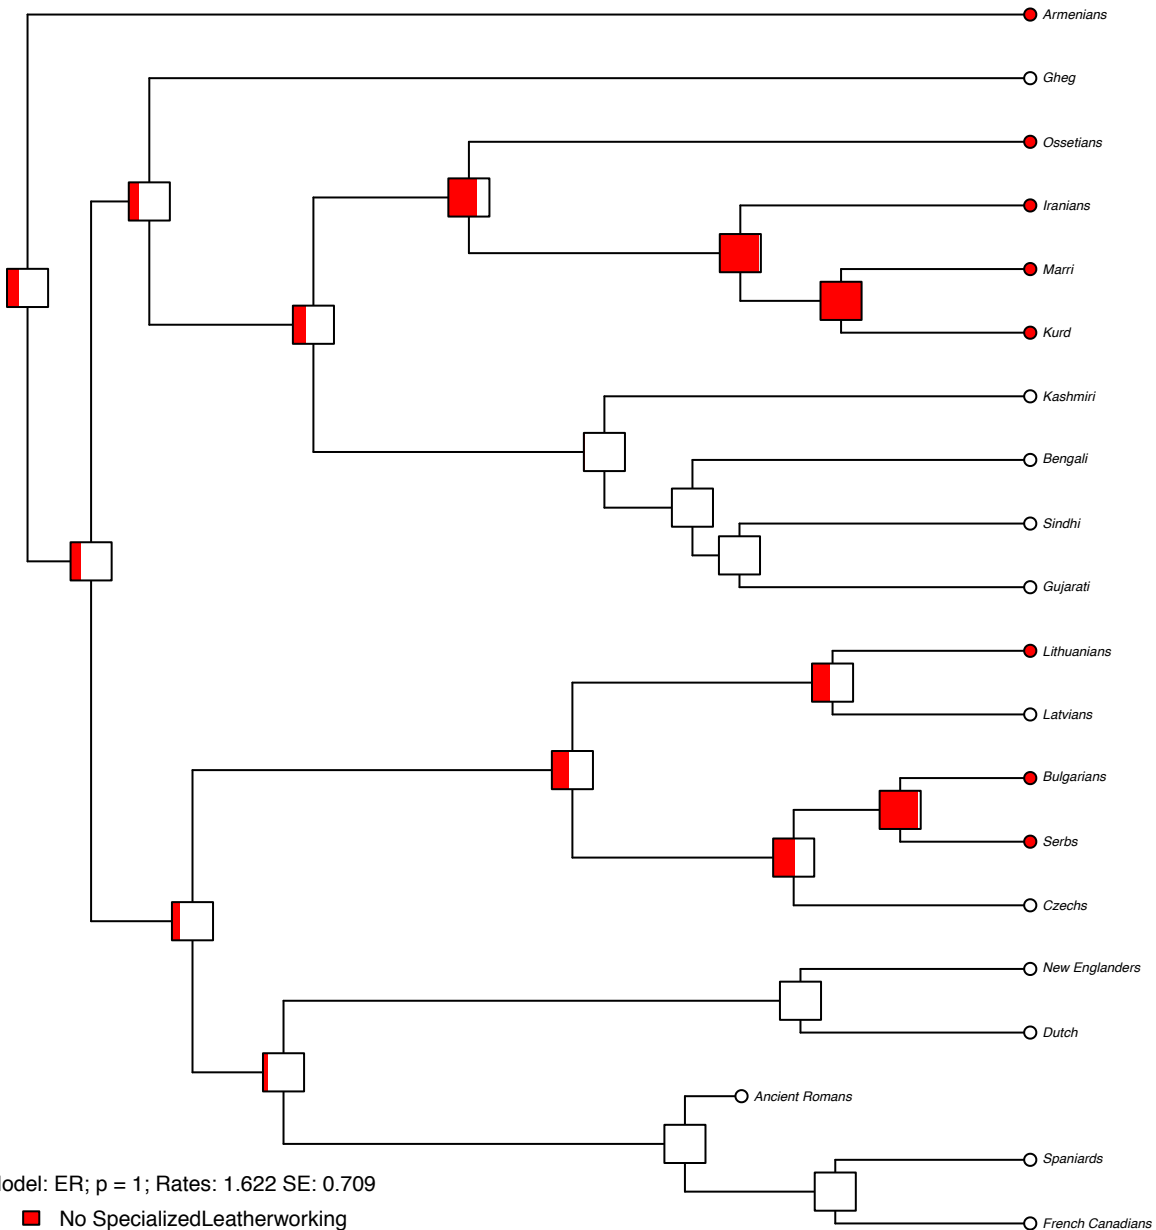

Model: ER;  $p = 1$ ; Rates: 1.622 SE: 0.709

- No SpecializedLeatherworking
- SpecializedLeatherworking

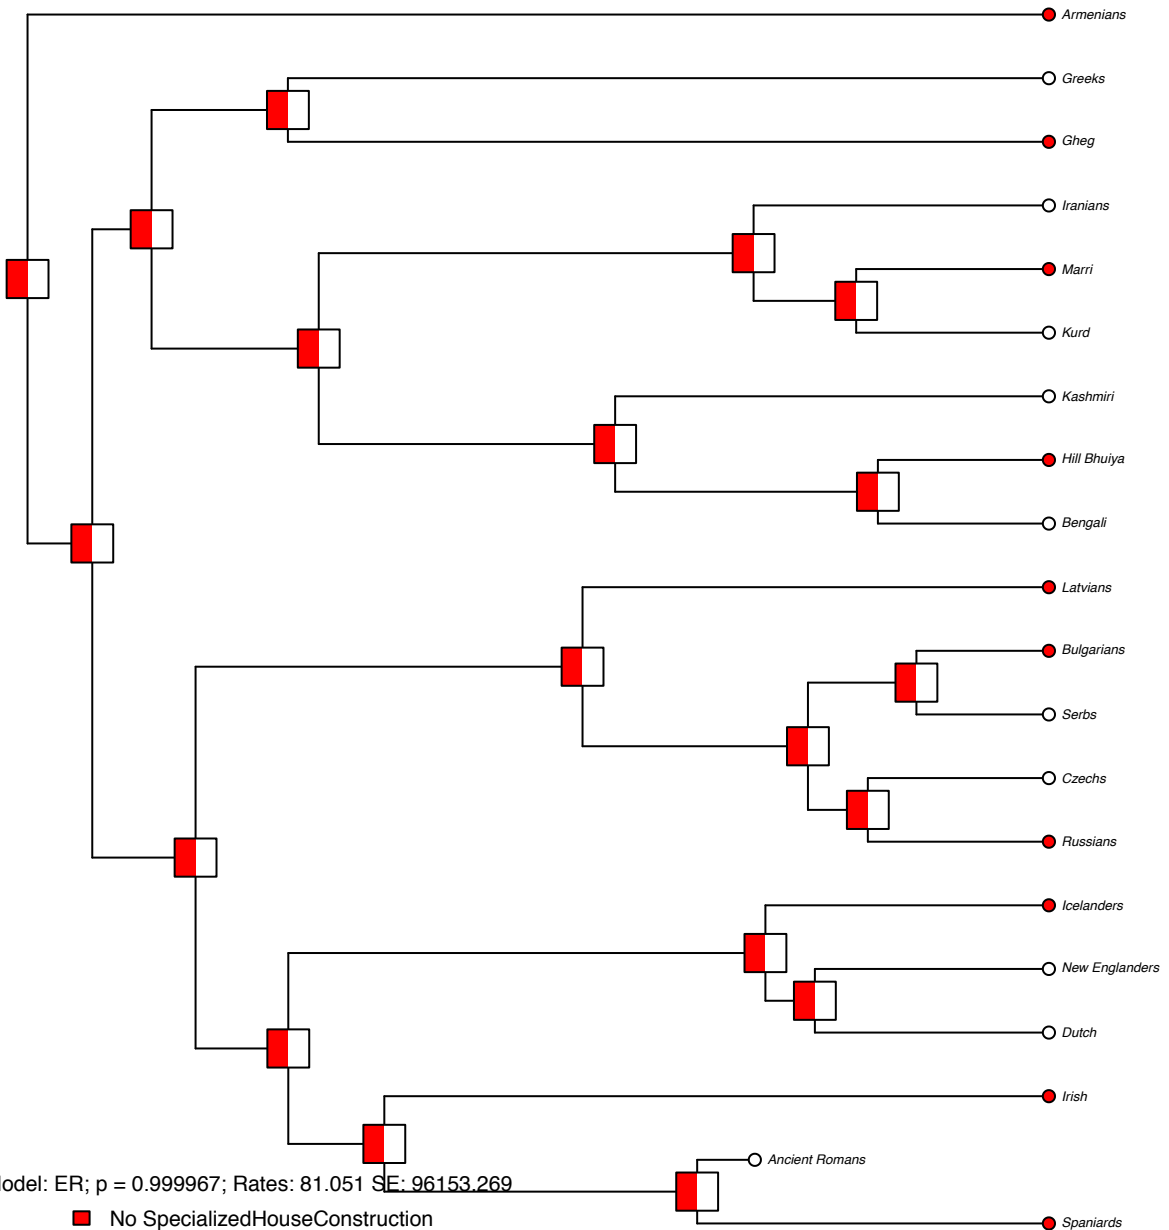

- Armenians
- Greeks
- Ghag
- Iranians
- Marri
- Kurd
- Kashmiri
- Hill Bhuiya
- Bengali
- Latvians
- Bulgarians
- Serbs
- Czechs
- Russians
- Icelanders
- New Englanders
- Dutch
- Irish
- Ancient Romans
- Spaniards

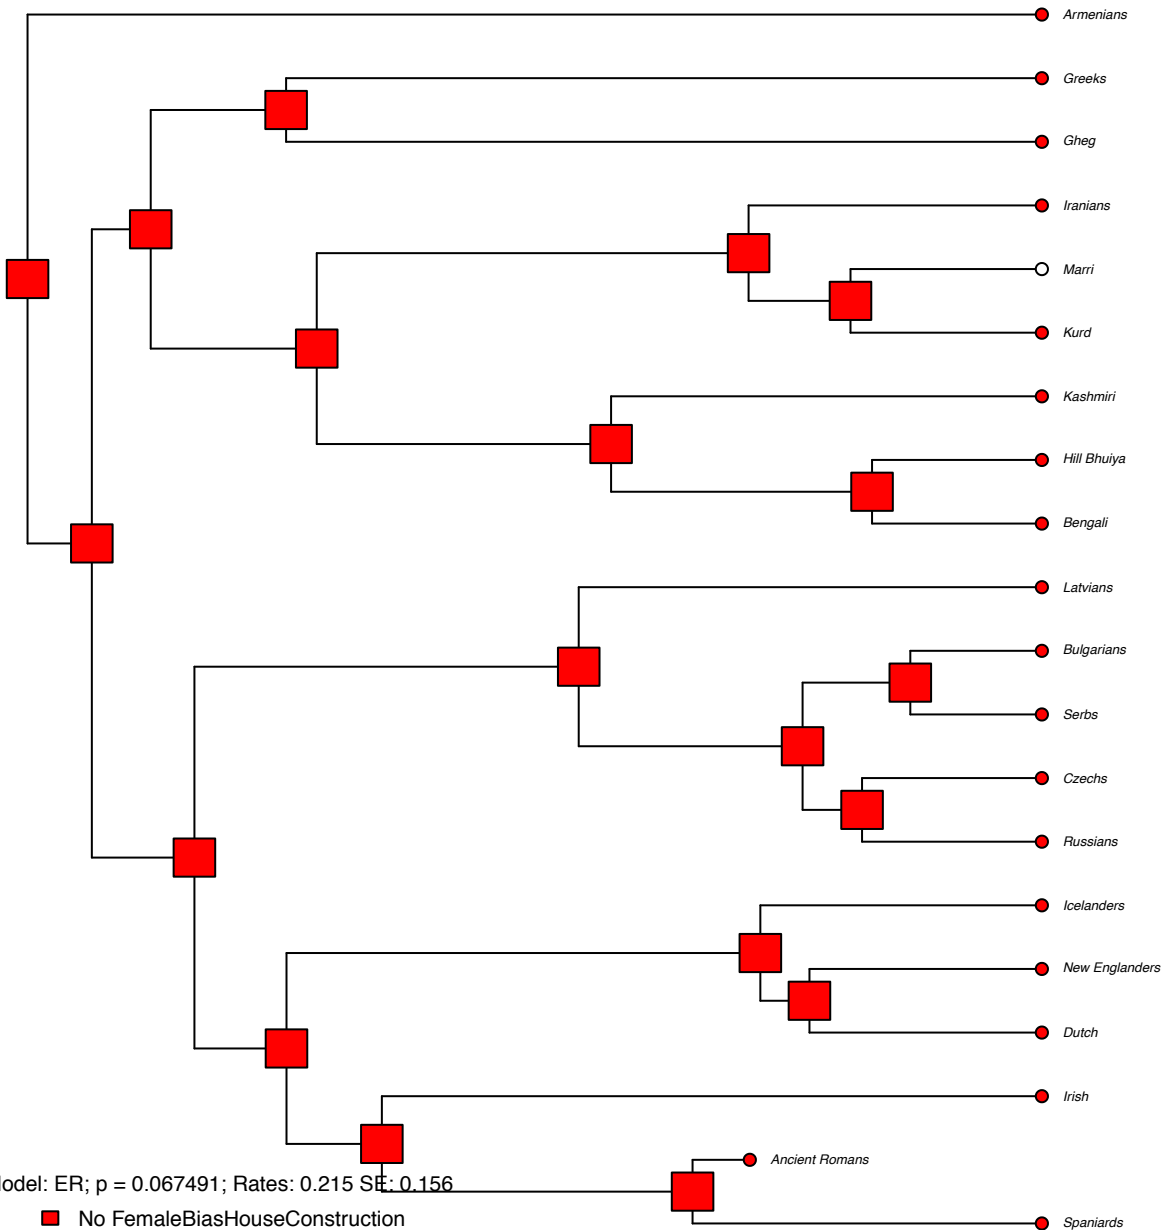

Armenians

Greeks

Ghneg

Iranians

Marri

Kurd

Kashmiri

Hill Bhuiya

Bengali

Latvians

Bulgarians

Serbs

Czechs

Russians

Icelanders

New Englanders

Dutch

Irish

Ancient Romans

Spaniards

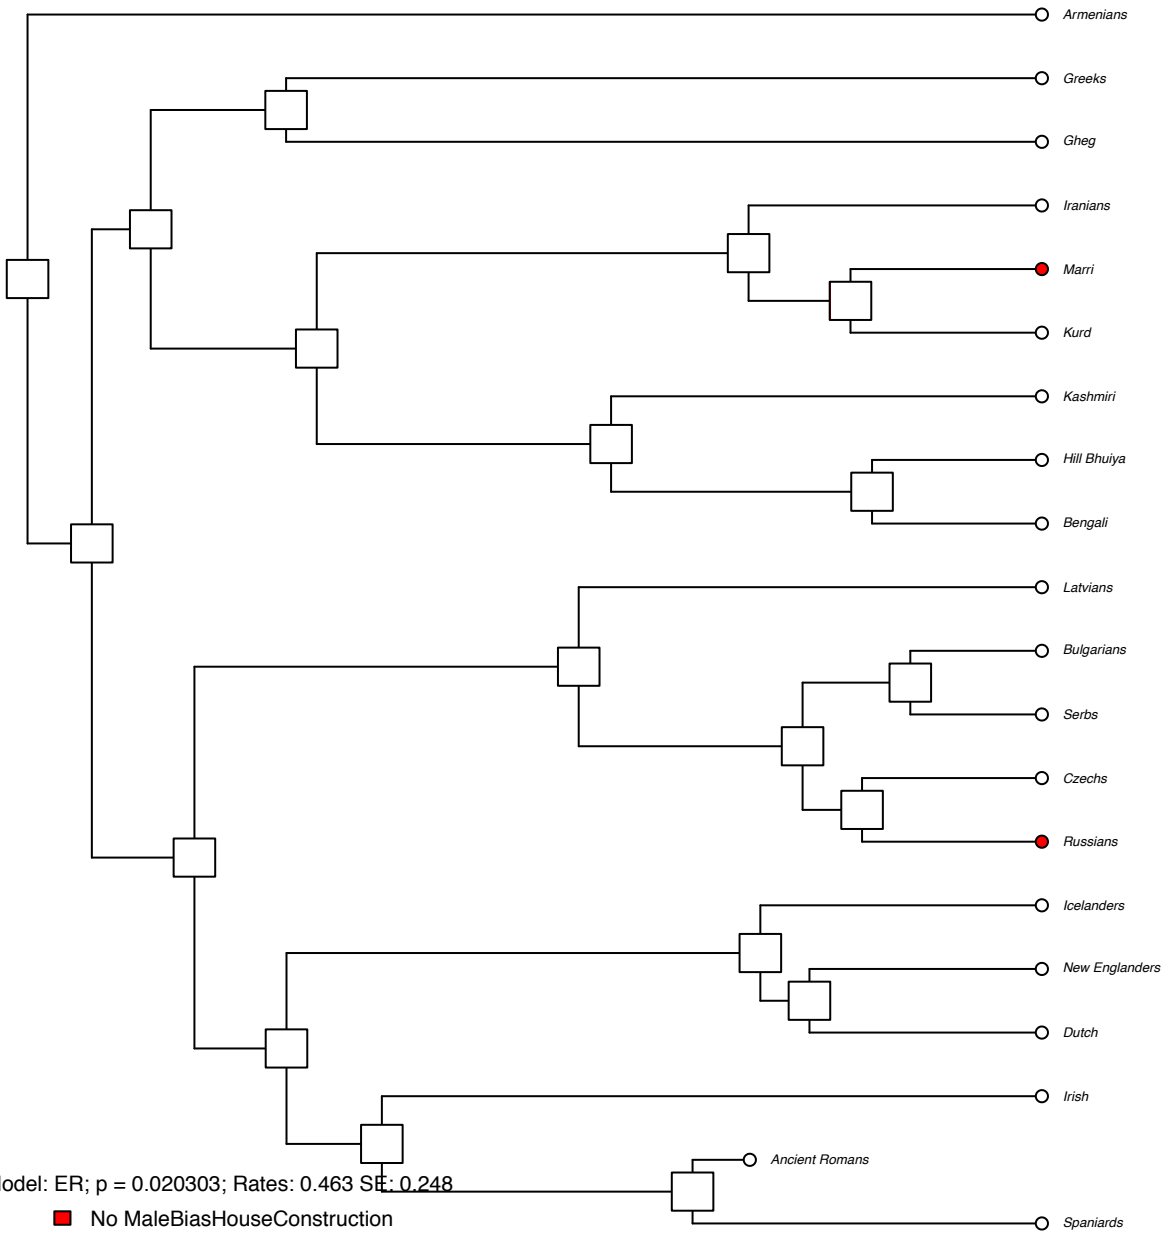

Model: ER;  $p = 0.020303$ ; Rates: 0.463 SE: 0.248

- No MaleBiasHouseConstruction
- MaleBiasHouseConstruction

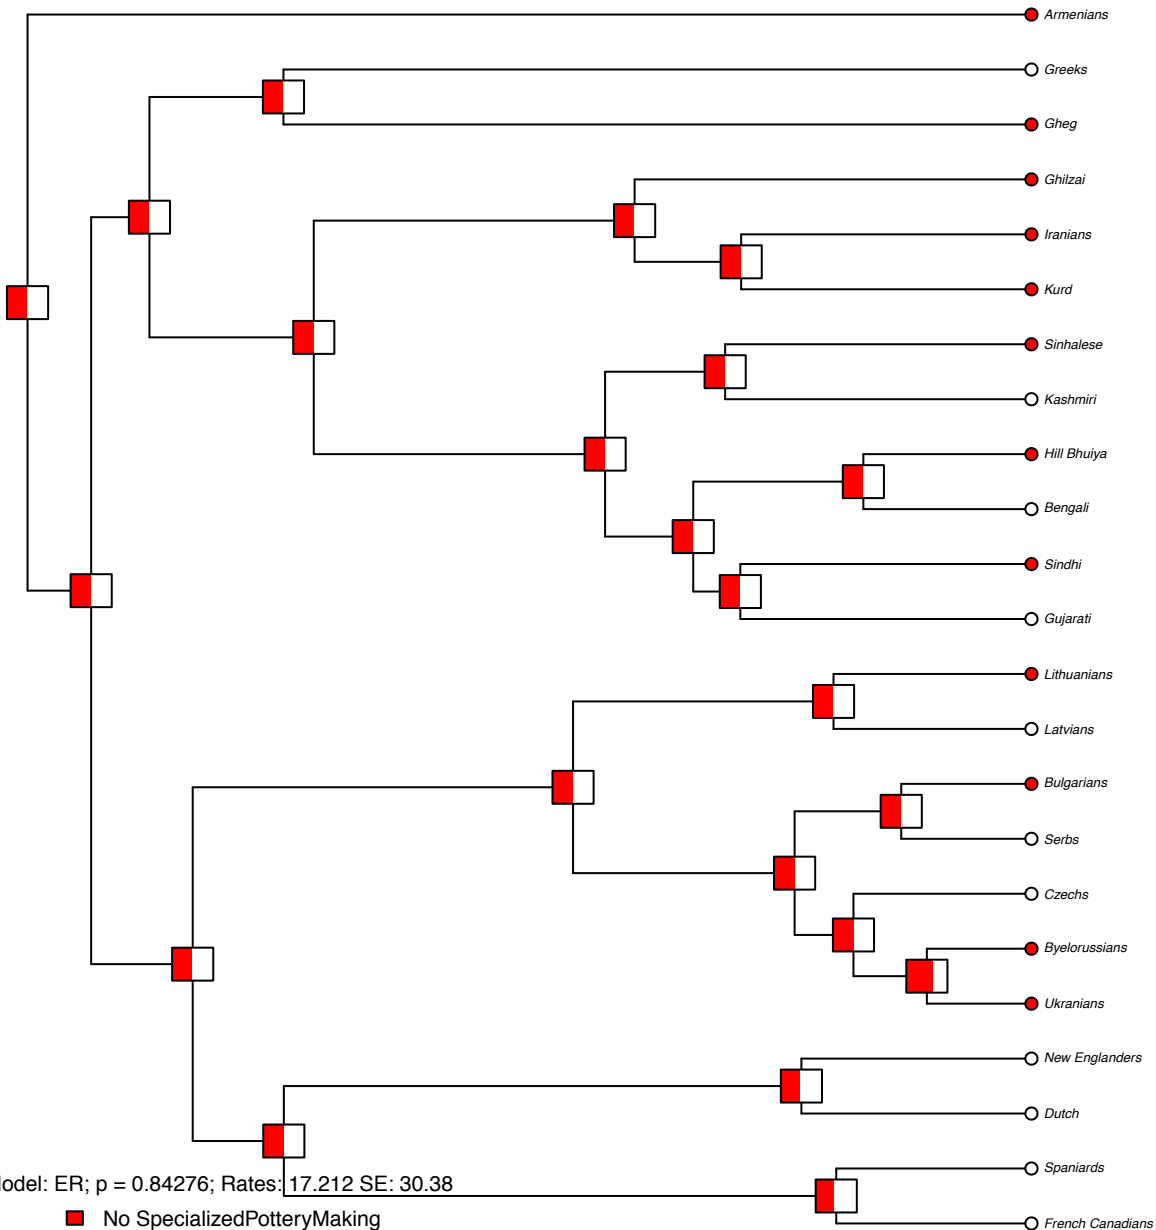



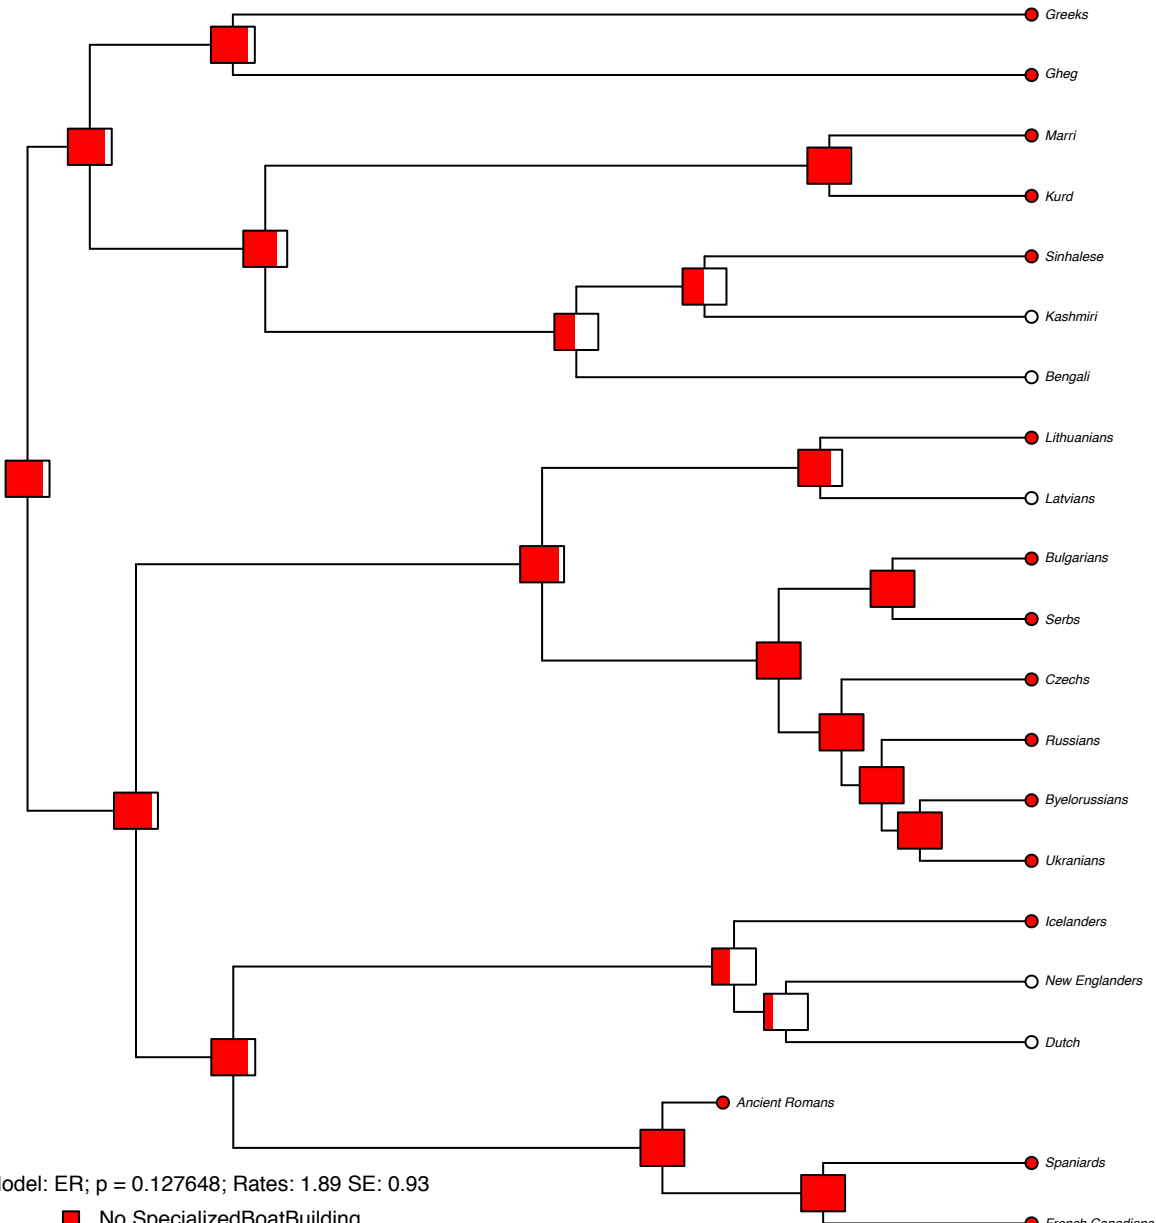

Model: ER;  $p = 0.127648$ ; Rates: 1.89 SE: 0.93

- No SpecializedBoatBuilding
- SpecializedBoatBuilding

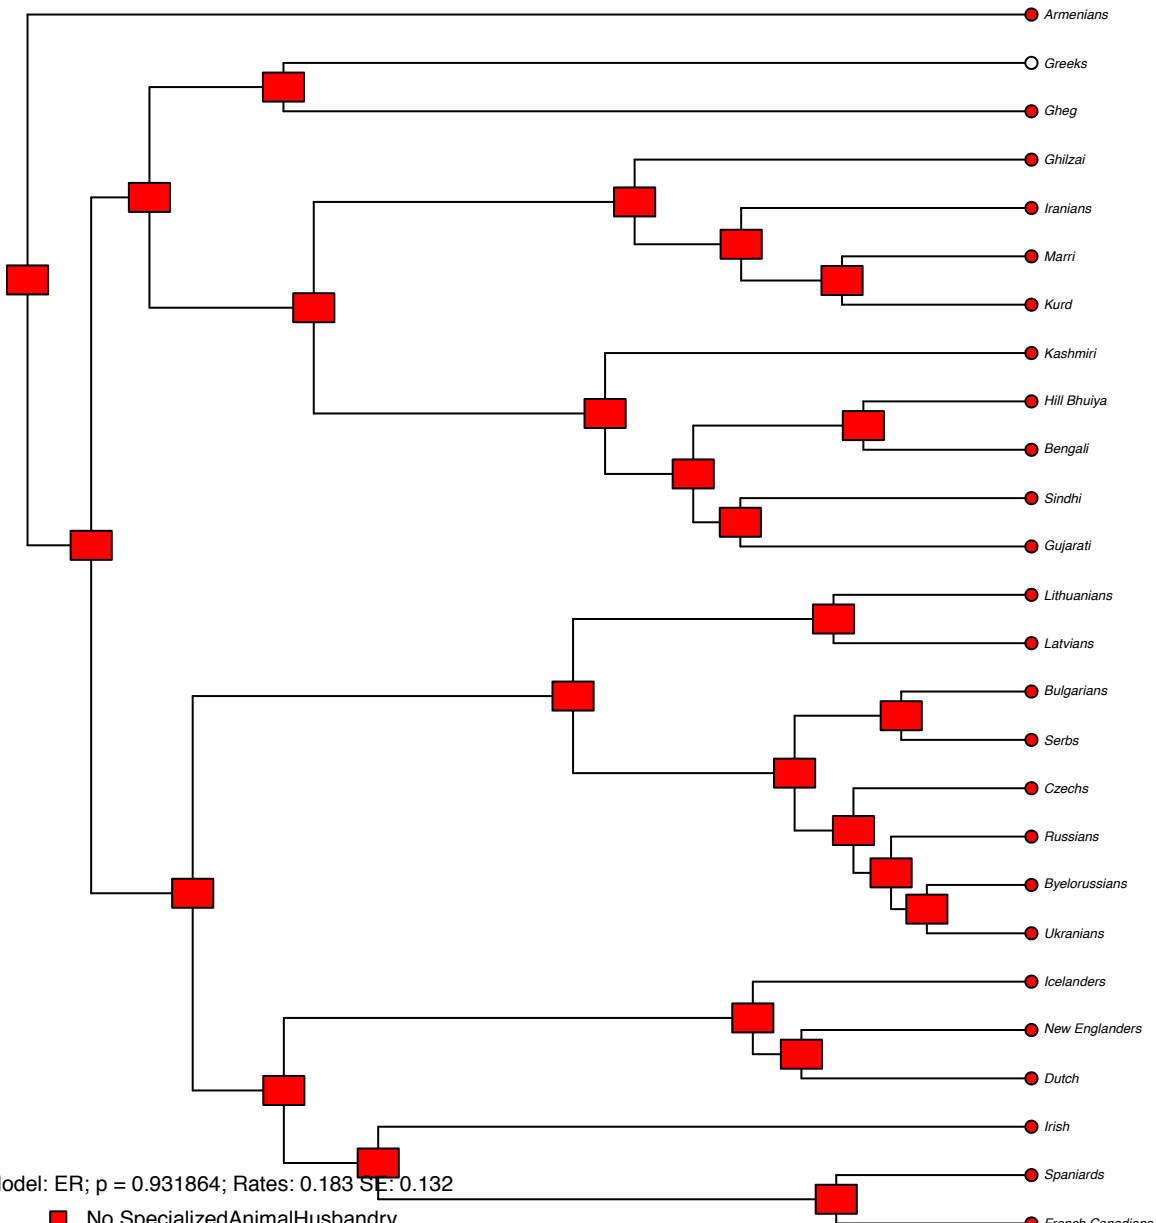

Model: ER;  $p = 0.931864$ ; Rates: 0.183 SE: 0.132

- No SpecializedAnimalHusbandry
- SpecializedAnimalHusbandry

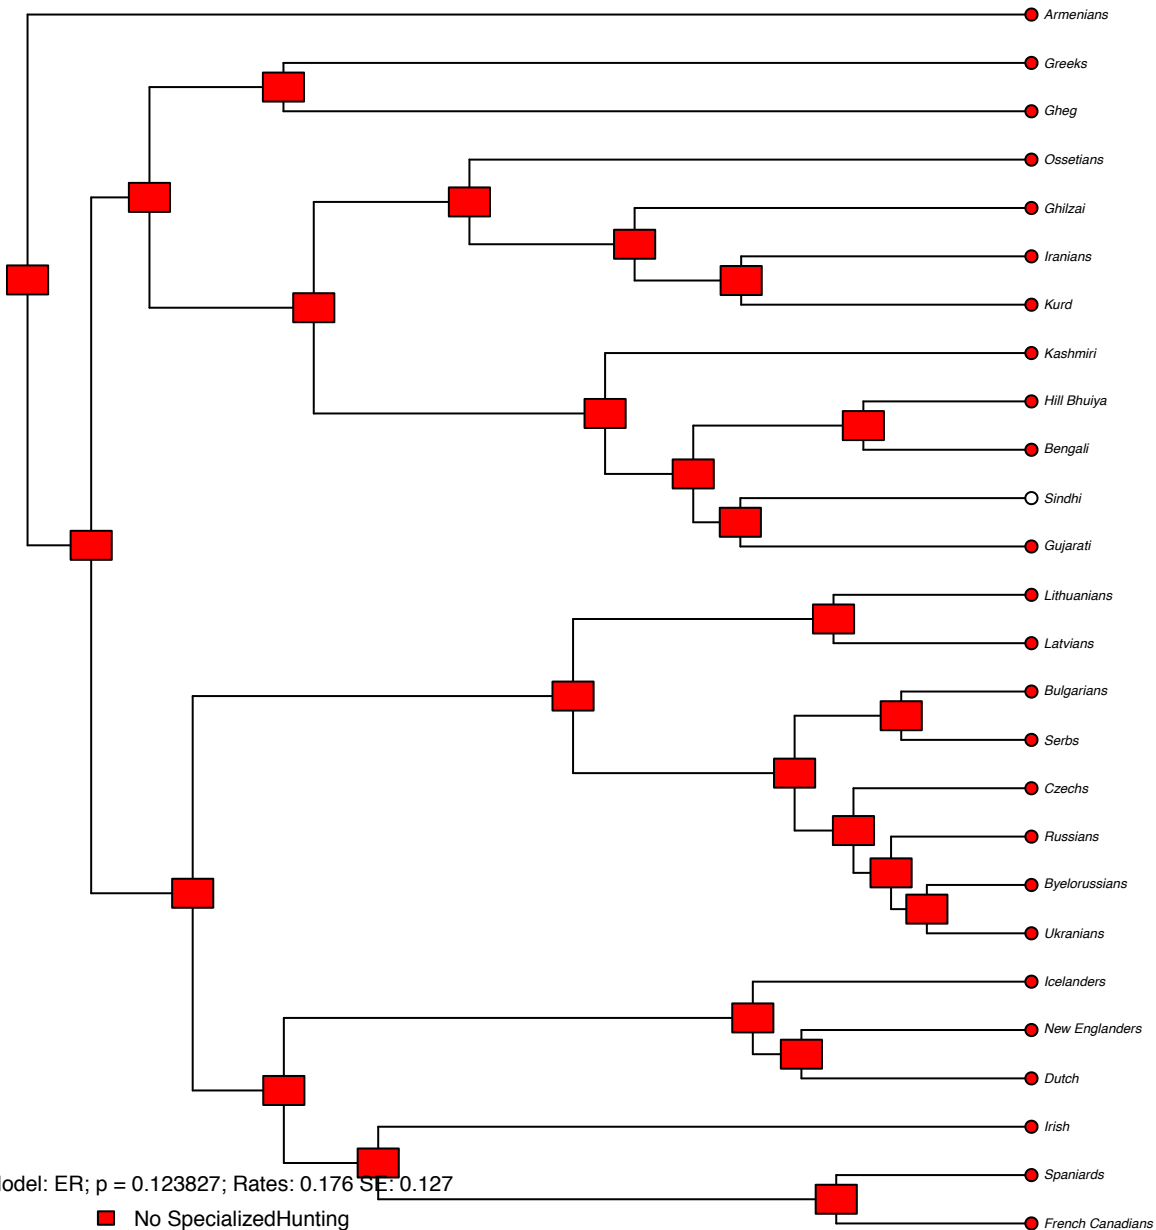

- Armenians
- Greeks
- Ghag
- Ossetians
- Ghilzai
- Iranians
- Kurd
- Kashmiri
- Hill Bhuiya
- Bengali
- Sindhi
- Gujarati
- Lithuanians
- Latvians
- Bulgarians
- Serbs
- Czechs
- Russians
- Byelorussians
- Ukrainians
- Icelanders
- New Englanders
- Dutch
- Irish
- Spaniards
- French Canadians

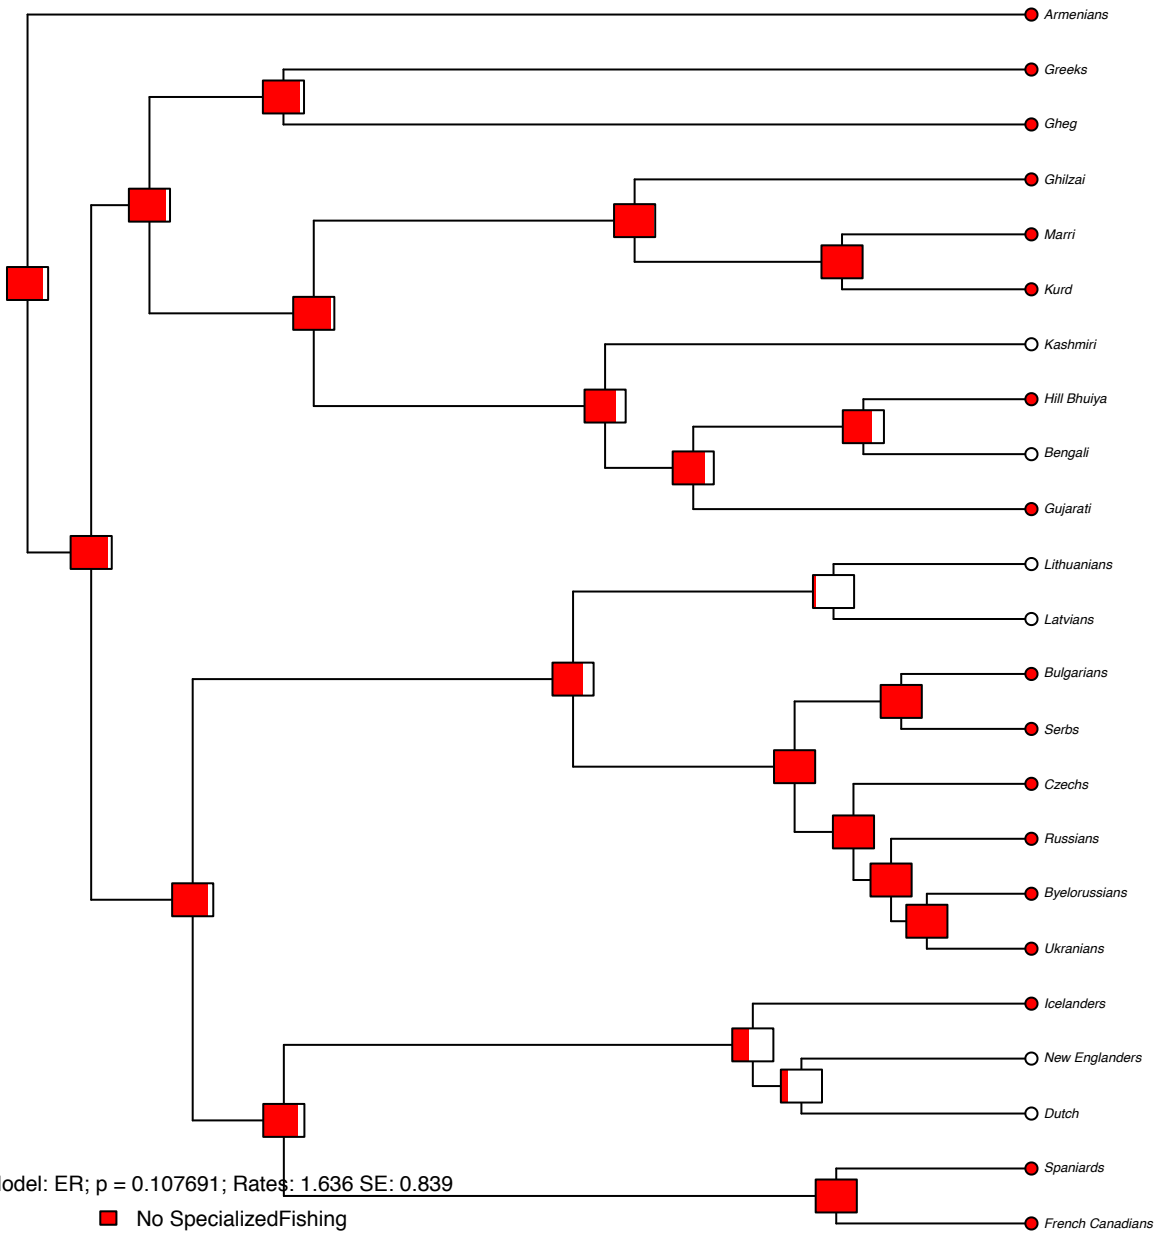

Model: ER;  $p = 0.107691$ ; Rates: 1.636 SE: 0.839

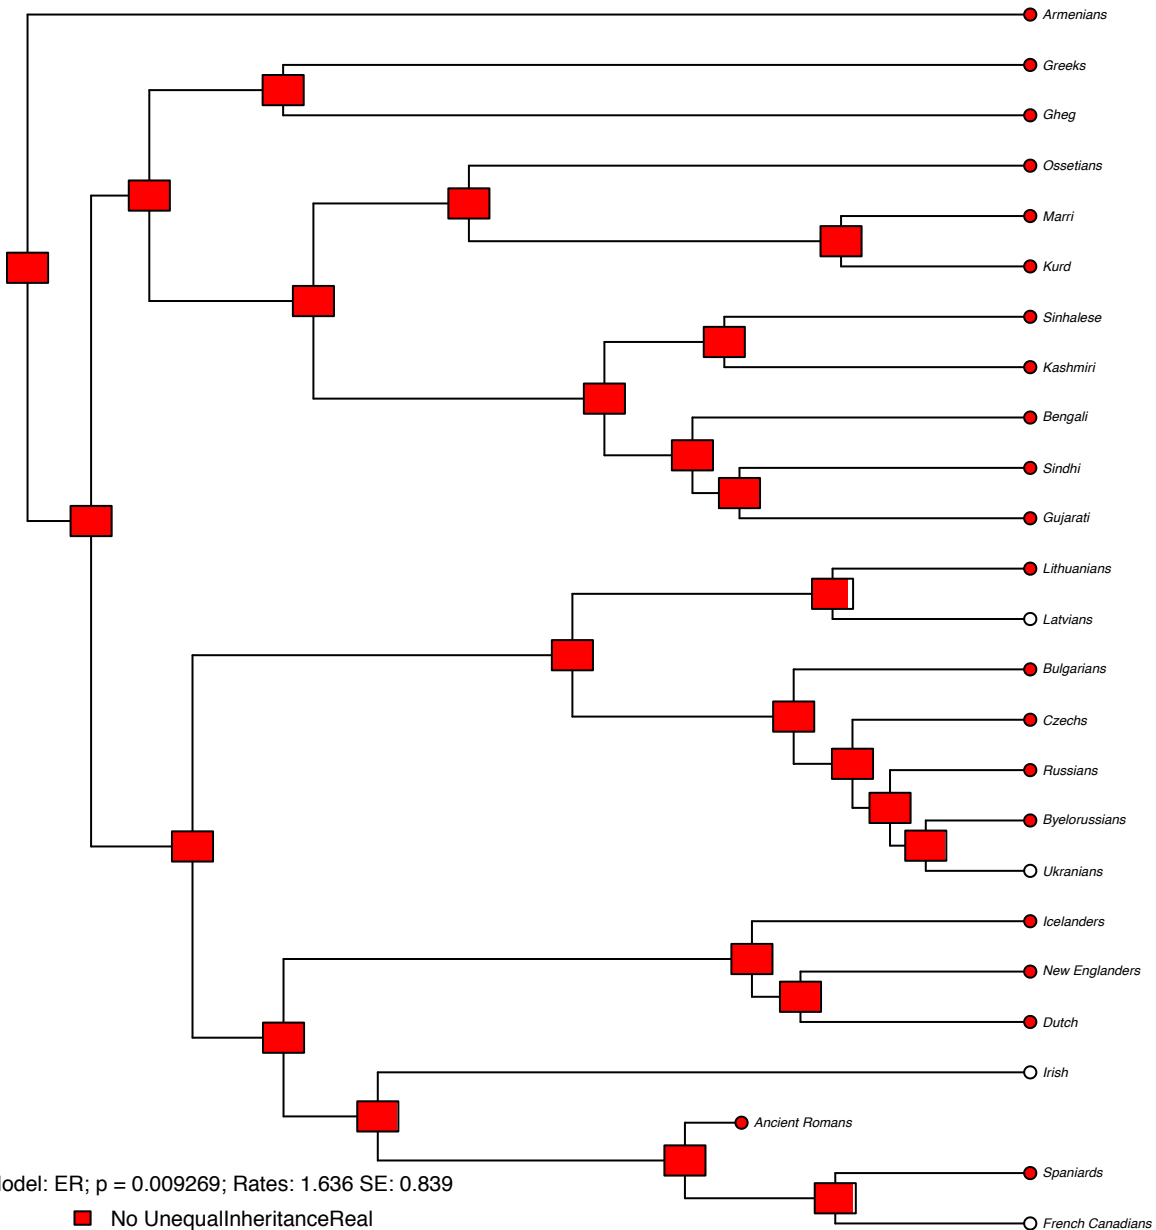

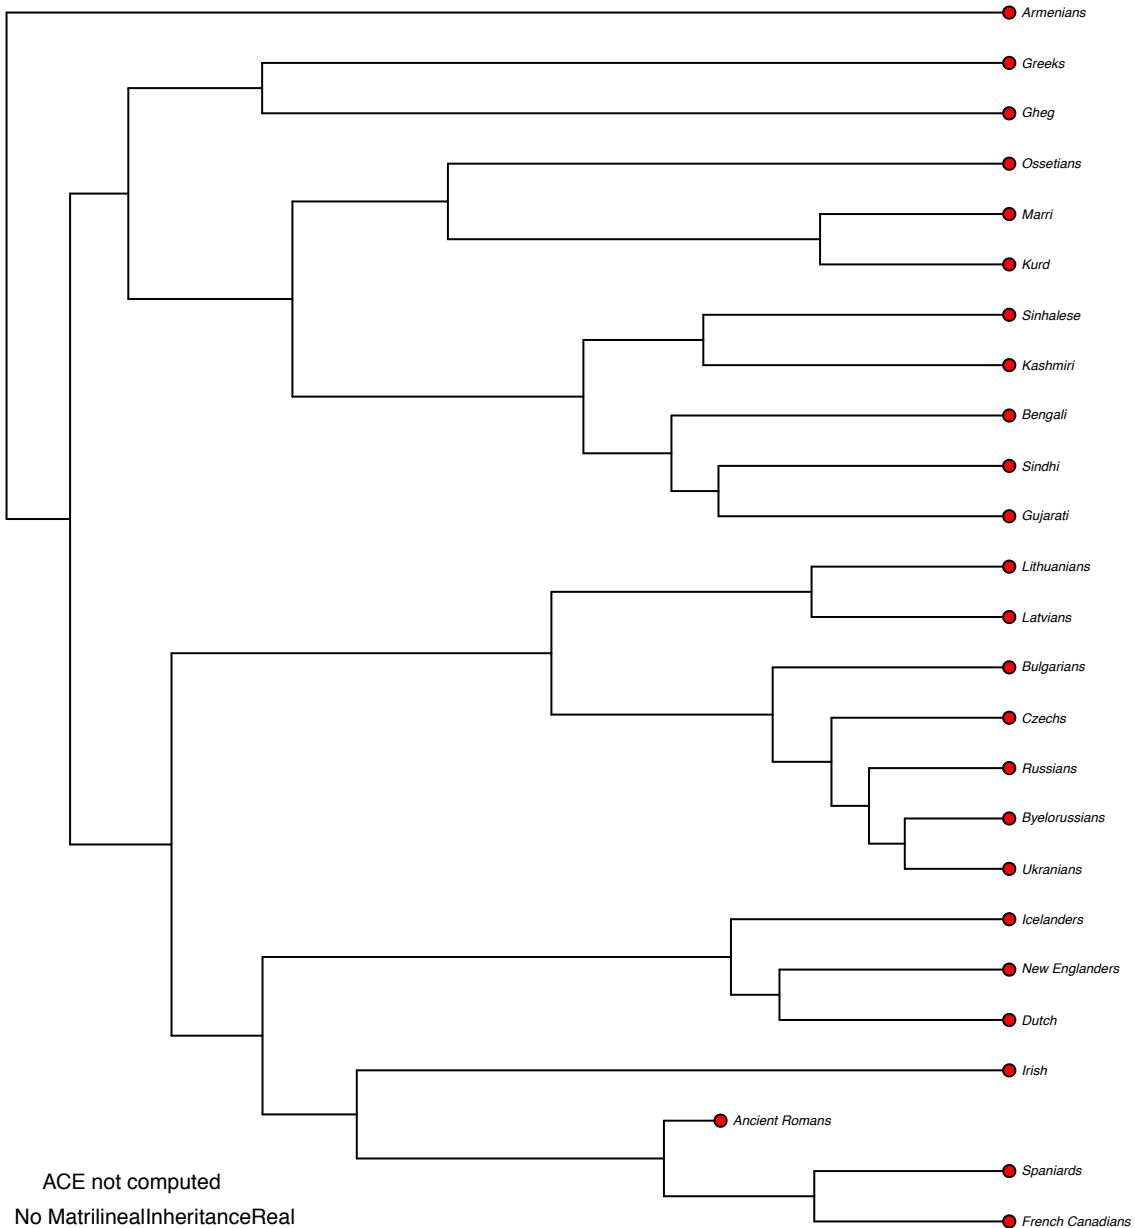

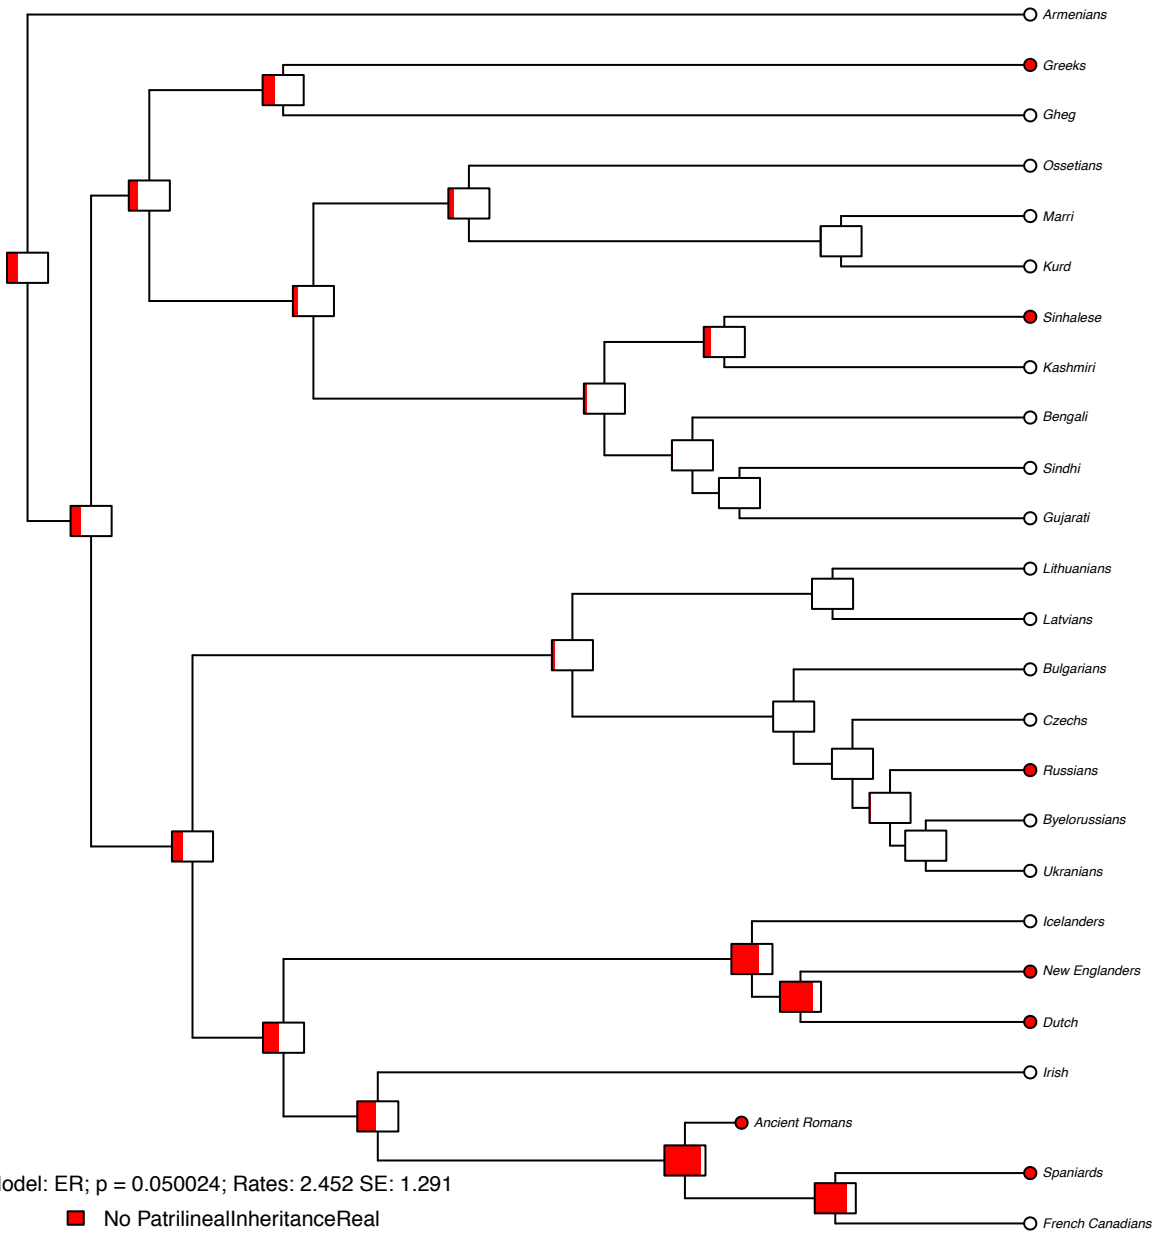

Model: ER;  $p = 0.050024$ ; Rates: 2.452 SE: 1.291

- No PatrilinealInheritanceReal
- PatrilinealInheritanceReal

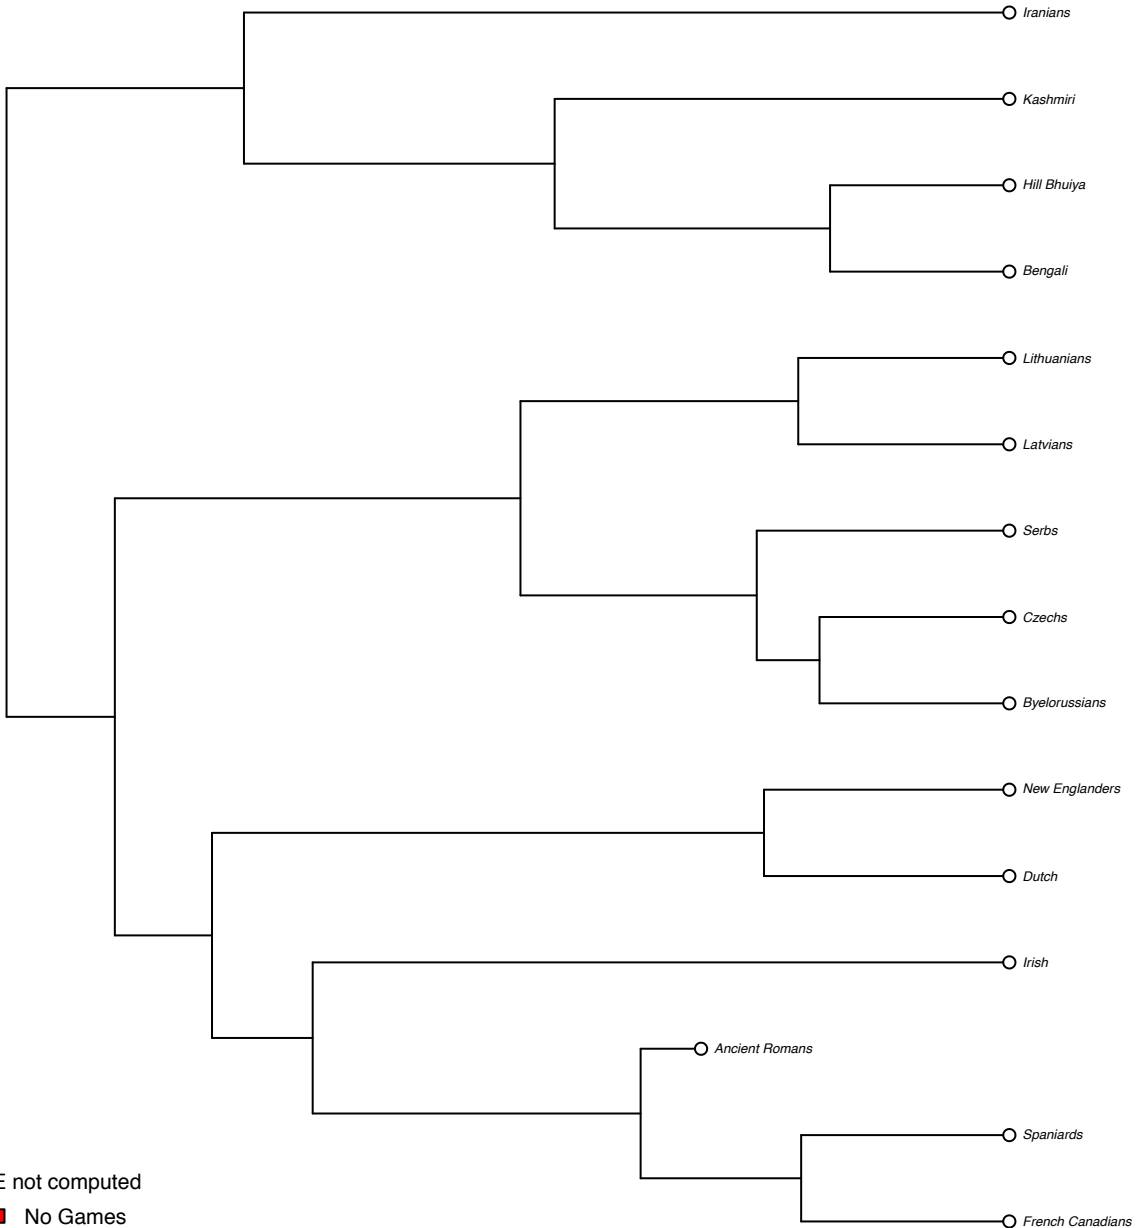



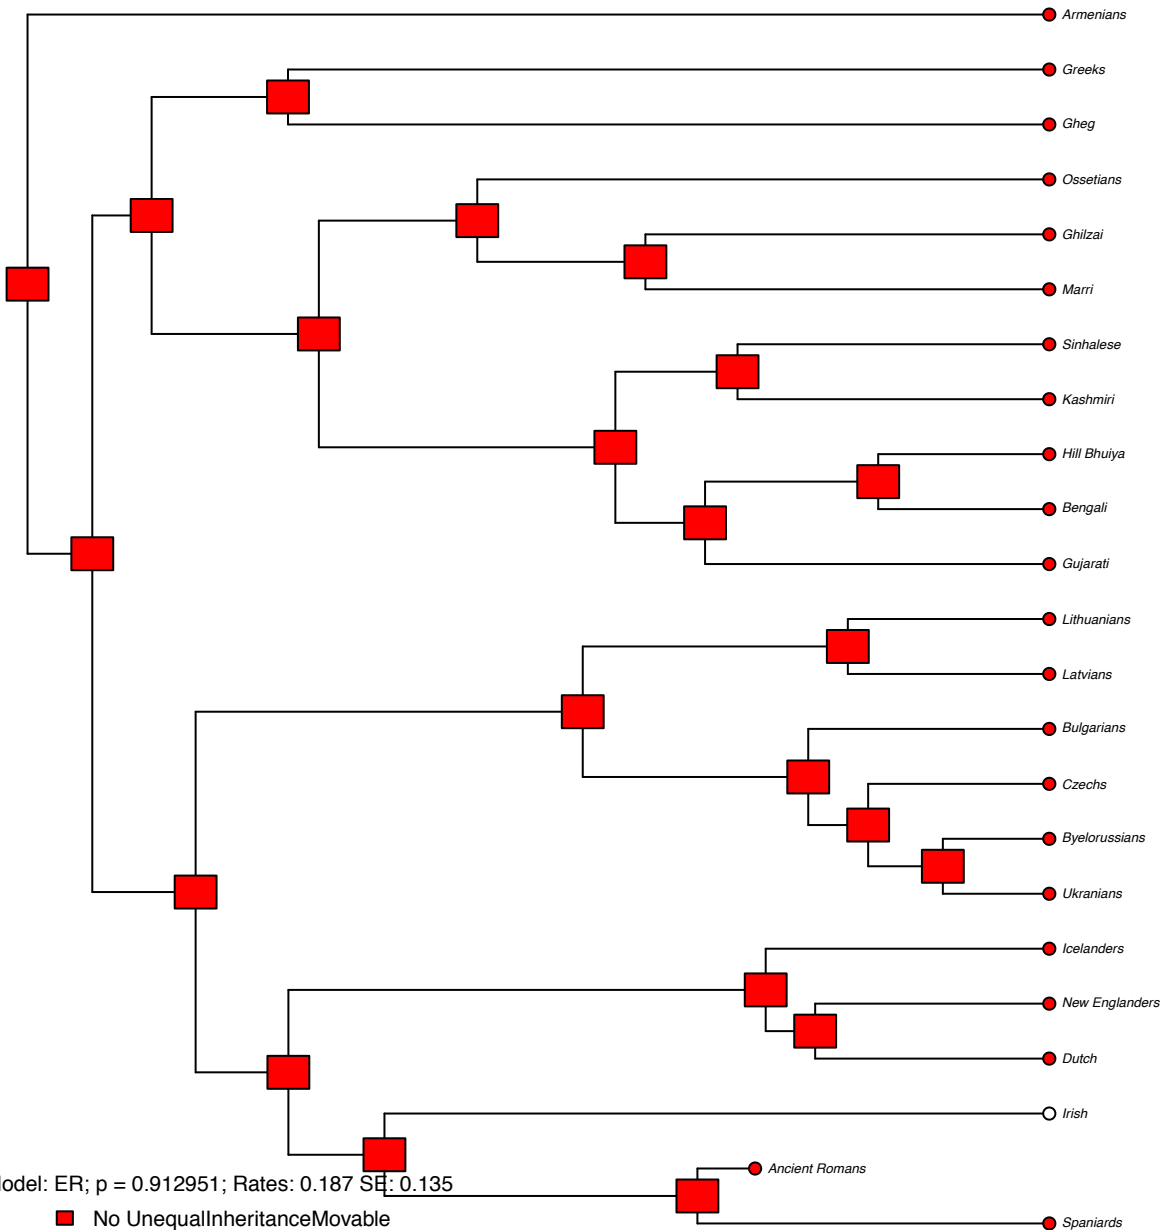

- Armenians
- Greeks
- Ghag
- Ossetians
- Ghilzai
- Marri
- Sinhalese
- Kashmiri
- Hill Bhuiya
- Bengali
- Gujarati
- Lithuanians
- Latvians
- Bulgarians
- Czechs
- Byelorussians
- Ukranians
- Icelanders
- New Englanders
- Dutch
- Irish
- Ancient Romans
- Spaniards

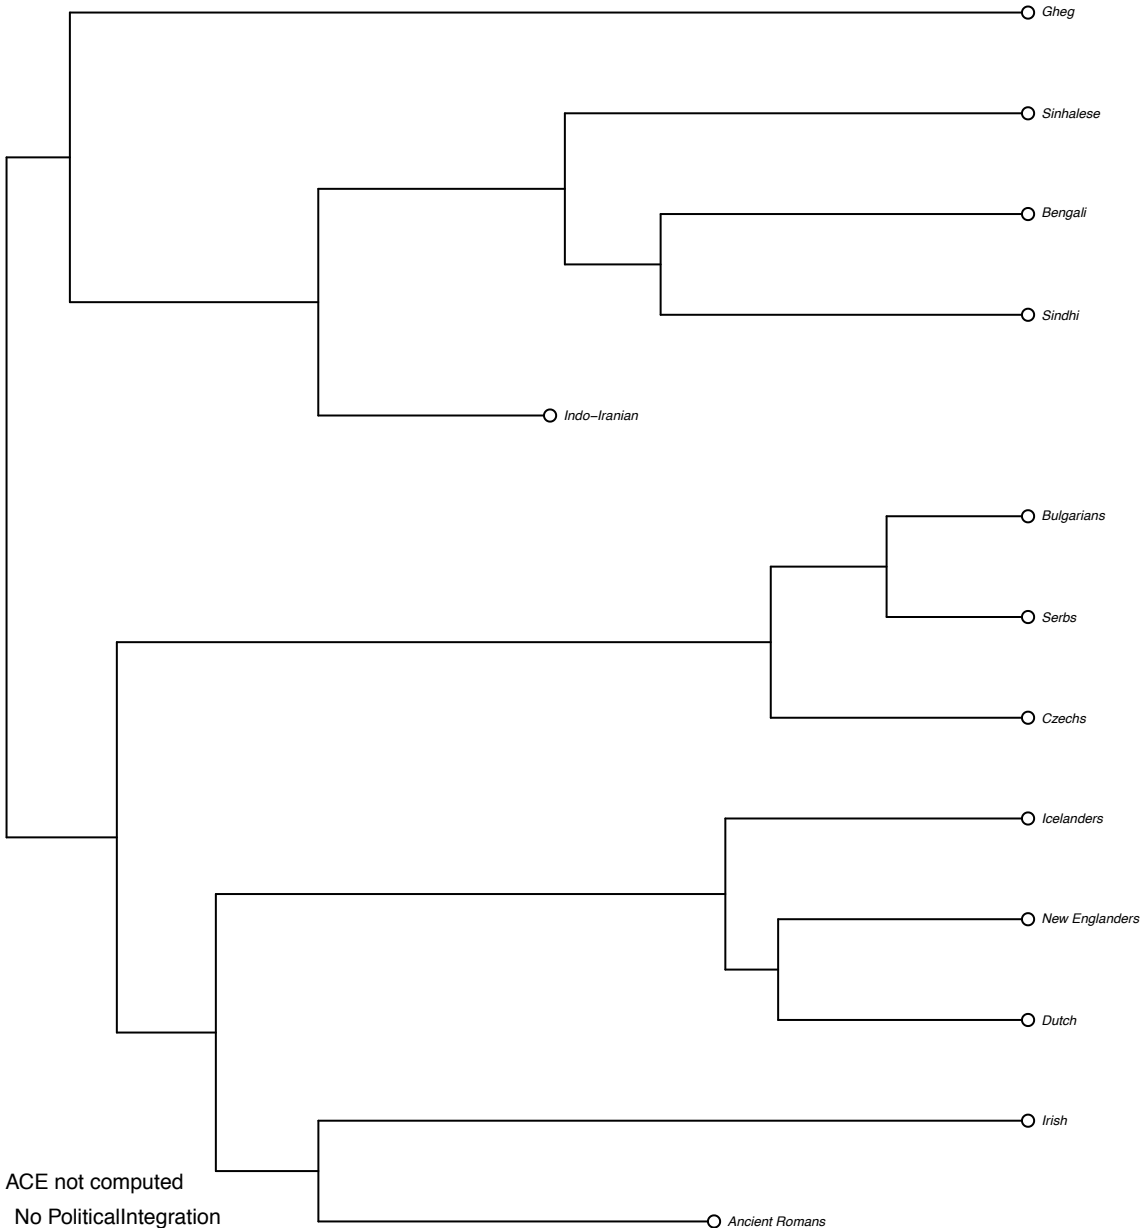

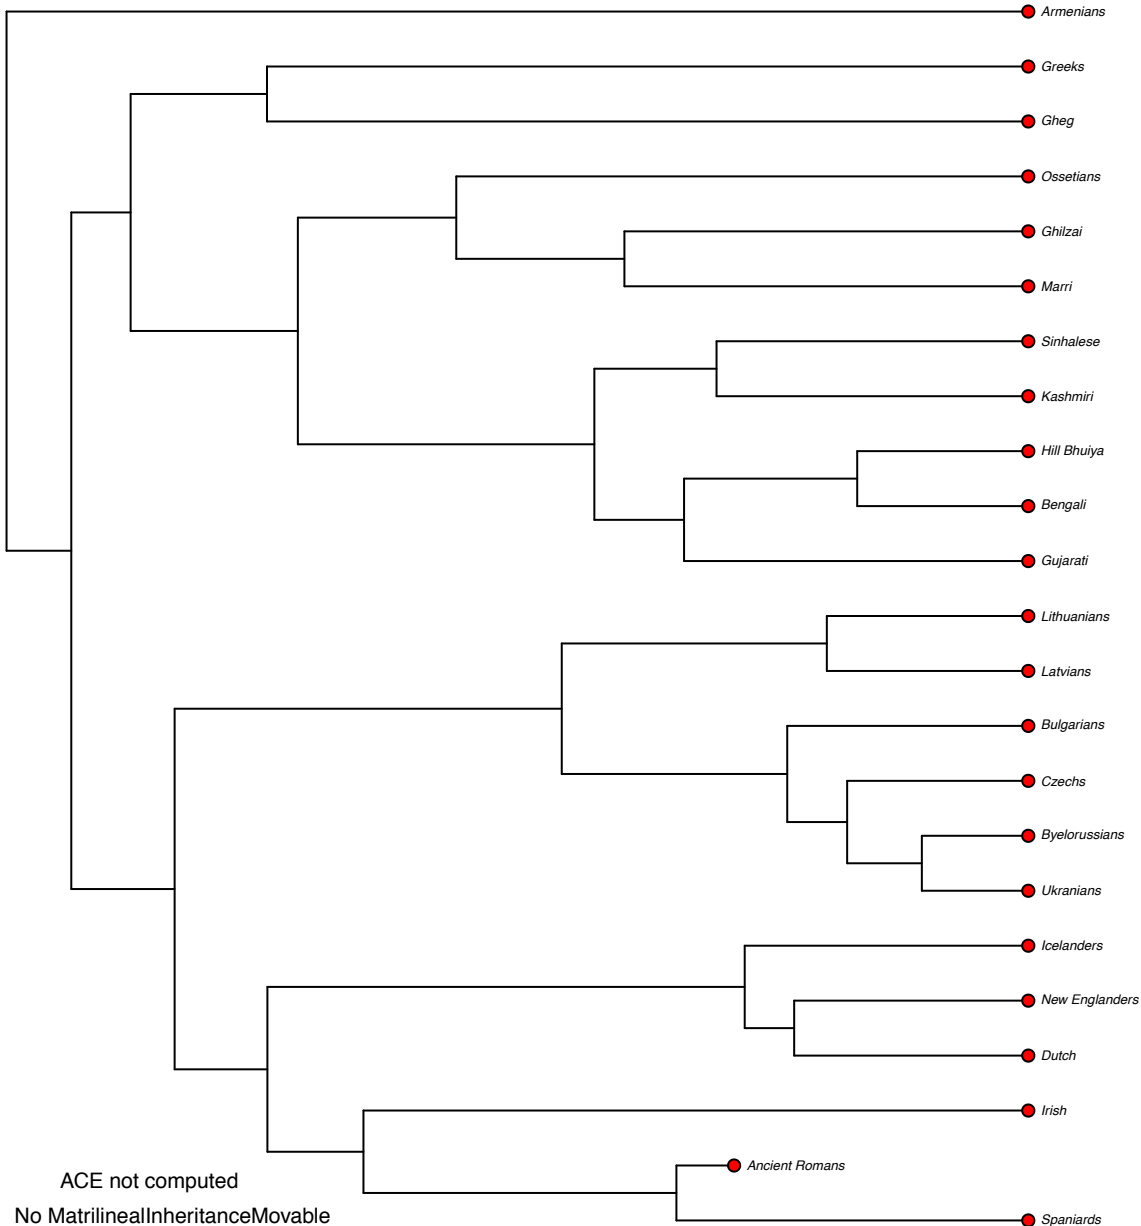

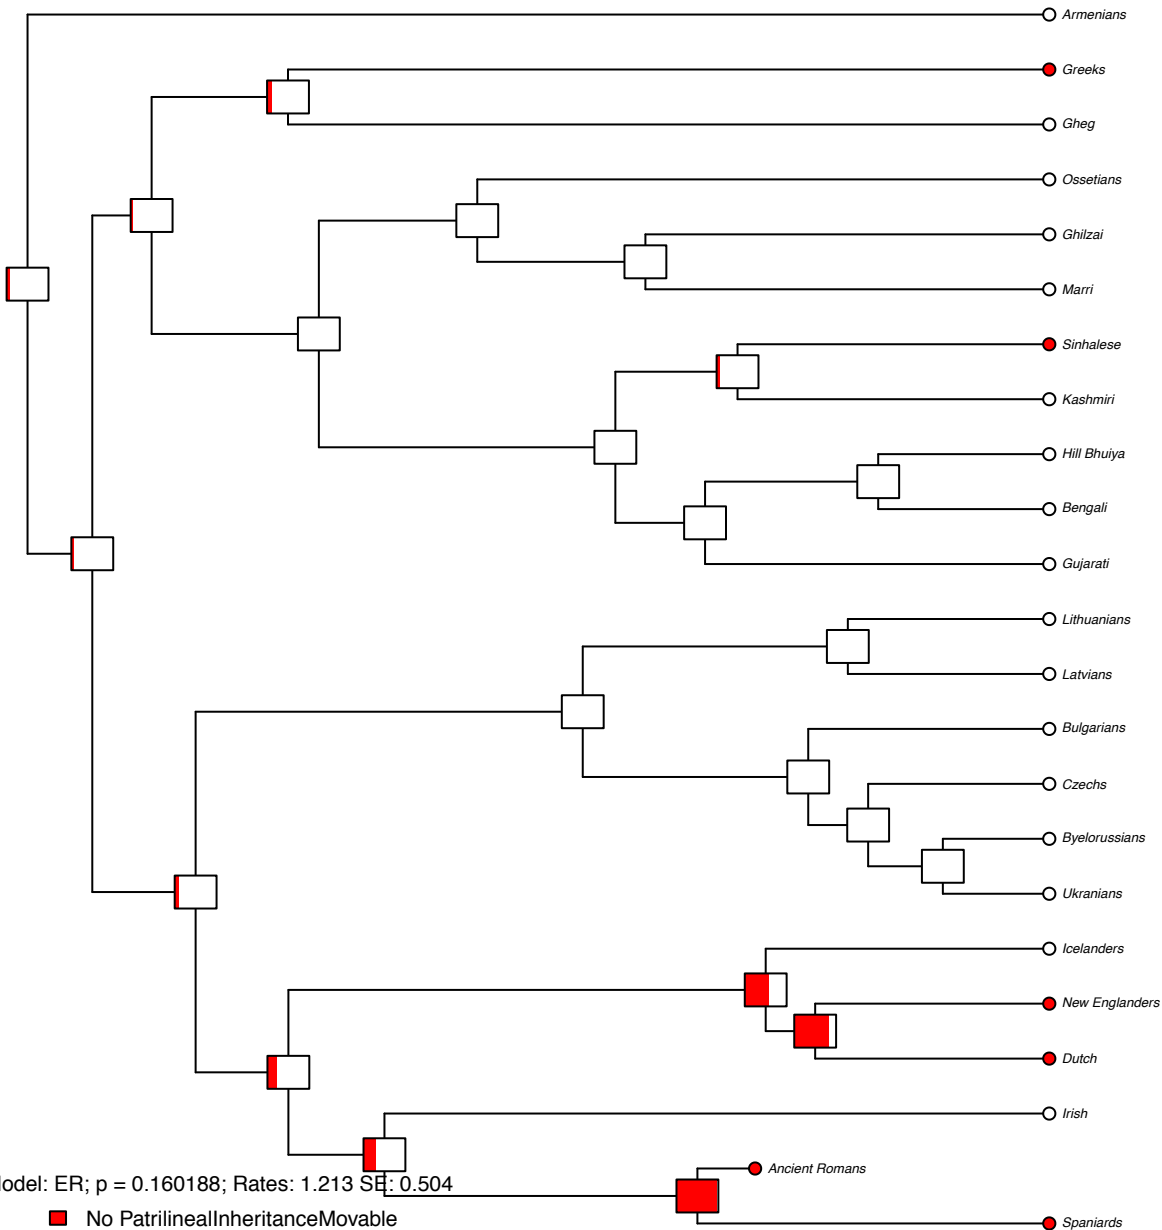

Armenians  
 Greeks  
 Ghag  
 Ossetians  
 Ghilzai  
 Marri  
 Sinhalese  
 Kashmiri  
 Hill Bhuiya  
 Bengali  
 Gujarati  
 Lithuanians  
 Latvians  
 Bulgarians  
 Czechs  
 Byelorussians  
 Ukranians  
 Icelanders  
 New Englanders  
 Dutch  
 Irish  
 Ancient Romans  
 Spaniards

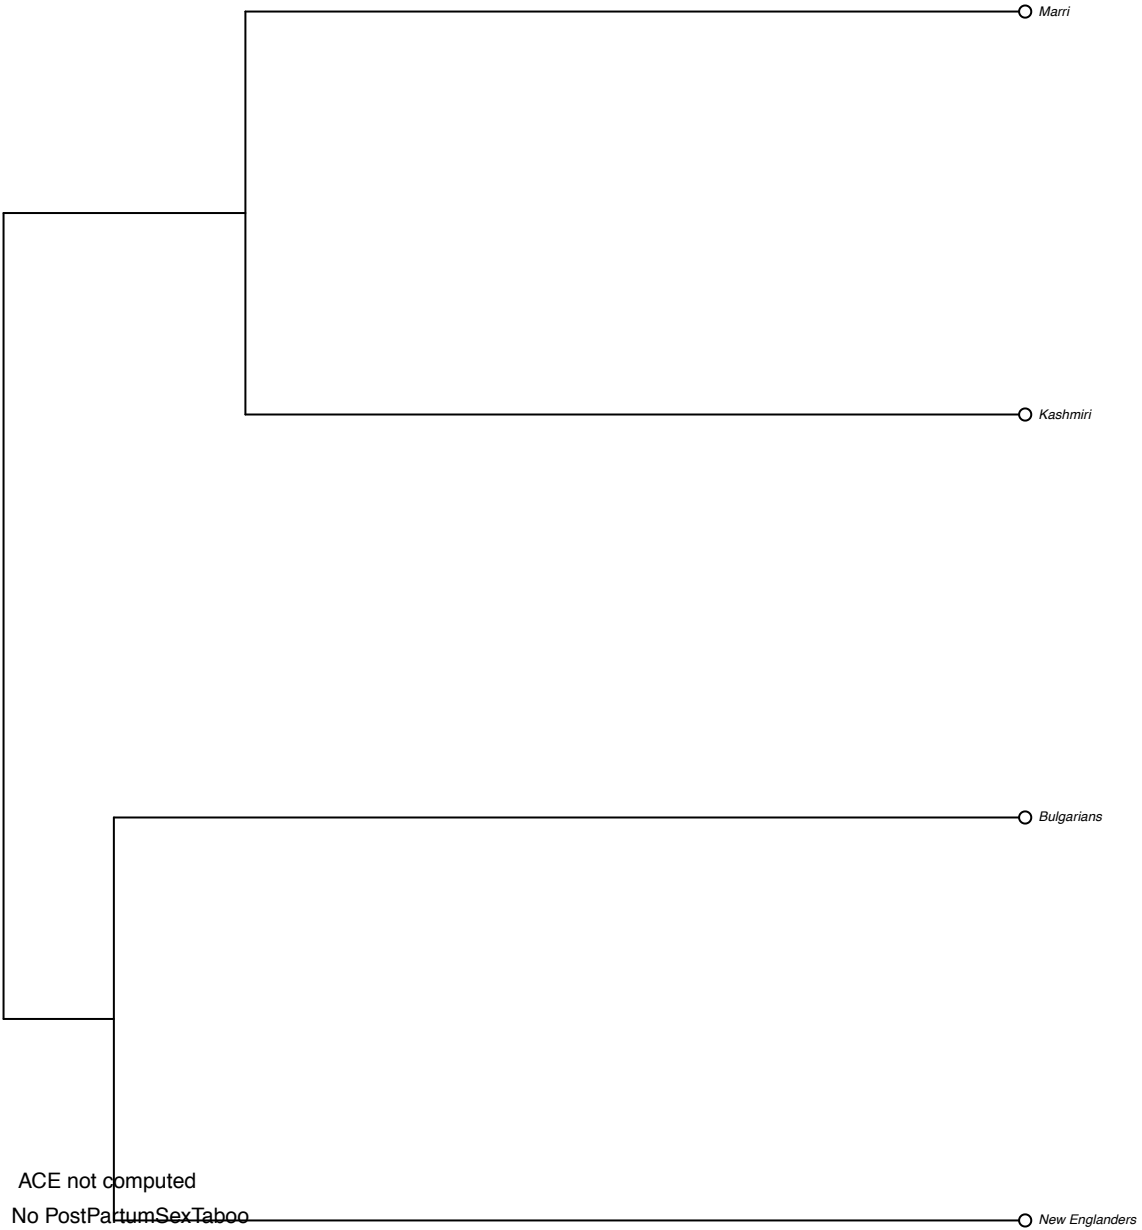

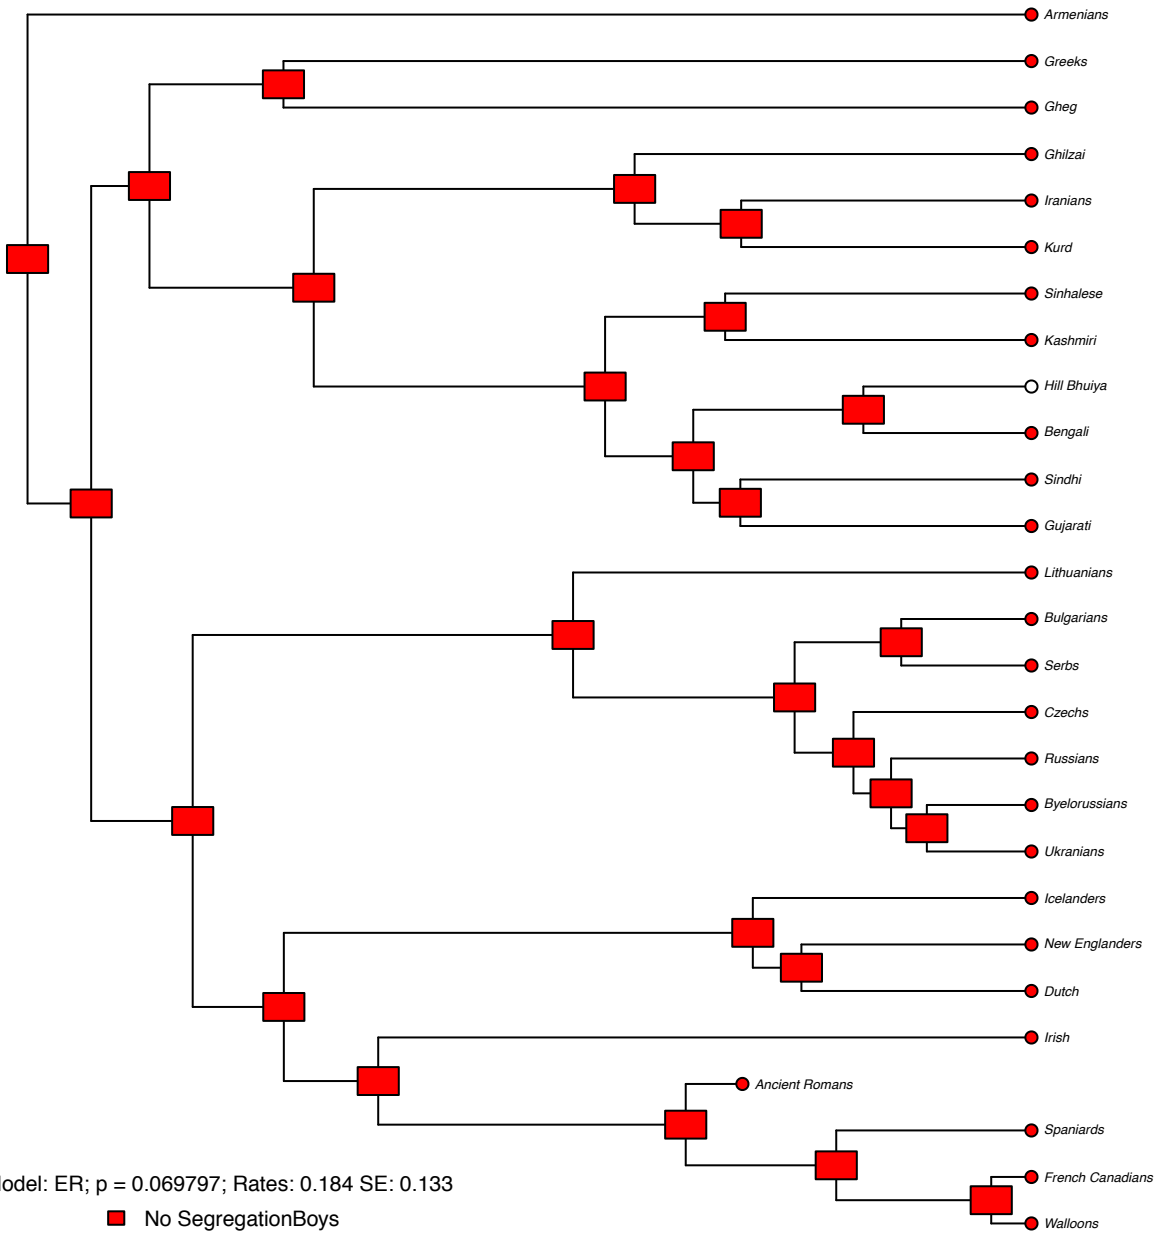

Model: ER;  $p = 0.069797$ ; Rates: 0.184 SE: 0.133

- No SegregationBoys
- SegregationBoys

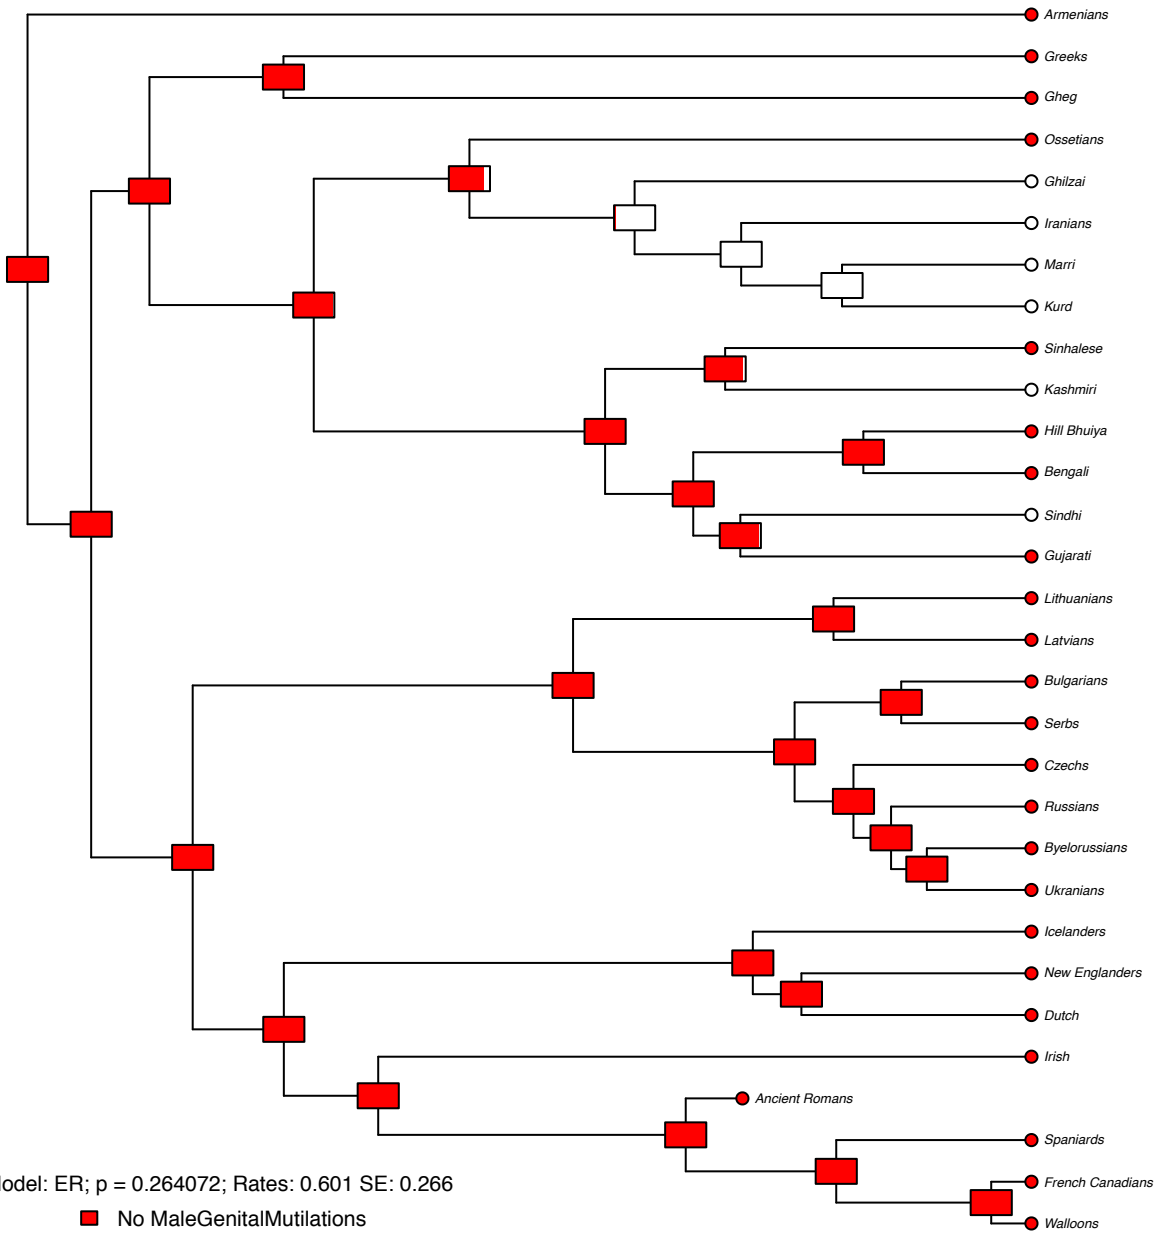

- Armenians
- Greeks
- Ghag
- Ossetians
- Ghilzai
- Iranians
- Marri
- Kurd
- Sinhalese
- Kashmiri
- Hill Bhuiya
- Bengali
- Sindhi
- Gujarati
- Lithuanians
- Latvians
- Bulgarians
- Serbs
- Czechs
- Russians
- Byelorussians
- Ukrainians
- Icelanders
- New Englanders
- Dutch
- Irish
- Ancient Romans
- Spaniards
- French Canadians
- Walloons

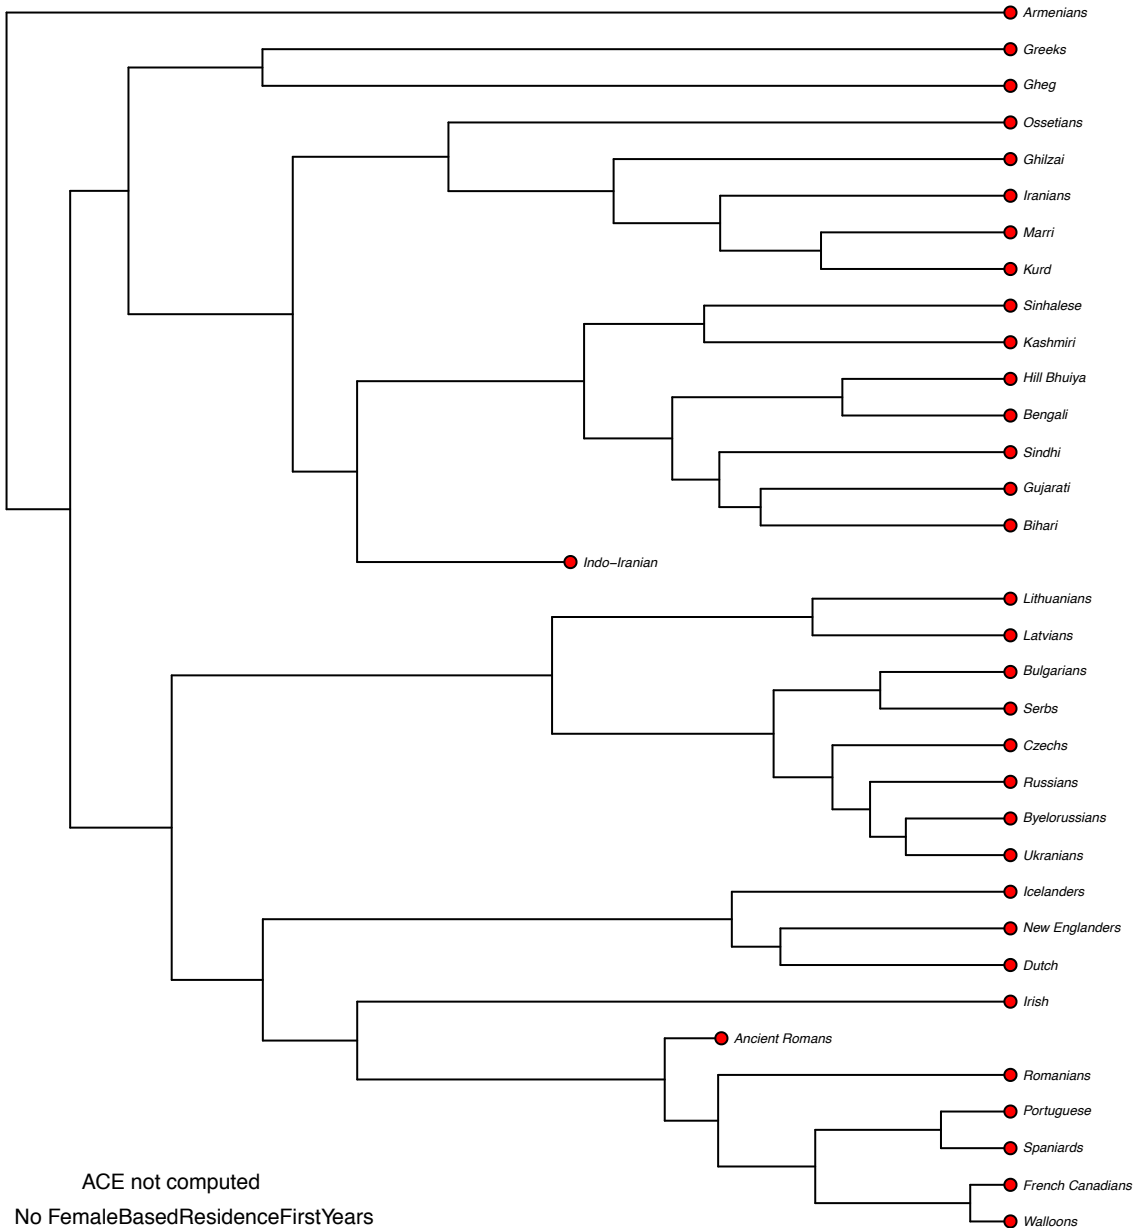



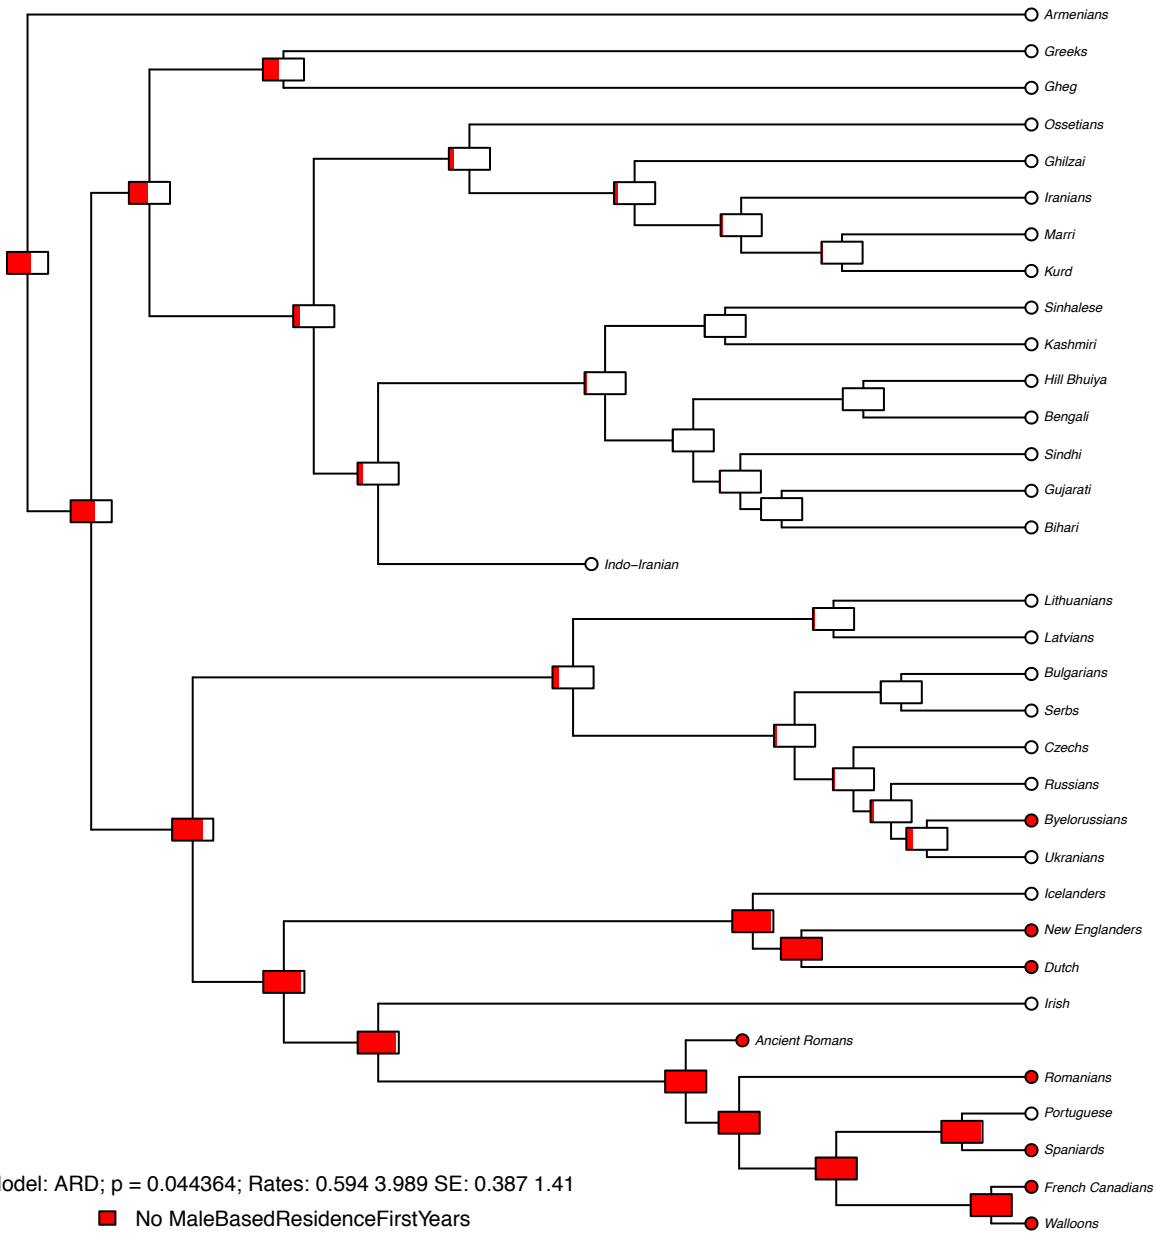

- Armenians
- Greeks
- Gheg
- Ossetians
- Ghilzai
- Iranian
- Marri
- Kurd
- Sinhalese
- Kashmiri
- Hill Bhuiya
- Bengali
- Sindhi
- Gujarati
- Bihari
- Indo-Iranian
- Lithuanians
- Latvians
- Bulgarians
- Serbs
- Czechs
- Russians
- Byelorussians
- Ukrainians
- Icelanders
- New Englanders
- Dutch
- Irish
- Ancient Romans
- Romanians
- Portuguese
- Spaniards
- French Canadians
- Walloons

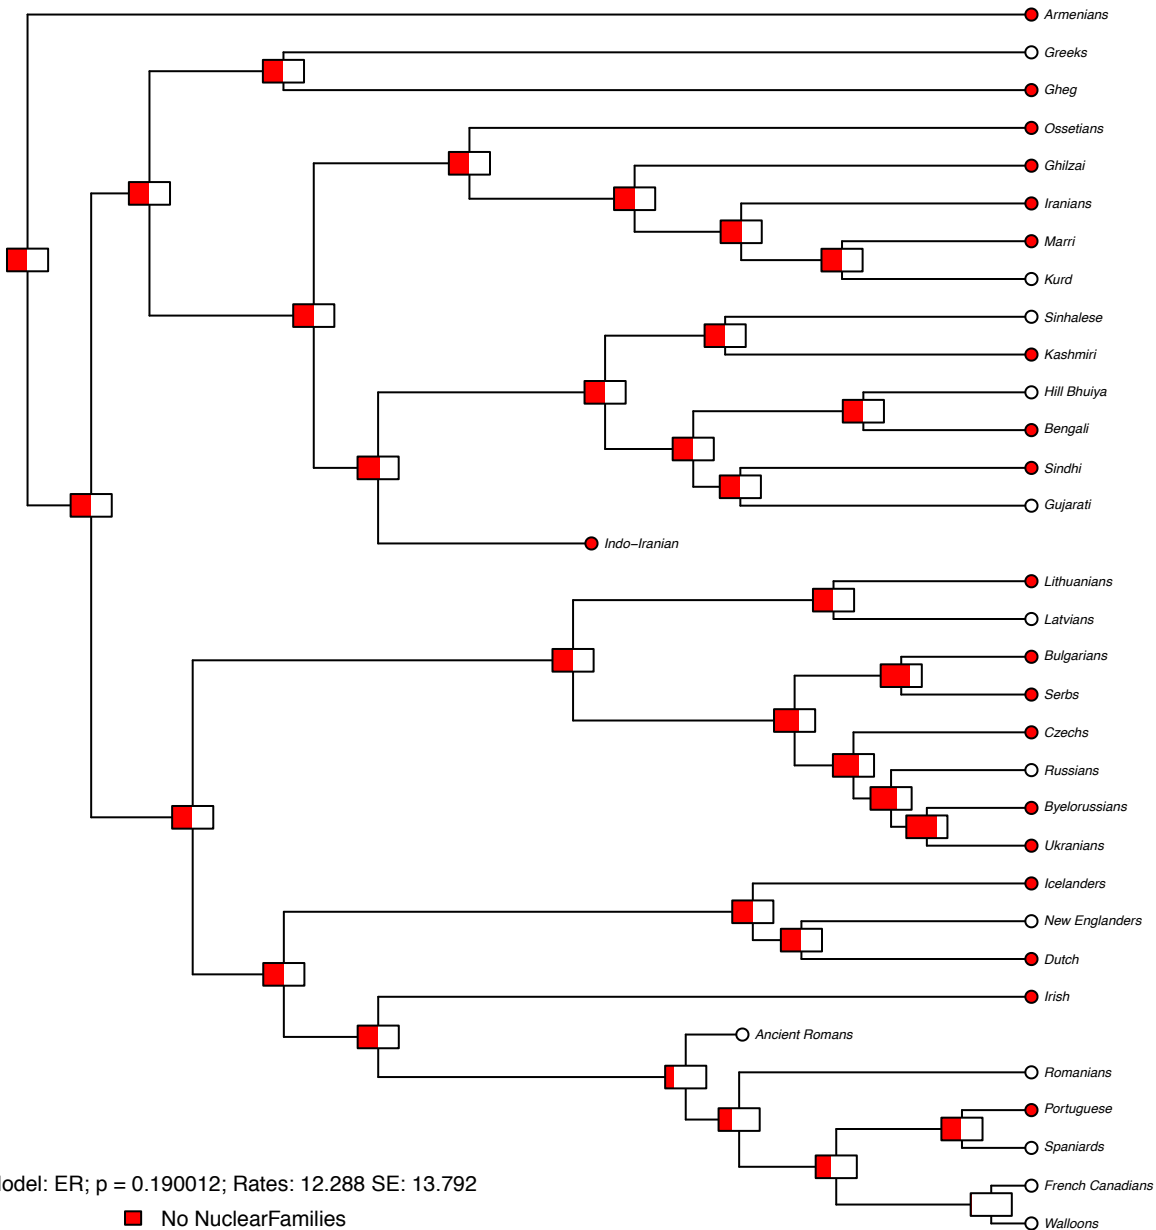

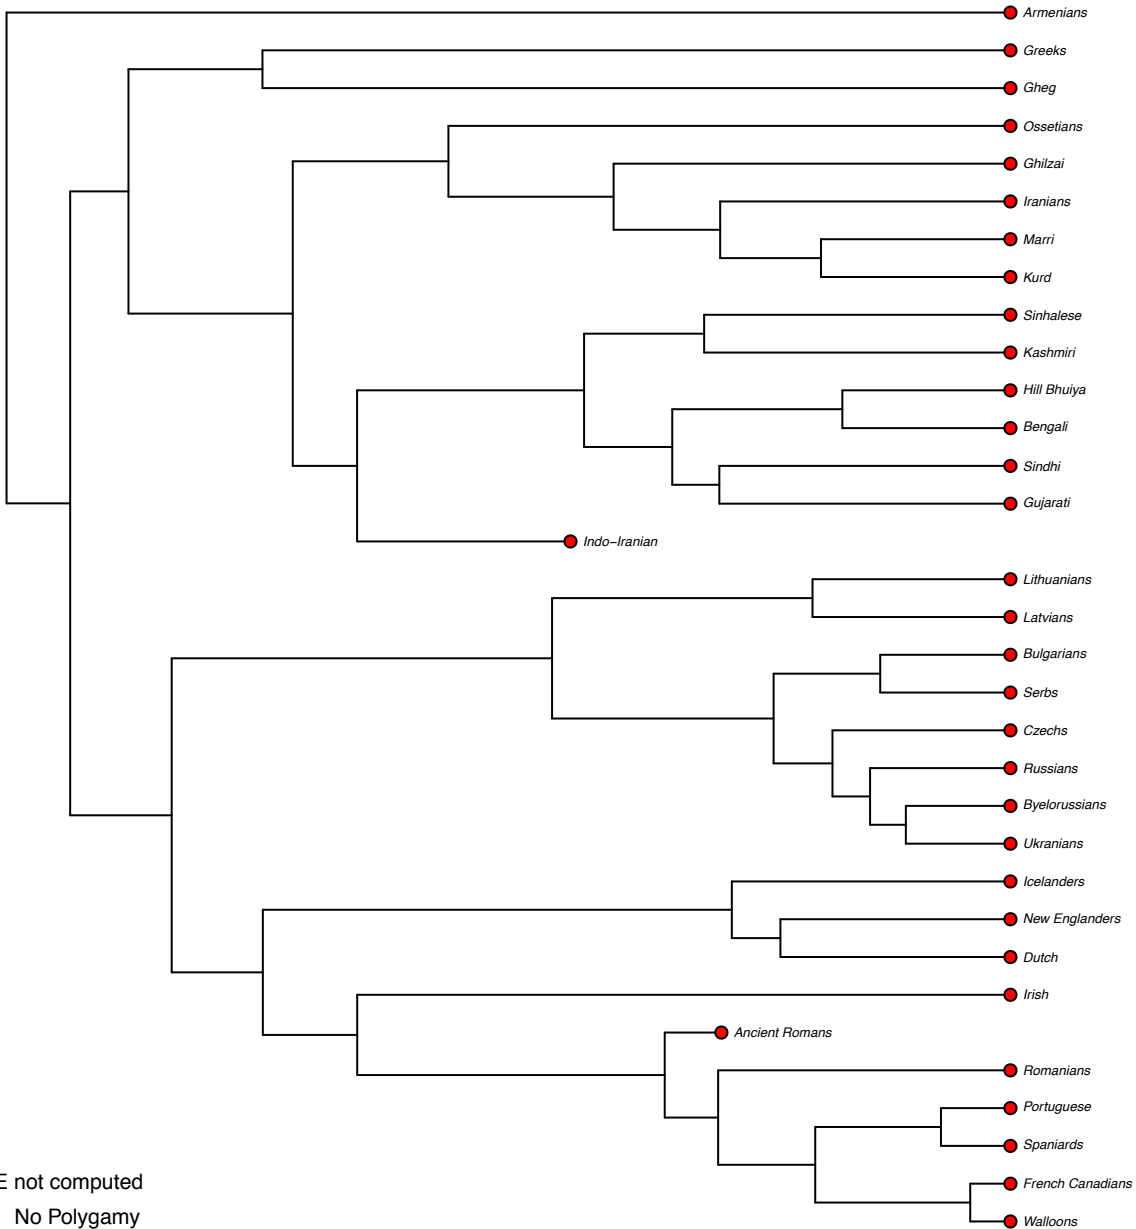

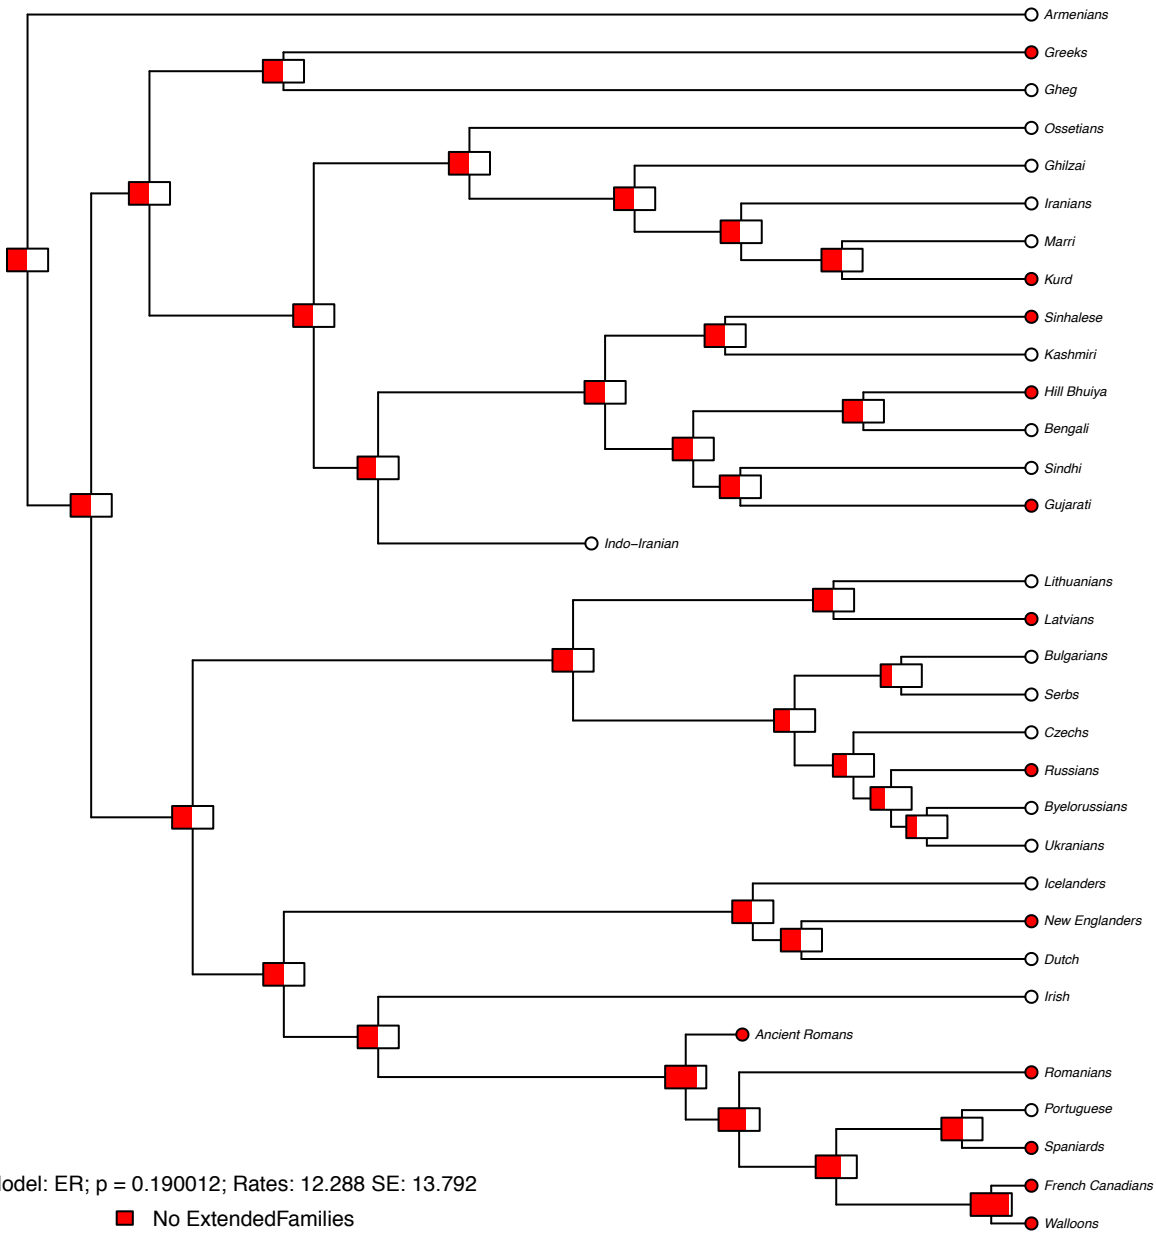

Model: ER;  $p = 0.190012$ ; Rates: 12.288 SE: 13.792

■ No ExtendedFamilies  
 ExtendedFamilies

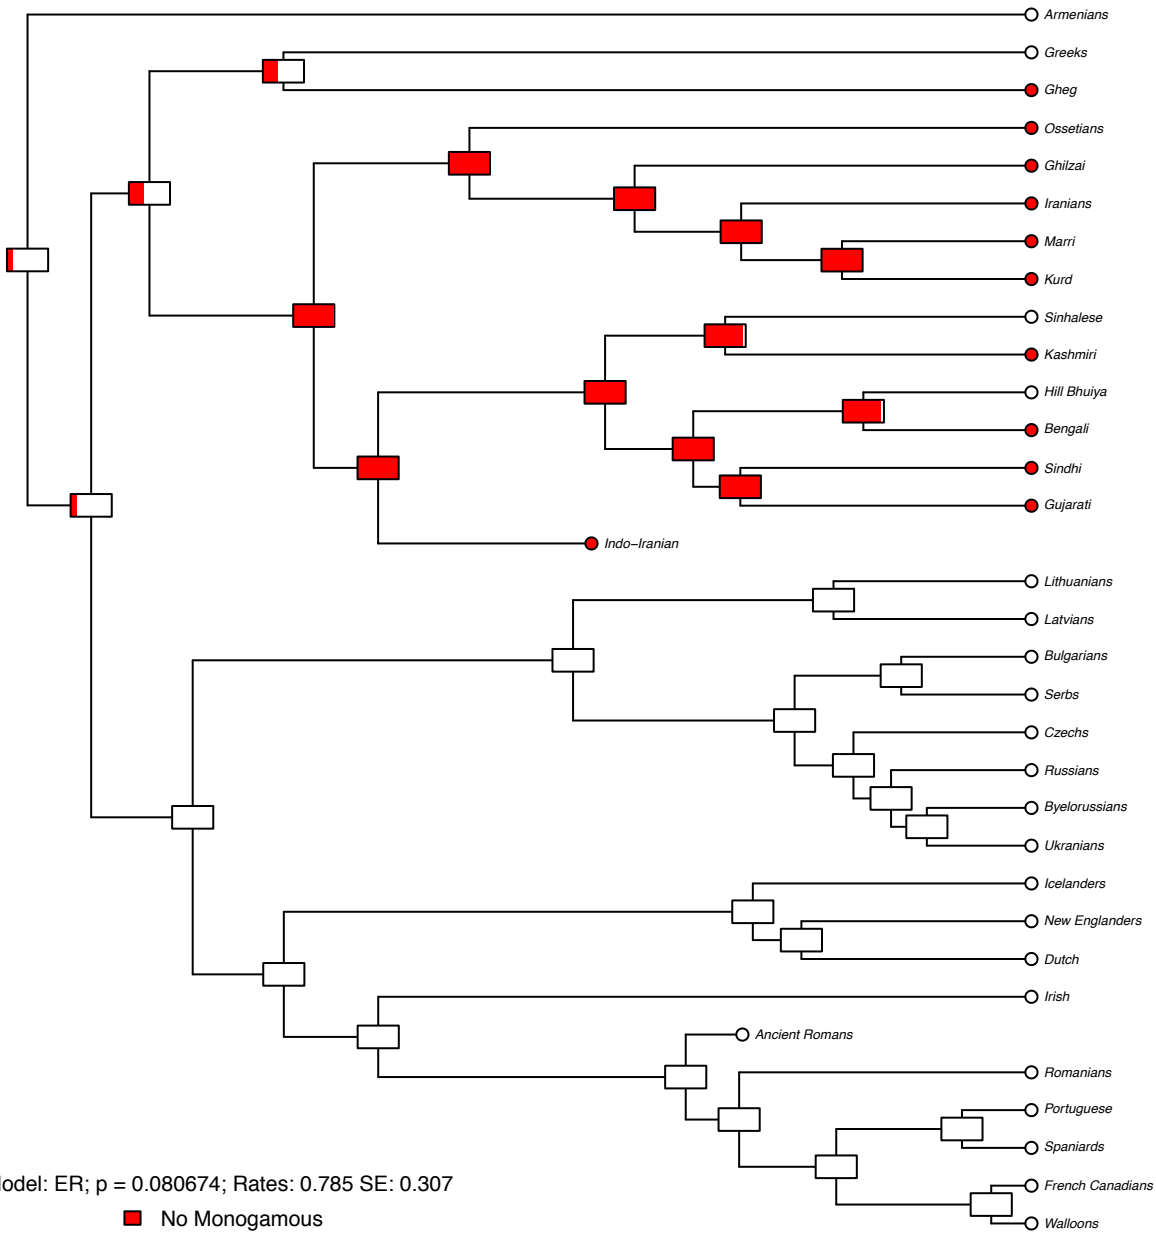

Model: ER;  $p = 0.080674$ ; Rates: 0.785 SE: 0.307

■ No Monogamous  
 Monogamous

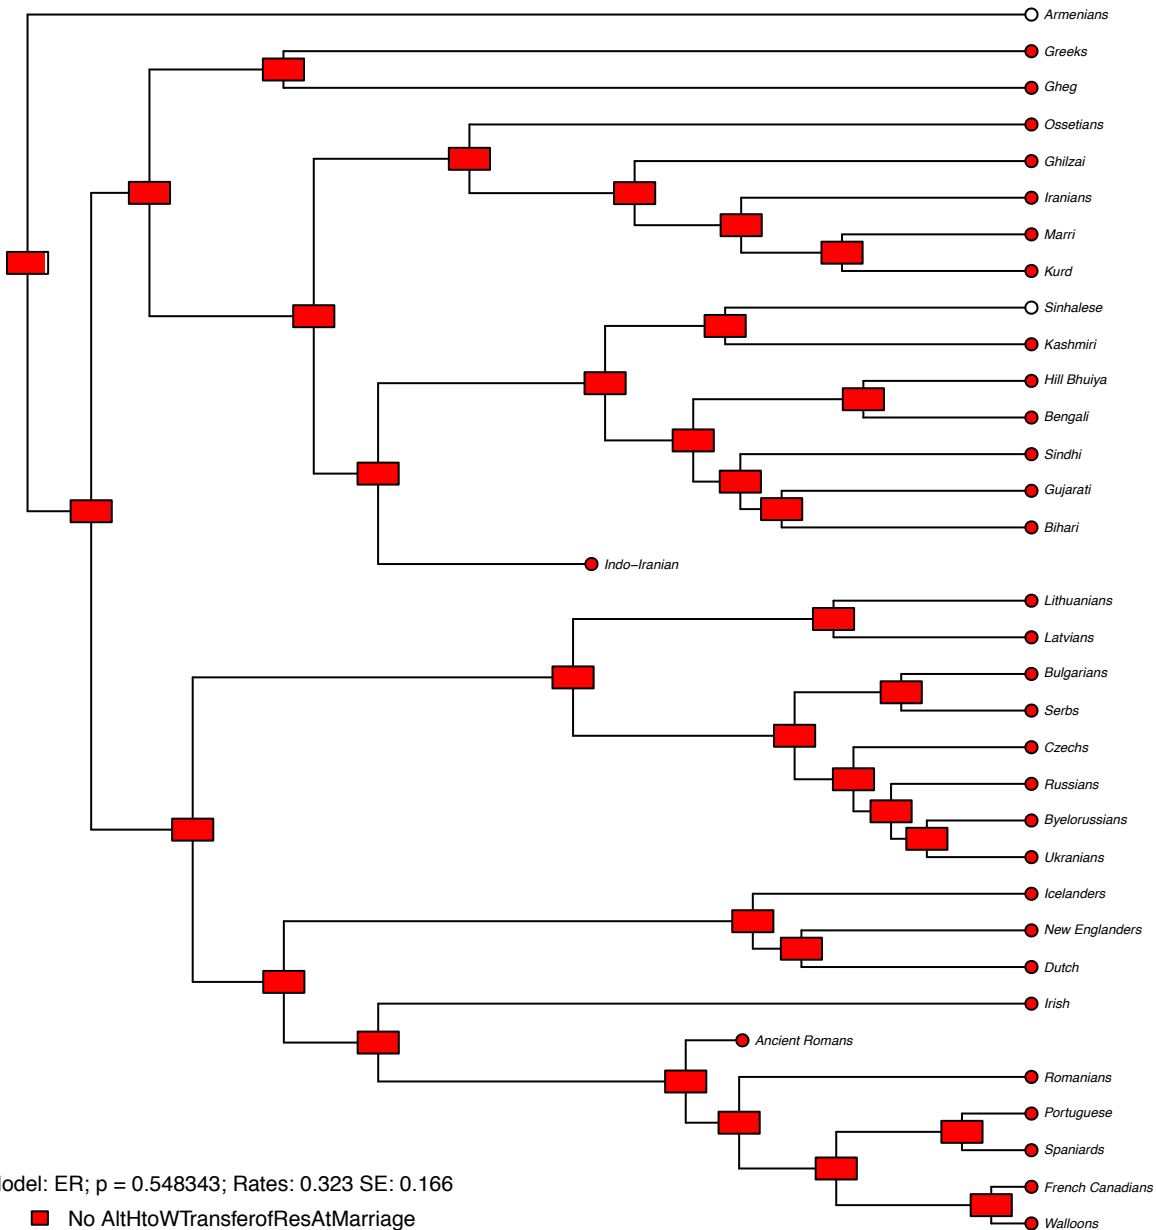

Model: ER;  $p = 0.548343$ ; Rates: 0.323 SE: 0.166

- No AltHtoWTransferofResAtMarriage
- AltHtoWTransferofResAtMarriage

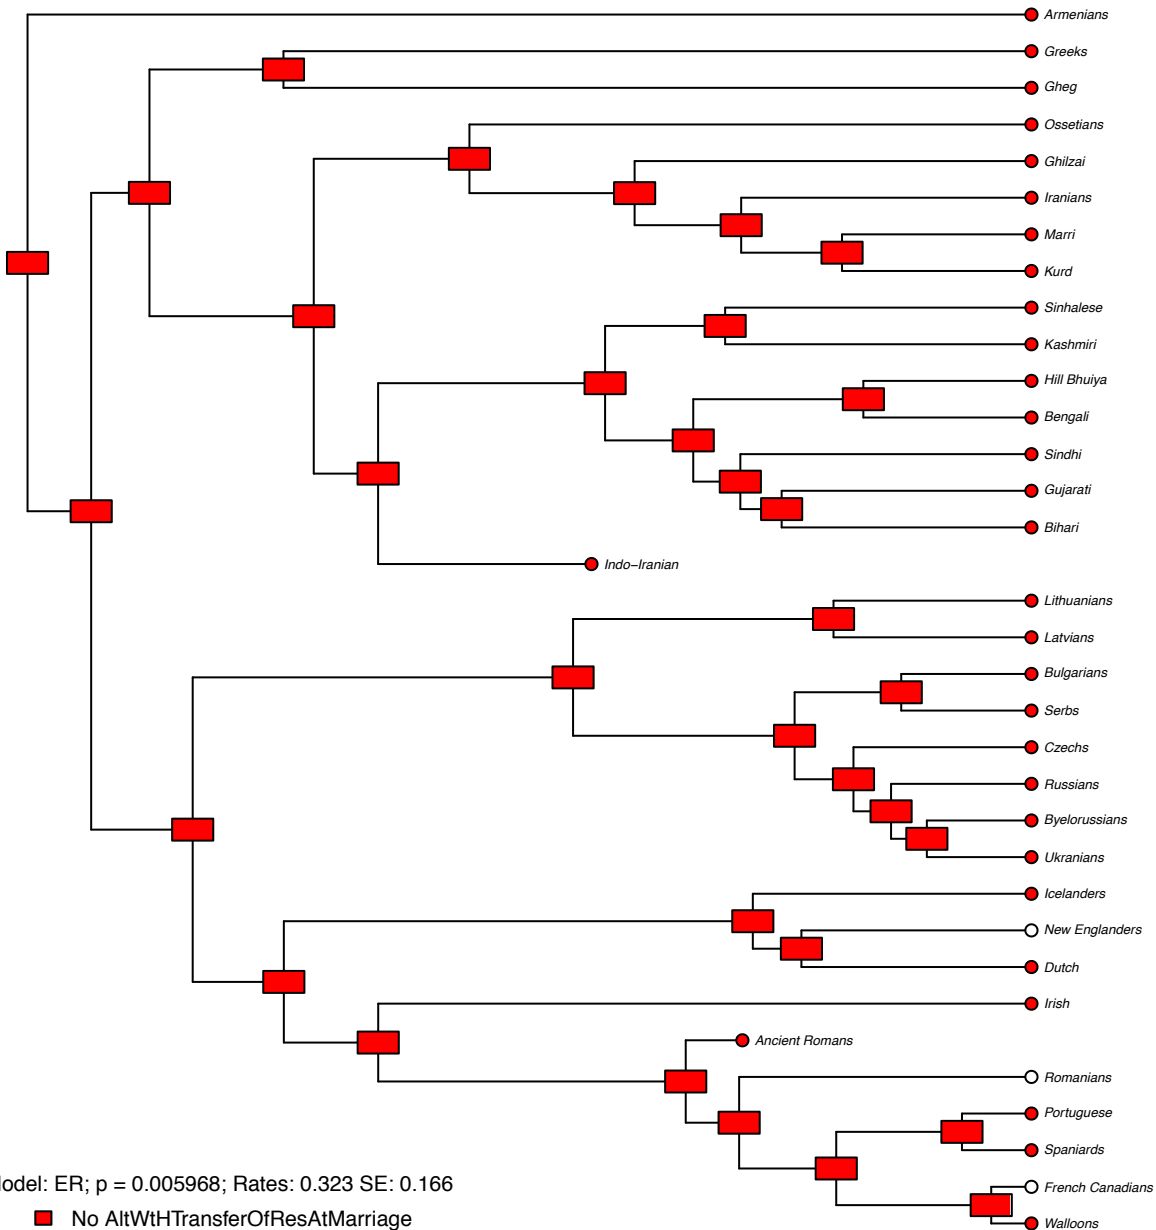

- Armenians
- Greeks
- Gheg
- Ossetians
- Ghilzai
- Iranians
- Marri
- Kurd
- Sinhalese
- Kashmiri
- Hill Bhuiya
- Bengali
- Sindhi
- Gujarati
- Bihari
- Indo-Iranian
- Lithuanians
- Latvians
- Bulgarians
- Serbs
- Czechs
- Russians
- Byelorussians
- Ukrainians
- Icelanders
- New Englanders
- Dutch
- Irish
- Ancient Romans
- Romanians
- Portuguese
- Spaniards
- French Canadians
- Walloons

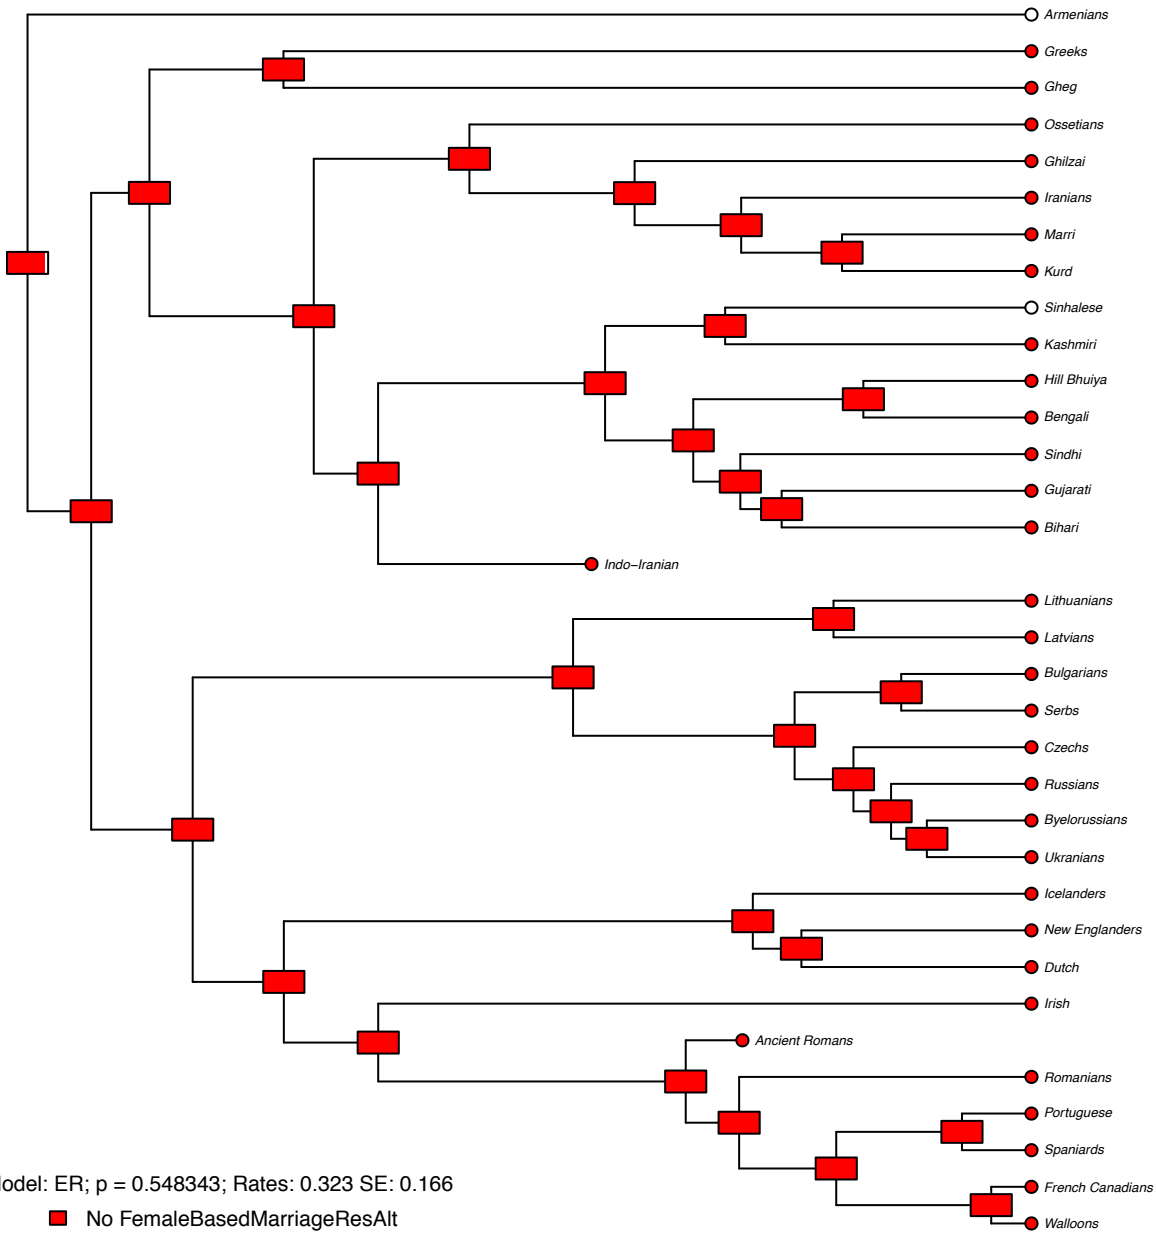

Model: ER;  $p = 0.548343$ ; Rates: 0.323 SE: 0.166

- No FemaleBasedMarriageResAlt
- FemaleBasedMarriageResAlt



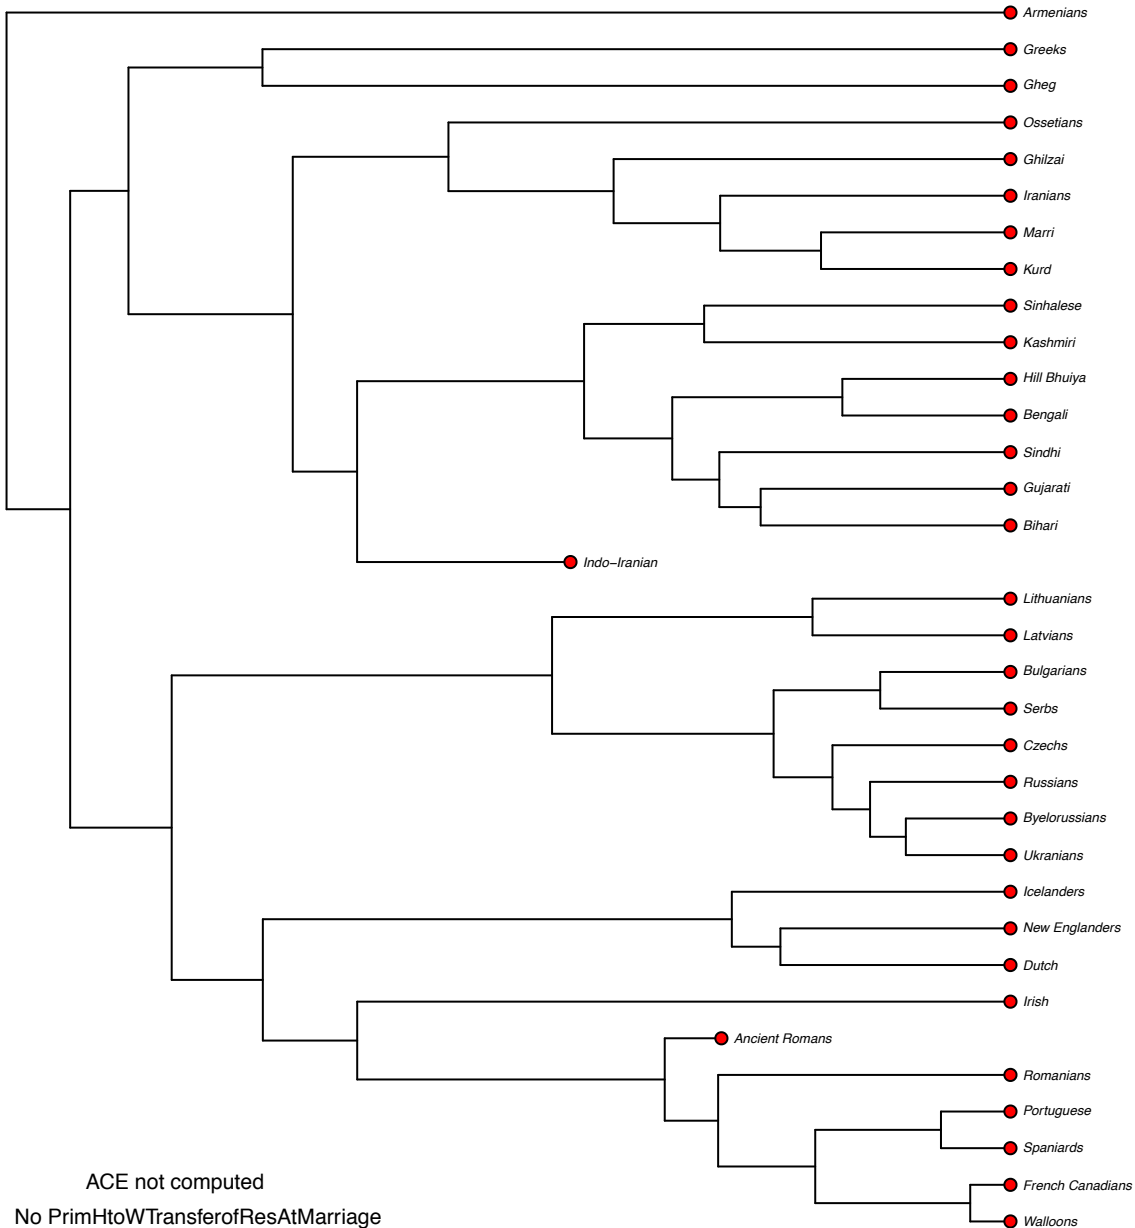

Armenians  
 Greeks  
 Gheg  
 Ossetians  
 Ghilzai  
 Iranians  
 Marri  
 Kurd  
 Sinhalese  
 Kashmiri  
 Hill Bhuiya  
 Bengali  
 Sindhi  
 Gujarati  
 Bihari  
 Indo-Iranian  
 Lithuanians  
 Latvians  
 Bulgarians  
 Serbs  
 Czechs  
 Russians  
 Byelorussians  
 Ukrainians  
 Icelanders  
 New Englanders  
 Dutch  
 Irish  
 Ancient Romans  
 Romanians  
 Portuguese  
 Spaniards  
 French Canadians  
 Wallons

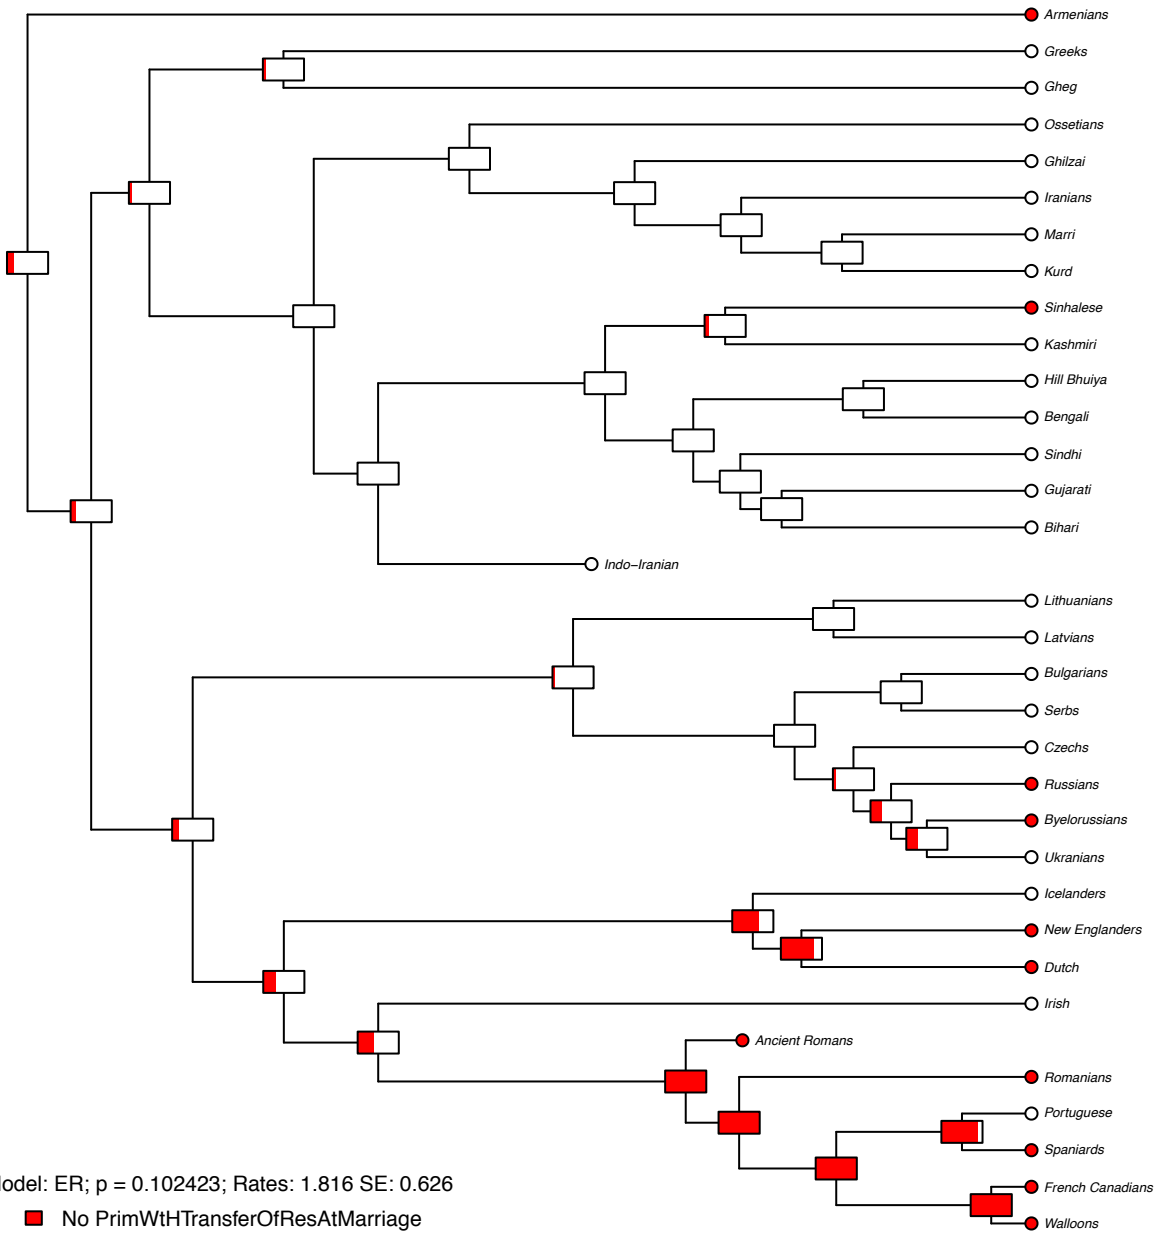

Model: ER;  $p = 0.102423$ ; Rates: 1.816 SE: 0.626

- No PrimWtHTransferOfResAtMarriage
- PrimWtHTransferOfResAtMarriage

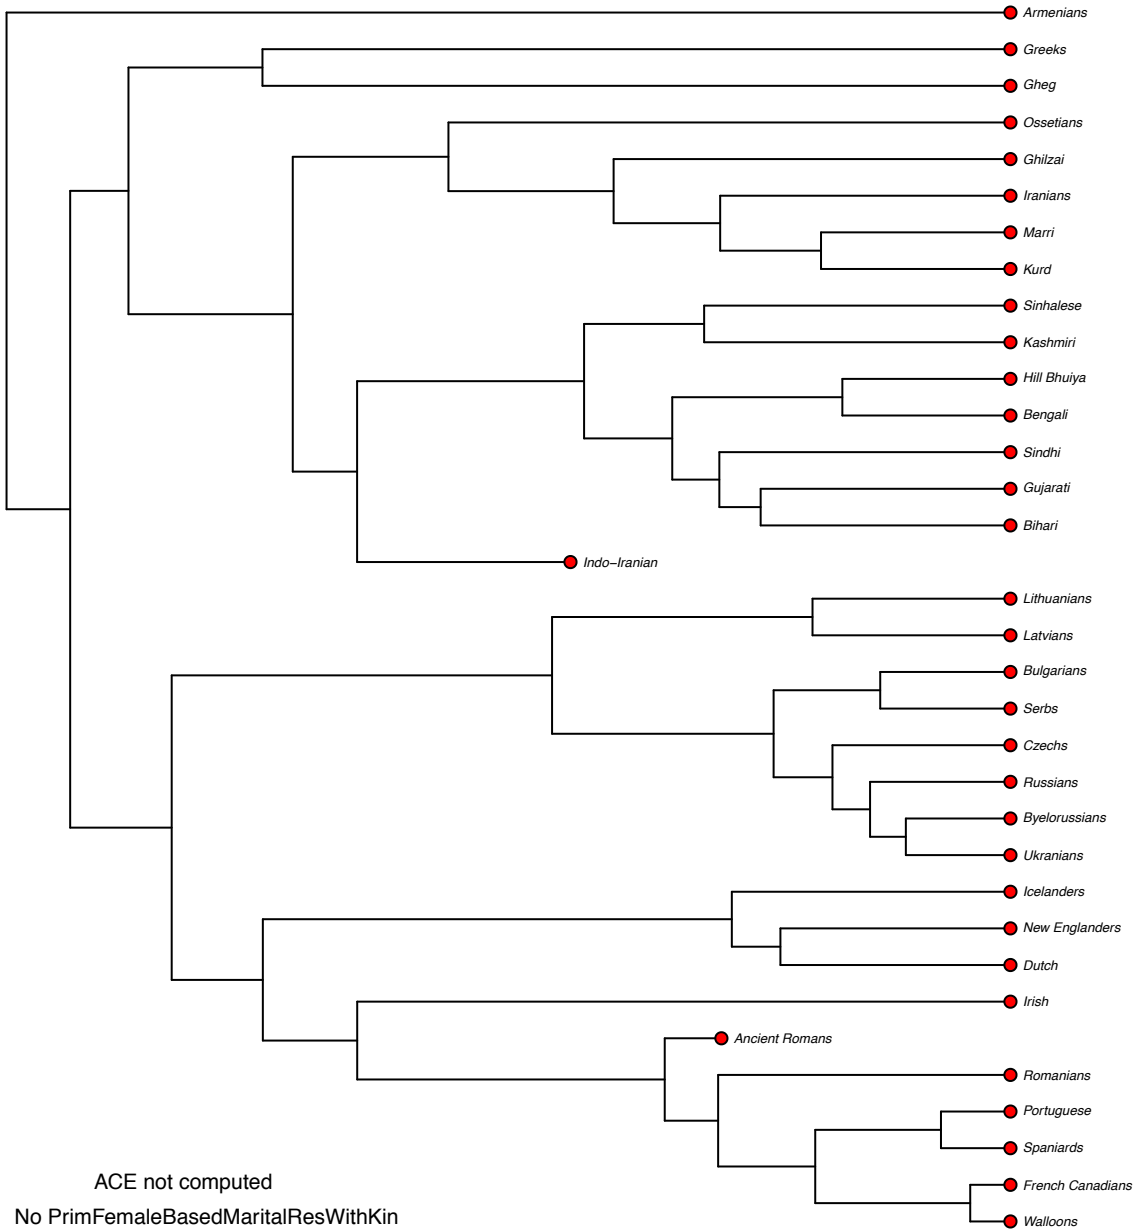

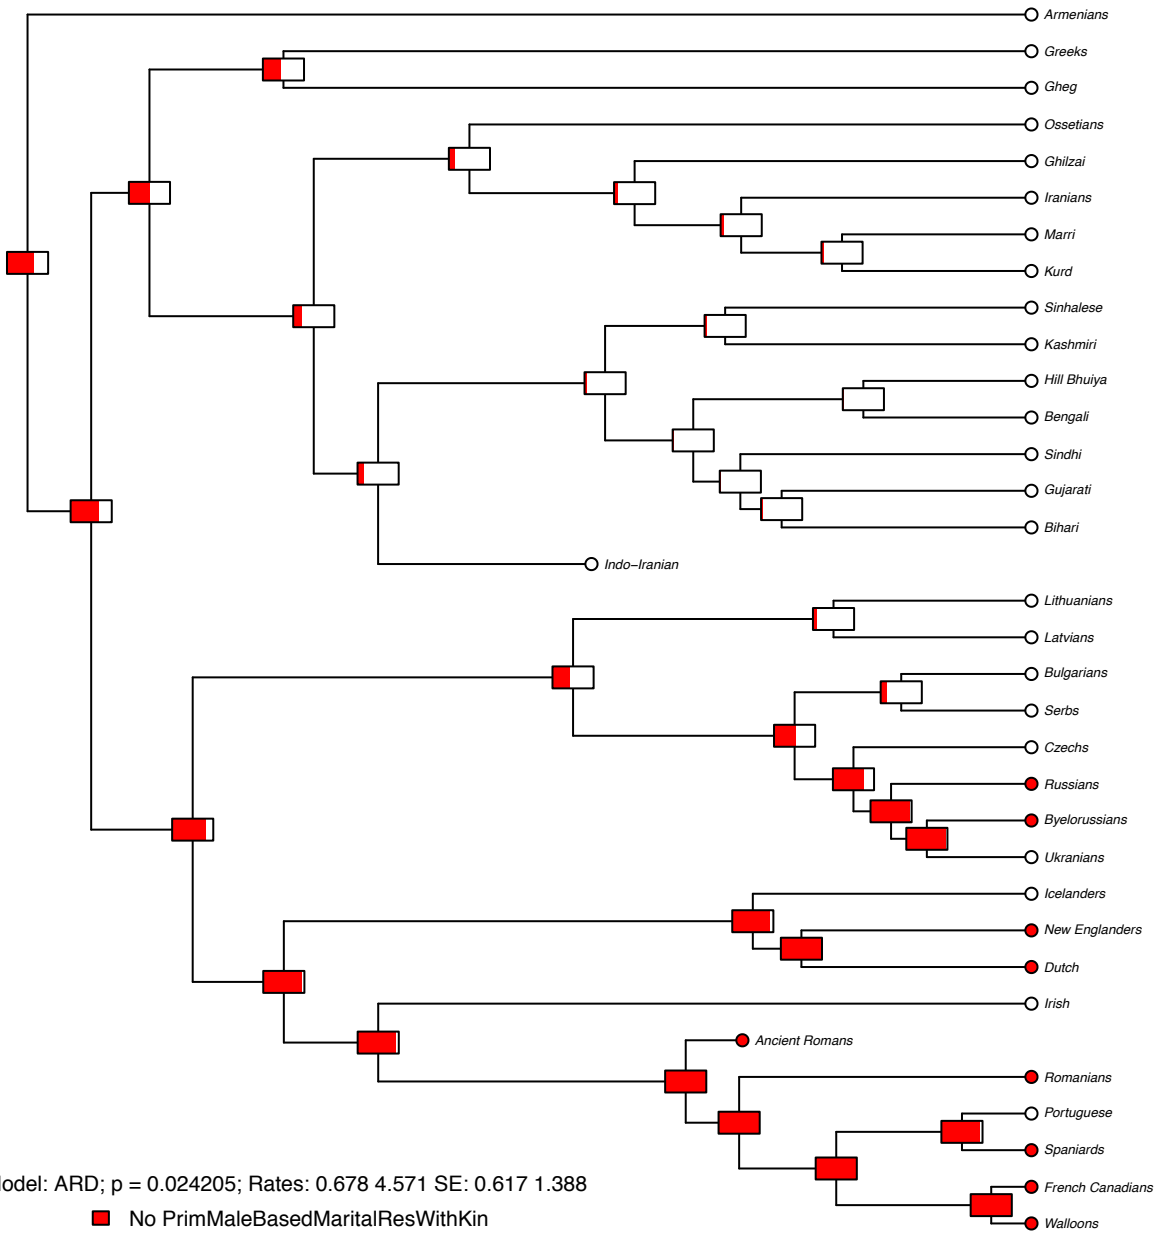

- Armenians
- Greeks
- Gheg
- Ossetians
- Ghilzai
- Iranian
- Marri
- Kurd
- Sinhalese
- Kashmiri
- Hill Bhuiya
- Bengali
- Sindhi
- Gujarati
- Bihari
- Indo-Iranian
- Lithuanians
- Latvians
- Bulgarians
- Serbs
- Czechs
- Russians
- Byelorussians
- Ukrainians
- Icelanders
- New Englanders
- Dutch
- Irish
- Ancient Romans
- Romanians
- Portuguese
- Spaniards
- French Canadians
- Walloons

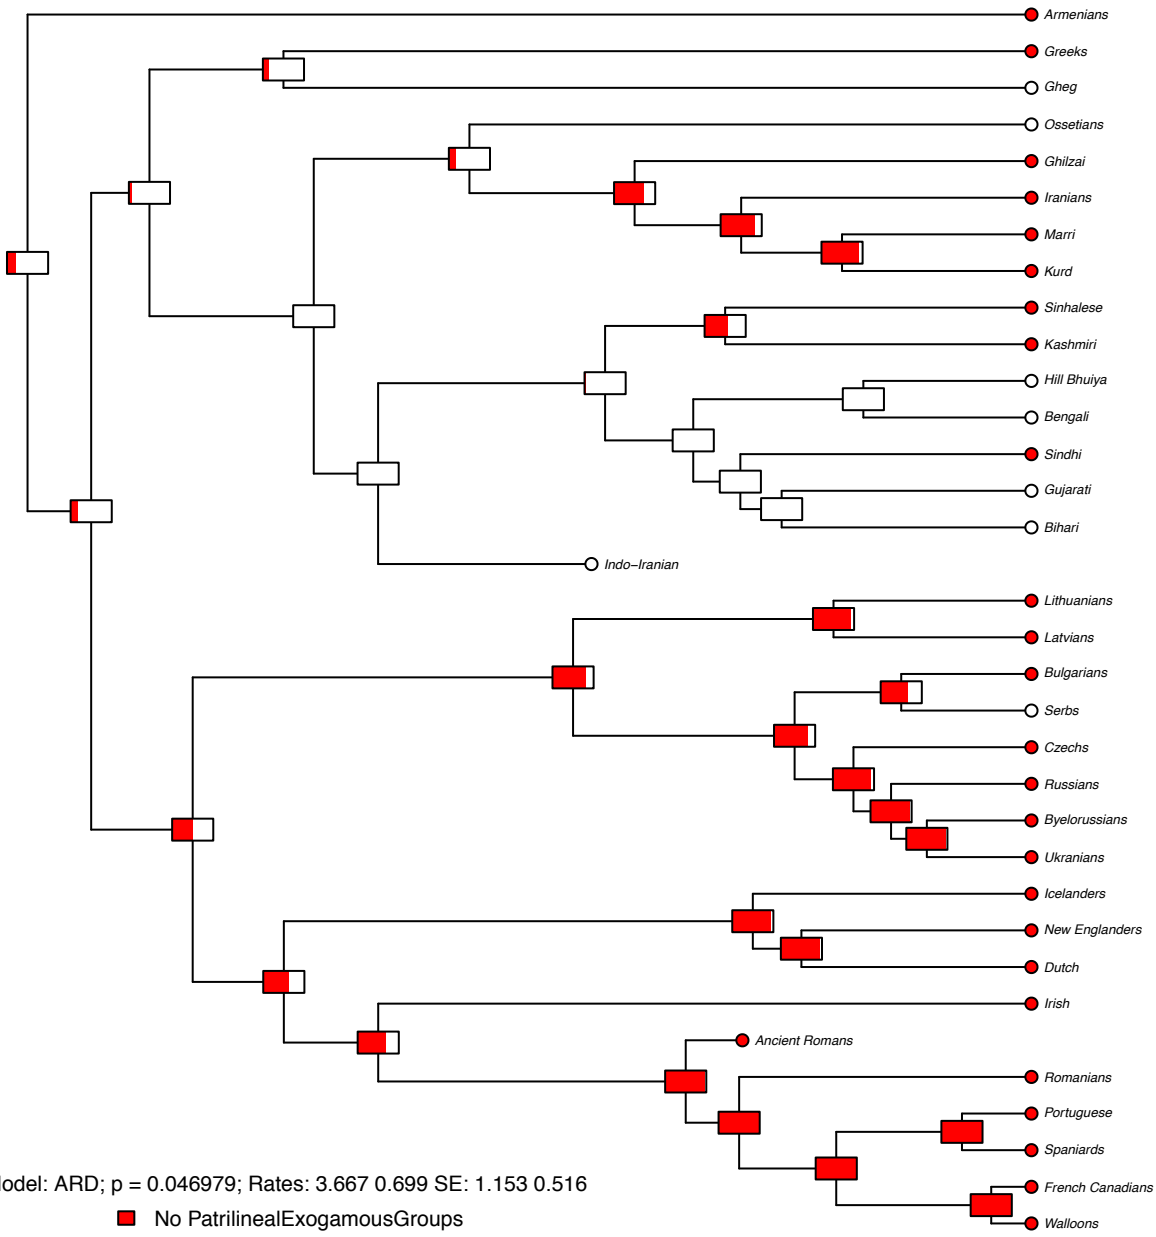

Model: ARD;  $p = 0.046979$ ; Rates: 3.667 0.699 SE: 1.153 0.516

- No Patrilineal Exogamous Groups
- Patrilineal Exogamous Groups

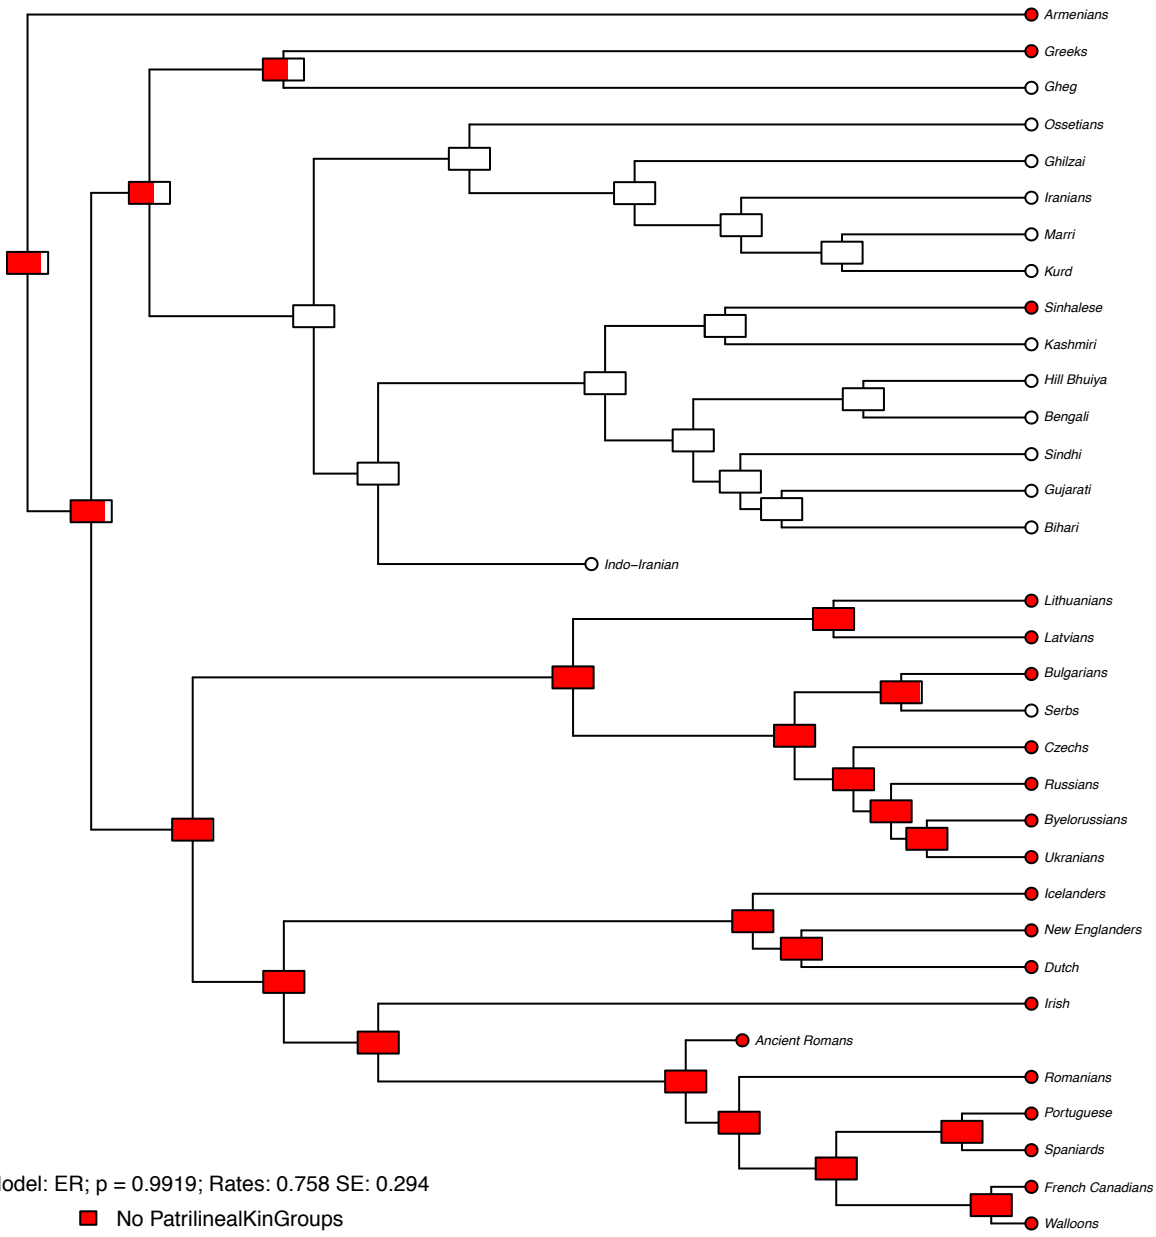

Model: ER;  $p = 0.9919$ ; Rates: 0.758 SE: 0.294

- No PatrilinealKinGroups
- PatrilinealKinGroups

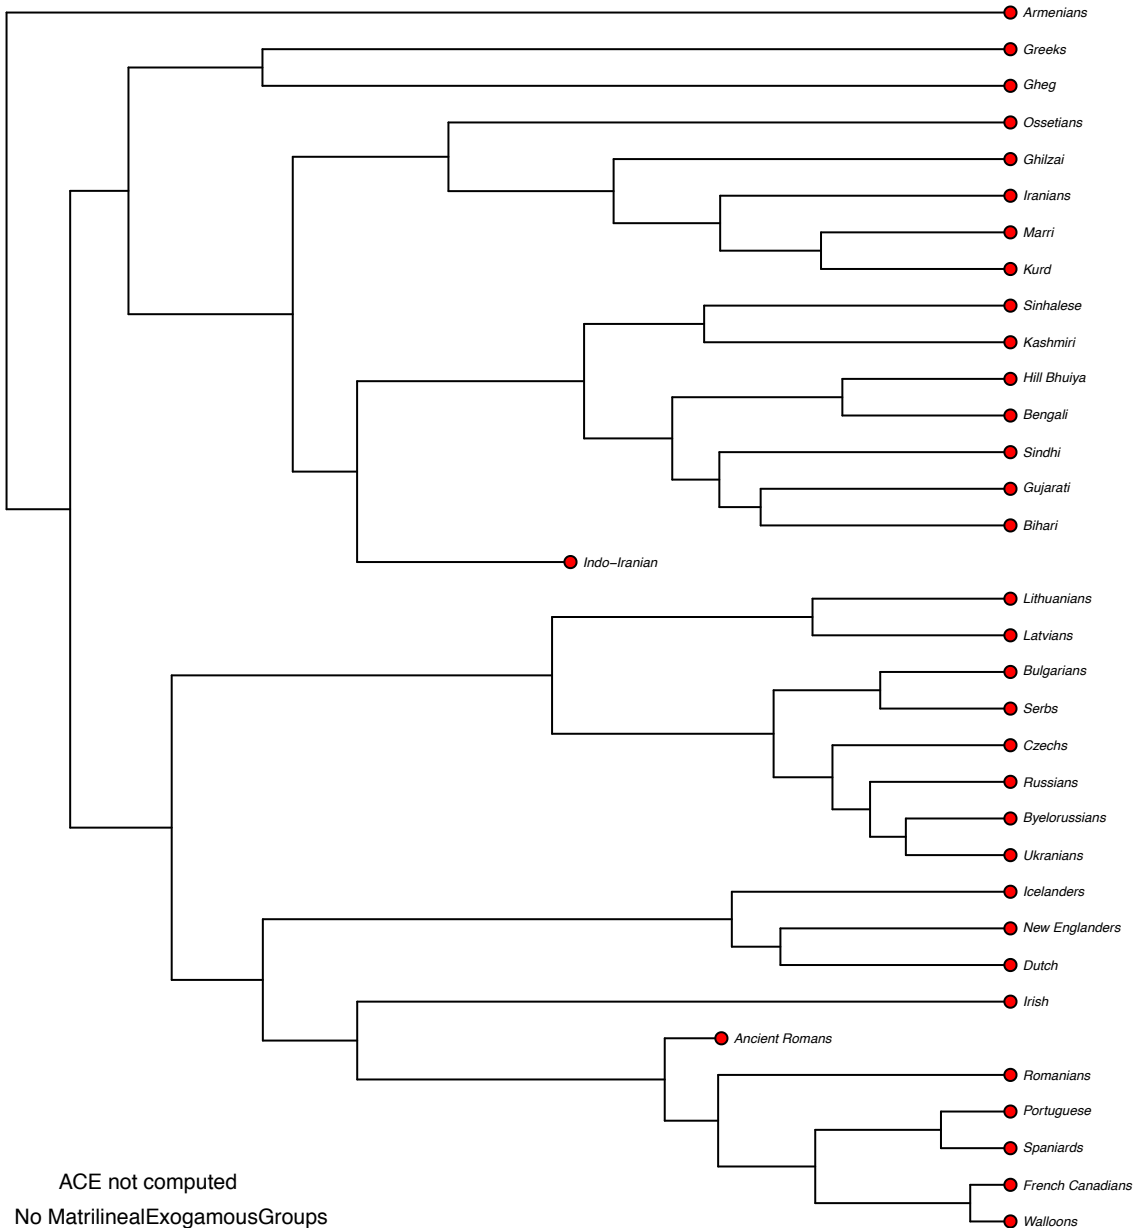

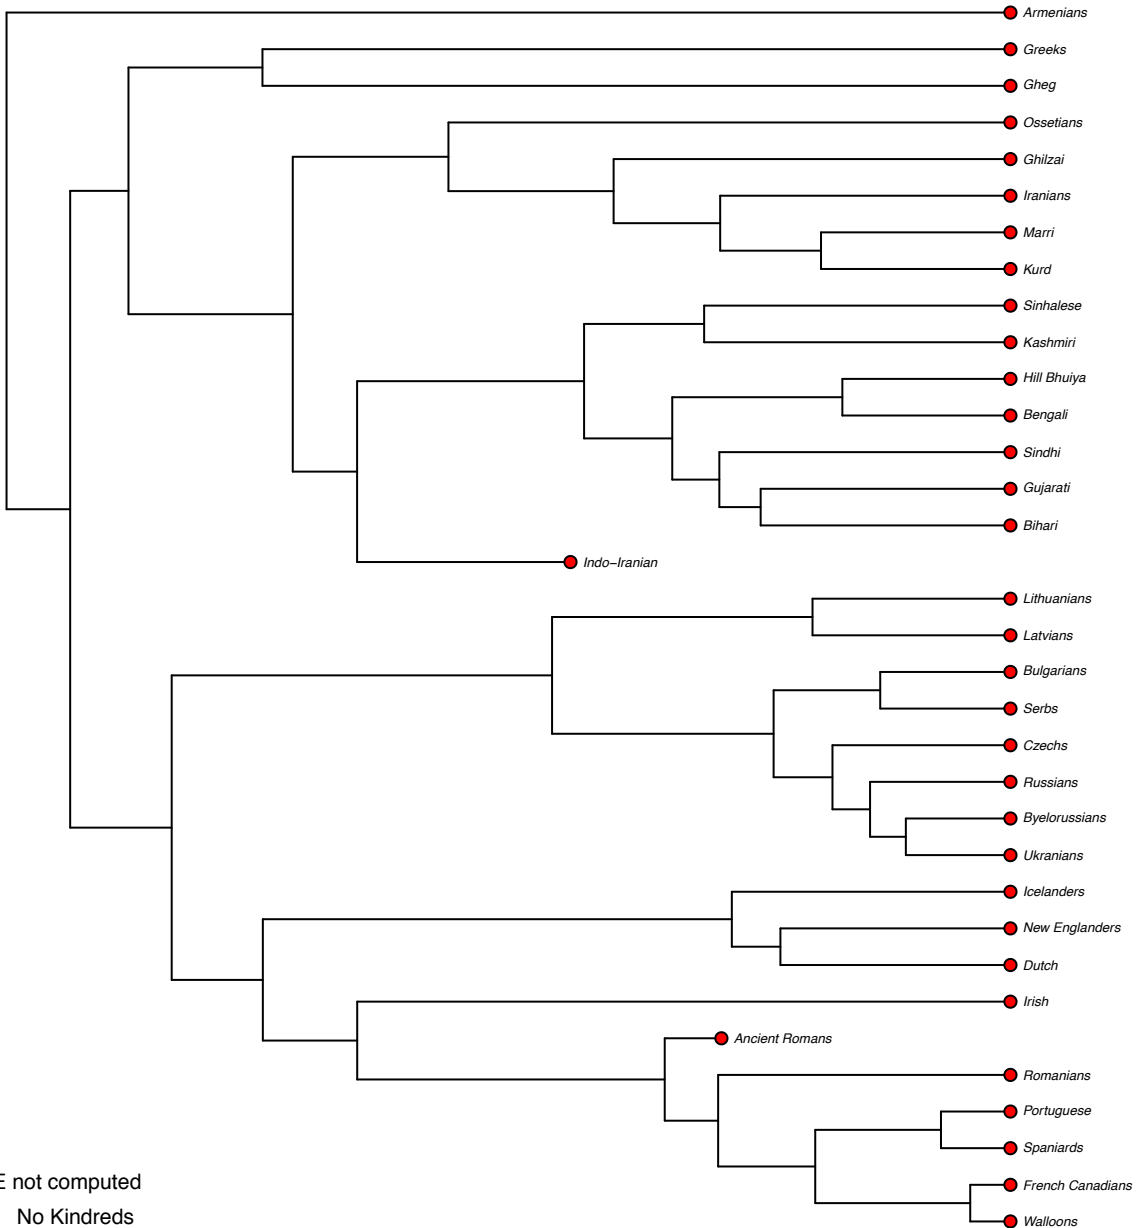

ACE not computed

- No Kindreds
- Kindreds



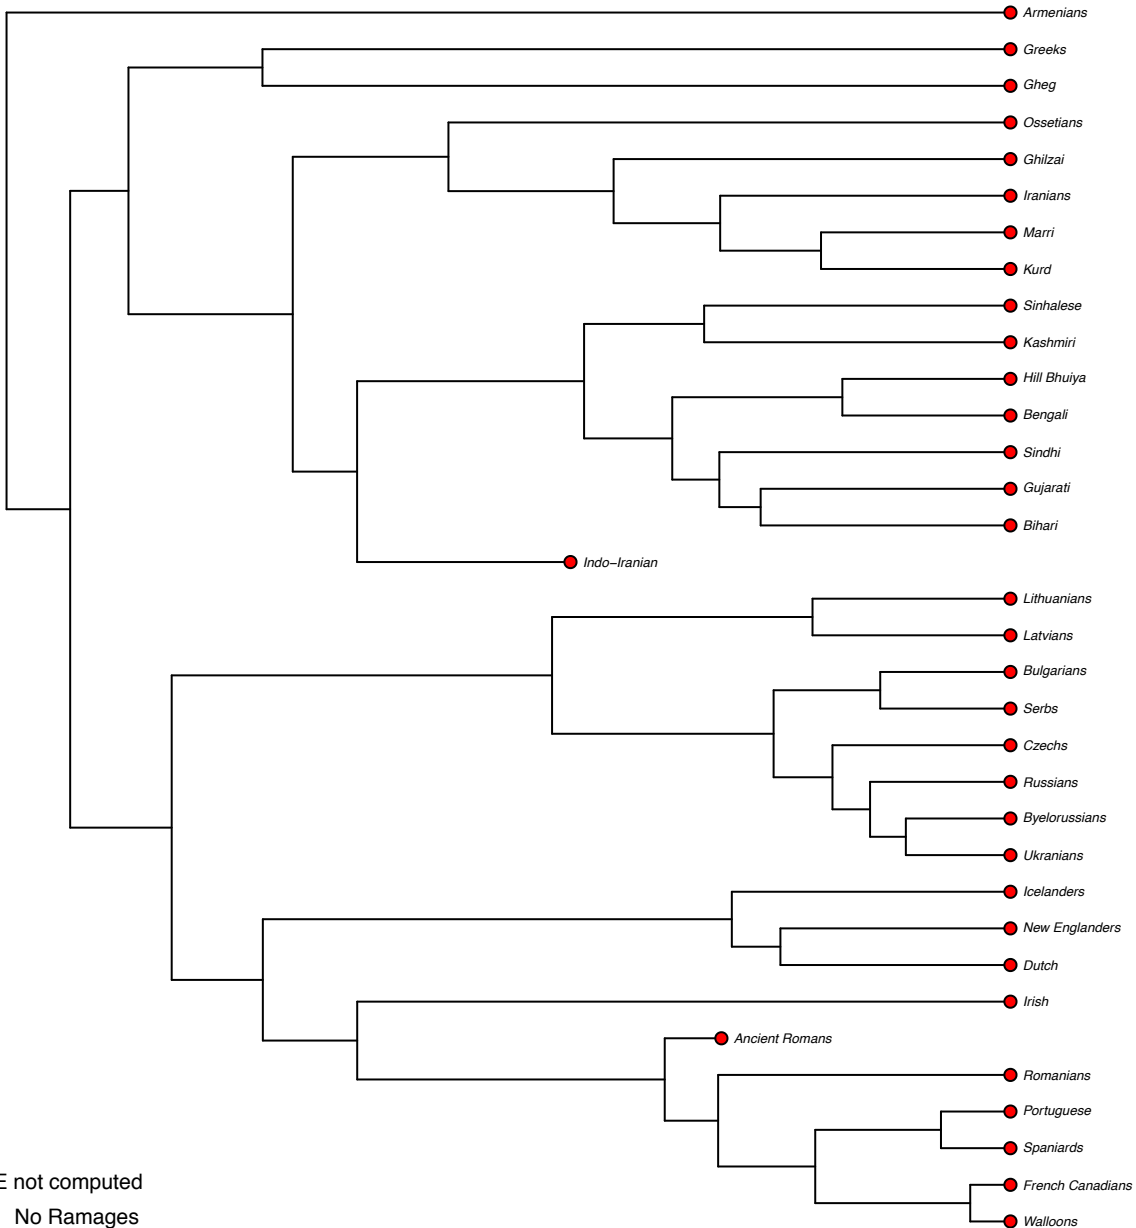

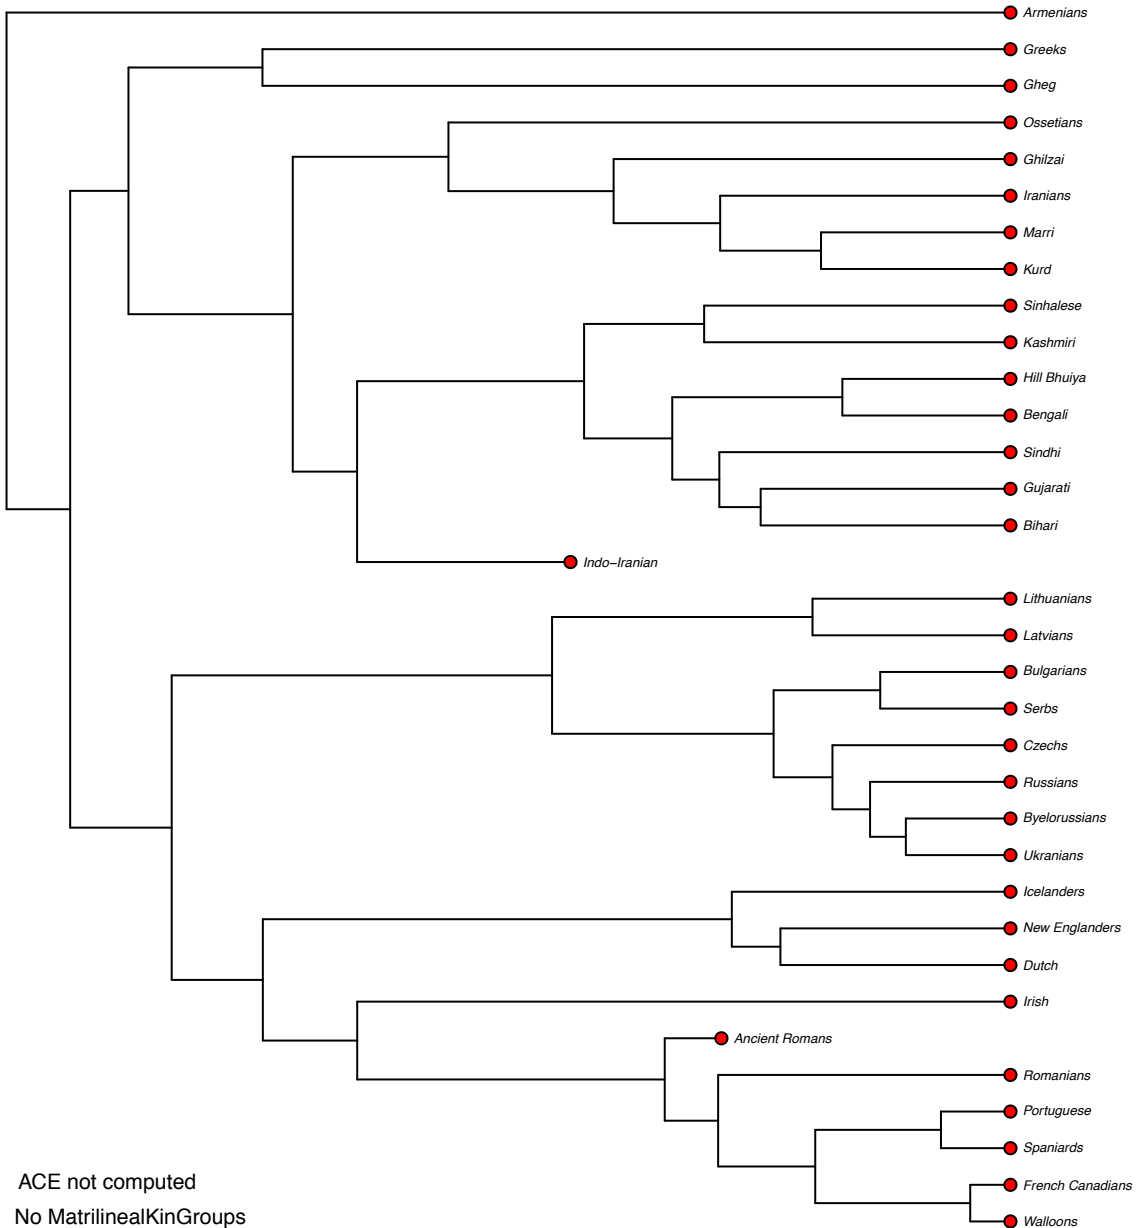

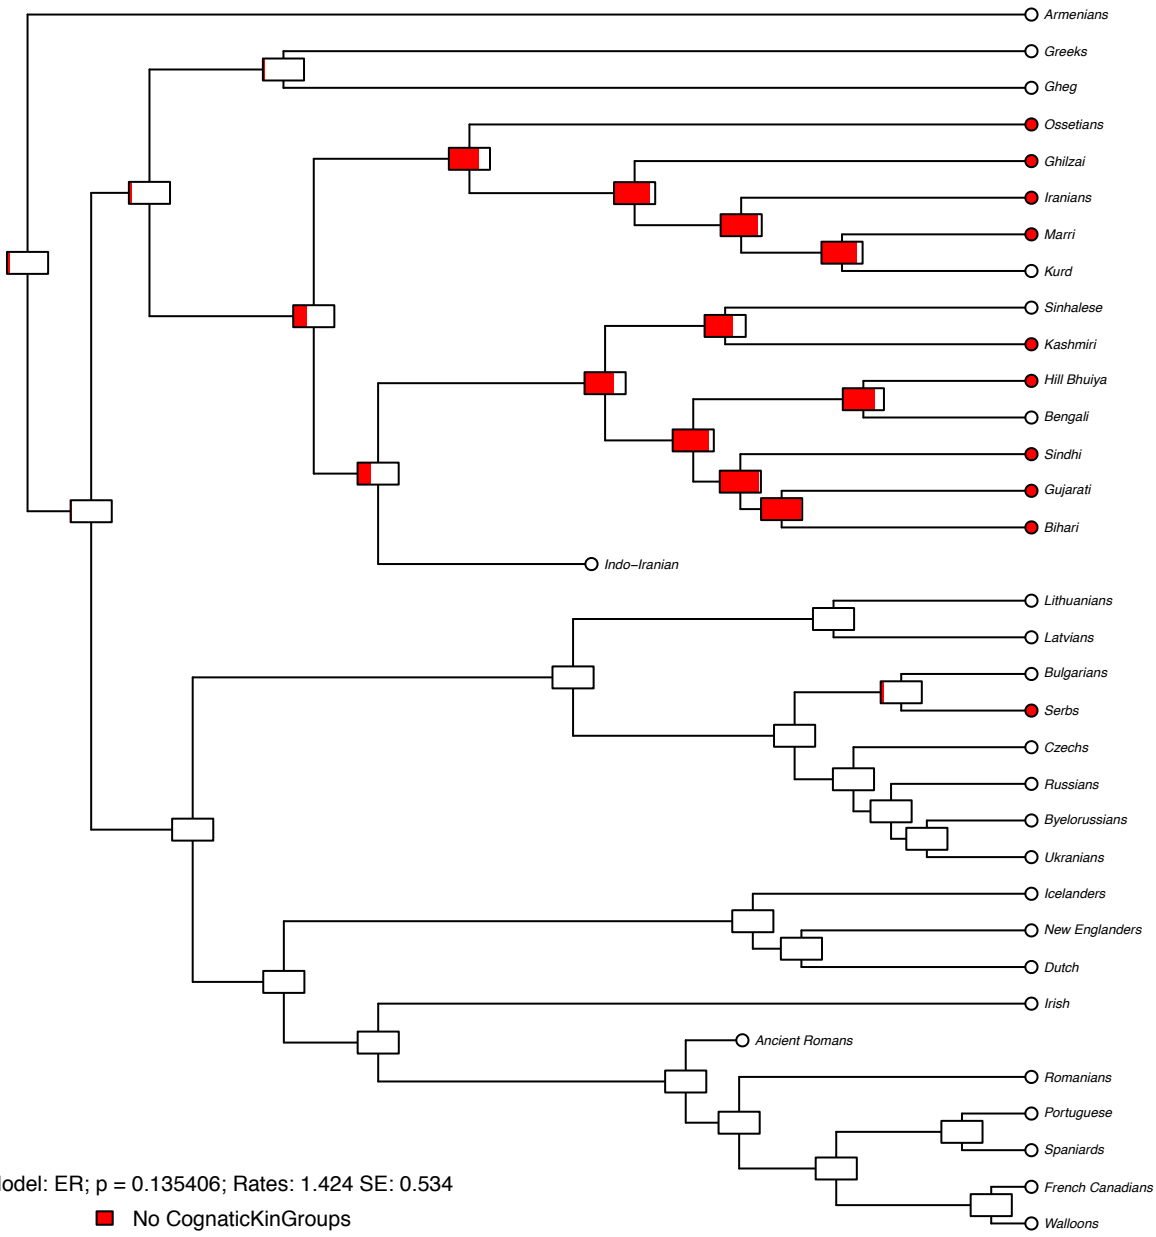

Model: ER;  $p = 0.135406$ ; Rates: 1.424 SE: 0.534

- No CognaticKinGroups
- CognaticKinGroups

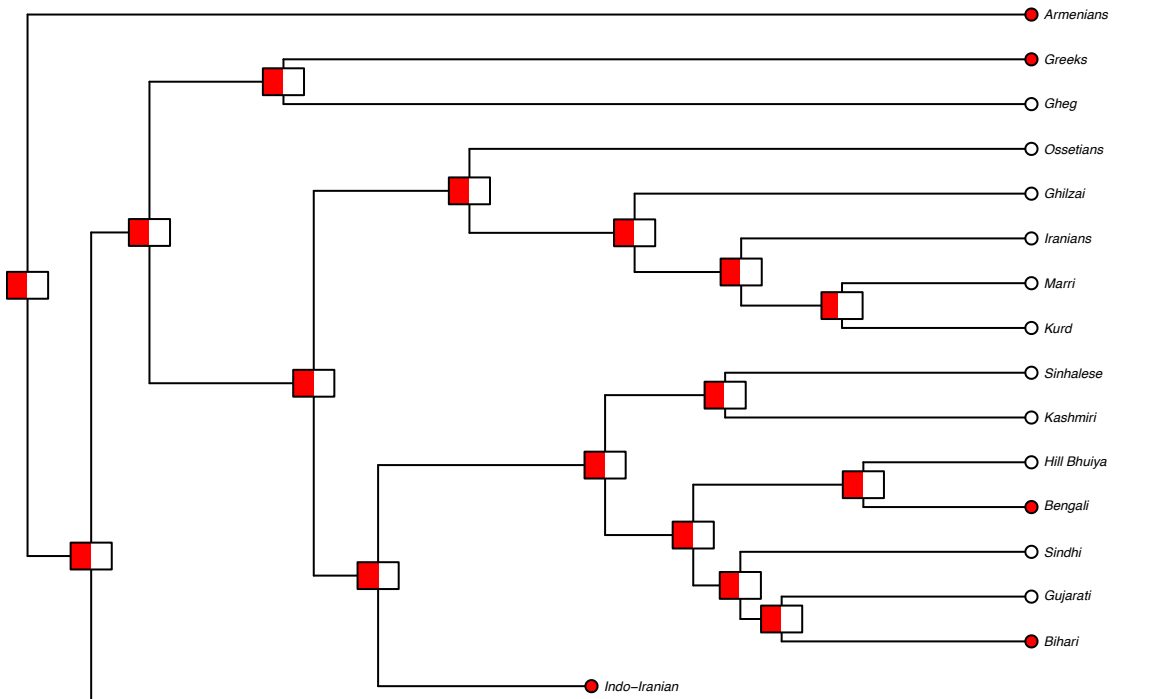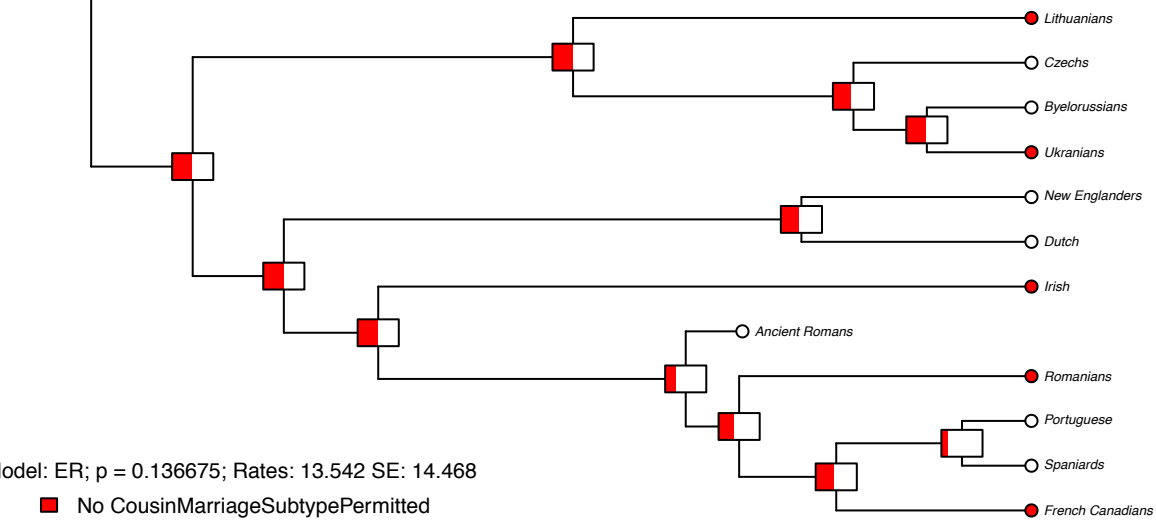

Model: ER;  $p = 0.136675$ ; Rates: 13.542 SE: 14.468

- No Cousin Marriage Subtype Permitted
- Cousin Marriage Subtype Permitted

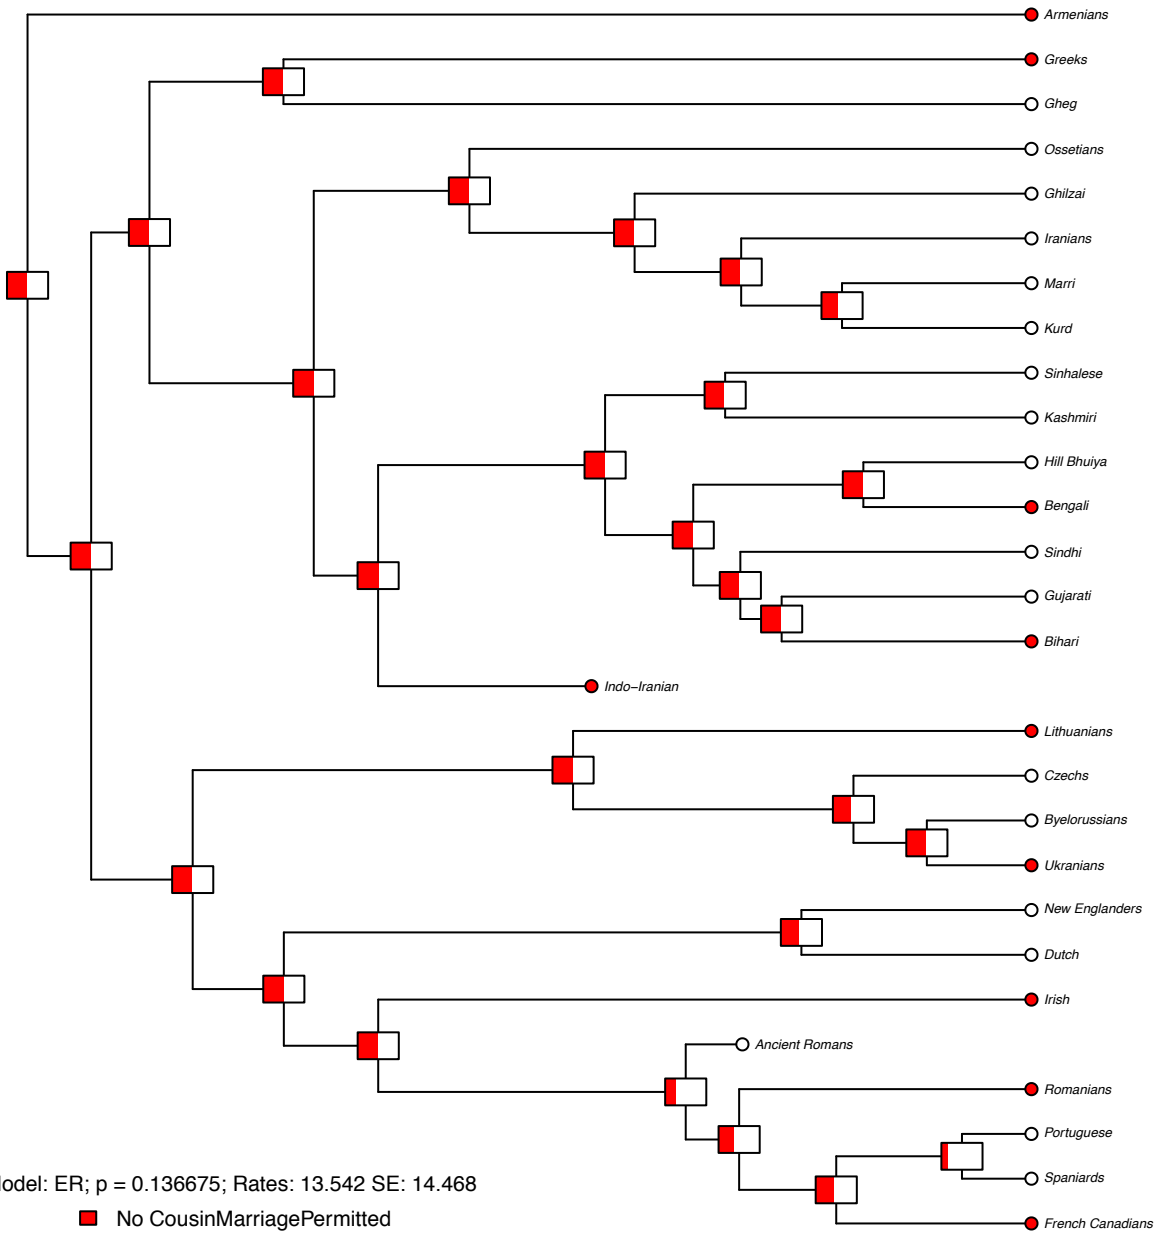

Model: ER;  $p = 0.136675$ ; Rates: 13.542 SE: 14.468

- No Cousin Marriage Permitted
- Cousin Marriage Permitted

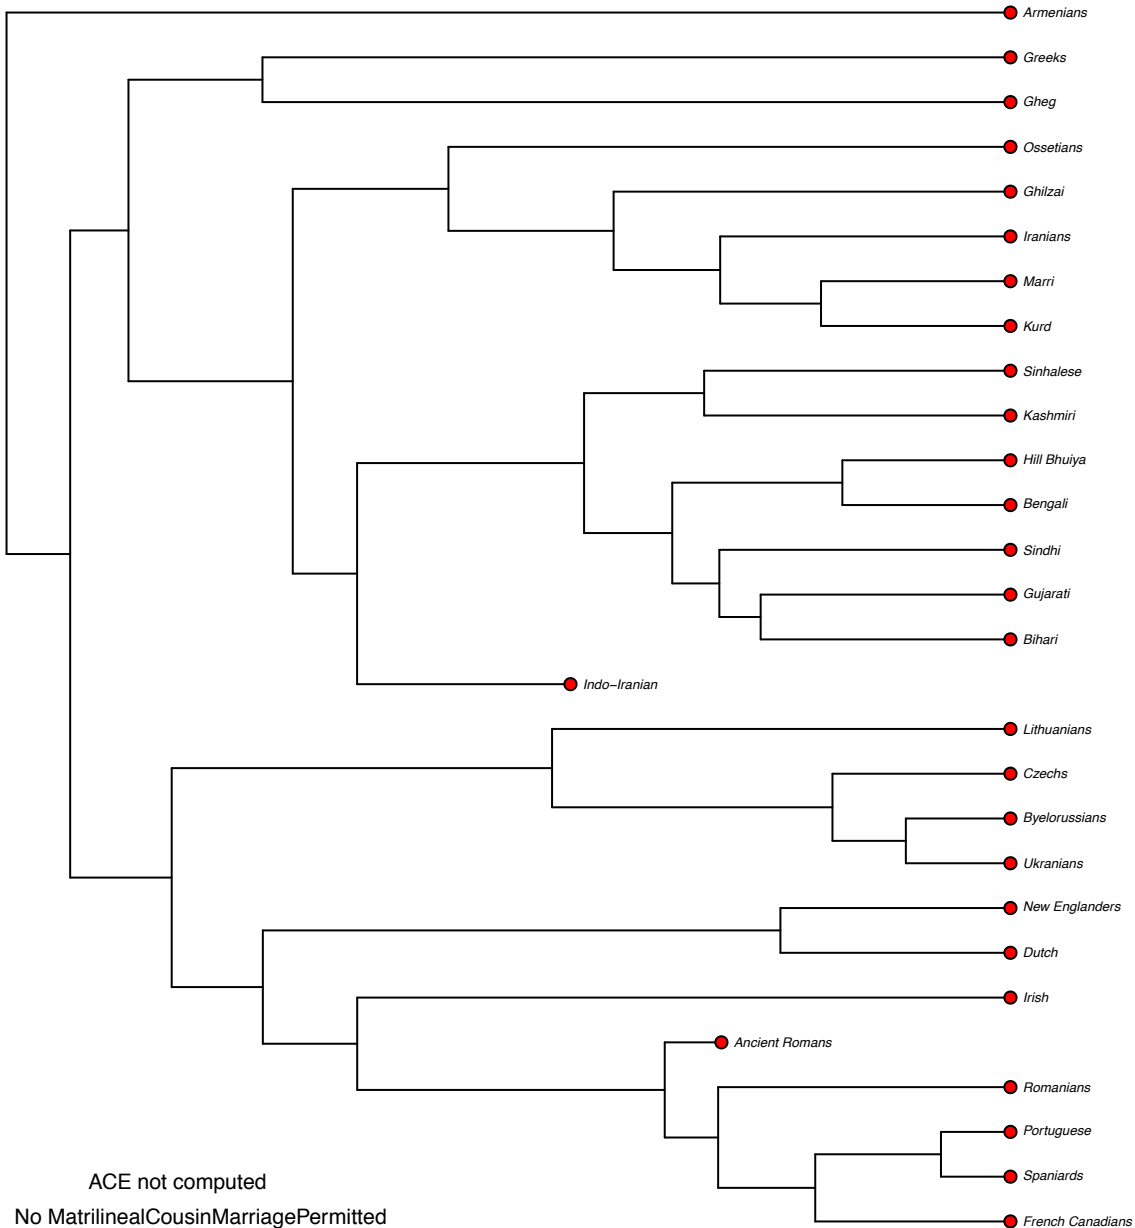

● Armenians

● Greeks

● Ghag

● Ossetians

● Ghilzai

● Iranians

● Marri

● Kurd

● Sinhalese

● Kashmiri

● Hill Bhuiya

● Bengali

● Sindhi

● Gujarati

● Bihari

● Indo-Iranian

● Lithuanians

● Czechs

● Byelorussians

● Ukrainians

● New Englanders

● Dutch

● Irish

● Ancient Romans

● Romanians

● Portuguese

● Spaniards

● French Canadians

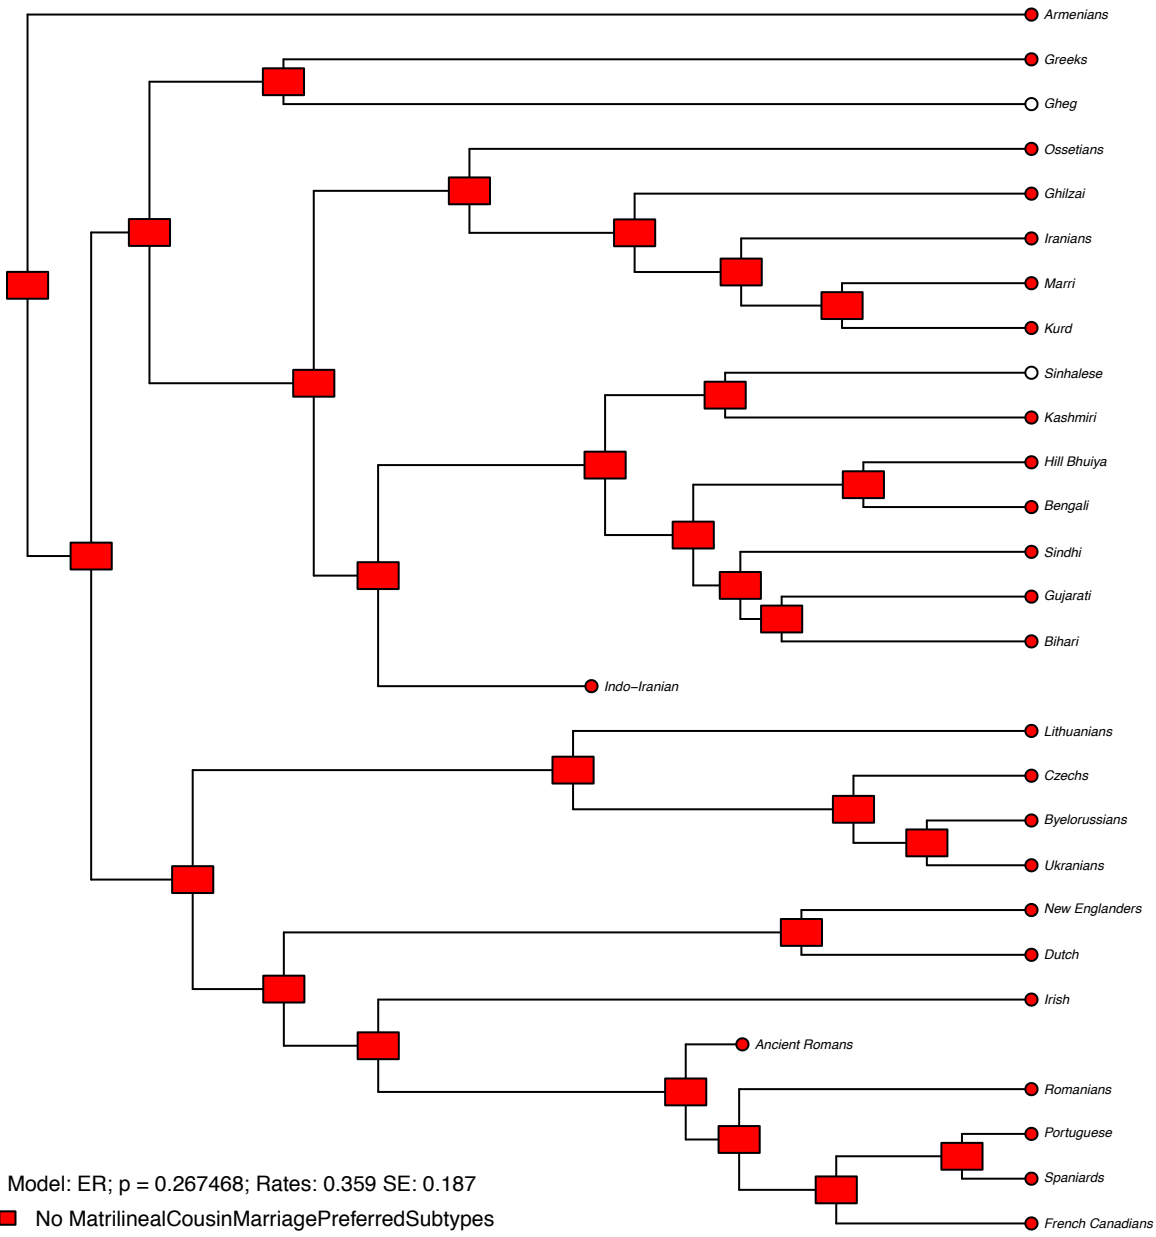

- Armenians
- Greeks
- Gheg
- Ossetians
- Ghilzai
- Iranians
- Marri
- Kurd
- Sinhalese
- Kashmiri
- Hill Bhuiya
- Bengali
- Sindhi
- Gujarati
- Bihari
- Indo-Iranian
- Lithuanians
- Czechs
- Byelorussians
- Ukrainians
- New Englanders
- Dutch
- Irish
- Ancient Romans
- Romanians
- Portuguese
- Spaniards
- French Canadians

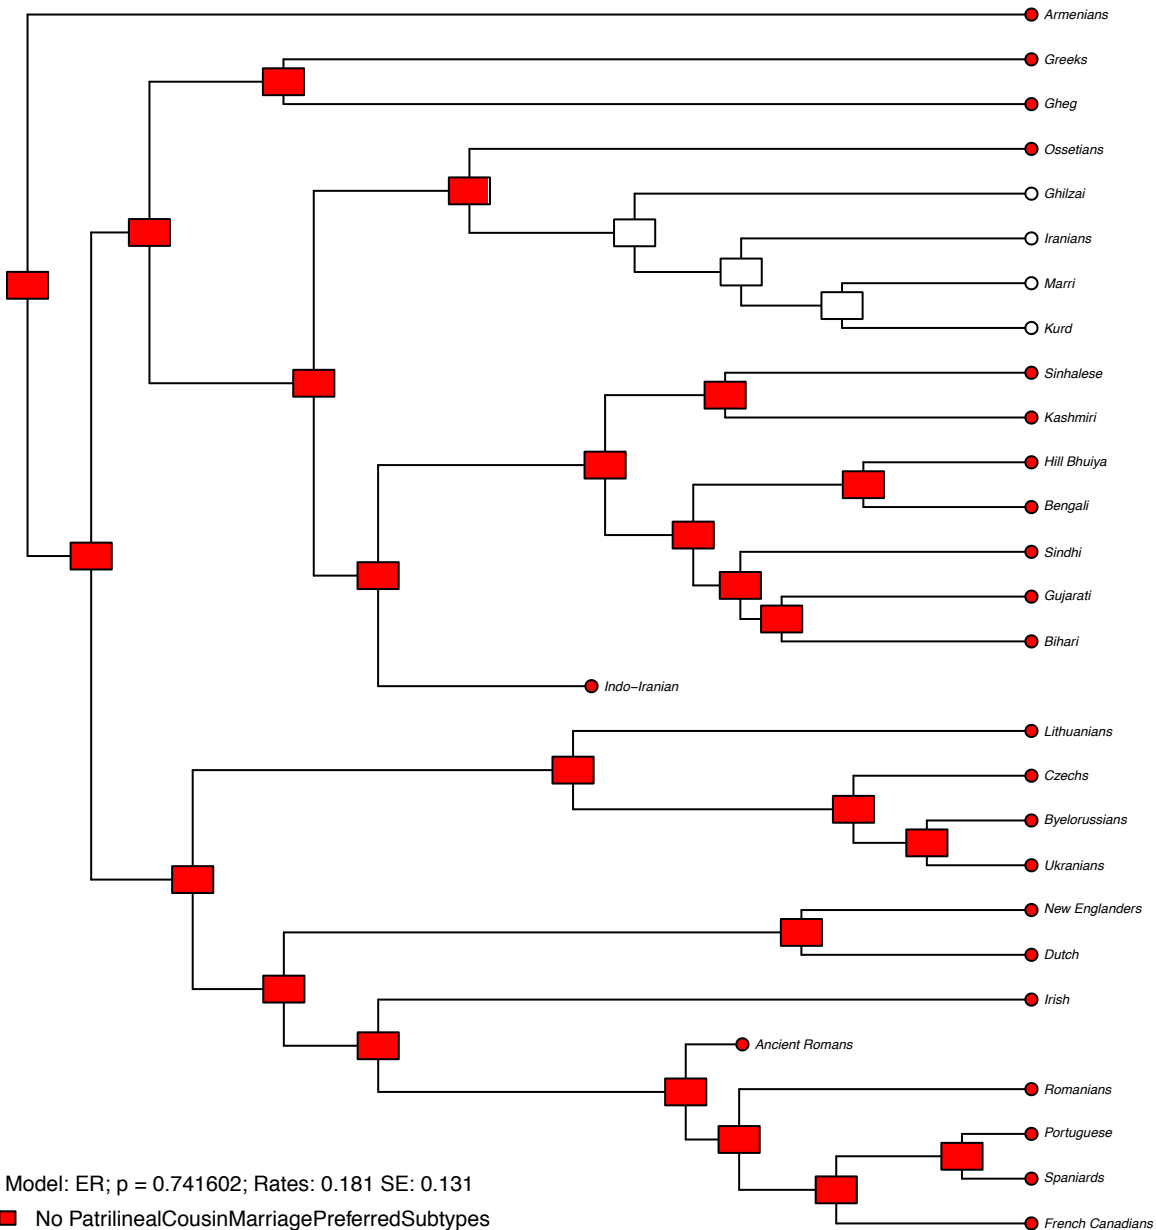

Model: ER;  $p = 0.741602$ ; Rates: 0.181 SE: 0.131

- No PatrilinealCousinMarriagePreferredSubtypes
- PatrilinealCousinMarriagePreferredSubtypes



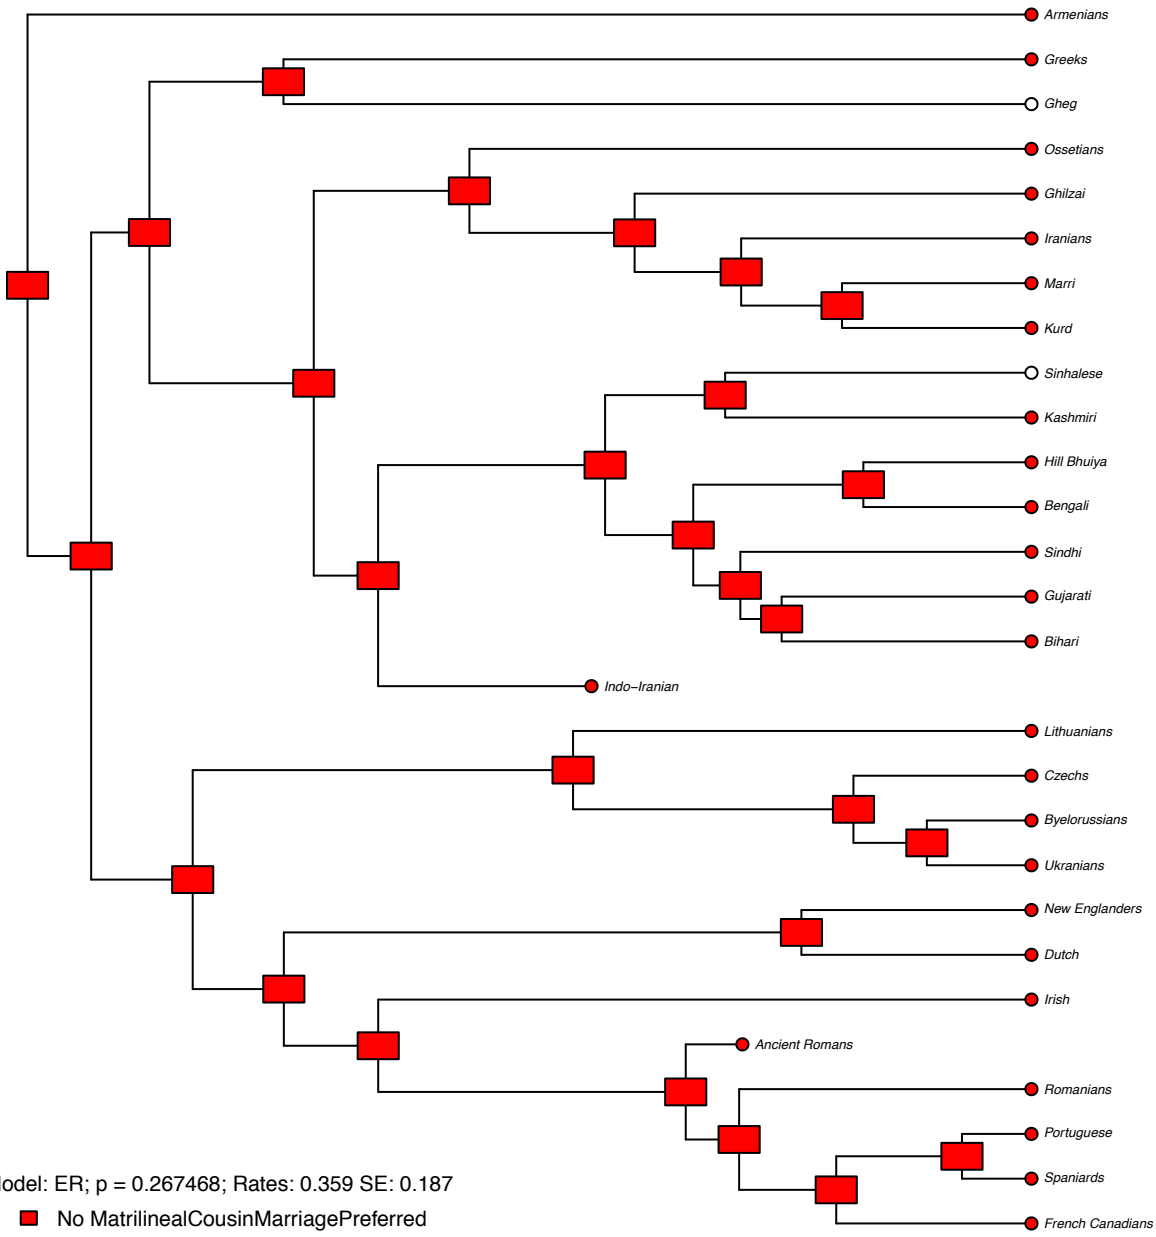

Model: ER;  $p = 0.267468$ ; Rates: 0.359 SE: 0.187

- No MatrilinealCousinMarriagePreferred
- MatrilinealCousinMarriagePreferred

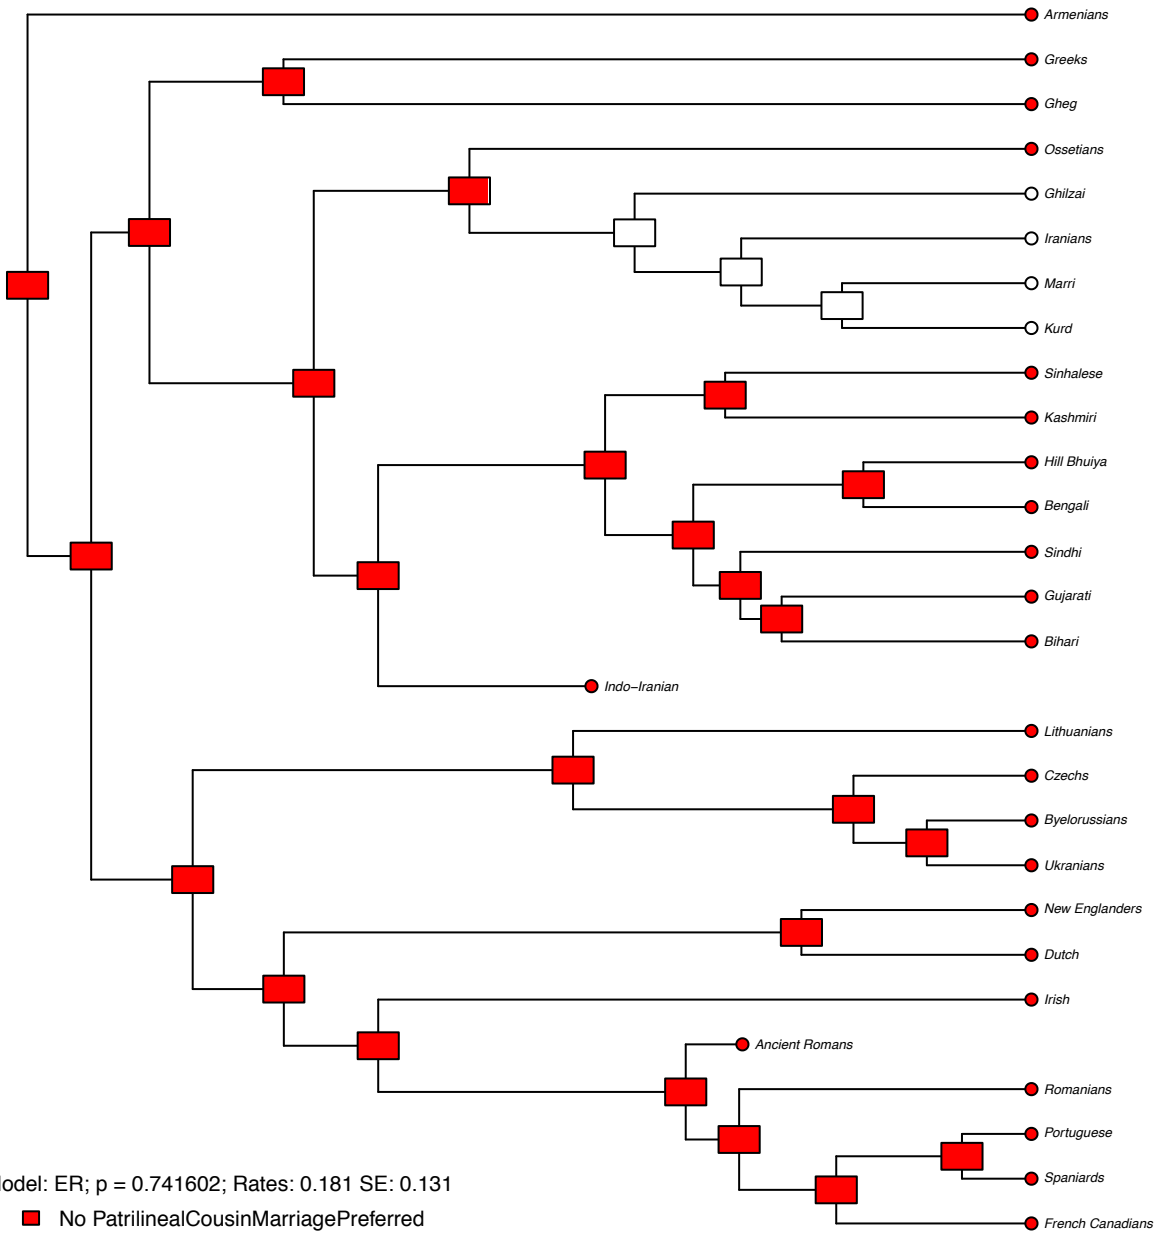

Model: ER;  $p = 0.741602$ ; Rates: 0.181 SE: 0.131

- No PatrilinealCousinMarriagePreferred
- PatrilinealCousinMarriagePreferred

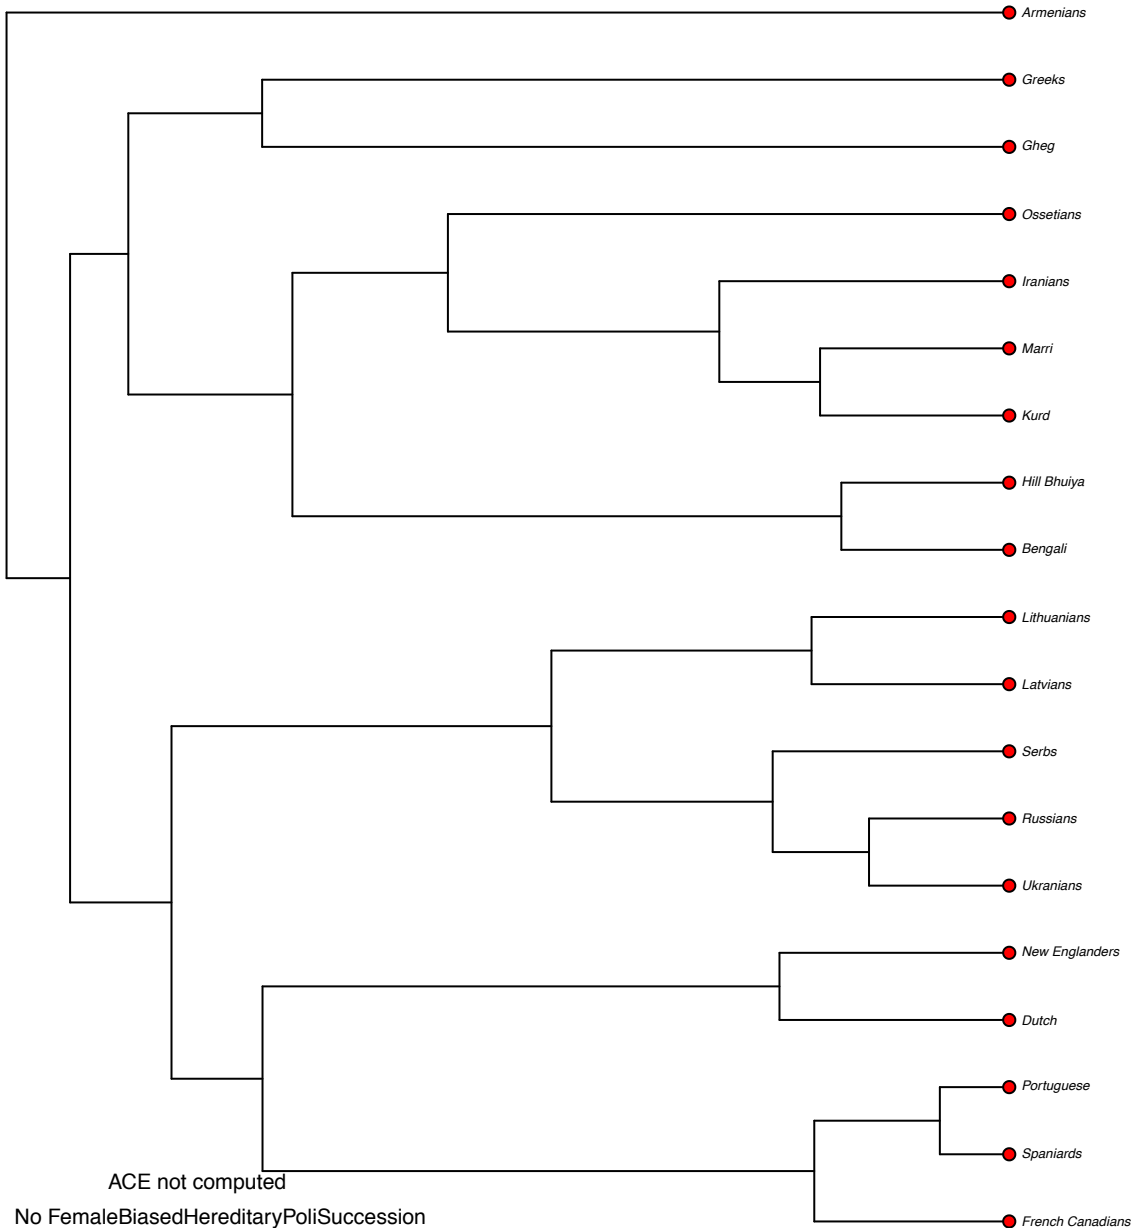

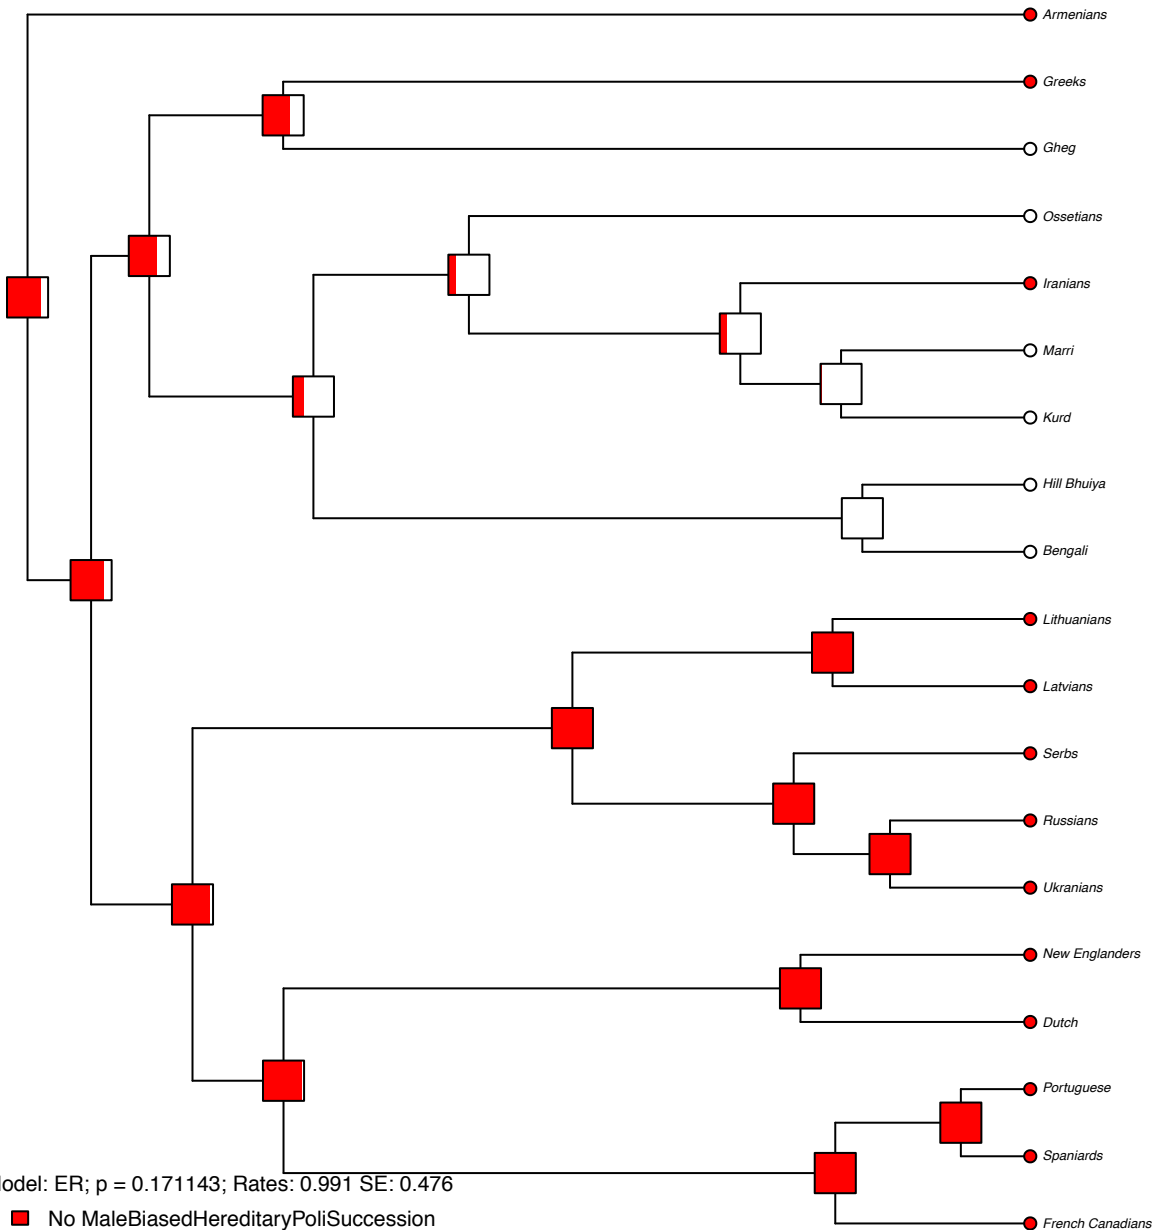

- Armenians
- Greeks
- Ghag
- Ossetians
- Iranians
- Marri
- Kurd
- Hill Bhuiya
- Bengali
- Lithuanians
- Latvians
- Serbs
- Russians
- Ukrainians
- New Englanders
- Dutch
- Portuguese
- Spaniards
- French Canadians

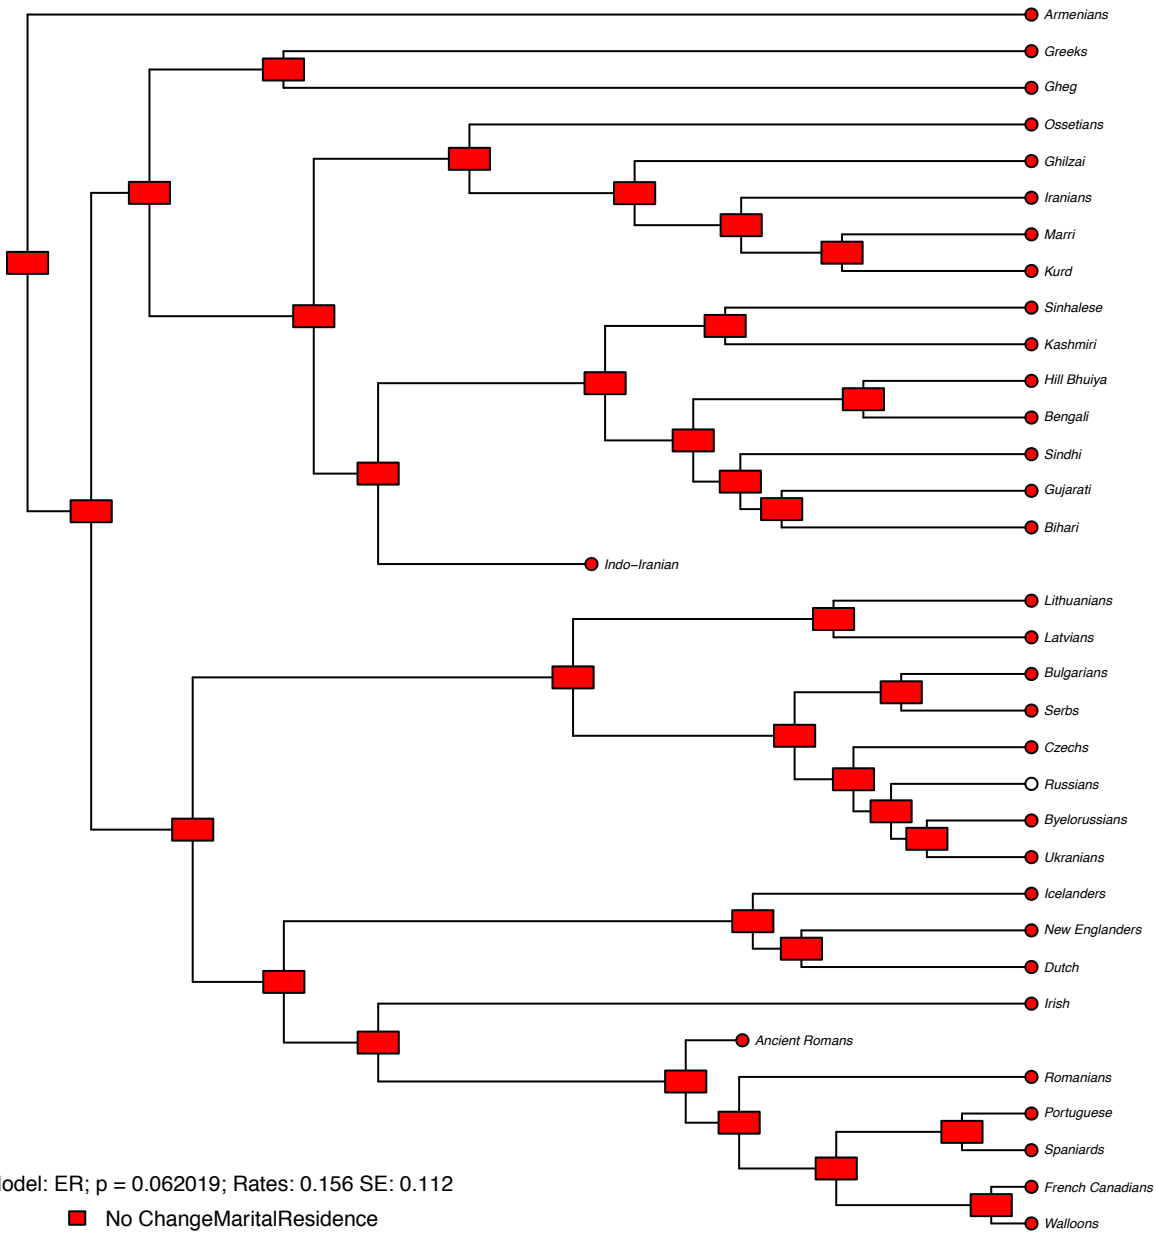

Model: ER;  $p = 0.062019$ ; Rates: 0.156 SE: 0.112

- No ChangeMaritalResidence
- ChangeMaritalResidence

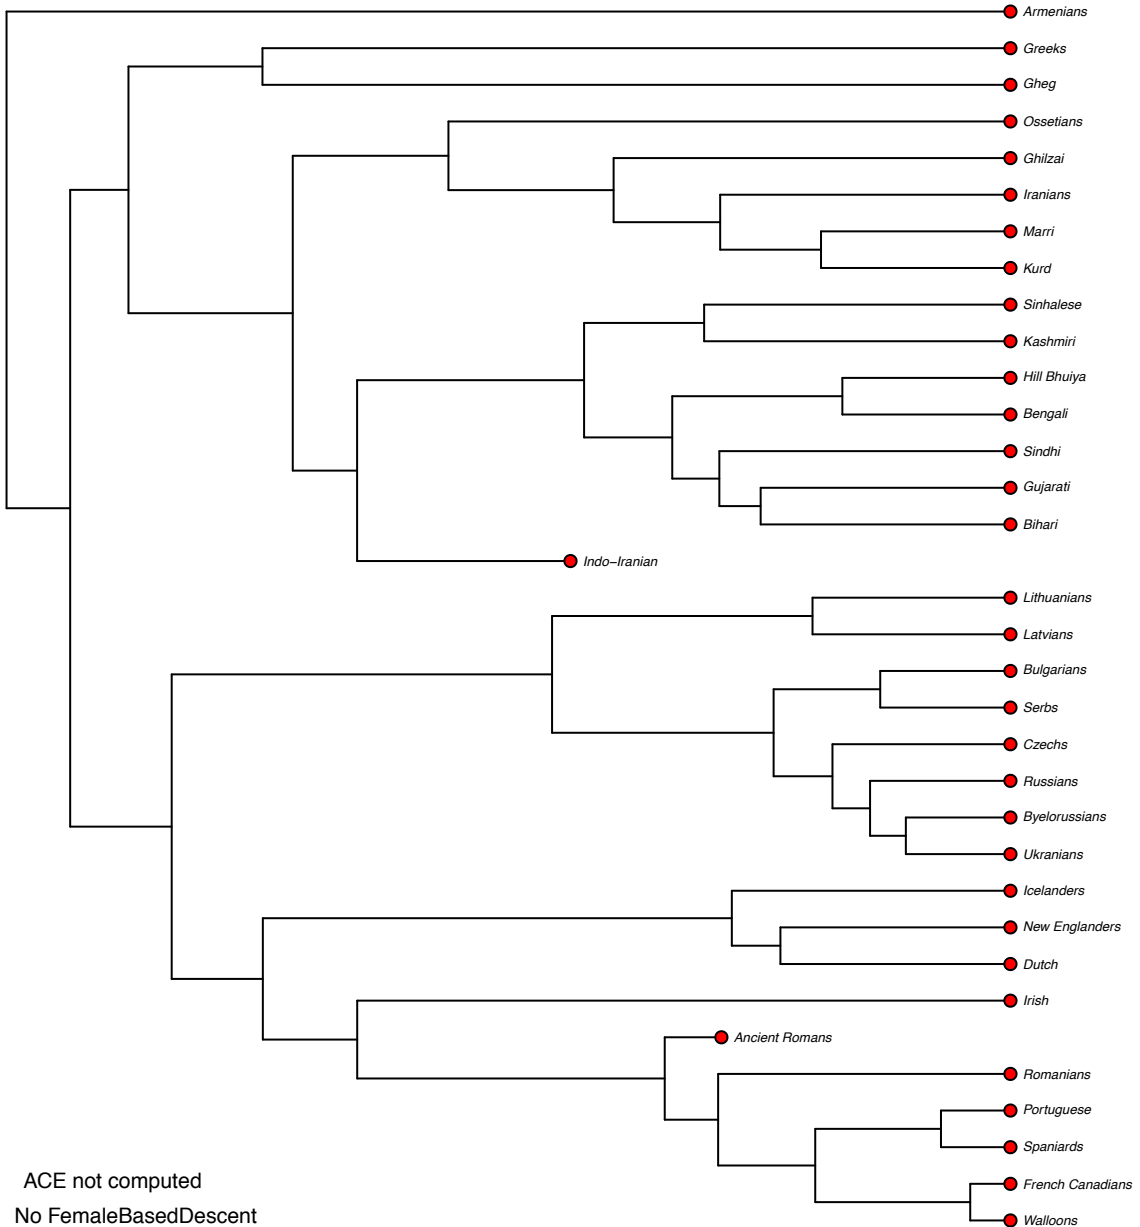

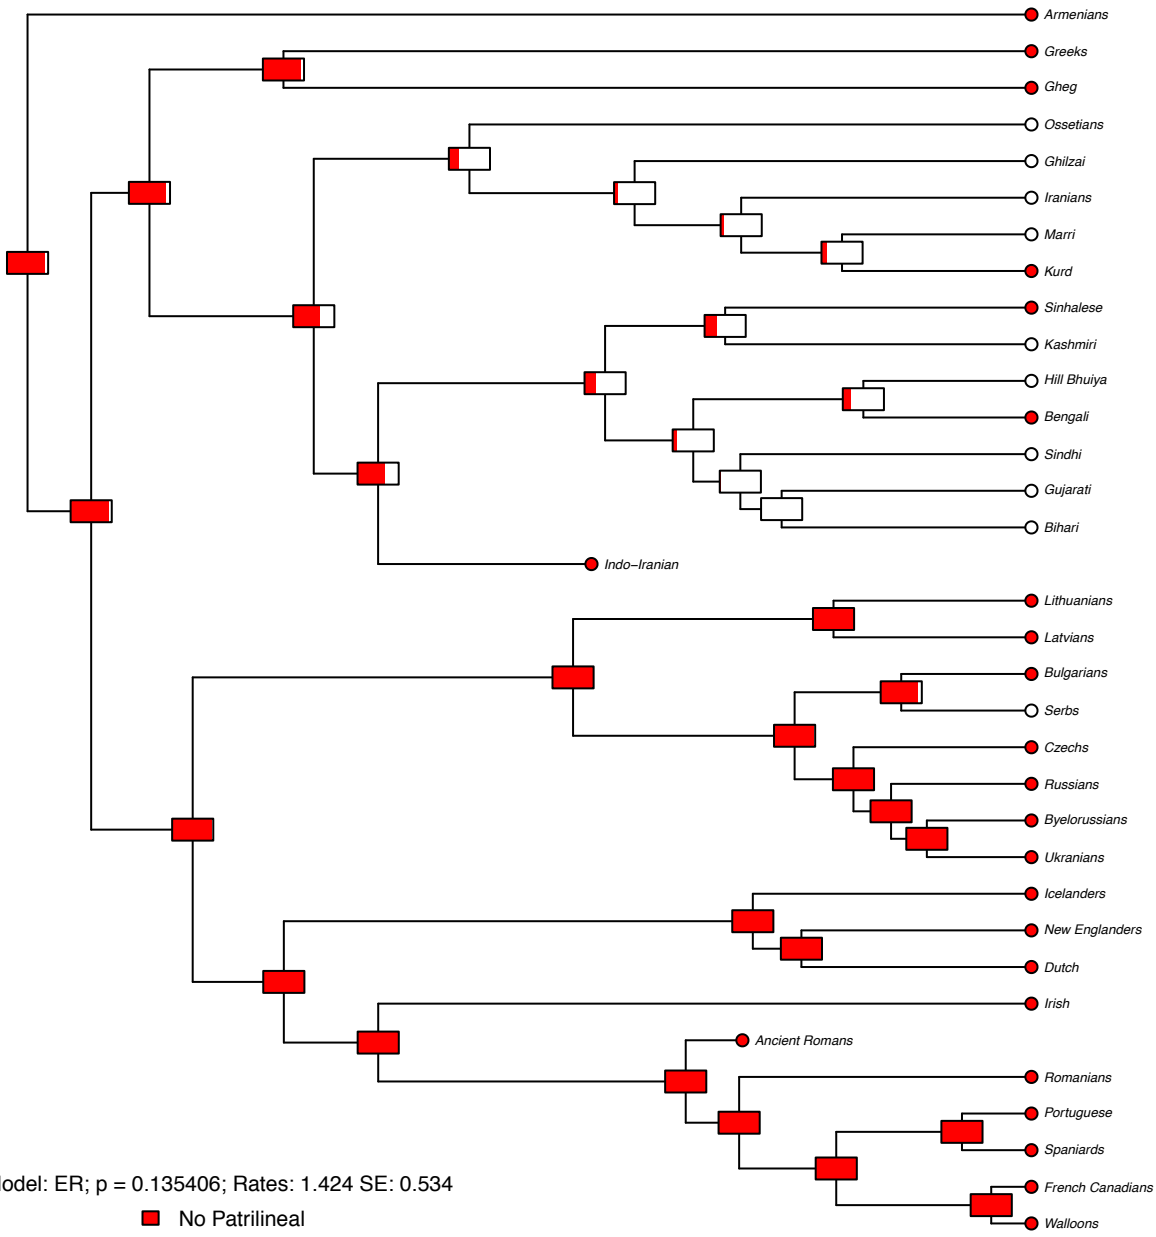

Model: ER;  $p = 0.135406$ ; Rates: 1.424 SE: 0.534

■ No Patrilineal  
 □ Patrilineal

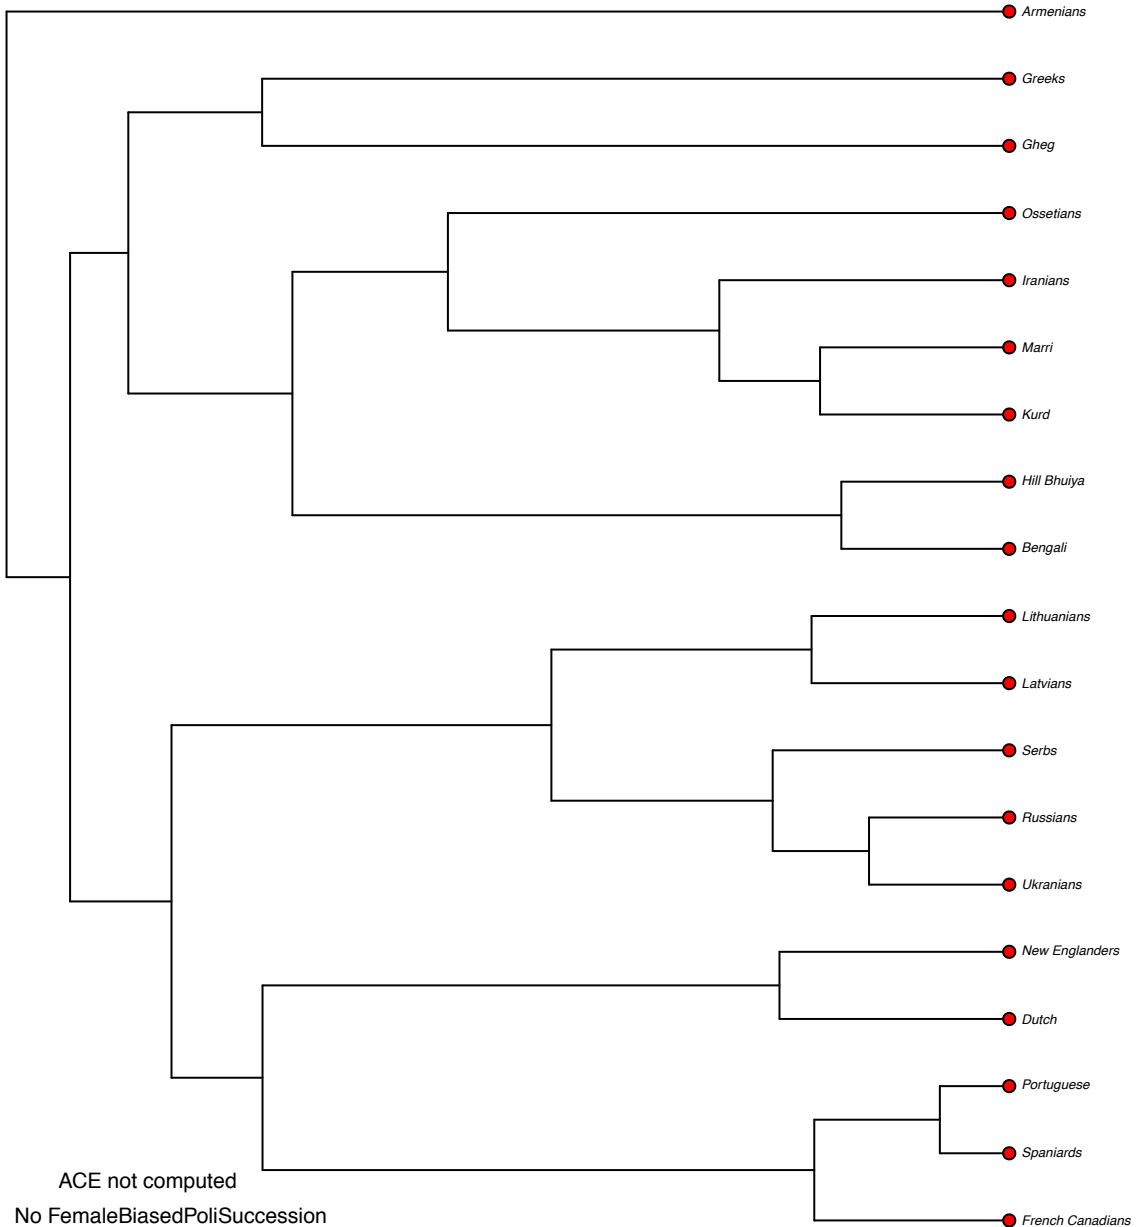



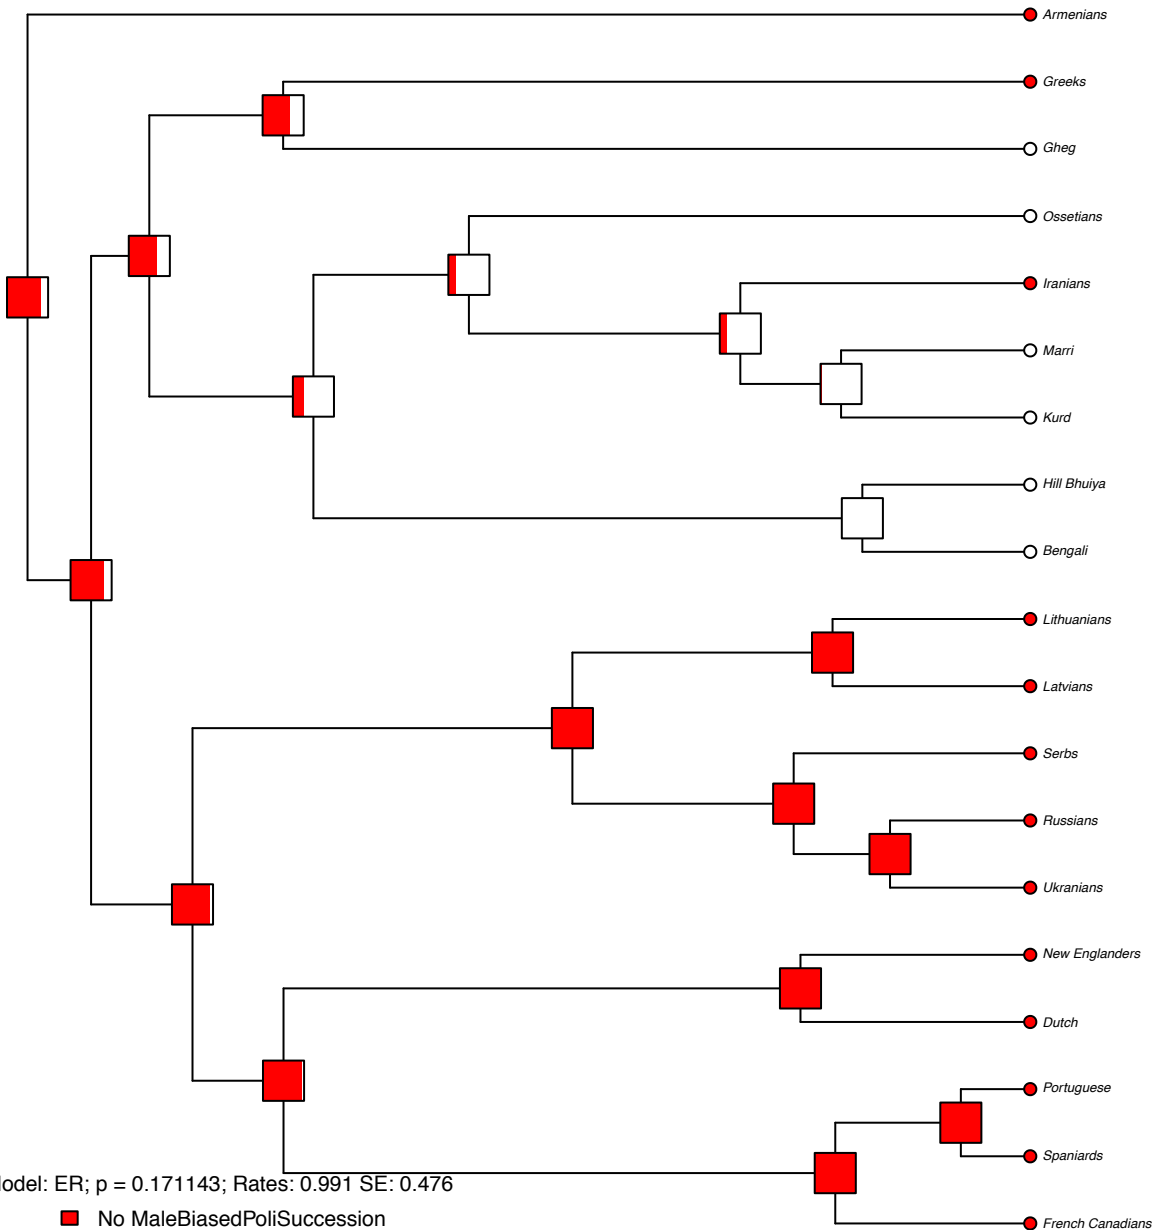

- Armenians
- Greeks
- Ghag
- Ossetians
- Iranians
- Marri
- Kurd
- Hill Bhuiya
- Bengali
- Lithuanians
- Latvians
- Serbs
- Russians
- Ukrainians
- New Englanders
- Dutch
- Portuguese
- Spaniards
- French Canadians

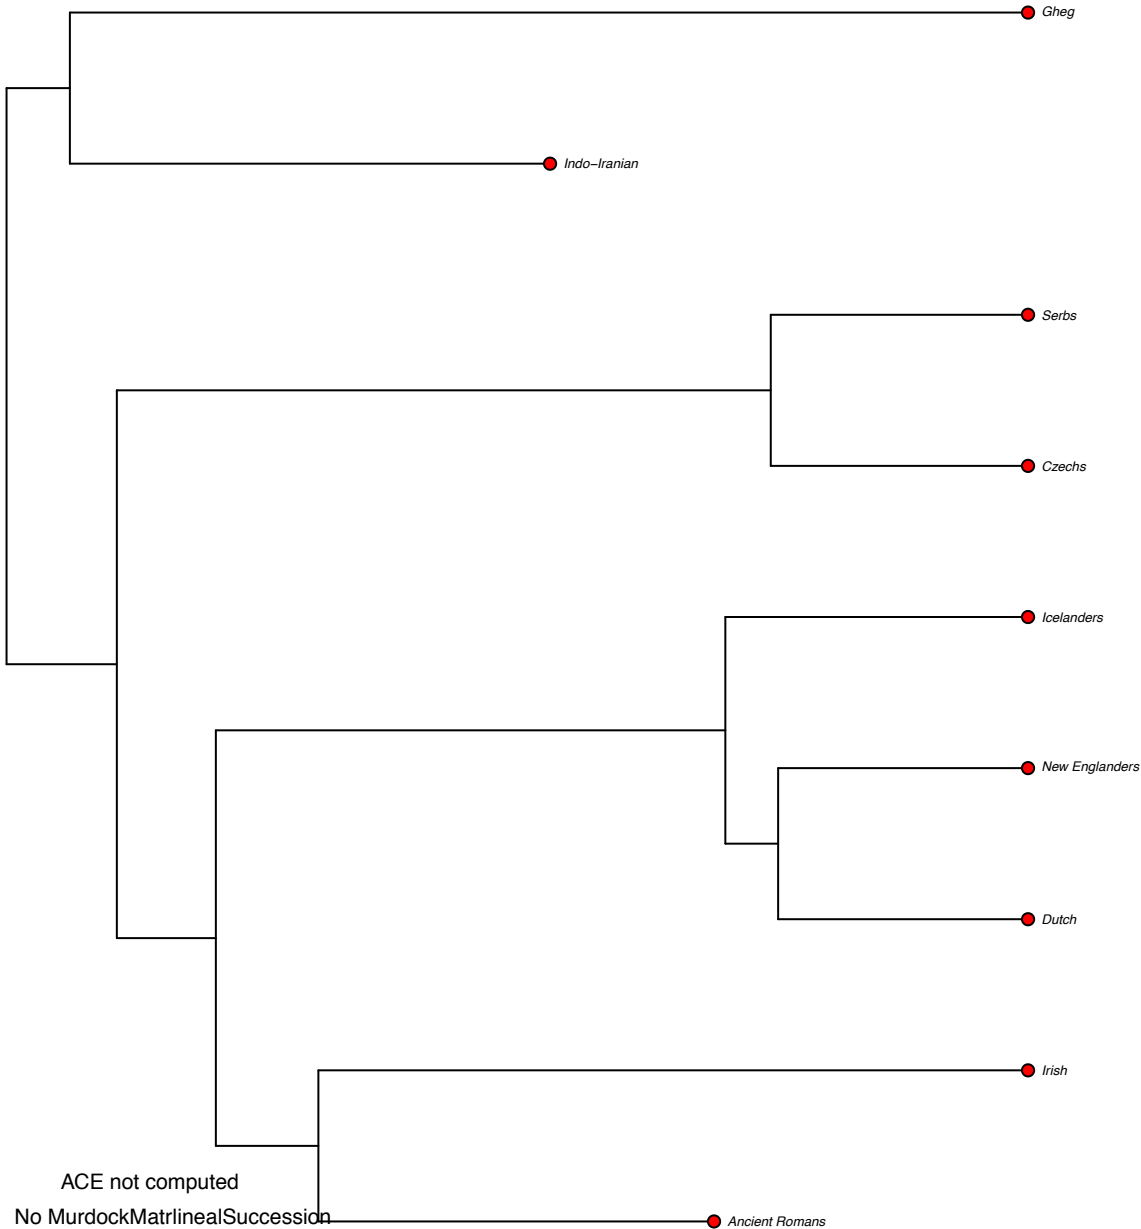

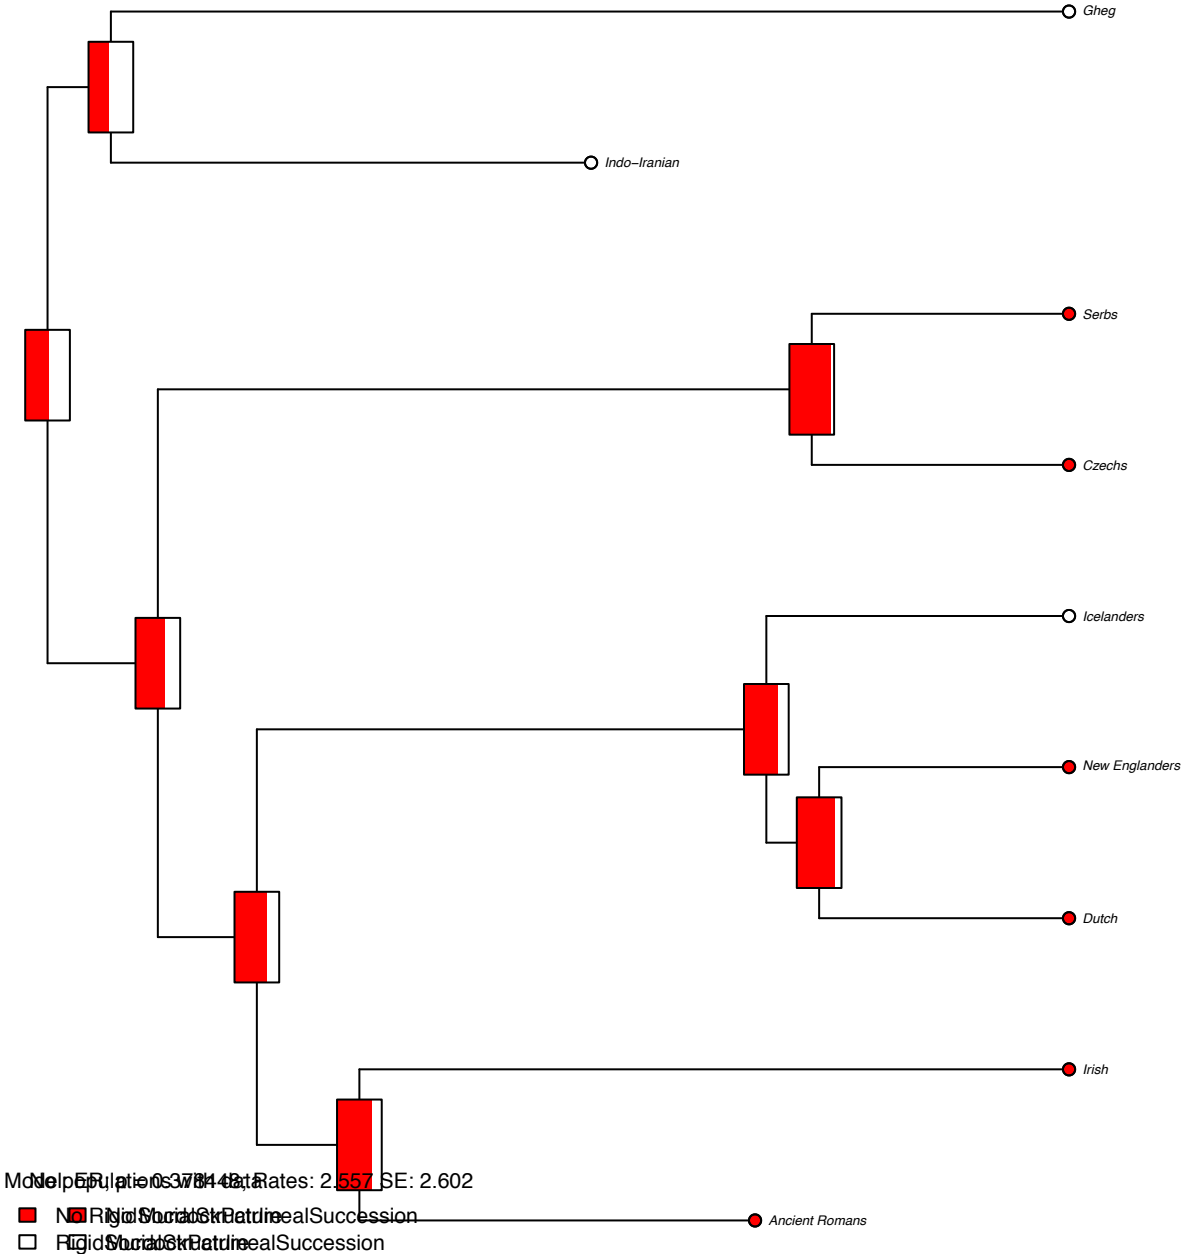

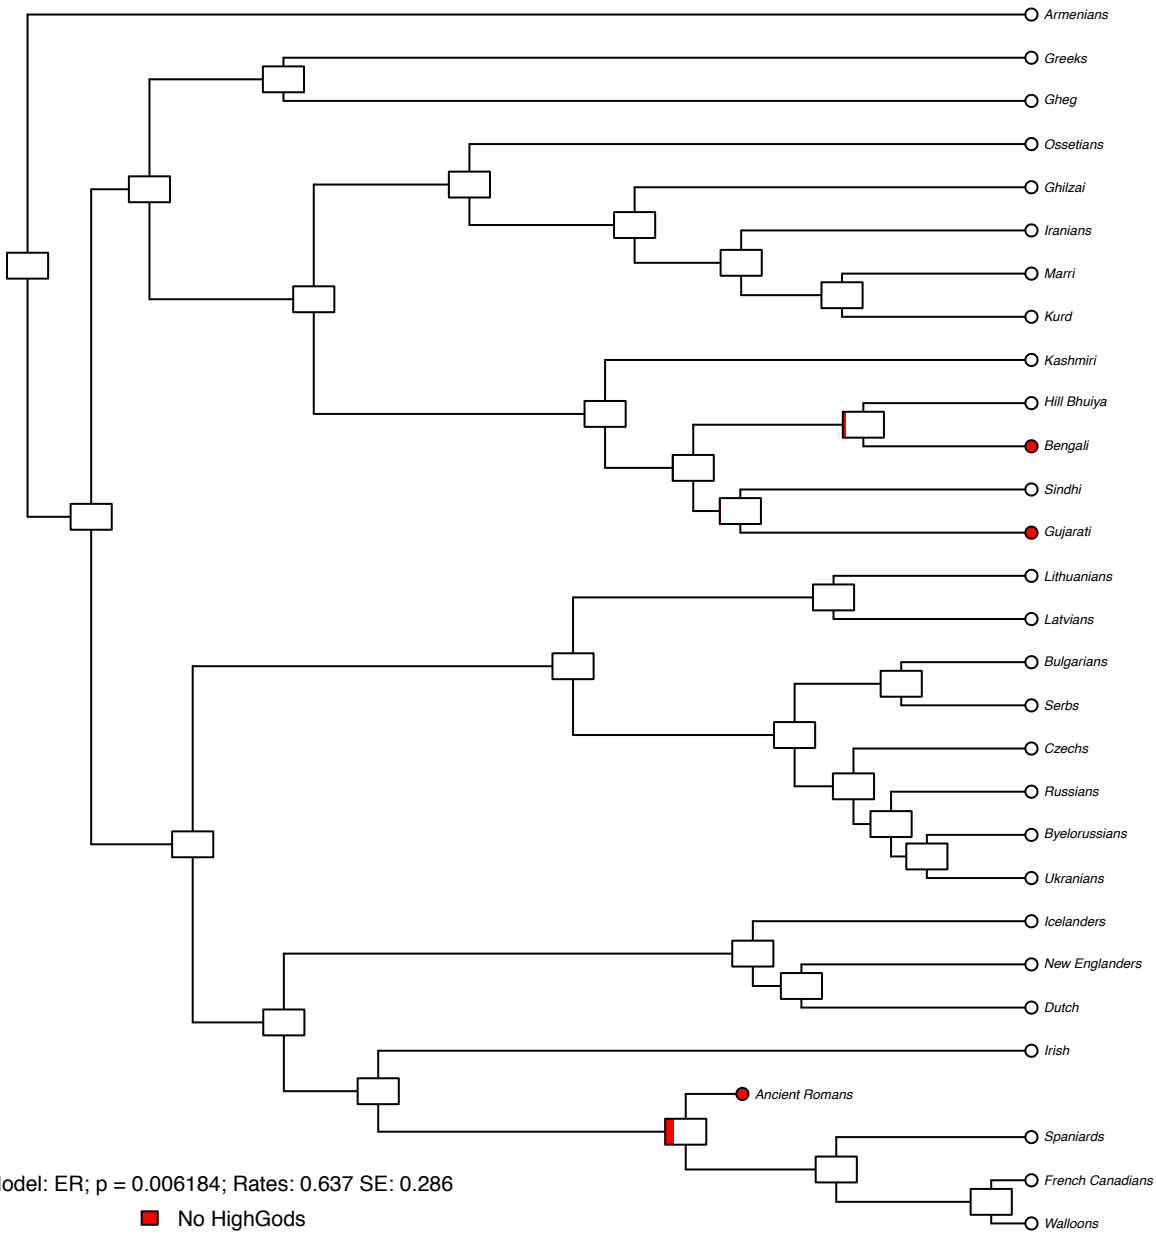

Model: ER;  $p = 0.006184$ ; Rates: 0.637 SE: 0.286

No HighGods  
 HighGods

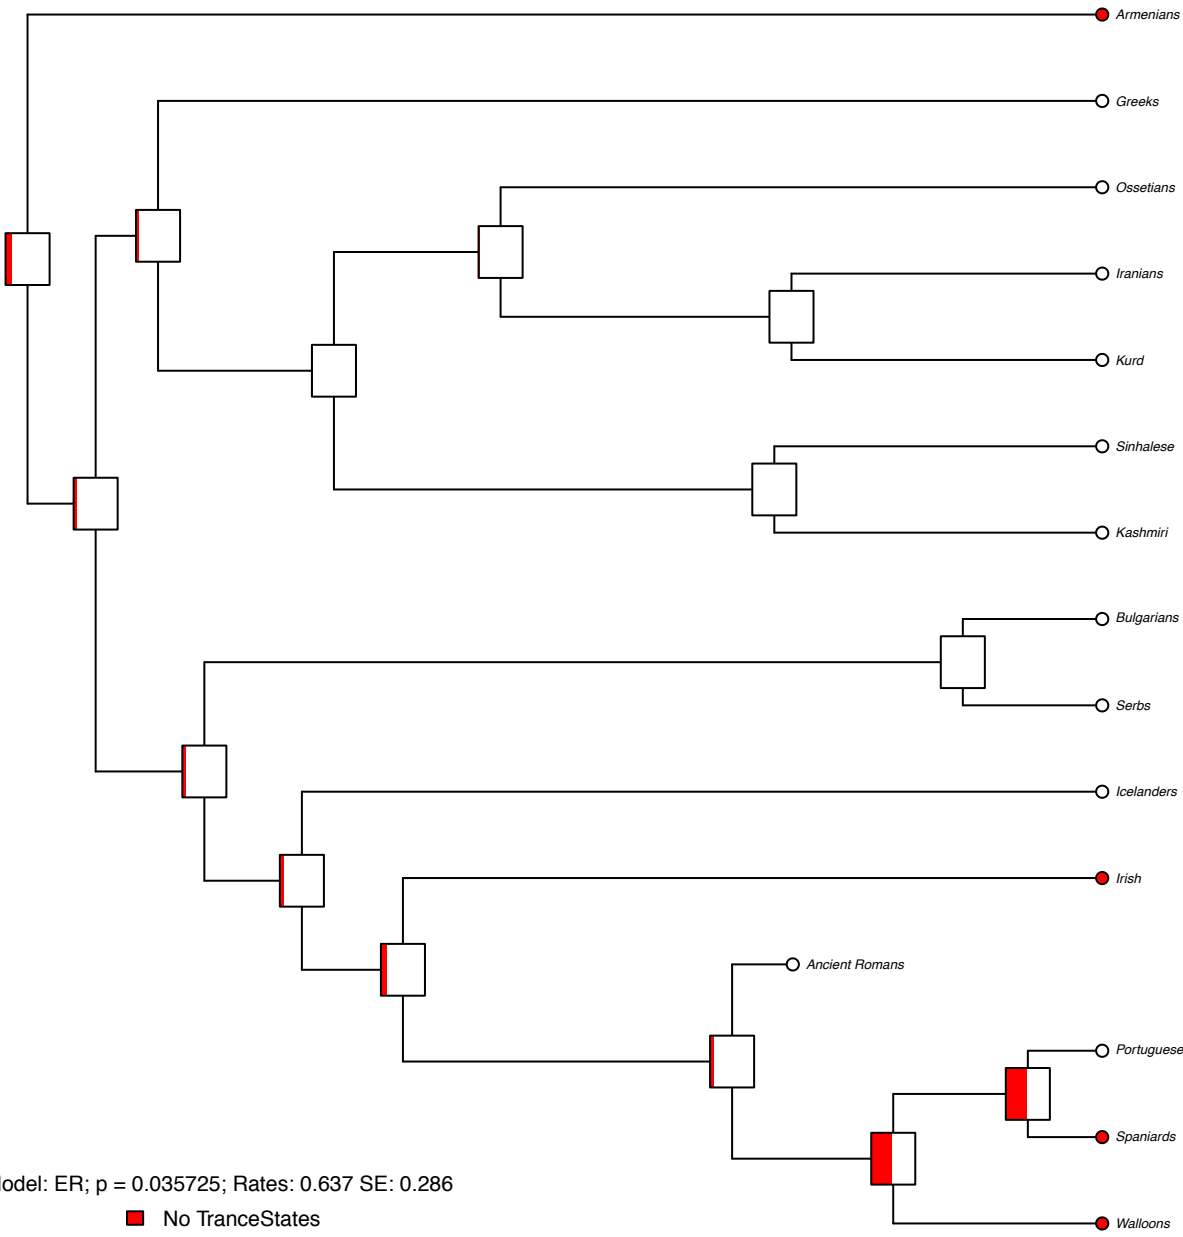

Model: ER;  $p = 0.035725$ ; Rates: 0.637 SE: 0.286

- No TranceStates
- TranceStates
